# Supplementary material
Source: PubMed Central journal article supplement (PMC9255557)
Supplement: NIHMS1817880-supplement-1.pdf [file NIHMS1817880-supplement-1.pdf]

## Investigators in the Costa Rica HPV Vaccine Trial (CVT) Group

Bernal Cortés, Paula González (deceased), Rolando Herrero, Silvia E. Jiménez, Carolina Porras, Ana Cecilia Rodríguez (Agencia Costarricense de Investigaciones Biomédicas (ACIB), formerly Proyecto Epidemiológico Guanacaste, PEG, Fundación INCIENSA, San José, Costa Rica); Allan Hildesheim, Aimée R. Kreimer, Douglas R. Lowy, Mark Schiffman, John T. Schiller, Mark Sherman, Sholom Wacholder (deceased) (United States National Cancer Institute, Bethesda, MD, USA); Ligia A. Pinto, Troy J. Kemp (Leidos Biomedical Research, Inc., Frederick National Laboratory for Cancer Research, Frederick, MD, USA); Mary K. Sidawy, (Georgetown University, Washington, DC, USA); Wim Quint, Leen-Jan van Doorn, Linda Struijk (DDL Diagnostic Laboratory, Netherlands); Joel M. Palefsky, Teresa M. Darragh (University of California, San Francisco, CA, USA); Mark H. Stoler (University of Virginia, Charlottesville, VA, USA).

## Supplementary methods

### Procedures

During the randomized phase, HPV DNA testing was performed on all cervical samples using the SPF10 polymerase chain reaction (PCR) Primer System and the DNA enzyme immunoassay (DEIA) with a line probe assay (LiPA) (Labo Bio-medical Products, Rijswijk, Netherlands) at the DDL Diagnostic Laboratory in Delft, Netherlands. HPV DNA genotyping was performed on SPF10-DEIA-positive samples using reverse hybridization with LiPA assay 25, testing for 25 HPV types, including carcinogenic (HPV 16, 18, 31, 33, 35, 39, 45, 51, 52, 56, 58, 59) and non-carcinogenic (HPV 6, 11, 34, 40, 42, 43, 44, 53, 54, 66, 68, 70, 73, and 74) types. During the long-term follow-up study, HPV DNA testing was replaced with a new next-generation sequencing assay, TypeSeq (National Cancer Institute Cancer Genomics Research Laboratory, Frederick, MD, USA), an affordable alternative that has demonstrated high overall and positive agreement with SPF10-LiPA.<sup>1</sup> TypeSeq assays were performed according to the TypeSeq 3-PCR stage workflow. TypeSeq identifies 51 HPV types (HPV 3, 6, 11, 13, 16, 18, 26, 28, 30, 31, 32, 33, 34, 35, 39, 40, 42, 43, 44, 45, 51, 52, 53, 54, 56, 58, 59, 61, 62, 66, 67, 68, 69, 70, 71, 72, 73, 74, 76, 81, 82, 83, 84, 85, 86, 87, 89, 90, 91, 97, and 114).

### Outcomes

Long-term HPV persistence ( $\geq 2$  years) was used to examine clinical unmasking (a resultant of decreased clinical intervention) on a virological endpoint as opposed to testing for virological replacement, which can be examined using shorter-term persistence ( $\geq 6$  months). Similar to our histological outcomes (CIN2+ and CIN3+), the primary virological outcome was  $\geq 2$ -year persistent infection with a non-preventable HPV type, restricting to only carcinogenic types (HPV 35/39/51/52/56/58/59). Secondary virological outcomes were  $\geq 2$ -year persistent infection: 1) irrespective of carcinogenic HPV type; 2) with HPV 16/18; and 3) with HPV 31/33/45.

### Statistical analyses

We reported the incidence proportion (attack rate) of the primary outcomes in the vaccinated ( $r^T$ ) and unvaccinated ( $r^U$ ) groups during years 1-4 and years 7-11; 95% confidence intervals (95% CIs) were calculated using the exact method with a mid-p correction.<sup>2</sup> Vaccine efficacy (VE) against histological outcomes was calculated, where  $VE = 100(1 - r^T/r^U)$ . Absolute rate difference (ARD) for each outcome was reported, where  $ARD = r^T - r^U$ . 95% confidence intervals (95% CIs) for VEs and ARDs were calculated using a standard, two-step approach, proposed by Rothman and colleagues and previously described.<sup>2,3</sup> For histological outcomes, we also reported rates, VEs and ARDs for years 1-11 combined. The cumulative rate,  $r_{cum}^G$ , for each group ( $G \in \{T, U\}$ ) was estimated as  $r_{cum}^G = r_{1-4}^G + (1 - r_{1-4}^{*G})(r_{7-11}^G)$ , where  $r_{1-4}^G$  and  $r_{7-11}^G$  denote the rates in years 1-4 and years 7-11 respectively and  $r_{1-4}^{*G}$  denotes the overall rate of CIN2+ (or CIN3+) regardless of attributable type. Asymptotic confidence intervals were calculated. Here, we describe our approach for estimating the variance of the event rates. For specificity, we considered the rates of CIN2+ attributable to HPV-16/18 infections in unvaccinated women. Let us define:

$N_1$ : Number of subjects in the unvaccinated cohort in years 1-4.

$X_1$ : Number of subjects with a CIN2+ attributable to HPV 16/18 in years 1-4.

$Y_1$ : Number of subjects with a CIN2+, regardless of type-attribution, in years 1-4.

$N_2$ : Number of subjects in the unvaccinated cohort in years 7-11.

$X_2$ : Number of subjects with a CIN2+ attributable to HPV 16/18 in years 7-11.

Then, we further defined  $\hat{r}_{1-4} = X_1/N_1$ ,  $\hat{r}_{1-4}^* = Y_1/N_1$ , and  $\hat{r}_{7-11} = \frac{X_2}{N_2}$ . Then the estimate of the cumulative rate was  $\hat{r}_{cum} = \hat{r}_{1-4} + (1 - \hat{r}_{1-4}^*)\hat{r}_{7-11}$ , the estimate of its variance was

$$\hat{\sigma}^2 = var(\hat{r}_{cum}) = \frac{\hat{r}_{1-4}(1 - \hat{r}_{1-4})}{N_1} + \left( \frac{\hat{r}_{1-4}^*(1 - \hat{r}_{1-4}^*)}{N_1} + (1 - \hat{r}_{1-4}^*)^2 \right) \left( \frac{\hat{r}_{7-11}(1 - \hat{r}_{7-11})}{N_2} + \hat{r}_{7-11}^2 \right) - (1 - \hat{r}_{1-4}^*)^2 \hat{r}_{7-11}^2 - \frac{\hat{r}_{7-11} \hat{r}_{1-4} (1 - \hat{r}_{1-4})}{N_1}$$

and the estimate of its 95% confidence interval was  $\hat{r}_{cum} \pm 1.96 \sqrt{\hat{\sigma}^2}$ .

We then calculated VE and ARD based on these rates and corresponding CIs using an unconditional bootstrap percentile method<sup>4</sup> with 5000 bootstrap datasets, where resampling was done with replacement.

**Supplementary Table 1. Bivalent HPV vaccine efficacy against incident 2-year HPV persistence by type among women with at least 1 follow-up visit during year 7-11 and no endpoint prior to year 7.**

| HPV Type                                   | Years 7-11              |     |                         |                         |     |                         |                       |                                         |
|--------------------------------------------|-------------------------|-----|-------------------------|-------------------------|-----|-------------------------|-----------------------|-----------------------------------------|
|                                            | HPV<br>(N women = 2453) |     |                         | UCG<br>(N women = 2344) |     |                         | Vaccine Efficacy<br>% | Absolute Rate<br>Difference<br>$\Delta$ |
|                                            | Infections              | #   | Attack Rate<br>(95% CI) | Infections              | #   | Attack Rate<br>(95% CI) |                       |                                         |
| Irrespective of<br>carcinogenic HPV type   | 29,117                  | 172 | 5.9 (5.1, 6.9)          | 27,952                  | 226 | 8.1 (7.0, 9.4)          | 26.9% (9.5%, 40.9%)   | -2.2 (-3.7, -0.7)                       |
| HPV 16/18                                  | 4,853                   | 3   | 0.6 (0.2, 1.9)          | 4,638                   | 50  | 10.8 (8.2, 14.2)        | 94.3% (81.6%, 98.2%)  | -10.2 (-13.2, -7.1)                     |
| HPV 31/33/45                               | 7,305                   | 18  | 2.5 (1.6, 3.9)          | 6,995                   | 59  | 8.4 (6.4, 11.0)         | 70.7% (50.1%, 82.8%)  | -6.0 (-8.5, -3.4)                       |
| Without HPV<br>16/18/31/33/45 <sup>a</sup> | 16,959                  | 151 | 8.9 (7.6, 10.5)         | 16,319                  | 117 | 7.2 (5.9, 8.8)          | -24.4% (-61.2%, 4.0%) | 1.7 (-0.3, 3.8)                         |

CI = confidence interval; HPV = human papillomavirus; UCG = new unvaccinated control group.

Rates are expressed as per 1,000 infections.

<sup>a</sup> Without HPV 16/18/31/33/45 includes HPV 35/39/51/52/56/58/59.

**Supplementary Table 2. Association between HPV vaccination and LEEPs prior to year 7.**

|                                | HPV Vaccine (Years 0-6) | Control (Years 0-6) | Fisher's exact test p-value |
|--------------------------------|-------------------------|---------------------|-----------------------------|
| N                              | 3736                    | 3736                |                             |
| Number of LEEPs (cumulative %) | 221 (5.9)               | 277 (7.4)           | 0.01                        |

HPV = human papillomavirus; LEEP = Loop Electrosurgical Excision Procedure.

**Supplementary Table 3. Association between LEEPs prior to year 7 and CIN2+ during years 7-11 in the HPV vaccine arm.**

|                                                     | <b># of women with CIN2+ attributed to non-preventable types in years 7-11 in HPV vaccine arm (N = 63)</b> | <b>Fisher's exact test p-value</b> |
|-----------------------------------------------------|------------------------------------------------------------------------------------------------------------|------------------------------------|
| # of women with LEEPs prior to year 7 (N = 190)     | 0 (0%)                                                                                                     | 0.03                               |
| # of women without LEEPs prior to year 7 (N = 2713) | 63 (2.3%)                                                                                                  |                                    |

CIN = cervical intraepithelial neoplasia; HPV = human papillomavirus; LEEP = loop electrosurgical excision procedure.

**Supplementary Table 4. Distribution of HPV types among CIN2+ and CIN3+ events caused by non-vaccine-preventable types by period and study arm.**

| HPV Type                            | Years 1-4            |                  | Years 7-11           |              |
|-------------------------------------|----------------------|------------------|----------------------|--------------|
|                                     | HPV Vaccine<br># (%) | Control<br># (%) | HPV Vaccine<br># (%) | UCG<br># (%) |
| <b>CIN2+</b>                        |                      |                  |                      |              |
| Total                               | 43                   | 43               | 61                   | 33           |
| HPV 52/58 only <sup>a</sup>         | 17 (39·5)            | 19 (44·2)        | 25 (41·0)            | 10 (30·3)    |
| HPV 52                              | 9 (20·9)             | 12 (27·9)        | 14 (23·0)            | 3 (9·1)      |
| HPV 58                              | 11 (25·6)            | 10 (23·3)        | 14 (23·0)            | 7 (21·2)     |
| Any HPV 35/39/51/56/59 <sup>a</sup> | 19 (44·2)            | 16 (37·2)        | 25 (41·0)            | 16 (48·5)    |
| HPV 35                              | 6 (14·0)             | 3 (7·0)          | 5 (8·2)              | 6 (18·2)     |
| HPV 39                              | 4 (9·3)              | 2 (4·7)          | 6 (9·8)              | 7 (21·2)     |
| HPV 51                              | 8 (18·6)             | 7 (16·3)         | 8 (13·1)             | 5 (15·2)     |
| HPV 56                              | 1 (2·3)              | 3 (7·0)          | 6 (9·8)              | 3 (9·1)      |
| HPV 59                              | 3 (7·0)              | 1 (2·3)          | 2 (3·3)              | 2 (6·1)      |
| Non-carcinogenic HPV only           | 3 (7·0)              | 8 (18·6)         | 7 (11·5)             | 5 (15·2)     |
| Unknown                             | 4 (9·3)              | 0 (0·0)          | 4 (6·6)              | 2 (6·1)      |
| <b>CIN3+</b>                        |                      |                  |                      |              |
| Total <sup>a</sup>                  | 21                   | 18               | 41                   | 16           |
| HPV 52/58 only <sup>a</sup>         | 9 (42·9)             | 8 (44·4)         | 20 (48·8)            | 5 (31·3)     |
| HPV 52                              | 6 (28·6)             | 5 (27·8)         | 9 (22·0)             | 0 (0·0)      |
| HPV 58                              | 4 (19·0)             | 6 (33·3)         | 13 (31·7)            | 5 (31·3)     |
| Any HPV 35/39/51/56/59 <sup>a</sup> | 9 (42·9)             | 8 (44·4)         | 17 (41·5)            | 8 (50·0)     |
| HPV 35                              | 3 (14·3)             | 1 (5·6)          | 3 (7·3)              | 5 (31·3)     |
| HPV 39                              | 1 (4·8)              | 0 (0·0)          | 4 (9·8)              | 2 (12·5)     |
| HPV 51                              | 4 (19·0)             | 5 (27·8)         | 6 (14·6)             | 3 (18·8)     |
| HPV 56                              | 2 (9·5)              | 1 (5·6)          | 3 (7·3)              | 1 (6·3)      |
| HPV 59                              | 1 (4·8)              | 1 (5·6)          | 2 (4·9)              | 1 (6·3)      |
| Non-carcinogenic HPV only           | 1 (4·8)              | 2 (11·1)         | 3 (7·3)              | 2 (12·5)     |
| Unknown                             | 2 (9·5)              | 0 (0·0)          | 1 (2·4)              | 1 (6·3)      |

CIN = cervical intraepithelial neoplasia; HPV = human papillomavirus; UCG = new unvaccinated control group.

<sup>a</sup> The sum of the percentages for each individual HPV type do not equal 100% due to some overlapping type co-infections.

**Supplementary Table 5. Comparison of endpoints in the control arm and unvaccinated control group prior to year 7.**

|                                          | Control (Years 0-6) | UCG (Years 4-6) | Fisher's exact test p-value |
|------------------------------------------|---------------------|-----------------|-----------------------------|
| N                                        | 3736                | 2836            |                             |
| Number of CIN2+ events, n (cumulative %) | 203 (5.4)           | 120 (4.2)       | 0.03                        |
| Number of CIN3+ events, n (cumulative %) | 108 (2.9)           | 90 (3.2)        | 0.51                        |

CIN = cervical intraepithelial neoplasia; HPV = human papillomavirus; UCG = unvaccinated control group.

**Supplementary Table 6. Comparison of LEEPs in the HPV vaccine arm, control arm, and unvaccinated control group prior to year 7 to evaluate potential biases and differences between groups.**

|                                     | HPV Vaccine (Years 0-6)<br>n (%) | Control (Years 0-6)<br>n (%) | UCG (Years 4-6)<br>n (%) | Fisher's exact test <sup>a</sup><br>p-value |
|-------------------------------------|----------------------------------|------------------------------|--------------------------|---------------------------------------------|
| N                                   | 3726                             | 3736                         | 2836                     |                                             |
| Number of LEEPs (cumulative %)      | 221 (5.9)                        | 277 (7.4)                    | 158 (5.6)                |                                             |
| Endpoint in LEEP prior to year 7    |                                  |                              |                          |                                             |
| CIN2+                               | 153 (69.2)                       | 194 (70.0)                   | 119 (75.3)               |                                             |
| No CIN2+                            | 68 (30.8)                        | 83 (30.0)                    | 39 (24.7)                |                                             |
| Potential truncation % <sup>b</sup> | 1.8%                             | 2.2%                         | 1.4%                     | 0.17                                        |

CIN = cervical intraepithelial neoplasia; HPV= Human papillomavirus; LEEP = loop electrosurgical excisional procedure; UCG = unvaccinated control group.

<sup>a</sup> The Fisher's exact test compares potential truncation between the HPV vaccine arm and UCG.

<sup>b</sup> Potential truncation represents the proportion of at-risk women that could have had CIN2+ had they not received a LEEP, calculated by dividing the total number of LEEPs prior to year 7 among women without a CIN2+ diagnosis by the total number of women at-risk at enrollment conclusion (N).



Supplementary Table 7. Patterns of screening and detection prior to year 7 by study arm and HPV type.

| Arm                                                            | N    | HPV 16/18, 31/33/45, and additional high-risk infection |      | HPV 16/18, 31/33/45, and no additional high-risk infection |      | HPV 16/18 and additional high-risk infection |       | HPV 16/18 and no additional high-risk infection |       | HPV 31/33/45 and additional high-risk infection |      | HPV 31/33/45 and no additional high-risk infection |       | HPV 35/39/51/52/56/58/59 infection |       | No carcinogenic HPV infections |        | No Results |      |
|----------------------------------------------------------------|------|---------------------------------------------------------|------|------------------------------------------------------------|------|----------------------------------------------|-------|-------------------------------------------------|-------|-------------------------------------------------|------|----------------------------------------------------|-------|------------------------------------|-------|--------------------------------|--------|------------|------|
|                                                                |      | n                                                       | %    | n                                                          | %    | n                                            | %     | n                                               | %     | n                                               | %    | n                                                  | %     | n                                  | %     | n                              | %      | n          | %    |
| <b>No colposcopy triggered and attended visit at 48 months</b> |      |                                                         |      |                                                            |      |                                              |       |                                                 |       |                                                 |      |                                                    |       |                                    |       |                                |        |            |      |
| HPV Vaccine                                                    | 2251 | 0                                                       | 0.00 | 0                                                          | 0.00 | 5                                            | 0.22  | 15                                              | 0.67  | 19                                              | 0.84 | 27                                                 | 1.20  | 246                                | 10.93 | 1935                           | 85.96  | 4          | 0.18 |
| Control                                                        | 2136 | 2                                                       | 0.09 | 2                                                          | 0.09 | 13                                           | 0.61  | 44                                              | 2.06  | 26                                              | 1.22 | 51                                                 | 2.39  | 231                                | 10.81 | 1763                           | 82.54  | 4          | 0.19 |
| UCG                                                            | 2279 | 1                                                       | 0.04 | 6                                                          | 0.26 | 19                                           | 0.83  | 57                                              | 2.50  | 10                                              | 0.44 | 38                                                 | 1.67  | 167                                | 7.33  | 1979                           | 86.84  | 2          | 0.09 |
| <b>Triggered colposcopy: no LEEP prior to year 7</b>           |      |                                                         |      |                                                            |      |                                              |       |                                                 |       |                                                 |      |                                                    |       |                                    |       |                                |        |            |      |
| HPV Vaccine                                                    | 891  | 10                                                      | 1.12 | 3                                                          | 0.34 | 26                                           | 2.92  | 62                                              | 6.96  | 27                                              | 3.03 | 49                                                 | 5.50  | 343                                | 38.50 | 371                            | 41.64  | 0          | 0.00 |
| Control                                                        | 978  | 10                                                      | 1.02 | 24                                                         | 2.45 | 83                                           | 8.49  | 93                                              | 9.51  | 43                                              | 4.40 | 74                                                 | 7.57  | 294                                | 30.06 | 357                            | 36.50  | 0          | 0.00 |
| UCG                                                            | 399  | 2                                                       | 0.50 | 7                                                          | 1.75 | 25                                           | 6.27  | 46                                              | 11.53 | 16                                              | 4.01 | 34                                                 | 8.52  | 139                                | 34.84 | 130                            | 32.58  | 0          | 0.00 |
| <b>Triggered colposcopy: LEEP prior to year 7/ no CIN2+</b>    |      |                                                         |      |                                                            |      |                                              |       |                                                 |       |                                                 |      |                                                    |       |                                    |       |                                |        |            |      |
| HPV Vaccine                                                    | 72   | 4                                                       | 5.56 | 1                                                          | 1.39 | 1                                            | 1.39  | 5                                               | 6.94  | 7                                               | 9.72 | 4                                                  | 5.56  | 27                                 | 37.50 | 23                             | 31.94  | 0          | 0.00 |
| Control                                                        | 91   | 7                                                       | 7.69 | 5                                                          | 5.49 | 8                                            | 8.79  | 19                                              | 20.88 | 4                                               | 4.40 | 10                                                 | 10.99 | 22                                 | 24.18 | 16                             | 17.58  | 0          | 0.00 |
| UCG                                                            | 39   | 2                                                       | 5.13 | 1                                                          | 2.56 | 6                                            | 15.38 | 6                                               | 15.38 | 0                                               | 0.00 | 7                                                  | 17.95 | 10                                 | 25.64 | 7                              | 17.95  | 0          | 0.00 |
| <b>Triggered colposcopy: LEEP prior to year 7/ CIN2+</b>       |      |                                                         |      |                                                            |      |                                              |       |                                                 |       |                                                 |      |                                                    |       |                                    |       |                                |        |            |      |
| HPV Vaccine                                                    | 160  | 5                                                       | 3.13 | 7                                                          | 4.38 | 24                                           | 15.00 | 29                                              | 18.13 | 13                                              | 8.13 | 20                                                 | 12.50 | 51                                 | 31.88 | 11                             | 6.88   | 0          | 0.00 |
| Control                                                        | 209  | 9                                                       | 4.31 | 11                                                         | 5.26 | 33                                           | 15.79 | 55                                              | 26.32 | 15                                              | 7.18 | 19                                                 | 9.09  | 49                                 | 23.44 | 18                             | 8.61   | 0          | 0.00 |
| UCG                                                            | 119  | 6                                                       | 5.04 | 10                                                         | 8.40 | 17                                           | 14.29 | 36                                              | 30.25 | 8                                               | 6.72 | 10                                                 | 8.40  | 28                                 | 23.53 | 4                              | 3.36   | 0          | 0.00 |
| <b>Total triggered colposcopies</b>                            |      |                                                         |      |                                                            |      |                                              |       |                                                 |       |                                                 |      |                                                    |       |                                    |       |                                |        |            |      |
| HPV Vaccine                                                    | 1123 | 19                                                      | 1.69 | 11                                                         | 0.98 | 51                                           | 4.54  | 96                                              | 8.55  | 47                                              | 4.19 | 73                                                 | 6.50  | 421                                | 37.49 | 405                            | 36.06  | 0          | 0.00 |
| Control                                                        | 1278 | 26                                                      | 2.03 | 40                                                         | 3.13 | 124                                          | 9.70  | 167                                             | 13.07 | 62                                              | 4.85 | 103                                                | 8.06  | 365                                | 28.56 | 391                            | 30.597 | 0          | 0.00 |
| UCG                                                            | 557  | 10                                                      | 1.80 | 18                                                         | 3.23 | 48                                           | 8.62  | 88                                              | 15.80 | 24                                              | 4.31 | 51                                                 | 9.16  | 177                                | 31.78 | 141                            | 25.31  | 0          | 0.00 |

HPV = human papillomavirus; LEEP = loop electrosurgical excisional procedures; UCG = new unvaccinated control group.

**A) CIN2+**

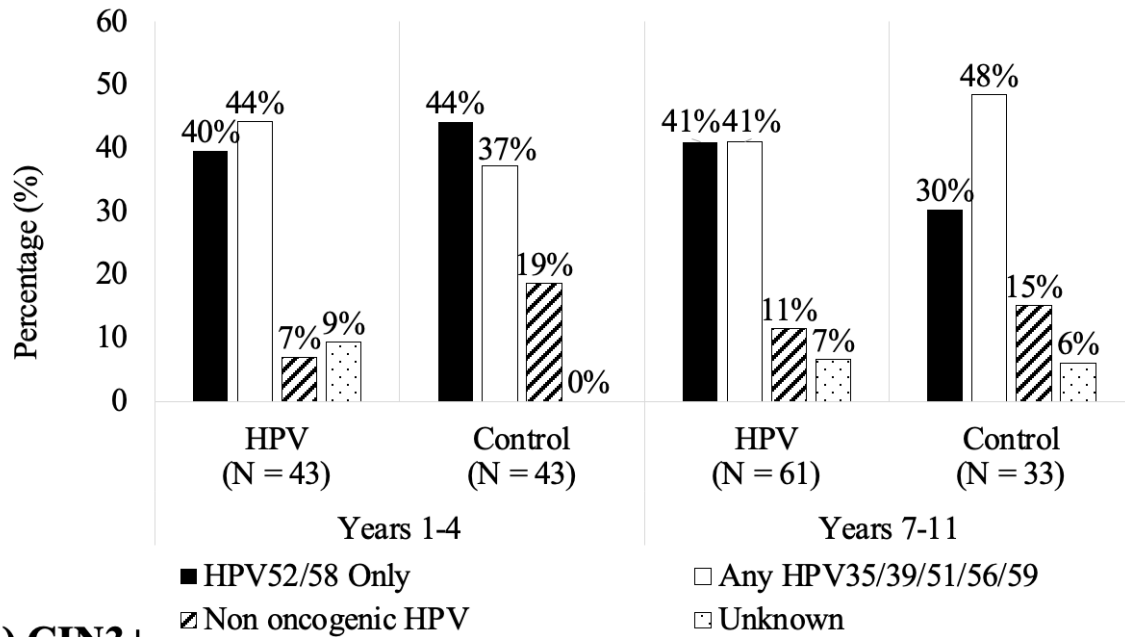

**B) CIN3+**

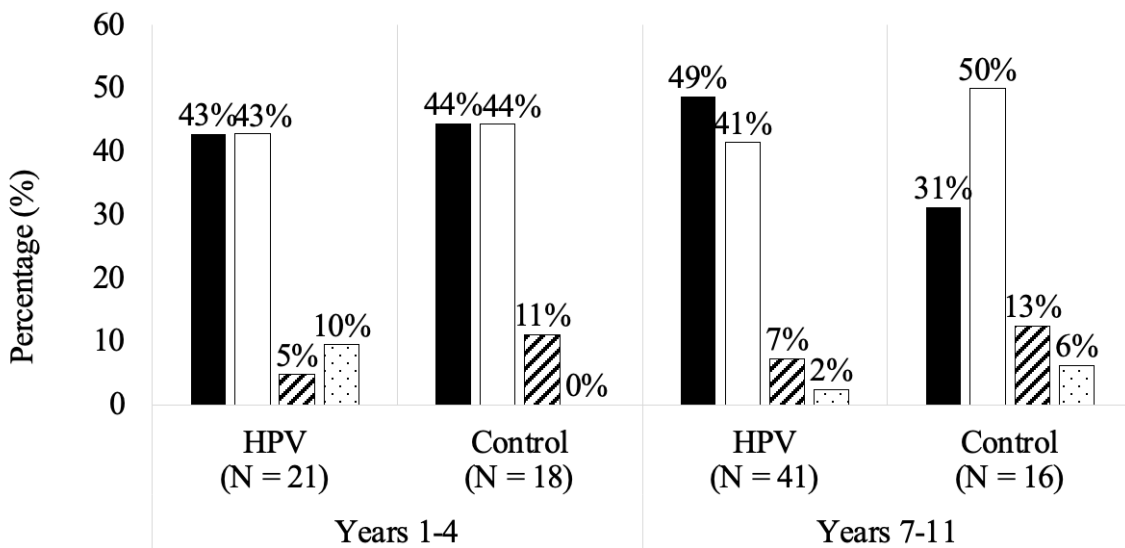

**Supplementary Figure 1. Bar graph of the HPV type distribution among unmasked A) CIN2+ and B) CIN3+ events, caused by non-vaccine-preventable types by period and study arm.**

## References

- 1 Wagner S, Roberson D, Boland J, *et al.* Evaluation of TypeSeq, a novel high-throughput, low-cost, next-generation sequencing-based assay for detection of 51 human papillomavirus genotypes. *The Journal of Infectious Diseases* 2019; **220**: 1609–19.
- 2 Rothman KJ, Boice JD. Epidemiologic analysis with a programmable calculator. Bethesda, Md.]; Washington: U.S. Dept. of Health, Education, and Welfare, Public Health Service, National Institutes of Health; For sale by the Supt. of Docs., 1979.
- 3 Tsang SH, Sampson JN, Schussler J, *et al.* Durability of cross-protection by different schedules of the bivalent HPV vaccine: the CVT Trial. *JNCI: Journal of the National Cancer Institute* 2020; **112**: 1030–7.
- 4 Efron B. The jackknife, the bootstrap and other resampling plans. Society for Industrial and Applied Mathematics, 1982 DOI:10.1137/1.9781611970319.

**CONFIDENTIAL**

NCI Protocol # 04-C-N191; GSK Protocol # 580299/009 (HPV-009)  
Amendment 5

**Title:** A double blind, controlled, randomized, phase III study of the efficacy of an HPV16/18 VLP vaccine in the prevention of advanced cervical intraepithelial neoplasia (CIN2, CIN3, adenocarcinoma *in situ* [AIS] and invasive cervical cancer) associated with HPV16 or HPV18 cervical infection in healthy young adult women in Costa Rica

**Study Vaccines:** Candidate vaccine: HPV16/18 virus-like particles with AS04 adjuvant

**Control vaccine:** Investigational formulation of Havrix® containing 720 ELISA units of Hepatitis A antigen

**NCI Protocol number:** 04-C-N191

**GSK Protocol number:** 580299/009 (HPV-009)

**Investigational New Drug (IND) number:** BB-IND 7920 (held by GSK Biologicals)

**Version/Date:** Final version: 12 May 2004  
Amendment 1: 29 March 2005  
Amendment 2: 31 October 2005  
Amendment 3: 19 May 2006  
Amendment 4: 13 November 2008  
*Amendment 5: 10 September 2009*

**Coordinating authors:** Allan Hildesheim, NCI Principal Investigator and Rolando Herrero, Costa Rica Principal Investigator

**Medical Monitor:** Mark Schiffman, NCI

**Contributing authors:** Sholom Wacholder, NCI Statistician  
Douglas Lowy, NCI Virologist  
John Schiller, NCI Virologist

**CONFIDENTIAL**

NCI Protocol # 04-C-N191; GSK Protocol # 580299/009 (HPV-009)  
Amendment 5

**Protocol Amendment Sponsor Signatory Approval**

**NCI Protocol number:** 04-C-N191  
**GSK Protocol number:** 580299/009 (HPV-009)  
**IND number:** BB-IND 7920 (held by GSK Biologicals)  
**Date of approval:** Final Version: 12 May 2004  
Amendment 1: 29 March 2005  
Amendment 2: 31 October 2005  
Amendment 3: 19 May 2006  
Amendment 4: 13 November 2008  
***Amendment 5: 10 September 2009***

**Title:** A double blind, controlled, randomized, phase III study of the efficacy of an HPV16/18 VLP vaccine in the prevention of advanced cervical intraepithelial neoplasia (CIN2, CIN3, adenocarcinoma *in situ* [AIS] and invasive cervical cancer) associated with HPV16 or HPV18 cervical infection in healthy young adult women in Costa Rica

**NCI Sponsor signatory:** Allan Hildesheim, Ph.D.  
Environmental Epidemiology Branch  
Division of Cancer Epidemiology and Genetics (DCEG)  
National Cancer Institute  
6120 Executive Boulevard, Room 7062  
Rockville, MD 20852-7234  
Tel: 301-496-1691  
Fax: 301-402-0916  
Email: hildesha@exchange.nih.gov

**Signature:** \_\_\_\_\_

**Date:** \_\_\_\_\_

**GSK Sponsor signatory:** Dominique Descamps  
(Amended: 13 Nov 2008) Director, Clinical Development  
HPV vaccines, GlaxoSmithKline Biologicals

**Signature:** \_\_\_\_\_

**Date:** \_\_\_\_\_

For internal use only

-----Checksum-----!Ver.!Created On - -  
319d3377bba36f889eb1b4f897ce733a 4.5 23/09/2009 06:30:31 PM  
-----

**CONFIDENTIAL**

NCI Protocol # 04-C-N191; GSK Protocol # 580299/009 (HPV-009)  
Amendment 5

## **Protocol Amendment Investigator Agreement**

**NCI Protocol number:** 04-C-N191

**GSK Protocol number:** 580299/009 (HPV-009)

**IND number:** BB-IND 7920 (held by GSK Biologicals)

**Title:** A double blind, controlled, randomized, phase III study of the efficacy of an HPV16/18 VLP vaccine in the prevention of advanced cervical intraepithelial neoplasia (CIN2, CIN3, adenocarcinoma in situ [AIS] and invasive cervical cancer) associated with HPV16 or HPV18 cervical infection in healthy young adult women in Costa Rica

I agree:

- To assume responsibility for the proper conduct of the study at this site.
- To conduct the study in compliance with this protocol and with any mutually agreed future protocol amendments.
- Not to implement any changes to the protocol without agreement from the sponsors (NCI and GSK Biologicals) (Amended: 29 Mar 2005) and prior review and written approval from the Institutional Review Board (IRB) or Independent Ethics Committee (IEC), except where necessary to eliminate an immediate hazard to the subjects, or for administrative aspects of the study (where permitted by all applicable regulatory requirements).
- That I am thoroughly familiar with the appropriate use of the vaccine(s), as described in this protocol, and any other information provided by the sponsor, including, but not limited to, the following: the current Investigator's Brochure (IB) or equivalent document, IB supplement (if applicable), prescribing information (in the case of a marketed vaccine) and/or Master Data Sheet (if the Master Data Sheet exists and serves as reference document for the vaccine in the case of a marketed vaccine).
- That I am aware of, and will comply with, "Good Clinical Practices" (GCP) and all applicable regulatory requirements.
- That I have been informed that certain regulatory authorities require the sponsor (GSK Biologicals) (Amended: 29 Mar 2005) to obtain and supply, as necessary, details about the investigator's ownership interest in the sponsor or the investigational product, and more generally about his/her financial ties with the sponsor (GSK Biologicals) (Amended: 29 Mar 2005). GSK Biologicals will use and disclose the information solely for the purpose of complying with regulatory requirements.

**CONFIDENTIAL**

NCI Protocol # 04-C-N191; GSK Protocol # 580299/009 (HPV-009)  
Amendment 5

Hence I:

- Agree to supply GSK Biologicals with any necessary information regarding ownership interest and financial ties (including those of my spouse and dependent children).
- Agree to promptly update this information if any relevant changes occur during the course of the study and for 1 year following completion of the study.
- Agree that GSK Biologicals may disclose any information it has about such ownership interests and financial ties to regulatory authorities.
- Agree to provide GSK Biologicals with an updated Curriculum Vitae and other FDA required documents.

Investigator name: Rolando Herrero, MD

\_\_\_\_\_  
Investigator signature

\_\_\_\_\_  
Date

For internal use only

-----Checksum-----!Ver.!Created On - -  
319d3377bba36f889eb1b4f897ce733a 4.5 23/09/2009 06:30:31 PM  
-----

**CONFIDENTIAL**NCI Protocol # 04-C-N191; GSK Protocol # 580299/009 (HPV-009)  
Amendment 5**List of Abbreviations**

|                     |                                                                                                                               |
|---------------------|-------------------------------------------------------------------------------------------------------------------------------|
| AE                  | Adverse event                                                                                                                 |
| AER                 | Adverse Event Report form                                                                                                     |
| AGC                 | Atypical glandular cells (endocervical, endometrial, or glandular; favor neoplastic or not otherwise specified)               |
| AIS                 | Adenocarcinoma <i>in situ</i>                                                                                                 |
| Al(OH) <sub>3</sub> | Aluminum hydroxide                                                                                                            |
| AS04                | Investigational adjuvant consisting of aluminum salts and MPL®. Formerly called SBAS4                                         |
| ASC                 | Atypical squamous cells (includes ASC-H and ASC-US)                                                                           |
| ASC-H               | Atypical squamous cells – cannot exclude high-grade squamous intraepithelial lesion                                           |
| ASC-H+              | Atypical squamous cells – cannot exclude high-grade squamous intraepithelial lesion that are positive for HPV by HCII Probe B |
| ASC-US              | Atypical squamous cells of undetermined significance                                                                          |
| ASC-US+             | Atypical squamous cells of undetermined significance that are positive for HPV by HCII Probe B                                |
| ATP                 | According to protocol                                                                                                         |
| BBI                 | Boston Biomedica Inc.                                                                                                         |
| BB-IND              | Biologics Bureau-Investigational New Drug Application                                                                         |
| BLA                 | Biologic License Application                                                                                                  |
| °C                  | Degrees Centigrade                                                                                                            |
| CCR                 | Center for Cancer Research                                                                                                    |
| CFR                 | Code of federal regulations                                                                                                   |
| CIF                 | Colposcopy Intake Form                                                                                                        |
| CIN                 | Cervical intraepithelial neoplasia                                                                                            |



**CONFIDENTIAL**

NCI Protocol # 04-C-N191; GSK Protocol # 580299/009 (HPV-009)

Amendment 5

|       |                                                                                                             |
|-------|-------------------------------------------------------------------------------------------------------------|
| CIN2+ | Cervical intraepithelial neoplasia grades 2/3, adenocarcinoma <i>in situ</i> , and invasive cervical cancer |
| CIS   | Carcinoma <i>in situ</i>                                                                                    |
| CONIS | Scientific Research National Council of the Ministry of Health, Costa Rica                                  |
| CRA   | Clinical Research Associate                                                                                 |
| CRF   | Case Report Form                                                                                            |
| CRVT  | Costa Rican Vaccine Trial data management system                                                            |
| CTA   | Clinical Trials Agreement                                                                                   |
| DCEG  | Division of Cancer Epidemiology and Genetics                                                                |
| DHHS  | Department of Health and Human Services                                                                     |
| DMC   | Data management center                                                                                      |
| DNA   | Deoxyribonucleic acid                                                                                       |
| DSMB  | Data and Safety Monitoring Board                                                                            |
| E6/E7 | Non-structural HPV proteins                                                                                 |
| EIA   | Enzyme Immunoassay                                                                                          |
| EISR  | Expedited Investigator Safety Report                                                                        |
| ELISA | Enzyme-linked immunoabsorbent assay                                                                         |
| EL.U  | ELISA Units                                                                                                 |
| ER    | Emergency Room                                                                                              |
| ES    | Initial Visit Eligibility Screener form                                                                     |
| EU/mL | ELISA Units per millilitre                                                                                  |
| FDA   | Food and Drug Administration                                                                                |
| FUNIN | Foundation for the Costa Rican Institute for Research and Training in Nutrition and Health                  |
| FWA   | Federal-wide assurance                                                                                      |
| GCP   | Good clinical practices                                                                                     |

**CONFIDENTIAL**

NCI Protocol # 04-C-N191; GSK Protocol # 580299/009 (HPV-009)

Amendment 5

|             |                                                                    |
|-------------|--------------------------------------------------------------------|
| GMP         | Good manufacturing practices                                       |
| GMT         | Geometric mean titer                                               |
| GSK         | GlaxoSmithKline                                                    |
| HAV         | Investigational formulation of Hepatitis A virus Havrix® vaccine   |
| HBsAg       | Hepatitis B surface antigen                                        |
| HCII        | Hybrid Capture® 2 test (Digene Corporation, Gaithersburg, MD, USA) |
| HLA         | Human leukocyte antigen                                            |
| HPV         | Human papillomavirus                                               |
| HSIL        | High-grade squamous intraepithelial lesion                         |
| HV2         | Home Visit Reactogenicity Monitoring form                          |
| IB          | Investigator Brochure                                              |
| ICD-10      | International Classification of Diseases – 10                      |
| ICF         | Informed Consent Form                                              |
| ICH         | International Conference on Harmonization                          |
| ID          | Identification                                                     |
| IEC         | Independent Ethics Committee                                       |
| IMS         | Information Management Services, Inc.                              |
| INCIENSA    | Costa Rican Institute for Research on Nutrition and Health         |
| IND         | Investigational New Drug Application                               |
| INDSR       | Investigation New Drug Safety Report (Amended: 29 Mar 2005)        |
| IRB         | Institutional Review Board                                         |
| ITT         | Intent to treat                                                    |
| kg          | Kilogram                                                           |
| L1 proteins | Papillomavirus structural proteins                                 |
| LBA         | Lineblot assay                                                     |

**CONFIDENTIAL**

NCI Protocol # 04-C-N191; GSK Protocol # 580299/009 (HPV-009)

Amendment 5

|         |                                                                                       |
|---------|---------------------------------------------------------------------------------------|
| LEEP    | Loop Electrosurgical Excisional Procedure                                             |
| LiPA    | Line probe assay                                                                      |
| LSIL    | Low-grade squamous intraepithelial lesion                                             |
| MA      | Massachusetts, USA                                                                    |
| MATLAB® | Matrix Laboratory (Mathworks, Inc.)                                                   |
| µg      | Microgram                                                                             |
| MD      | Maryland, USA or Doctor of Medicine                                                   |
| mg      | Milligram                                                                             |
| mL      | Milliliter                                                                            |
| mm      | Millimeter                                                                            |
| MPL®    | Monophosphoryl lipid A (Corixa Corporation, Seattle, Washington, USA [Formerly Ribi]) |
| MSDS    | Material Safety Data Sheet (Amended: 29 Mar 2005)                                     |
| NCI     | National Cancer Institute                                                             |
| NCSS    | Number Cruncher Statistical System                                                    |
| NIH     | National Institutes of Health                                                         |
| PASS    | Power analysis and sample size program                                                |
| PBMC    | Peripheral blood mononuclear cells                                                    |
| PCR     | Polymerase chain reaction                                                             |
| PES     | Post-Enrollment Eligibility Screener form                                             |
| PGMY    | PCR-based primers                                                                     |
| PI      | Principal Investigator                                                                |
| PLA     | Product License Application                                                           |
| POD     | Peroxidase                                                                            |
| QA      | Quality assurance                                                                     |

**CONFIDENTIAL**

NCI Protocol # 04-C-N191; GSK Protocol # 580299/009 (HPV-009)

Amendment 5

|           |                                                           |
|-----------|-----------------------------------------------------------|
| QC        | Quality control                                           |
| RBC       | Red blood cells                                           |
| RI        | Rhode Island, USA                                         |
| RNA       | Ribonucleic acid                                          |
| SAE       | Serious adverse event                                     |
| SAS       | Statistical Analysis System                               |
| SIL       | Squamous intraepithelial lesion                           |
| SOP       | Standard operating procedure                              |
| SPF       | PCR-based primers                                         |
| TMB       | Tetra methyl benzidine                                    |
| US or USA | United States of America                                  |
| UT        | Utah, USA                                                 |
| VAR       | Vaccine Administration and Reactogenicity Monitoring form |
| VLP       | Virus-like particle                                       |

**CONFIDENTIAL**

NCI Protocol # 04-C-N191; GSK Protocol # 580299/009 (HPV-009)  
Amendment 5

**Glossary of Terms**

|                         |                                                                                                                                                                                                                                                                                                                                                                                                                                            |
|-------------------------|--------------------------------------------------------------------------------------------------------------------------------------------------------------------------------------------------------------------------------------------------------------------------------------------------------------------------------------------------------------------------------------------------------------------------------------------|
| Adverse event           | <p>Any untoward medical occurrence in a patient or clinical investigation subject, temporally associated with the use of a medicinal product, whether or not considered related to the medicinal product.</p> <p>An AE can therefore be any unfavorable and unintended sign (including an abnormal laboratory finding), symptom, or disease (new or exacerbated) temporally associated with the use of a medicinal product.</p>            |
| Blinding                | <p>A procedure in which one or more parties to the trial are kept unaware of the treatment assignment in order to reduce the risk of biased study outcomes. When the subjects, the investigator, and the sponsor staff who are involved in the treatment or clinical evaluation of the subjects and review/analysis of data are unaware of the treatment assignments, as is the case for the present trial, the study is double blind.</p> |
| Eligible                | <p>Qualified for enrolment into the study based upon strict adherence to inclusion/exclusion criteria.</p>                                                                                                                                                                                                                                                                                                                                 |
| Evaluable               | <p>Meeting all eligibility criteria, complying with the procedures defined in the protocol, and, therefore, included in the according-to-protocol (ATP) analysis.</p>                                                                                                                                                                                                                                                                      |
| Investigational product | <p>A pharmaceutical form of an active ingredient or placebo being tested or used as a reference in a clinical trial, including a product with a marketing authorization when used in a way different from the approved form, or when used for an unapproved indication, or when used to gain further information about an approved use.</p>                                                                                                |
| Medical Monitor         | <p>An individual medically qualified to assume the responsibilities of the sponsor (GSK Biologicals) especially in regards to the ethics, clinical safety of a study and the assessment of adverse events.</p>                                                                                                                                                                                                                             |
| Protocol amendment      | <p>ICH defines a protocol amendment as “A written description of a change(s) to or formal clarification of a protocol.” This is further detailed to include a change to an approved protocol that affects the safety of subjects, scope of the investigation, study design, or scientific integrity of the study.</p>                                                                                                                      |

**CONFIDENTIAL**

NCI Protocol # 04-C-N191; GSK Protocol # 580299/009 (HPV-009)  
Amendment 5

|                                |                                                                                                                                                                                                                                                                |
|--------------------------------|----------------------------------------------------------------------------------------------------------------------------------------------------------------------------------------------------------------------------------------------------------------|
| Protocol administrative change | A protocol administrative change addresses changes to only logistical or administrative aspects of the study. N.B. Any change that falls under the definition of a protocol amendment (see definition above) must be prepared as an amendment to the protocol. |
| Randomization                  | Process of random attribution of treatment to subjects in order to reduce bias of selection.                                                                                                                                                                   |
| Solicited adverse event        | Adverse events (AEs) to be recorded as endpoints in the clinical study. The presence/occurrence/intensity of these events is actively solicited from the subject or an observer during a specified post-vaccination follow-up period.                          |
| Subject                        | Term used throughout the protocol to denote an individual that has been contacted in order to participate in the clinical study, either as a recipient of the investigational product(s) or as a control.                                                      |
| Unsolicited adverse event      | Any adverse event (AE) reported in addition to those solicited during the clinical study. Also any "solicited" symptom with onset outside the specified period of follow-up for solicited symptoms will be reported as an unsolicited adverse event.           |

**TABLE OF CONTENTS**

|                                                                                                  | <b>PAGE</b> |
|--------------------------------------------------------------------------------------------------|-------------|
| SYNOPSIS.....                                                                                    | 16          |
| 1. INTRODUCTION.....                                                                             | 22          |
| 1.1. Background .....                                                                            | 22          |
| 1.2. The Need for an HPV Vaccine .....                                                           | 25          |
| 1.3. Defining Cervical Abnormalities .....                                                       | 25          |
| 1.4. Summary .....                                                                               | 26          |
| 2. STUDY OBJECTIVES.....                                                                         | 27          |
| 2.1. Primary Objective .....                                                                     | 27          |
| 2.2. Secondary Objectives.....                                                                   | 27          |
| 2.3. Tertiary Objectives.....                                                                    | 28          |
| 2.4. Ancillary Analyses & Studies.....                                                           | 29          |
| 3. METHODS.....                                                                                  | 29          |
| 3.1. Overview of the Trial.....                                                                  | 29          |
| 3.2. Study Population.....                                                                       | 37          |
| 3.3. Eligibility Criteria .....                                                                  | 37          |
| 3.3.1. Inclusion Criteria .....                                                                  | 37          |
| 3.3.2. Exclusion Criteria .....                                                                  | 38          |
| 3.3.3. Deferral Criteria .....                                                                   | 40          |
| 3.3.4. Elimination criteria from the ATP analyses during the<br>study.....                       | 41          |
| 3.4. Contraindications to Subsequent Vaccination .....                                           | 41          |
| 3.5. Trial Arms & Randomization .....                                                            | 42          |
| 3.6. Study Vaccines .....                                                                        | 43          |
| 3.7. Selection of an Investigational Formulation of <i>Havrix</i> as the Control<br>Vaccine..... | 44          |
| 3.8. Central Storage of Vaccine .....                                                            | 45          |
| 3.9. Concomitant Medications/Vaccination .....                                                   | 46          |
| 3.10. Vaccination Route and Schedule .....                                                       | 46          |
| 3.11. Clinic Visits During Vaccination Phase (0, 1, 6, & 7 months).....                          | 46          |
| 3.12. Active Follow-up of Participants (Months 12-48).....                                       | 48          |
| 3.13. Trial Endpoints.....                                                                       | 49          |
| 3.13.1. Primary Endpoint .....                                                                   | 49          |
| 3.13.2. Secondary Endpoints.....                                                                 | 49          |
| 3.13.3. Tertiary and Exploratory Endpoints (Amended: 13 Nov<br>2008) .....                       | 51          |
| 3.14. Adverse Events Monitoring .....                                                            | 51          |
| 3.15. Clinical Procedures.....                                                                   | 54          |
| 3.15.1. Overview.....                                                                            | 54          |
| 3.16. Enrollment Physical Examination.....                                                       | 54          |
| 3.16.1. Pelvic Examinations.....                                                                 | 55          |
| 3.16.2. Referral for Colposcopic Evaluation .....                                                | 56          |
| 3.16.3. Exiting Women from the Trial (Amended: 13 Nov 2008) .....                                | 56          |
| 3.17. Other Procedures and Data Collection.....                                                  | 57          |
| 3.17.1. Overview.....                                                                            | 57          |

**CONFIDENTIAL**

NCI Protocol # 04-C-N191; GSK Protocol # 580299/009 (HPV-009)

Amendment 5

- 3.17.2. Interview Questionnaires ..... 58
- 3.17.3. Blood Collection..... 58
- 3.17.4. Extra-Cervical Collection..... 59
- 3.18. Biospecimen Processing, Storage, & Shipment ..... 60
- 3.19. Laboratory Tests..... 61
  - 3.19.1. Cytology..... 61
  - 3.19.2. Histology..... 62
  - 3.19.3. PCR typing of HPV DNA from *PreservCyt* specimens ..... 63
  - 3.19.4. PCR typing of HPV DNA from histopathological specimens ..... 64
  - 3.19.5. HPV DNA Testing by *Hybrid Capture 2* (HCII) ..... 64
  - 3.19.6. Chlamydia trachomatis & Neisseria gonorrhoeae Testing (Hybrid Capture 2, HCII) ..... 65
  - 3.19.7. Serology Testing by ELISA ..... 65
  - 3.19.8. V5/J4 Monoclonal Inhibition Enzyme Immunoassay (EIA) Antibodies on a Subset of Subjects ..... 66
  - 3.19.9. Other Assays ..... 66
- 3.20. Efforts to Maximize Participation/Retention ..... 66
- 4. STATISTICAL ANALYSIS PLAN & POWER ..... 67
  - 4.1. Overview..... 67
  - 4.2. Primary Analysis for Efficacy..... 69
    - 4.2.1. Baseline Characteristics ..... 69
    - 4.2.2. Exclusion from Analysis Based on Pre-Enrollment Testing ..... 70
    - 4.2.3. According to Protocol (ATP) Analysis ..... 70
    - 4.2.4. Intent to Treat (ITT) Analysis..... 70
  - 4.3. Secondary Analyses for Efficacy..... 70
    - 4.3.1. Duration of Protection ..... 70
    - 4.3.2. Protection against Any Oncogenic HPV Types ..... 71
    - 4.3.3. Protection against HPV16 or HPV18 Associated CIN2+ Among Women with no Evidence of Exposure to HPV16 or HPV18 at Entry ..... 71
    - 4.3.4. Protection against Persistent HPV16 or HPV18 Infection..... 71
    - 4.3.5. Vaccine Immunogenicity ..... 71
  - 4.4. Evaluation of Adverse Events (AEs) ..... 71
  - 4.5. Other Analyses ..... 73
  - 4.6. Interim Analysis ..... 73
  - 4.7. Power to Determine Vaccine Efficacy ..... 74
- 5. OVERSIGHT BY THE DATA AND SAFETY MONITORING BOARD & ADVISORY BOARD ..... 77
- 6. HUMAN SUBJECTS PROTECTION ..... 78
- 7. VACCINE MANUFACTURING & QUALITY CONTROL ..... 80
- 8. COLLABORATORS AND CONSULTANTS..... 81
- 9. PROJECTED TIMETABLE..... 82
- 10. REFERENCES..... 83
- 11. APPENDICES ..... 87



**LIST OF APPENDICES**

|            | <b>PAGE</b>                                                                                                                  |
|------------|------------------------------------------------------------------------------------------------------------------------------|
| Appendix A | CLINICAL MANAGEMENT ALGORITHMS ..... 88                                                                                      |
| Appendix B | RANDOMIZATION PROCEDURES ..... 93                                                                                            |
| Appendix C | HPV PCR TESTING ALGORITHM FOR HPV16 & HPV18<br>DETERMINATION ..... 95                                                        |
| Appendix D | CRITERIA FOR DEFINING ADVERSE EVENTS (AEs),<br>SERIOUS AEs (SAEs), AND PROCEDURES FOR AND TIMING<br>OF AE REPORTING ..... 96 |
| Appendix E | HPV16/18 VLP & HAVRIX MSDSs..... 110                                                                                         |
| Appendix F | PROTOCOL AMENDMENTS AND MODIFICATIONS ..... 124                                                                              |

**LIST OF TABLES**

|         | <b>PAGE</b>                                                                                                 |
|---------|-------------------------------------------------------------------------------------------------------------|
| Table 1 | Expected Trial Sample Size (Amended: 13 Nov 2008)..... 31                                                   |
| Table 2 | Timeline of Costa Rican HPV16/18 VLP Vaccine Trial Activities<br>(Amended: 13 Nov 2008) ..... 33            |
| Table 3 | Vaccine Dosage and Administration..... 46                                                                   |
| Table 4 | Intervals Between Study Visits (Amended: 13 Nov 2008)..... 47                                               |
| Table 5 | Types of Biological Specimens Proposed and Expected Storage<br>Requirements (Amended: 13 Nov 2008) ..... 60 |
| Table 6 | Power to Determine Vaccine Efficacy in the Costa Rican Trial ..... 76                                       |

**LIST OF FIGURES**

|                                                                                                        | <b>PAGE</b> |
|--------------------------------------------------------------------------------------------------------|-------------|
| Figure 1      The Cervical Cancer Continuum .....                                                      | 23          |
| Figure 2      Diagrammatic Overview of the Costa Rican HPV16/18 VLP<br>Vaccine Trial .....             | 32          |
| Figure 3      Expedited Reporting – Personnel Communication Flow Chart<br>(Amended: 13 Nov 2008) ..... | 109         |

**CONFIDENTIAL**

NCI Protocol # 04-C-N191; GSK Protocol # 580299/009 (HPV-009)  
Amendment 5

## SYNOPSIS

**Title** A double blind, controlled, randomized, phase III study of the efficacy of an HPV16/18 VLP vaccine in the prevention of advanced cervical intraepithelial neoplasia (CIN2, CIN3, AIS, and invasive cervical cancer) associated with HPV16 or HPV18 cervical infection in healthy young adult women in Costa Rica

**Study population** Healthy young adult women between and including 18-25 years of age at the time of first vaccination

**Rationale** Cervical cancer is one of the most common cancers among women worldwide. Approximately 400,000 new cases are diagnosed each year, resulting in about 200,000 deaths. Cervical infection with one of a dozen or so oncogenic human papillomavirus (HPV) types is now known to be the cause of nearly all cervical tumors, with a single HPV type, HPV16, accounting for approximately half of the cases worldwide and an additional type, HPV18 accounting for an additional 10-20% of cases.

Although cytological screening programs have been in place for several decades, these programs have not been effective at controlling cervical cancer in developing countries, where the vast majority of cervical cancer cases are diagnosed. In developed countries such as the United States, where screening programs have been successful, the costs associated with screening and subsequent colposcopic evaluation and treatment are very high (>\$5 billion annually). An effective vaccine against HPV, the virus that causes cervical cancer, is needed.

Pre-clinical studies have convincingly demonstrated the potential prophylactic efficacy of virus-like particle (VLP) based HPV vaccines discovered at the National Cancer Institute (NCI). The efficacy of the VLP-based vaccines in animal trials has been shown to be due to their correct three-dimensional conformation and to their ability to induce strong neutralizing antibody responses. Human safety and immunogenicity trials conducted in the United States and elsewhere have suggested that VLP-based vaccines are safe and that they induce a strong immune response. Recent data further indicate that vaccination with VLP-based HPV vaccines protects against persistent HPV infections [Koutsky, 2002].

Based on these promising findings, the NCI and the Foundation for the Costa Rican Institute for Research and Training in Nutrition and Health (FUNIN) plan to conduct a double-blinded, controlled phase III pivotal efficacy trial in Guanacaste, Costa Rica, to evaluate the prophylactic efficacy of the HPV16/18 L1 papillomavirus structural protein VLP-based vaccine manufactured and developed by GlaxoSmithKline (GSK) Biologicals/MedImmune Inc. The vaccine is formulated with investigational adjuvant AS04 (previously SBAS4) comprised of aluminum hydroxide (Al(OH)<sub>3</sub>) and monophosphoryl lipid A (MPL®).

**CONFIDENTIAL**

NCI Protocol # 04-C-N191; GSK Protocol # 580299/009 (HPV-009)  
Amendment 5

**Rationale  
(continued)**

The trial will enroll approximately 15,000 healthy young women ages 18-25 that will be randomly assigned to one of two arms. Participants will be vaccinated three times intramuscularly over a six month period (i.e., at 0, 1, and 6 months) with a 40 µg dose of the HPV16/18 L1 VLP vaccine or with 720 enzyme-linked immunoabsorbent assay (ELISA) units of GSK Biologicals' (Amended: 29 Mar 2005) hepatitis A vaccine, inactivated (Havrix®) prepared as an investigational formulation. Each woman will be followed with yearly clinic visits and pelvic exams for four years to obtain information on long-term adverse events (AEs) and to determine whether vaccination protects against the development of incident, histopathologically confirmed cervical intraepithelial neoplasia (CIN) 2+ (defined as advanced cervical intraepithelial neoplasia that includes CIN2, CIN3, adenocarcinoma *in situ* [AIS], and invasive cervical cancer) associated with HPV16 or HPV18 cervical infections. The six secondary objectives of this trial are listed below. In keeping with the mission of NCI to produce hypothesis-generating data, numerous exploratory tertiary objectives and ancillary studies are also planned.

**Objectives**

**Primary**

To demonstrate efficacy of the candidate vaccine compared with control in the prevention of histopathologically confirmed CIN2+ associated with an HPV16 or HPV18 cervical infection post dose 3 (from Month 6 to Month 48), in young adult women negative for HPV deoxyribonucleic acid (DNA) by polymerase chain reaction (PCR) at Months 0 and 6 for the corresponding HPV type.

CIN2+ is defined as CIN2, CIN3, AIS, or invasive cervical cancer.

**Secondary**

1. To evaluate the safety of the candidate vaccine in young adult women in the entire randomized cohort, regardless of their initial HPV16/18 DNA (by PCR) status, and also stratified according to initial status. This will be done by strict monitoring and documentation of adverse events.
2. To evaluate the duration of protection conferred by the candidate vaccine against cervical infection with HPV16 or HPV18 post dose 3 (from Month 6 to Month 48), in young adult women negative for HPV DNA (by PCR) at Months 0 and 6 for the corresponding HPV type.
3. To evaluate the efficacy of the candidate vaccine compared with control in the prevention of CIN2+ associated with cervical infection by any oncogenic HPV type, post dose 3 (from Month 6 to Month 48), in young adult women negative for HPV DNA (by PCR) at Months 0 and 6 for the corresponding HPV type.

CIN2+ is defined as CIN2, CIN3, AIS, or invasive cervical cancer.

4. To evaluate the efficacy of the candidate vaccine compared with control in the prevention of histopathologically confirmed CIN2+ associated with an HPV16 or HPV18 cervical infection post dose 3 (from Month 6 to Month 48) detected within the lesional component of the cervical tissue specimen by PCR, in young adult women negative for HPV DNA (by PCR) at Months 0 and 6 for the corresponding HPV type and seronegative by ELISA at Month 0 for the corresponding HPV type.

CIN2+ is defined as CIN2, CIN3, AIS, or invasive cervical cancer.

**CONFIDENTIAL**

NCI Protocol # 04-C-N191; GSK Protocol # 580299/009 (HPV-009)

Amendment 5

**Objectives  
(continued)**

5. To evaluate the efficacy of the candidate vaccine compared with control in the prevention of persistent HPV16 or HPV18 cervical infection post dose 3 (from Month 6 to Month 48), in uninfected young adult women negative for HPV DNA (by PCR) at Months 0 and 6 for the corresponding HPV type.

Persistent HPV16 or HPV18 cervical infection is defined as detection of the same HPV type (by PCR) in cervical samples from all consecutive evaluations over approximately 12 months.

6. To evaluate the vaccine immunogenicity (by ELISA and V5/J4 monoclonal antibody inhibition enzyme immunoassay [EIA]) in a subcohort of (Amended: 19 May 2006) 600 subjects enrolled.

**Study Design**

**Experimental design:** Phase III, single center study, active control, with two parallel groups

**Study site:** Single center with up to five satellite sites. Sites located in one region of Costa Rica (Guanacaste Province and adjacent areas, population ~300,000)

**Enrollment:** Population-based, ages 18-25, N= ~15,000 (of ~20,000 who will be invited, based on 2000 census data). Randomization of 7,500 women will provide a sufficient study size to evaluate the main trial objectives. (Amended: 13 Nov 2008). The expected enrollment period is 18 (Amended: 31 Oct 2005) months.

**Treatment allocation:** Randomized (1:1); randomization via sequential numbering of vaccines

**Blinding:** Double-blind

**Treatment groups:** Two groups

- **Vaccine:** 40 µg HPV16/18 VLPs/50 µg MPL®/500 µg aluminum as Al(OH)<sub>3</sub>
- **Control:** Investigational formulation of Havrix® (Hepatitis A Vaccine, Inactivated; Manufactured by GlaxoSmithKline Biologicals, Rixensart, Belgium) [720 ELISA units of antigen; 500 µg Al(OH)<sub>3</sub>]

**Study visits:** Average of seven scheduled study visits per subject (8 scheduled visits per subject in the immunogenicity cohort)

**Vaccination schedule:** Three doses of control or vaccine administered on a 0, 1, 6-month schedule

**Cytologic assessments:** Cervical liquid-based cytology evaluations at Month 0, 12, 24, 36 and 48

**HPV assessments:** HPV DNA assessments on cervical cell suspensions collected for cytology at Months 0, 12, 24, 36, and 48. In addition, there will be HPV DNA assessments on cervical cell suspensions collected for cytology at 6 monthly intervals in those women who are being followed for abnormal cytology (see next bullet point). Moreover, all subjects will submit a self-collected cervicovaginal sample at Month 6.

**CONFIDENTIAL**

NCI Protocol # 04-C-N191; GSK Protocol # 580299/009 (HPV-009)

Amendment 5

**Study Design  
(continued)**

**Management of women with abnormal cytology:** Women detected as having evidence of a low-grade squamous intraepithelial lesion (LSIL) (regardless of HPV testing results) or atypical squamous cells of undetermined significance (ASC-US) concomitant with detection of an oncogenic HPV type by Hybrid Capture II (HCII) will have cytology performed at 6 monthly intervals (rather than yearly intervals). Those whose ASC-US/oncogenic HPV positive lesion or LSIL persists for 2 evaluations (whether consecutive or intermittent) will be referred for colposcopy for evaluation and excisional treatment, if warranted. Those with 3 consecutive normal cytology evaluations will return to an annual cytology evaluation schedule. For purposes of this management strategy, women with ASC-US whose concomitant specimen tests negative for HPV will be considered normal and followed at annual intervals.

Women detected as having evidence of a high-grade squamous intraepithelial lesion (HSIL), atypical glandular cells (endocervical, endometrial, or glandular; favor neoplastic or not otherwise specified) (AGC), atypical squamous cells, cannot exclude HSIL (ASC-H), or cancer will be immediately referred for colposcopic evaluation and excisional treatment, if warranted.

At the Month 48 visit we will apply the same criteria applied throughout the trial to define women who require colposcopic evaluation. Specifically, all women with evidence of cancer, HSIL, glandular lesions, ASC-H, or persistent ASC-US+/LSIL will be referred to colposcopy. Close-out of individual study participants will only occur after colposcopy referral, for women who require such referral.

It should be noted, that after participant close-out, participants will be offered additional clinical care if needed. Case management after study close-out will be defined under a separate protocol. (Amended: 13 Nov 2008)

**Safety assessments:**

- In all subjects during the 60-minute (Amended: 31 Oct 2005) post-vaccination period, solicited local AEs (pain, redness, swelling and temperature at the injection site) and solicited general AEs with new onset or aggravation since vaccination (fever, fatigue, myalgia, arthralgia, gastrointestinal symptoms, headache, rash [other than urticaria] and urticaria) will be assessed.
- In 10% of subjects randomly selected, on one day from Day 3 to Day 6 post-vaccination (day of vaccination is Day 0), local and solicited general AEs will be collected during a home visit.
- In all subjects, non-serious AEs that are reported spontaneously or through solicitation at every study visit will be collected throughout the trial.
- In all subjects, serious adverse events (SAEs) and pregnancy outcomes will be collected throughout the trial.

**Study Design  
(continued)**

**Immunogenicity subcohort:** A subcohort (Amended: 19 May 2006) of 600 subjects enrolled, regardless of the study site at which they are enrolled, will have blood samples taken at Months 0, 6, 7, 12, 24, 36 and 48 for immunogenicity assessments. The immunogenicity subcohort will be comprised of these 600 subjects.

Note: All other (Amended: 19 May 2006) subjects enrolled will have blood drawn at Months 0, 6, 12, 24, 36, and 48 (and at Months 18, 30, and 42 if seen at those time intervals) to allow exploratory analyses and ancillary studies by NCI.

**Type of study:** Self-contained, Investigational New Drug (IND).

**Data collection:** Conventional (paper) case report form (CRF). In most instances

**CONFIDENTIAL**

NCI Protocol # 04-C-N191; GSK Protocol # 580299/009 (HPV-009)  
Amendment 5

the CRF will act as a source document.

**Duration of the study:** A total of 48 months of follow-up per subject is planned for all subjects. Although participants will each be followed for 48 months, final analysis of CIN2+ will be triggered when one of the following set of conditions is met:

- 48 months of follow-up per participant is achieved, or
- At least 30 confirmed cases of CIN2+ associated with HPV16 or HPV18 cervical infection that are eligible for the ATP analysis are observed and the last woman recruited into the study has completed a minimum follow-up period of two years, pending review and approval of the final statistical analysis plan by the DSMB. (Amended: 29 Mar 2005)

Total enrollment was 7,466, which is lower than initial estimates. The final accrual of 7,466 provides 91% power to detect a vaccine efficacy of 80% for the outcome of CIN2+. (Amended: 13 Nov 2008)

- Should analysis occur prior to completion of 48 months of follow-up (under the second scenario above), subjects will continue to be followed for the full 48 months and an annex report will be issued to describe any additional data collected.

**Number of Subjects**

Target 15,000 subjects enrolled and randomly assigned to one of two arms, 7,500 per group (vaccine/control). 13,000 subjects are expected to be evaluable for the primary According to Protocol (ATP) analysis (6,500 evaluable subjects per group).

**Endpoints**

**Primary**

Histopathologically confirmed CIN2+ associated with HPV16 or HPV18 infection detected by PCR in the preceding cervical cytology specimen in young adult women negative for HPV DNA by PCR at Months 0 and 6 for the corresponding HPV type.

CIN2+ is defined as CIN2, CIN3, AIS or invasive cervical cancer.

Preceding cervical cytology means the last cervical cytology specimen collected before the histopathology specimen was obtained.

**Secondary**

1. Safety
  - Occurrence and intensity of solicited local AEs and occurrence (either onset or aggravation) of solicited general AEs including urticaria within 60 (Amended: 31 Oct 2005) minutes after vaccination.
  - Occurrence and intensity of solicited local AEs and solicited general AEs on a 10% random subset of participants on one day from Day 3 to Day 6.
  - after each vaccination and over all vaccinations combined.
  - Occurrence of unsolicited AEs and SAEs throughout the entire study (Month 0 up to Month 48).
  - Outcome of all pregnancies.
2. Time to occurrence of incident cervical infection with HPV16 or HPV18 (by PCR).
3. Histopathologically confirmed CIN2+ associated with infection by any oncogenic HPV type (including HPV types 16, 18, 31, 33, 35, 39, 45, 51, 52, 56, 58, 59, 66, and 68), detected by PCR in the preceding cervical

**CONFIDENTIAL**

NCI Protocol # 04-C-N191; GSK Protocol # 580299/009 (HPV-009)

Amendment 5

cytology specimen in young adult women negative for HPV DNA (by PCR) at Months 0 and 6 for the corresponding HPV type.

4. Histopathologically confirmed CIN2+ associated with HPV16 or HPV18 infection detected by PCR within the lesional component of the cervical tissue specimen in young adult women negative for HPV DNA (by PCR) at Months 0 and 6 for the corresponding HPV type and seronegative by ELISA at Month 0 for the corresponding HPV type.
5. Persistent HPV16 or HPV18 cervical infection, defined as detection of the same HPV type (by PCR) in cervical samples from all consecutive evaluations over approximately 12 months from Month 6 to Month 48.

(Another way of describing this endpoint is when a subject has 2 or more cervical cytology specimens positive for the same HPV type, either HPV16 or HPV18, over an approximately 12-month period without any intervening negative specimen. The term approximately is used because ATP visit intervals may vary as shown in [Table 4](#) in Section 3.11).

6. HPV16 and HPV18 ELISA and V5/J4 monoclonal antibody inhibition EIA titers in the 600 subjects enrolled into the immunogenicity subcohort. (Amended: 19 May 2006)



## 1. INTRODUCTION

### 1.1. Background

DCEG has a longstanding interest in studies of HPV and cervical neoplasia. In the 1980's two case-control studies were conducted, one in the United States and one in Latin America, to examine risk factors associated with cervical cancer. The Latin American study was the first large-scale epidemiological study to demonstrate an association between HPV infection and cervical cancer [Reeves, 1989]. Subsequently, three cohort studies (two in the United States and one in Costa Rica) were established to examine the natural history of HPV and cervical neoplasia [Schiffman, 1993, Herrero, 2000, The Atypical Squamous Cells of Undetermined Significance/Low-Grade Squamous Intraepithelial Lesions Triage Study (ALTS) Group, 2000]. These studies have jointly provided critical data linking HPV infection to the development of cervical cancer and its precursor lesions (known cytologically as LSIL for low-grade squamous intraepithelial lesions and HSIL for high-grade SIL; and known histopathologically as condyloma and CIN1-3 for cervical intraepithelial neoplasia grades 1-3 – see Figure 1). In fact, it is now understood that LSIL is the cytological manifestation of HPV infection [Schiffman, 1998]. It is also known that while the majority of HPV infections are self-limited, persistent infection with one of about 15 oncogenic HPV types is required for the development of nearly all cases of cervical cancer and its immediate precursor, HSIL [Herrero, 2000, Munoz, 2003, Bosch, 1995]. HPV16 is the most important type, accounting for about half of all cancer cases, while HPV18 accounts for another 10-20% of all cases [Bosch, 1995]. Available evidence suggests that infections with different HPV types are independent and that infection with one type does not modulate infections with other HPV types [Herrero, 2000, Liaw, 2001]. Prevention of CIN and cervical cancer (one of the most common cancers among women worldwide) is therefore theoretically possible via prevention of oncogenic HPV infection and/or its associated disease.

One of the cohort studies sponsored by DCEG is being conducted in Guanacaste, Costa Rica, among 10,000 adult women [Herrero, 2000, Herrero, 1997, Schiffman, 1999]. Started in 1993, this population-based cohort was designed to elucidate the origins of HSIL and cervical cancer. Response rates during the enrollment phase of this study were 93% and over the past seven years close to 95% of women selected for active follow-up have continued to participate. This makes it an attractive region in which to evaluate the efficacy of a vaccine developed to prevent HPV infection and SIL, not only because of the high compliance of this rural population, but also because of the high rates of cervical neoplasia in Guanacaste (despite rates of HPV infection comparable to those in the US – a phenomenon likely due to differences between the two countries in screening frequency and quality) and our understanding of the expected distribution and rates of HPV infections and cervical neoplasia.

Figure 1 The Cervical Cancer Continuum

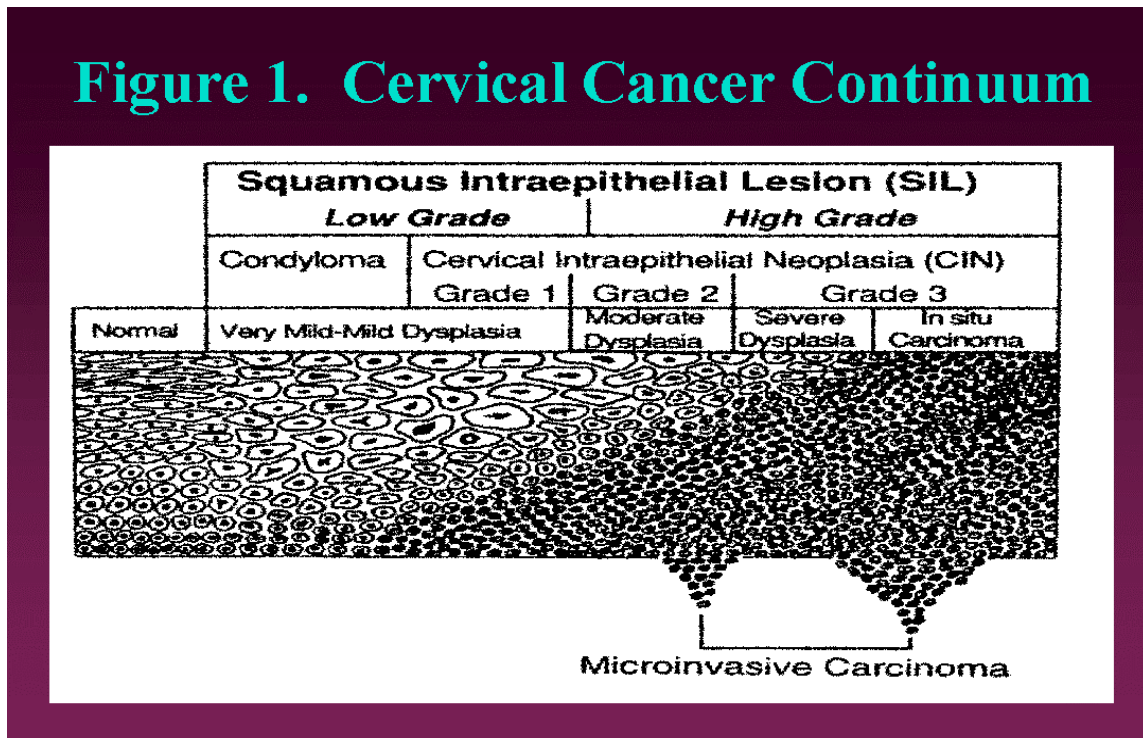

In parallel with the epidemiological work conducted by DCEG in the 1980's and 90's, investigators in the Center for Cancer Research (CCR) at NCI developed an *in vitro* method to produce papillomavirus structural proteins (L1 proteins) capable of self-assembling into viral particles (called L1 virus-like particles or L1 VLPs) [Kimbauer, 1994]. These particles consist of the outer coat of the virus in its correct three-dimensional configuration but are free of nucleic acids and are therefore noninfectious. When used as vaccines in animal studies, L1 VLPs were shown to induce high levels of neutralizing antibodies against the papillomavirus L1 structural protein and to protect against direct experimental challenge with the virus [Breitburd, 1995, Kimbauer, 1996, Suzich, 1995]. It has further been demonstrated that protective antibody levels are seen for at least one year following vaccination and that systemic inoculation induces not only circulating antibodies but also antibodies in the genital tract [Christensen, 1996, Lowe, 1997]. There are currently three animal models (rabbits, cattle, and dogs) supporting a prophylactic effect of vaccination with papillomavirus L1 VLP. VLP antibody-mediated protection from infection was type-specific both in the animal vaccine studies and in *in vitro* assays using HPV VLPs.

Based on these initial pre-clinical studies, safety and immunogenicity studies were initiated in humans. To date, over 3,000 individuals in the United States, Brazil and elsewhere have been vaccinated with a VLP-based vaccine, with very promising results. VLP-based vaccines manufactured by three groups have been tested in humans. These include an HPV16 L1 VLP vaccine manufactured by Novavax, Inc. under contract with the NCI, HPV16 and HPV6/11/16/18 L1 VLP vaccines manufactured by Merck Pharmaceuticals, and HPV11 and HPV16/18 L1 VLP vaccines manufactured by MedImmune, in partnership with GlaxoSmithKline (GSK) Biologicals. HPV16 has been

**CONFIDENTIAL**

NCI Protocol # 04-C-N191; GSK Protocol # 580299/009 (HPV-009)  
Amendment 5

the primary target of these vaccines since it is known to be associated with half of all cervical cancer cases detected worldwide. HPV18, the other oncogenic HPV type included in some of the vaccines tested to date accounts for an additional 10-20% of cervical cancer cases worldwide. HPV types 6 and 11 are non-oncogenic HPV types that are responsible for genital warts. The presence of these two types should not impact cervical cancer rates.

Without exception, results from early phase human trials have indicated that VLP-based vaccines are well tolerated and that they induce high levels of neutralizing antibodies [Koutsky, 2002, Harro, 2001, Evans, 2001]. Antibodies have been detected both systemically and in the genital tract of vaccinated women [Nardelli-Haeffliger, 2003]. Furthermore, initial results from a phase IIb trial of an HPV16 VLP vaccine conducted by Merck Pharmaceuticals has recently demonstrated that vaccination effectively protects against 6 month persistent infection with HPV16 with a high level of efficacy [Koutsky, 2002]. Results from a recently completed Phase IIb trial conducted by GSK Biologicals confirm the finding and extend it to HPV18. (Amended: 29 Mar 2005) Although these results are very promising, data showing protection against the development of cervical cancer precursor lesions (known as HSIL cytologically and CIN2-3 histopathologically) is needed.

The NCI initially tested an HPV16 VLP vaccine manufactured under contract by Novavax, Inc. but found scale-up of vaccine manufacturing under GMP conditions not to be feasible in a timely manner. Also, the vaccines manufactured by the larger pharmaceutical companies contained two oncogenic HPV types (HPV16 and HPV18) and were therefore likely to be superior to the monovalent vaccine being manufactured by Novavax, Inc. GSK Biologicals has agreed to provide their bivalent HPV16/18 VLP vaccine under a Clinical Trials Agreement with NCI, and we therefore plan to test this vaccine in the Costa Rican efficacy trial.

Safety and immunogenicity results from early phase trials of the HPV16/18 VLP vaccine manufactured by MedImmune/GSK Biologicals are described in the Investigator Brochure provided under separate cover (Investigator Brochure for the Candidate Prophylactic HPV16/18 VLP Vaccine Formulated with AS04, GSK-580299). Phase I and II studies have been conducted under the supervision of the US FDA to investigate the safety, reactogenicity, and immunogenicity of the HPV16/18 VLP vaccine candidate. In these trials, over 700 healthy women received at least one dose of the HPV16/18 VLP vaccine. The antigen concentration and adjuvant for the vaccine formulation advanced to phase III development was selected mainly based on these clinical studies. In summary, the vaccine at all antigen concentrations and formulations (with or without various adjuvants), when administered as 3 doses over 6 months, was well-tolerated and induced potent immune responses, measured as neutralizing antibodies against HPV16 and HPV18. A formulation containing 20 µg of each of the two HPV types (40 µg total) plus the adjuvants aluminum hydroxide (Al(OH)<sub>3</sub>) and 3-deacylated monophosphoryl lipid A (MPL®) (in combination designated AS04) elicited the highest geometric mean titers of virus-specific antibody while retaining a favorable reactogenicity profile. This vaccine candidate was used in a recently completed phase IIb trial and will be used in the Costa Rican phase III efficacy trial.

## CONFIDENTIAL

NCI Protocol # 04-C-N191; GSK Protocol # 580299/009 (HPV-009)  
Amendment 5

As indicated above, the candidate HPV16/18 VLP vaccine that will be used in our trial is formulated with an investigational adjuvant (AS04). AS04 is an adjuvant that is not used in any licensed vaccines. Nevertheless, GSK Biologicals has compiled considerable information regarding its safety during clinical trials of other vaccines. The information in this section reflects knowledge that was current at the time of study start. Please refer to the most recent edition of the Investigator Brochure for a review of clinical and pre-clinical studies (Amended: 13 Nov 2008).

### 1.2. The Need for an HPV Vaccine

Cervical cancer is the second or third most common female tumor worldwide [Parkin, 1999]. In many developing countries, where rates are highest, cervical cancer is the most common malignancy diagnosed among women. Over 400,000 new cases of cervical cancer are diagnosed each year, resulting in approximately 200,000 deaths. While Pap smear screening programs in developed nations have been shown to be effective at reducing the incidence of invasive cervical cancer, difficulties remain in providing underserved populations within these developed countries with access to routine cytological screening programs. Also, in developing countries, it has proven difficult to implement effective screening programs despite numerous attempts over the past 30+ years. In Costa Rica, for example, rates of disease have remained high despite screening of approximately 80% of adult women in the country [Herrero, 1993]. Furthermore, even in developed nations, where cervical cancer rates have dropped significantly since Pap smear screening programs were implemented, the cost associated with these efforts is large. As an example, in the United States, the cost associated with Pap smear screening and subsequent colposcopic follow-up and treatment is greater than five billion dollars annually [Kurman, 1994]. An effective HPV vaccine could, in the long run, prove to be a more effective way to reduce cervical cancer incidence and mortality in developing countries, and also to reduce the costs associated with cervical cancer prevention efforts in the United States and other developed and industrialized nations.

### 1.3. Defining Cervical Abnormalities

Before describing the proposed efficacy trial itself, it is important that we carefully define the terminology used to classify women with respect to degree of cervical abnormality. Based on our understanding of the natural history of cervical cancer, we know that cervical cancer begins with infection with one of about 15 oncogenic HPV types [Munoz, 2003, IARC Working Group on the Evaluation of Carcinogenic Risks to Humans, 1995]. As mentioned above, most of these HPV infections are transient but a small proportion of infections persist and are at risk of progressing to more severe disease [Hildesheim, 1994, Ho, 1995, Nobbenhuis, 1999].

Using the latest cytological Bethesda 2001 classification system [Solomon, 2002], the first unequivocal cytological evidence of HPV infection is called LSIL (low-grade squamous intraepithelial lesions). Careful studies have demonstrated that 85+% of LSIL lesions are HPV positive for oncogenic types, and so while there may be a small subset of LSIL diagnoses that represent “look-a-likes”, the vast majority of LSIL lesions represent true HPV-related disease [The Atypical Squamous Cells of Undetermined

Significance/Low-Grade Squamous Intraepithelial Lesions Triage Study (ALTS) Group, 2000].

In addition to these LSIL lesions, equivocal lesions (called ASC-US for atypical squamous cells of undetermined significance) are commonly diagnosed. It is now possible to classify ASC-US lesions into the benign reactive atypias or true SILs by using oncogenic HPV testing [Solomon, 2001].

Persistent oncogenic HPV infections can progress to more worrisome high-grade disease known as high-grade squamous intraepithelial lesions (HSIL), usually within a period of many years (5-10 years, on average) [IARC Working Group on the Evaluation of Carcinogenic Risks to Humans, 1995]. HSIL, a cytological diagnosis, comprises the histopathological diagnoses of CIN2 and CIN3. These lesions are often, but not always, preceded by abnormal cytology [IARC Working Group on the Evaluation of Carcinogenic Risks to Humans, 1995, Koutsky, 1992]. These high-grade lesions, which include carcinoma *in situ* (CIS), are the immediate precursors to cervical cancer.

Based on this understanding of the natural history of cervical cancer, we propose to use the following cytological classification to guide clinical management of participants in our trial:

1. Normal: Normal cytology (including benign reactive changes) or atypical squamous cells of undetermined significance (ASC-US) that tests negative for oncogenic HPV types.
2. ASC-US+/LSIL: LSIL by cytology or ASC-US that tests positive for oncogenic HPV types.
3. HSIL: HSIL by cytology. Atypical squamous cells, cannot exclude HSIL (ASC-H) will be included in this group due to their high risk of underlying HSIL. Atypical glandular cells (AGC) and AIS, rare forms of cervical glandular abnormalities, will also be included in this group due to their high risk of progression.
4. Cancer: Cancer by cytology (very few, if any, cancers are expected in our cohort of young women).

Additional details regarding our clinical management plan are provided in Section 3.15

For purposes of defining endpoints for our primary and secondary analyses, histopathological criteria will be used. Only histopathologically confirmed CIN2+ will be considered a true outcome for analysis purposes. Additional details regarding our definition of trial endpoints are provided in Section 3.13.

## **1.4. Summary**

We now know that HPV is involved in the pathogenesis of nearly all cervical tumors and that HPV16 and HPV18 combined account for 60% or more of all cervical cancer cases worldwide. Pre-clinical and safety/immunogenicity human trials (in >3,000 participants) have shown that vaccination against papillomaviruses using VLP-based vaccines protects against infection and tumor development in animals, and that the vaccines are both safe



and immunogenic in humans. Results from proof-of-principle trials also indicate that VLP-based vaccines are effective at protecting against persistent infection in humans. While alternative methods exist to control cervical cancer (i.e., Pap smear screening), these methods have been unsuccessful in developing countries. In the few developed countries in which screening has been successful, the costs associated with these efforts are high. The development of an HPV vaccine that protects against the development of cervical cancer and its precursors is therefore desirable. We propose to conduct a pivotal efficacy trial to evaluate the effectiveness of the HPV16/18 VLP-based vaccine manufactured by GSK Biologicals to protect against the development of histopathologically confirmed, incident CIN2+ associated with either HPV16 or HPV18 infections. The trial will be conducted in Guanacaste, Costa Rica, an area with high rates of cervical cancer and the site of an ongoing NCI-sponsored 10,000-woman, population-based natural history study.

## **2. STUDY OBJECTIVES**

### **2.1. Primary Objective**

The main objective of the present randomized clinical trial is to:

Demonstrate efficacy of the candidate vaccine compared with control in the prevention of histopathologically confirmed CIN2+ associated with an HPV16 or HPV18 cervical infection post dose 3 (from month 6 to month 48), in young adult women negative for HPV DNA (by PCR) at months 0 and 6 for the corresponding HPV type.

CIN2+ is defined as CIN2, CIN3, AIS, or invasive cervical cancer. Refer to Section [3.13.1](#) for the definition of the primary endpoint.

### **2.2. Secondary Objectives**

In addition to the primary objective listed above, this trial will address a few selective secondary objectives of importance to determine potential clinical uses of the vaccine. These secondary objectives are to:

1. Evaluate the safety of the candidate vaccine in young adult women in the entire randomized cohort, regardless of their initial HPV16/18 DNA (by PCR) status, and also stratified according to initial status. This will be done by strict monitoring and documentation of adverse events.
2. Evaluate the duration of protection conferred by the candidate vaccine against cervical infection with HPV16 or HPV18 post dose 3 (from month 6 to month 48), in young adult women negative for HPV DNA (by PCR) at months 0 and 6 for the corresponding HPV type.
3. Evaluate the efficacy of the candidate vaccine compared with control in the prevention of CIN2+ associated with cervical infection by any oncogenic HPV type, post dose 3 (from month 6 to month 48), in young adult women negative for HPV

**CONFIDENTIAL**

NCI Protocol # 04-C-N191; GSK Protocol # 580299/009 (HPV-009)  
Amendment 5

DNA (by PCR) at months 0 and 6 for the corresponding HPV type.  
CIN2+ is defined as CIN2, CIN3, AIS or invasive cervical cancer.

4. Demonstrate efficacy of the candidate vaccine compared with control in the prevention of histopathologically confirmed CIN2+ associated with an HPV16 or HPV18 cervical infection post dose 3 (from month 6 to month 48) detected within the lesional component of the cervical tissue specimen by PCR, in young adult women negative for HPV DNA (by PCR) at months 0 and 6 for the corresponding HPV type and seronegative by ELISA at month 0 for the corresponding HPV type.

CIN2+ is defined as CIN2, CIN3, AIS, or invasive cervical cancer.

5. Evaluate the efficacy of the candidate vaccine compared with control in the prevention of persistent HPV16 or HPV18 cervical infection post dose 3 (from month 6 to month 48), in young adult women negative for HPV DNA (by PCR) at months 0 and 6 for the corresponding HPV type.

Persistent HPV16 or HPV18 cervical infection is defined as detection of the same HPV type (by PCR) in cervical samples from all consecutive evaluations over approximately 12 months from Month 6 to Month 48.

6. Evaluate the vaccine immunogenicity (by ELISA and V5/J4 monoclonal antibody inhibition EIA) in a subset of (Amended: 19 May 2006) 600 subjects enrolled (immunogenicity subcohort).

Refer to Section 3.13.2 for definitions of the secondary endpoints.

### **2.3. Tertiary Objectives**

The NCI and Costa Rican researchers are committed to addressing several other objectives of interest to the scientific community. While a comprehensive listing of all tertiary objectives and analyses is beyond the scope of this protocol, to follow is a summary of some of the topics that are being considered for exploratory evaluation by NCI and Costa Rica. [Note: It is understood that the power to address some of these objectives may be limited].

1. An evaluation of alternative histological, cytological, virological, and immunological outcomes that could help us understand the mechanisms of vaccine action, and that might be used as surrogate endpoints in future studies.
2. An evaluation of the therapeutic efficacy (secondary prevention) of the candidate vaccine.
3. An evaluation of vaccine efficacy in subsets of women defined based on their socio-demographic and risk factor characteristics.
4. An evaluation of the effect of vaccination on the distribution of HPV types and variants in our population.
5. An evaluation of vaccine efficacy of the candidate vaccine against HPV infections that occur at extra-cervical sites. (Amended: 13 Nov 2008)

Refer to Section 3.13.1 for definitions of tertiary endpoints.

## **2.4. Ancillary Analyses & Studies**

The present clinical trial provides a unique opportunity for NCI, Costa Rican, and other investigators to answer various other immunological and natural history questions using information and materials collected as part of this trial. Opportunities might also arise to conduct ancillary studies that require the collection of additional information and/or biological specimens not planned for as part of the current investigation. Although the exact nature of these ancillary analyses and studies is currently unknown, we plan to set up a mechanism by which investigators can propose to perform ancillary studies within the context of our trial. These ancillary studies will be judged on their scientific merit and on their potential impact on the primary and secondary objectives of our trial. Efforts will be made to ensure that no ancillary study interferes with our ability to successfully evaluate the primary and secondary objectives listed above.

Any ancillary study or protocol requiring contacts with the participants not described in the current protocol or requiring collection of additional specimens will be submitted for review by the IRBs involved.

Examples of ancillary analyses and studies being considered at present include:

1. A family-based study to examine host genetic factors involved in the immunological response to HPV vaccination.
2. A nested case-control study to evaluate the risk factors associated with the development of “rapid onset” HSIL among young women.
3. A longitudinal study of women who are sexually inexperienced (virginal) at study entry and who subsequently become sexually active, to examine the early natural history of HPV infection in unvaccinated women and the host immune response to these early infections.

## **3. METHODS**

A detailed operating procedures manual called the “Field Procedures Manual” has been written for this study. The Field Procedures Manual has been reviewed to assure that it reflects the procedures described in this protocol. The investigators, study staff, and site monitors will be trained to use the Field Procedures Manual.

### **3.1. Overview of the Trial**

Approximately 20,000 women will be invited to participate in a double blinded, randomized clinical trial to evaluate whether vaccination with the bivalent HPV16/18 VLP-based vaccine manufactured by GSK Biologicals protects against the development of histopathologically confirmed, incident CIN2+. Women between 18-25 years of age at entry who are residents of Guanacaste Province or surrounding areas will be eligible. Participants will be required to not be pregnant at the time of vaccination, to agree to use an effective birth control method 30 days before vaccination until 60 days after the last vaccination (approximately 9 months total), and to be in good health as determined by an overall physical examination administered by a study physician at entry into the trial.



**CONFIDENTIAL**

NCI Protocol # 04-C-N191; GSK Protocol # 580299/009 (HPV-009)  
Amendment 5

Women will be identified through a census of the region performed in February/July 2000, and will be invited to participate in the trial by visiting one of the study clinics set up specifically for this trial. While randomization (into HPV or HAV vaccination) of 15,000 women was initially anticipated, randomization of 7,500 women will provide a sufficient study size to evaluate the main trial objectives based on revised statistical assumptions, see Section 4.7. (Amended: 13 Nov 2008)

Selected women who are eligible and agree to participate will be given a pelvic examination (if they report previous sexual activity) to collect baseline cervical specimens prior to vaccination, and will be administered 3 doses of a 0.5 mL vaccine containing either HAV (control vaccine) or 40 µg HPV16/18 VLP (20 µg each of HPV16 VLP and HPV18 VLP; VLP vaccine). The initial vaccination will be performed at entry, and additional vaccine doses will be given at one and six months following the initial vaccination. Women will be monitored at the clinic for a minimum of 60 (Amended: 31 Oct 2005) minutes following each vaccination, during which study personnel will collect information on reactogenicity of the vaccine. Appropriate medical treatment will be readily available in case of a rare anaphylactic reaction. A home visit in the week after each vaccination will also be performed by a specially-trained outreach worker on a 10% random sample of participants, to collect additional information on vaccine side effects. A toll-free number will be staffed throughout the duration of the trial so that volunteers may contact the vaccine trial clinical team at any time in case of an emergency.

Long-term follow-up will include clinic visits at yearly intervals starting on the first anniversary of vaccination and continuing through the fourth year anniversary. Follow-up visits will include a pelvic examination (among sexually experienced women) to permit a careful evaluation of the cervix and determination of HPV and cytological status.

Questionnaires and biological specimens will be obtained at the enrollment and follow-up visits. The questionnaire will elicit information on risk factors thought to be associated with HPV infection, SIL, or immune response to vaccination. Biological specimens collected during the trial will include blood (plasma, serum, red blood cells, and buffy coat on all participants, and cryopreserved PBMCs on a subset of participants), cervical cells used for cytology and HPV DNA testing and other research assays, and cervical secretions used to measure levels of mucosal antibodies and other immunological/inflammatory parameters.

Each volunteer is expected to have, on average, seven clinic visits (three vaccination visits and four annual follow-up visits). A 10% random sample of women will also have three home visits performed to monitor vaccine side effects. A subset of 600 women will have a visit at month 7 to assess immunogenicity a minimum of 30 days following the last vaccination. Women diagnosed with LSIL or HPV positive ASC-US will be scheduled for clinic visits with pelvic examinations at six-month intervals to assure adequate clinical management. Women with evidence of HSIL, ASC-H, AGC (Amended: 29 Mar 2005) or persistent ASC-US+/LSIL at any time during the study will be referred for colposcopic evaluation and subsequent excisional treatment, if needed. Treatment standards will be consistent with those in the United States and Costa Rica.

**CONFIDENTIAL**

NCI Protocol # 04-C-N191; GSK Protocol # 580299/009 (HPV-009)  
Amendment 5

To assist the reader, three summary tables/figures are provided. The first summarizes the expected number of women identified, enrolled, vaccinated and followed as part of our trial ([Table 1](#)). The second is an overview diagram of the trial ([Figure 2](#)). The third is a table depicting the timeline and procedures planned for the trial ([Table 2](#)).

**Table 1 Expected Trial Sample Size (Amended: 13 Nov 2008)**

|                                                                                                                                               |                 |
|-----------------------------------------------------------------------------------------------------------------------------------------------|-----------------|
| Number of women (from census) invited to participate                                                                                          | 19,000 – 21,000 |
| Number of eligible women who agree to be randomly assigned to one of two study arms                                                           | 7,500           |
| Number of women who will be randomly assigned to one of two study arms, will receive 3 doses of vaccine and will be evaluable in ATP analysis | 5,300           |
| Estimated number of women who complete four years of follow-up                                                                                | 6,375           |

**Figure 2 Diagrammatic Overview of the Costa Rican HPV16/18 VLP Vaccine Trial**

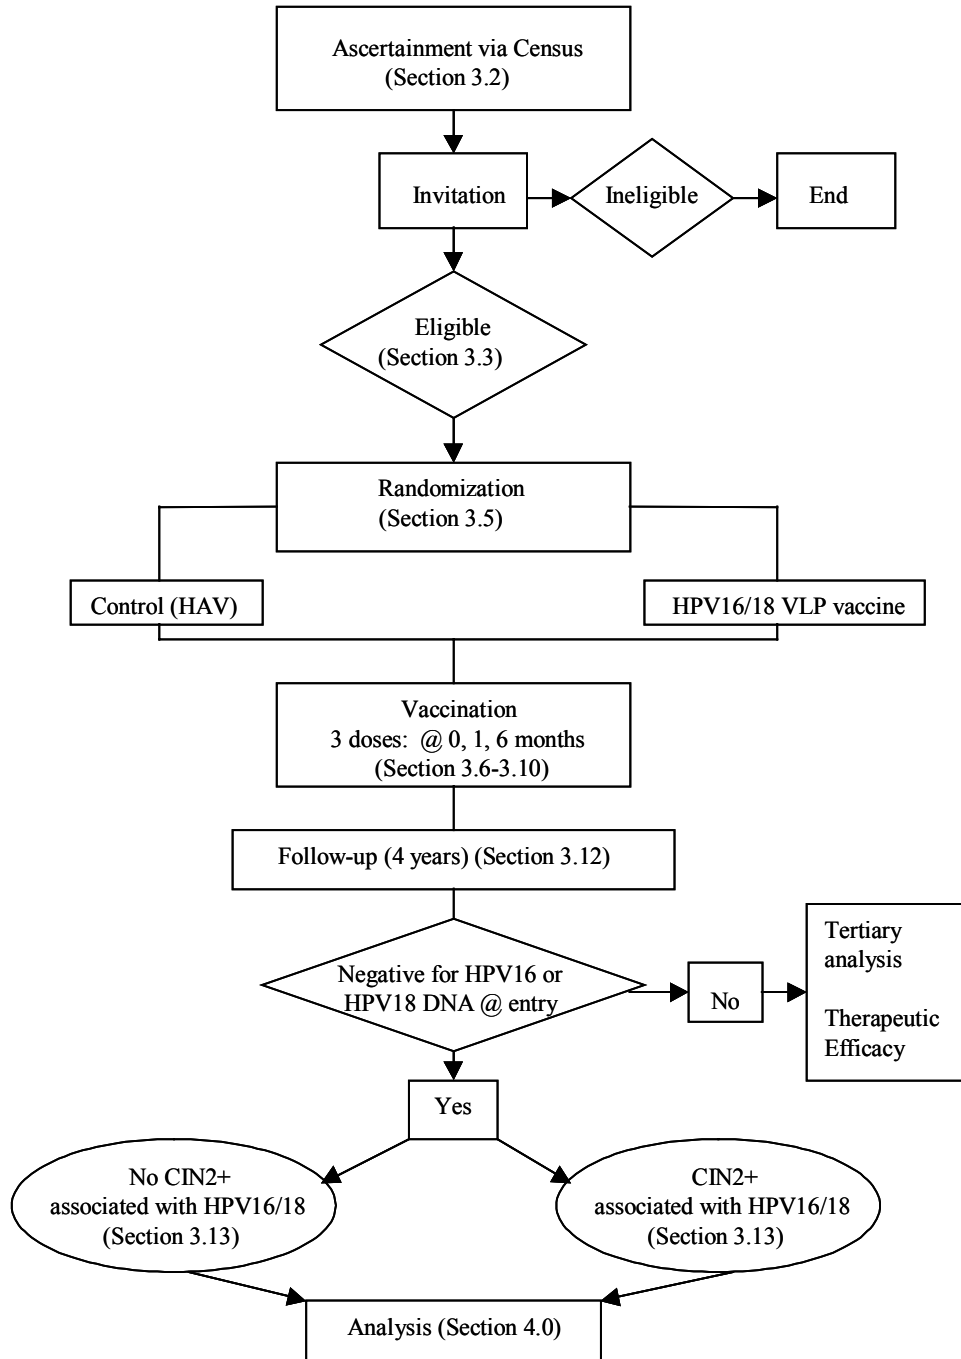

**Note:** There is only one set of study procedures, however, the analyses will vary depending on the initial HPV DNA status of the subject.

**CONFIDENTIAL**

NCI Protocol # 04-C-N191; GSK Protocol # 580299/009 (HPV-009)

Amendment 5

**Table 2 Timeline of Costa Rican HPV16/18 VLP Vaccine Trial Activities (Amended: 13 Nov 2008)**

|                                                                                                   | Invitation | Vaccination and AE monitoring |                        |                         | Follow-up                    |                     |             |                     |             |                     |              |                     |  |
|---------------------------------------------------------------------------------------------------|------------|-------------------------------|------------------------|-------------------------|------------------------------|---------------------|-------------|---------------------|-------------|---------------------|--------------|---------------------|--|
|                                                                                                   |            | 0 month                       | 1 month                | 6 months                | 7 months*                    | 12 months           | 18 months** | 24 months           | 30 months** | 36 months           | 42 months**  | 48 months           |  |
| Timing of Home Visit/Office Visit/Contact                                                         | -1 month   | 0 month                       | 1 month                | 6 months                | 7 months*                    | 12 months           | 18 months** | 24 months           | 30 months** | 36 months           | 42 months**  | 48 months           |  |
| Desired & [Maximum Allowable] Range in Days relative to Month 0 Visit                             | -30 to -3  | 0                             | 21 to 62 [21 to 120]   | 161 to 216 [121 to 300] | 30 to 60 after 6 month visit | 301 to 480          | 481 to 660  | 661 to 840          | 841 to 1020 | 1021 to 1200        | 1201 to 1380 | 1381 to 1740#       |  |
| Type of Visit/Contact                                                                             | Invitation | Enrolment & Vaccine #1        | One Month & Vaccine #2 | Six Month & Vaccine #3  | Immuno-genicity Subset       | 1 <sup>st</sup> Fup | Interim Fup | 2 <sup>nd</sup> Fup | Interim Fup | 3 <sup>rd</sup> Fup | Interim Fup  | 4 <sup>th</sup> Fup |  |
| Sampling timepoint                                                                                |            | Pre                           | PV I                   | PV II                   | PV III                       | PV III              | PV III      | PV III              | PV III      | PV III              | PV III       | PV III              |  |
| Contact potential subjects by mail                                                                | •          |                               |                        |                         |                              |                     |             |                     |             |                     |              |                     |  |
| Visit potential subjects at their homes and provide them with a copy of the informed consent form | •          |                               |                        |                         |                              |                     |             |                     |             |                     |              |                     |  |
| Informed consent                                                                                  |            | •                             |                        |                         |                              |                     |             |                     |             |                     |              |                     |  |
| Check eligibility/inclusion criteria                                                              |            | •                             |                        |                         |                              |                     |             |                     |             |                     |              |                     |  |
| Check exclusion criteria                                                                          |            | •                             |                        |                         |                              |                     |             |                     |             |                     |              |                     |  |
| Check vaccination deferral criteria                                                               |            | •                             | •                      | •                       |                              |                     |             |                     |             |                     |              |                     |  |
| Check elimination criteria                                                                        |            | •                             | •                      | •                       | •                            | •                   | •           | •                   | •           | •                   | •            | •                   |  |
| Check contraindications                                                                           |            | •                             | •                      | •                       |                              |                     |             |                     |             |                     |              |                     |  |
| Interview (Questionnaire)                                                                         |            | •                             | •                      | •                       |                              | •                   | •           | •                   | •           | •                   | •            | •                   |  |
| Complete medical history                                                                          |            | •                             |                        |                         |                              |                     |             |                     |             |                     |              |                     |  |
| Interim medical history                                                                           |            |                               | •                      | •                       | •                            | •                   | •           | •                   | •           | •                   | •            | •                   |  |
| Physical examination                                                                              |            | •                             |                        |                         |                              |                     |             |                     |             |                     |              |                     |  |
| Pre-vaccination body temperature                                                                  |            | •                             | •                      | •                       |                              |                     |             |                     |             |                     |              |                     |  |
| Urine sampling for urine pregnancy test (50 mL)                                                   |            | •                             | •                      | •                       |                              |                     |             |                     |             |                     |              |                     |  |
| Randomization                                                                                     |            | •                             |                        |                         |                              |                     |             |                     |             |                     |              |                     |  |
| Blood sampling                                                                                    |            |                               |                        |                         |                              |                     |             |                     |             |                     |              |                     |  |

**CONFIDENTIAL**

NCI Protocol # 04-C-N191; GSK Protocol # 580299/009 (HPV-009)

Amendment 5

|                                                                                                       | Invitation | Vaccination and AE monitoring |                        |                         | Follow-up                    |                     |             |                     |             |                     |              |                     |  |
|-------------------------------------------------------------------------------------------------------|------------|-------------------------------|------------------------|-------------------------|------------------------------|---------------------|-------------|---------------------|-------------|---------------------|--------------|---------------------|--|
| Timing of Home Visit/Office Visit/Contact                                                             | -1 month   | 0 month                       | 1 month                | 6 months                | 7 months*                    | 12 months           | 18 months** | 24 months           | 30 months** | 36 months           | 42 months**  | 48 months           |  |
| Desired & [Maximum Allowable] Range in Days relative to Month 0 Visit                                 | -30 to -3  | 0                             | 21 to 62 [21 to 120]   | 161 to 216 [121 to 300] | 30 to 60 after 6 month visit | 301 to 480          | 481 to 660  | 661 to 840          | 841 to 1020 | 1021 to 1200        | 1201 to 1380 | 1381 to 1740#       |  |
| Type of Visit/Contact                                                                                 | Invitation | Enrolment & Vaccine #1        | One Month & Vaccine #2 | Six Month & Vaccine #3  | Immuno-genicity Subset       | 1 <sup>st</sup> Fup | Interim Fup | 2 <sup>nd</sup> Fup | Interim Fup | 3 <sup>rd</sup> Fup | Interim Fup  | 4 <sup>th</sup> Fup |  |
| Sampling timepoint                                                                                    |            | Pre                           | PV I                   | PV II                   | PV III                       | PV III              | PV III      | PV III              | PV III      | PV III              | PV III       | PV III              |  |
| For antibody test/research (10 mL)                                                                    |            | •                             | •                      | •                       | •                            | •                   | •           | •                   | •           | •                   | •            | •                   |  |
| For hematocrit (3 mL)                                                                                 |            | •                             |                        |                         |                              |                     |             |                     |             |                     |              |                     |  |
| For research (10 mL)                                                                                  |            | •                             |                        |                         |                              |                     |             |                     |             |                     |              | •                   |  |
| For cryopreservation (40 mL)                                                                          |            | •***                          |                        | •***                    | •***                         | •***                | •***        | •***                | •***        | •***                | •***         | •***                |  |
| Pelvic examination†                                                                                   |            | •                             |                        | •††                     |                              | •                   | •           | •                   | •           | •                   | •            | •                   |  |
| Collection of cervical secretions for research†                                                       |            | •                             |                        | •††                     |                              | •                   | •           | •                   | •           | •                   | •            | •                   |  |
| Collection of cervical sample for:<br>-cervical cytology,<br>-HPV PCR testing, and<br>-HCII testing†¶ |            | •§                            |                        | •††                     |                              | •                   | •††         | •                   | •††         | •                   | •††          | •^                  |  |
| Collection of subject-obtained cervical sample for HPV PCR testing†                                   |            |                               |                        | •                       |                              |                     |             |                     |             |                     |              |                     |  |
| Collection of cervical cells for research†                                                            |            | •                             |                        | •††                     |                              | •                   | •           | •                   | •           | •                   | •            | •                   |  |
| Vaccination                                                                                           |            | •                             | •                      | •                       |                              |                     |             |                     |             |                     |              |                     |  |
| Monitoring for solicited & unsolicited symptoms 60 min post-vaccination                               |            | •                             | •                      | •                       |                              |                     |             |                     |             |                     |              |                     |  |

**CONFIDENTIAL**

NCI Protocol # 04-C-N191; GSK Protocol # 580299/009 (HPV-009)

Amendment 5

|                                                                                                                                                                                                                       | Invitation | Vaccination and AE monitoring |                        |                         | Follow-up                    |                     |             |                     |             |                     |              |                     |  |
|-----------------------------------------------------------------------------------------------------------------------------------------------------------------------------------------------------------------------|------------|-------------------------------|------------------------|-------------------------|------------------------------|---------------------|-------------|---------------------|-------------|---------------------|--------------|---------------------|--|
|                                                                                                                                                                                                                       | -1 month   | 0 month                       | 1 month                | 6 months                | 7 months*                    | 12 months           | 18 months** | 24 months           | 30 months** | 36 months           | 42 months**  | 48 months           |  |
| Timing of Home Visit/Office Visit/Contact                                                                                                                                                                             | -1 month   | 0 month                       | 1 month                | 6 months                | 7 months*                    | 12 months           | 18 months** | 24 months           | 30 months** | 36 months           | 42 months**  | 48 months           |  |
| Desired & [Maximum Allowable] Range in Days relative to Month 0 Visit                                                                                                                                                 | -30 to -3  | 0                             | 21 to 62 [21 to 120]   | 161 to 216 [121 to 300] | 30 to 60 after 6 month visit | 301 to 480          | 481 to 660  | 661 to 840          | 841 to 1020 | 1021 to 1200        | 1201 to 1380 | 1381 to 1740#       |  |
| Type of Visit/Contact                                                                                                                                                                                                 | Invitation | Enrolment & Vaccine #1        | One Month & Vaccine #2 | Six Month & Vaccine #3  | Immuno-genicity Subset       | 1 <sup>st</sup> Fup | Interim Fup | 2 <sup>nd</sup> Fup | Interim Fup | 3 <sup>rd</sup> Fup | Interim Fup  | 4 <sup>th</sup> Fup |  |
| Sampling timepoint                                                                                                                                                                                                    |            | Pre                           | PV I                   | PV II                   | PV III                       | PV III              | PV III      | PV III              | PV III      | PV III              | PV III       | PV III              |  |
| On one day from Day 3-6 after vaccination, a specially-trained outreach worker will interview a random subset of 10% of the 15,000 subjects for follow-up regarding post-vaccination solicited & unsolicited symptoms |            | •                             | •                      | •                       |                              |                     |             |                     |             |                     |              |                     |  |
| Recording of AEs (nonserious and serious) occurring during the period since the last visit                                                                                                                            |            |                               | •                      | •                       | •                            | •                   | •           | •                   | •           | •                   | •            | •                   |  |
| Recording of any concomitant medication/vaccination taken in the 30 days prior to SAE onset that could have contributed to the SAE                                                                                    |            | •                             | •                      | •                       | •                            | •                   | •           | •                   | •           | •                   | •            | •                   |  |
| Recording of any concomitant medication/vaccination used to treat an SAE, that clarifies the diagnosis of the SAE or is an immunosuppressant                                                                          |            | •                             | •                      | •                       | •                            | •                   | •           | •                   | •           | •                   | •            | •                   |  |
| Reporting of all pregnancies and all pregnancy outcome information                                                                                                                                                    |            | •                             | •                      | •                       | •                            | •                   | •           | •                   | •           | •                   | •            | •                   |  |
| Study Conclusion                                                                                                                                                                                                      |            |                               |                        |                         |                              |                     |             |                     |             |                     |              | •                   |  |

**CONFIDENTIAL**

NCI Protocol # 04-C-N191; GSK Protocol # 580299/009 (HPV-009)

Amendment 5

|                                                                       | Invitation | Vaccination and AE monitoring |                        |                         | Follow-up                    |                     |             |                     |             |                     |              |                     |  |
|-----------------------------------------------------------------------|------------|-------------------------------|------------------------|-------------------------|------------------------------|---------------------|-------------|---------------------|-------------|---------------------|--------------|---------------------|--|
| Timing of Home Visit/Office Visit/Contact                             | -1 month   | 0 month                       | 1 month                | 6 months                | 7 months*                    | 12 months           | 18 months** | 24 months           | 30 months** | 36 months           | 42 months**  | 48 months           |  |
| Desired & [Maximum Allowable] Range in Days relative to Month 0 Visit | -30 to -3  | 0                             | 21 to 62 [21 to 120]   | 161 to 216 [121 to 300] | 30 to 60 after 6 month visit | 301 to 480          | 481 to 660  | 661 to 840          | 841 to 1020 | 1021 to 1200        | 1201 to 1380 | 1381 to 1740#       |  |
| Type of Visit/Contact                                                 | Invitation | Enrolment & Vaccine #1        | One Month & Vaccine #2 | Six Month & Vaccine #3  | Immuno-genicity Subset       | 1 <sup>st</sup> Fup | Interim Fup | 2 <sup>nd</sup> Fup | Interim Fup | 3 <sup>rd</sup> Fup | Interim Fup  | 4 <sup>th</sup> Fup |  |
| Sampling timepoint                                                    |            | Pre                           | PV I                   | PV II                   | PV III                       | PV III              | PV III      | PV III              | PV III      | PV III              | PV III       | PV III              |  |
| Collection of Oral HPV Samples                                        |            |                               |                        |                         |                              |                     |             |                     |             |                     |              | ●                   |  |
| Collection of Anal HPV Samples                                        |            |                               |                        |                         |                              |                     |             |                     |             |                     |              | ●                   |  |
| Collection of Vulvar HPV Samples                                      |            |                               |                        |                         |                              |                     |             |                     |             |                     |              | ●                   |  |

\*7 month visit applies only to the 600 women enrolled in the immunogenicity subcohort. (Amended: 19 May 2006)

\*\*Visit is only required if indicated by the case management algorithm. The protocol-specified clinical management algorithm is summarized in [Appendix A](#).

Fup = follow-up; Pre = pre-vaccination; PV = post-vaccination. ● is used to indicate a study procedure that requires documentation in the individual CRF.

Note: The double-line borders following Months 0, 1 and 6 indicate that a home visit by a specially-trained outreach worker to monitor AEs will occur during the week following vaccination (any day from Day 3 to Day 6) in a random subset of 10% of the women.

\*\*\*This blood draw will be performed on a subset of women, and at selected study visits, as follows: A) A random sample of women at 0, 12, and 36 months; B) All women referred to accelerated screening visits per management algorithm, at yearly intervals **before March 31, 2009 (Amended: 10 September 2009)**; C) All women referred for colposcopic evaluation who require a biopsy or LEEP, at the time of the colposcopy visit; D) women enrolled in the immunogenicity subcohort after March 1, 2006. (Amended: 19 May 2006).

†Procedure will not be performed on virginal women.

††Pelvic examination will be performed if indicated by the case management algorithm. The protocol-specified clinical management algorithm is summarized in [Appendix A](#).

¶¶Reflex HCII HPV testing will be performed automatically for all subjects with results of ASC. HCII HPV testing will also be performed on all women who have a pelvic examination at the 0 month visit.

§HCII testing for *Chlamydia trachomatis* and *Neisseria gonorrhoeae* will be performed on samples obtained at the 0 month visit (or the first visit with a pelvic examination for women who are virginal at entry) only.

^ HPV testing by HCII will be performed on all specimens obtained at the 48 month visit.

#Every effort will be made to schedule study participants within the preferred Month 48 study visit window (1381 to 1740 days post Month 0). However, the window for the last visit might be extended until October 3, 2010, which is the scheduled date of last subject last visit (i.e, 1740 days after the 4 year anniversary date for the last subject first visit).

## **3.2. Study Population**

The trial will be conducted in the Guanacaste Province of Costa Rica and surrounding areas. Potential participants were initially identified through a door-to-door census of women in the region. The census was performed by a professional survey team in February/July 2000 and obtained the following information on all female residents between the ages of 12 and 22:

- Complete name
- Date of birth
- National ID number (if available)
- Nationality
- Address
- Telephone number (if available)
- Contact person outside the household.

While women recruited into our trial will be 18-25 years of age at enrollment (see eligibility criteria below), the census enumerated women aged 12-22. This was done to account for the lag time between the census and the initiation of the trial, and to allow for the possibility of extending enrollment if necessary to achieve the desired sample size. If the number of women to be invited is modified, approval will be sought by the IRBs reviewing the trial.

## **3.3. Eligibility Criteria**

### **3.3.1. Inclusion Criteria**

To be eligible for participation in our trial, participants must fulfill all of the following inclusion criteria:

- Gender: Female
- Age: 18 to 25 years (inclusive) at the time of first vaccination (i.e., enrollment)
- Planned residence: Guanacaste Province and surroundings (including parts of Puntarenas and Alajuela Provinces) for the 6 months following first vaccination
- Language: Able to speak/understand Spanish
- Mental Competence: Appears to be mentally competent
- Health Status: In good general health, as determined by a physical examination and history performed by a study physician at enrollment
- Consent: Written informed consent obtained prior to enrollment



**CONFIDENTIAL**

NCI Protocol # 04-C-N191; GSK Protocol # 580299/009 (HPV-009)  
Amendment 5

We have chosen to restrict the trial to women since the prevalence of detectable HPV infection and clinical outcomes is higher and more easily and reliably detectable in women than in men. It is understood, however, that should the vaccine prove effective, vaccination programs might include both males and females in order to achieve “herd immunity”. Separate trials will be required to evaluate the vaccine in men.

Our trial is further restricted to young, adult women (18-25 years) to maximize the number of participants unexposed to HPV at entry who are likely to be exposed to the virus during the follow-up period. We know from natural history studies in Guanacaste and elsewhere that prevalence of HPV peaks in the late teens and early 20s, following initiation of sexual activity, and that LSIL rates peak approximately 1-2 years later.

Restriction of our trial to the Guanacaste Province and surroundings was dictated by our understanding of this population, their cooperativeness in previous studies, and the known high rates of cervical cancer in this area. The high rates of disease in this population maximize the potential benefit to individual participants, should the vaccine prove effective. Women with definite plans to out-migrate will not be eligible to avoid loss to follow-up, since this could introduce bias into our trial.

Women who cannot speak or understand Spanish and those who are mentally incompetent will not be included in our trial because of concerns that they may not be capable of providing adequate informed consent.

Finally, to assure safety of women enrolled in our trial, we plan to collect medical history information and to perform a physical and pelvic examination (if sexually experienced) on all women at the time of their enrollment into the study. Women with a history of chronic conditions requiring treatment (such as cancer, chronic hepatic or kidney diseases, diabetes, or autoimmune disorders) will not be eligible for our trial.

### **3.3.2. Exclusion Criteria**

The following criteria will be checked at the time of enrollment. If any apply, the participant will not be included in the study.

1. History of chronic condition(s) requiring treatment such as cancer, chronic hepatic or kidney diseases, diabetes, or autoimmune disorders.
2. Acute or chronic, clinically significant pulmonary, cardiovascular, neurologic, hepatic or renal functional abnormality, as determined by physical examination or previous laboratory tests carried out by the participant’s doctor.
3. History of allergic reaction (e.g., difficulty breathing) after receipt of any vaccine.
4. History of vaccination against hepatitis A (the control vaccine is a hepatitis A vaccine) or a known history of hepatitis A infection.
5. History of chronic administration (>14 days) of immunosuppressants or immunomodulating drugs within 6 months prior to the first vaccine dose. (For corticosteroids, this will mean prednisone, or equivalent,  $\geq 0.5$  mg/kg/day. Inhaled and topical steroids are allowed.)

**CONFIDENTIAL**

NCI Protocol # 04-C-N191; GSK Protocol # 580299/009 (HPV-009)  
Amendment 5

6. Are sexually experienced and of childbearing potential (i.e., not surgically sterilized), and are unwilling to use an effective method of birth control for 30 days before vaccination until 60 days after the last vaccination (approximately 9 months)
7. Uterus has been removed.
8. Use of any investigational or non-registered product (drug or vaccine) other than the study vaccines within 30 days preceding the first dose of study vaccine, or planned use during the study period.
9. Previous administration of monophosphoryl lipid A (MPL® [Monophosphoryl lipid A; Manufactured by Corixa Corporation, Seattle, Washington, USA (Formerly Ribic)]) or AS04 adjuvant (no vaccines currently licensed contain these).
10. Previous vaccination against human papillomavirus.
11. History of allergic disease, suspected allergy or reactions likely to be exacerbated by a component of the study vaccines, i.e., 2-phenoxyethanol or neomycin.
12. Hypersensitivity to latex (found in the tip cap and syringe plunger).
13. Any medically diagnosed or suspected immunodeficient condition based on medical history and physical examination (no lab testing required).

Those women who report having a history of chronic conditions requiring treatment, an acute or chronic functional abnormality noted upon physical examination, an allergic response to any previous vaccination or to components of the vaccine/syringe, medically diagnosed or suspected immunodeficient conditions (note that this assessment is based on medical history and physical examination; no lab testing is required), or a recent history of chronic use of immunosuppressant or immune-modulating drugs will also be excluded, to assure safety of the participants. Women with a history of hepatitis A vaccination or of acute hepatitis A disease will also be excluded, since HAV will be used as the control vaccine in our trial and revaccination is not currently indicated in these groups.

Although there is no indication to date that the HPV16/18 VLP vaccine might adversely affect pregnant women or their unborn children, the possible risks to pregnant women and unborn babies are not known. Therefore, we intend to exclude from the trial sexually experienced women who do not agree to use an effective form of birth control from 30 days before vaccination until 60 days after the last vaccination (approximately 9 months total). Acceptable forms of birth control include abstinence; surgical sterilization; oral contraceptives; the intrauterine contraceptive device; a diaphragm or condom; or injectable contraceptives including implants, monthly injectables, and three-monthly injectables.

Women without an intact uterus will be excluded from the trial since they are not at risk of developing cervical HPV infection or CIN2+.

Finally, women who report recent (within 30 days) or planned (during the study period) use of an investigational or non-registered product (drug or vaccine, including *MPL*, AS04, and HPV vaccine) will be excluded. This will be done to avoid having an adverse event occurring in response to one of these other agents being confused with an adverse event resultant from study vaccination.

### 3.3.3. Deferral Criteria

Women will have their enrollment into the trial and/or vaccination visits (Amended: 31 Oct 2005) deferred if they:

- Received immunoglobulins within 90 days preceding enrollment/vaccination visit (Amended: 31 Oct 2005).
- Received a registered vaccine within 30 days of enrollment/vaccination visit. Administration of routine Meningococcal, Hepatitis B, Influenza, and Diphtheria/Tetanus vaccines up to 8 days before any dose of study vaccine is allowed. (Amended: 31 Oct 2005)
- Are suffering from an acute disease or have an oral temperature  $\geq 37.5^{\circ}\text{C}$  at enrollment/vaccination visit (Amended: 31 Oct 2005). Acute disease is defined as the presence of a moderate or severe illness with or without fever. Vaccines can be administered to women with a minor illness such as diarrhea and mild upper respiratory infection.
- Are pregnant, less than three months post-partum, or breastfeeding at the time of enrollment/vaccination visit. If the participant reports a menstrual delay and her pregnancy test is negative, she will be deferred for a minimum of seven days. Women with a second negative pregnancy test after the minimal deferral period would be eligible for enrollment/vaccination. A menstrual delay is defined as a delay of more than five days for women with regular menses and more than 35 days for women with irregular menses. (Amended: 31 Oct 2005)
- Are sexually experienced and using an effective method of birth control (including abstinence) for less than 30 days at the time of enrollment/vaccination visit. (Amended: 31 Oct 2005)
- Are sexually experienced but cannot have a pelvic exam performed due to heavy bleeding (menstruation or other) or heavy vaginal discharge. This criteria applies only to sexually experienced women at enrollment or those who require a pelvic exam at the Month 6 visit. (Amended: 31 Oct 2005)

Women who have received immunoglobulins (within 90 days of enrollment) and/or other vaccinations (within 30 days of enrollment) or who have current acute illnesses will be deferred to avoid confounding of our findings by these other vaccinations/conditions (for example, an adverse event to another vaccination).

Although there is no reason to believe that HPV16/18 VLP vaccination would adversely affect pregnant women or their unborn child, the possible risks to pregnant women and unborn babies are not known. Therefore, we have chosen to defer enrollment of pregnant women. A sensitive pregnancy test will be performed at the study clinic prior to each vaccination, and women found to be pregnant will have their enrollment deferred until they are at least three months post-partum and no longer breastfeeding. It should be noted that women who are found to be pregnant at the time of their one or six month vaccinations, despite use of an acceptable form of birth control, will not receive their subsequent vaccinations and will have their follow-up pelvic examinations and other follow-up activities deferred until they are at least three months post-partum.

## CONFIDENTIAL

NCI Protocol # 04-C-N191; GSK Protocol # 580299/009 (HPV-009)  
Amendment 5

Sexually experienced women who are not pregnant but report not using an acceptable form of birth control (including abstinence; surgical sterilization; oral contraceptives; the intrauterine contraceptive device; a diaphragm or condom; or injectable contraceptives including implants, monthly injectables, and three-monthly injectables) for at least 30 days will be deferred until they begin practicing birth control.

Women will also be deferred if, for any reason, a pelvic examination cannot be performed at the time of the initial visit. A pelvic examination will allow us to determine whether a woman has prevalent HPV infection and/or SIL at the time of initial vaccination. Although initial cytological and virological status will not be used to define a woman's eligibility for participation in the trial, it is important that cytological and HPV status at enrollment be obtained for sexually experienced women since the vaccine may not protect against an already established infection/lesion. It can be assumed that virginal women are unexposed to HPV and not at risk of SIL. The low rates of exposure to HPV among virginal women in Guanacaste have been confirmed by serological testing of self-reported virginal women in our natural history study.

### 3.3.4. Elimination criteria from the ATP analyses during the study

For the primary according to protocol (ATP) analysis planned for our study, the following elimination criteria may apply. These are also discussed in the statistical analysis section of this protocol (Section 4.2).

- Women who do not receive all three doses of the vaccine within the protocol-specified intervals (see Table 4).
- Women who are found to be HPV16 and HPV18 DNA positive (*for the corresponding type considered in the analysis*) during the vaccination phase, *by clinician and/or self-administered collection* (months 0 or 6) (*Amended: 10 September 2009*).
- Women who indicate chronic administration (defined as more than 14 days) of immunosuppressants or other immune-modifying drugs occurring in the 90 days prior to blood sampling. For corticosteroids, this will mean prednisone, or equivalent,  $\geq 0.5$  mg/kg/day. Inhaled and topical steroids are allowed. It shall be noted that concomitant medications administered during this study will be collected only in the context of assessing SAEs. In specific, we will collect information on medications that are taken in the month preceding an SAE and those that are taken to treat an SAE if, in the investigator's judgement, the medication used to treat the SAE can help clarify the diagnosis of the SAE or if the medication is an immunosuppressant.

### 3.4. Contraindications to Subsequent Vaccination

The following events constitute a contraindication to further vaccination. If any of the events listed below occur, women will not receive further doses of the vaccine but will continue to be followed for the full four years or until resolution of the AE, whichever occurs last. The decision to discontinue vaccination will be carefully documented on the appropriate CRF, along with the date and reason for vaccine discontinuation. Women

who fail to receive one or more doses of vaccine will not be included in the ATP analysis but will be included in the ITT analysis (see Section 5).

Hypersensitivity reaction following vaccine administration

- Pregnancy
- Any medically diagnosed or suspected immunodeficient condition based on medical history or physical examination (no lab testing required)
- Any other acute or newly acquired chronic condition at the time of scheduled vaccination as determined by the medical history, which in the opinion of the study doctor precludes further administration of the study vaccine
- Any SAE judged to be possibly, probably, or definitely related to study vaccine
- Other significant reactions including severe pain, severe swelling, severe limitation of motion, persistent high fever, severe headache or other systemic or local reactions, which in the opinion of the study doctor preclude further administration of the study vaccine

### **3.5. Trial Arms & Randomization**

The present trial will be a double blinded, randomized trial consisting of two arms. Women randomly assigned to the experimental arm will receive the HPV16/18 VLP vaccine while those randomly assigned to the control arm will receive the HAV vaccine, as described more fully in Section 3.6, Section 3.7, and Section 3.10. Women who agree to visit one of the study clinics and who fulfill the eligibility criteria described earlier will be randomly assigned to one of the two trial arms at an overall ratio of 1:1. Because the HPV16/18 VLP and HAV vaccines are indistinguishable in their appearance, we are able to and will mask investigators and participants to trial arm assignment.

A blocked randomization procedure will be used, with random block sizes used to avoid the possibility of unmasking at the clinic site. Details of the vaccine labeling and subject randomization process are provided in [Appendix B](#).

Since knowledge of vaccine arm assignment would not affect treatment of participants who have an SAE, no provision is made to allow for unblinding on site in Costa Rica. Unblinding of individual participants, at the request of the DSMB, the IRBs, the GSK Global Clinical Safety Department or the NCI Medical Monitor as part of reporting requirements to the FDA (e.g., for rapid reporting of an unexpected SAE associated with vaccination) will be allowed. This individual unblinding will be performed in a manner that assures that the overall study blinding is maintained, that staff involved in the conduct, analysis, or reporting of the study remain blinded except where absolutely impractical, and that any unblinding be appropriately documented (*see also Section 3.16.3, Exiting Women from the Trial*) (*Amended: 10 September 2009*). Treatment codes will be kept at NCI and GSK under controlled/secured access.

### 3.6. Study Vaccines

The candidate HPV16/18 VLP-based vaccine to be used in our trial has been manufactured by GSK Biologicals. The control vaccine (investigational formulation of *Havrix* hepatitis A vaccine - HAV) has been developed and manufactured by GSK Biologicals. The Quality Control Standards and Requirements for the candidate vaccine and the control vaccine are described in separate release protocols and the required review and agreement of the FDA will be obtained before initiation of the trial.

The candidate HPV16/18 virus-like particle (VLP)/AS04 vaccine will be supplied as a liquid in mono-dose syringes. HPV16/18 VLPs at a concentration of 40 µg/0.5 mL are formulated with AS04 adjuvant. AS04 is an investigational adjuvant comprised of 500 µg of aluminum hydroxide (Al(OH)<sub>3</sub>) and 50 µg of monophosphoryl lipid A (MPL). The control HAV vaccine will be supplied as a liquid in mono-dose syringes and will have an indistinguishable appearance to the HPV16/18 VLP vaccine. Inactivated hepatitis A viral antigen at a concentration of 720 ELISA units/0.5 mL is formulated with 500 µg aluminum salts (as hydroxide: Al(OH)<sub>3</sub>), 0.5% 2-phenoxyethanol (w/v), and contains trace amounts of neomycin sulfate (no more than 20 ng per 0.5 mL dose).

Three lots of HPV16/18 VLP vaccine have been prepared to support the Phase III efficacy trial. Each HPV16/18 VLP vaccine lot is manufactured using one single batch of HPV16 L1 VLP antigen and one single batch of HPV18 L1 VLP antigen. Four lots of an investigational formulation of *Havrix* control vaccine have been prepared to support the Phase III efficacy trial. Formulation of the investigational *Havrix* control vaccine lots was performed using one batch of purified inactivated Hepatitis A antigen.

It should be noted that after completion of this trial and under a separate protocol, participants will be offered cross-over vaccination. This will include offering the licensed formulation of *Havrix* (1440 ELISA units/0.5 mL) hepatitis A vaccine to women who received the HPV16/18 VLP vaccine and the *licensed* HPV16/18 VLP vaccine to women who received the investigational hepatitis A vaccine (***Amended: 10 September 2009***). In addition, all women will be offered vaccination with Engerix-B® (Hepatitis B Vaccine [Recombinant]; Manufactured by GlaxoSmithKline Biologicals, Rixensart, Belgium). ***In order to reduce clinic visits, women who are eligible to receive both the hepatitis A vaccine and hepatitis B vaccine will be offered vaccination with Twinrix® [Hepatitis A Inactivated & Hepatitis B (Recombinant) Vaccine] (Amended: 10 September 2009).***

The Material Safety Data Sheets (MSDSs) for HPV16/18 VLP vaccine and the investigational formulation *Havrix* that will be administered during this study are provided as [Appendix E](#) of this protocol.

At the time of study start, five Phase I-IIb clinical trials were conducted that evaluated vaccine safety. (Amended: 13 Nov 2008). During these trials, the 40 µg HPV16/18 VLP AS04 vaccine (i.e., the formulation planned for use in the current trial) was administered to approximately 690 young women living in Brazil, Canada or the United States who ranged in age from 15 to 30 years. No Serious Adverse Events associated with this formulation were considered by the investigators to be related to vaccination.

**CONFIDENTIAL**

NCI Protocol # 04-C-N191; GSK Protocol # 580299/009 (HPV-009)  
Amendment 5

The single largest study evaluating HPV16/18 VLP vaccine safety was GSK study HPV-001. In this double-blind randomized trial, 1113 subjects (560 vaccine, 553 placebo) were evaluated. Subjects who received vaccine reported slightly higher rates of solicited local adverse events (injection site pain, redness, and swelling) compared with the placebo group; however, the rates of solicited general adverse events were similar between the vaccine and placebo groups. Overall, most solicited local and solicited general adverse events were low-grade in intensity and transient. Rates of unsolicited symptoms with onset within 30 days after each vaccination were similar in both groups.

The results of these clinical trials suggest that the HPV16/18 VLP vaccine is safe and well tolerated. However, with the administration of any vaccine there may be unanticipated allergic reactions (which may include rash and/or other allergic manifestations) and, as with the administration of any foreign protein, there may be rare occurrences of anaphylactic reaction. Please refer to the Investigator Brochure (IB) for a review of the HPV16/18 VLP vaccine pre-clinical and clinical studies. (Amended: 13 Nov 2008)

### **3.7. Selection of an Investigational Formulation of *Havrix* as the Control Vaccine**

The purpose of an active control is to confer benefit to recipients while maintaining the study blind. Therefore, the control vaccine must match the HPV16/18 VLP candidate vaccine in appearance, reactogenicity, injection volume, and number of doses. Moreover, the control vaccine must be manufactured by GSK Biologicals to enable labeling (for blinding and randomization). Another important consideration is limited prior use of the active control vaccine in the population targeted for enrollment, since individuals previously vaccinated with the active control vaccine would be ineligible for our study. In addition, Costa Rica, and particularly Guanacaste, is considered an intermediate to high incidence area for hepatitis A and a low risk area for hepatitis B [[Taylor, 2001](#)].

Based on the above criteria, and in consultation with the trial DSMB, we have selected an investigational formulation of Hepatitis A vaccine (HAV) called *Havrix* as the control vaccine for our trial. A 3-dose, 720 ELISA unit (EL.U.) formulation of *Havrix* is registered for use in Costa Rica, although it has been supplanted by a more convenient 2-dose 1440 EL.U. formulation in recent years. All marketed *Havrix* products have a 1.0 mL injection volume. To maintain the blind, lots of *Havrix* 720 EL.U. investigational formulation will be prepared with a 0.5 mL injection volume; they will be labelled "For Investigational Use Only". The safety, immunogenicity, and efficacy of the *Havrix* investigational formulation is expected to match that of the *Havrix* 720 EL.U. formulation presently registered in Costa Rica.

In the United States, *Havrix* is licensed for use in children and adults. In adults, the vaccine is administered as a single dose of 1440 ELISA units (EL.U.) adsorbed on 0.5 mg Alum in 1.0 mL, followed by a booster dose 6 to 12 months after the primary dose.

There is a sufficient body of data to support that a 720 EL.U. dose of *Havrix*, administered to adults on a 0, 1, 6 month schedule, will be safe and immunogenic. This data is summarized below.

**CONFIDENTIAL**

NCI Protocol # 04-C-N191; GSK Protocol # 580299/009 (HPV-009)  
Amendment 5

First, *Havrix* 720 EL.U./0.5 mg Alum in 1.0 mL has been licensed for use in adults in several countries on a 0, 1, 6 month schedule. Between 1992 and 1997, *Havrix* 720 EL.U. adsorbed on 0.5 mg Alum (1.0 mL) was registered for use on a 0, 1, 6 month schedule in 68 countries including Canada, Australia, the United Kingdom, Brazil and Sweden. Data from trials which included 1,025 adults who were given *Havrix* 720 EL.U./0.5 mg Alum (1.0 mL) on a 0, 1, 6 month schedule were also included in the original product license application (PLA) (Ref. No. 92-0465) submitted for *Havrix* and supported licensure in the US. In most of the countries where *Havrix* 720 EL.U. (1.0 mL) was registered for use in adults on a 0, 1, 6 month schedule, this formulation has now been replaced by a formulation containing 1440 EL.U. of viral antigen adsorbed on 0.5 mg Alum per 1.0 mL dose, since the higher antigen content formulation can be given on a 2-dose schedule.

Second, *Havrix* 720 EL.U./0.25 mg Alum in 0.5 mL (pediatric formulation) is currently licensed in the US for use in children aged 12 months (Amended: 31 Oct 2005) to 18 years on a 0, 6-12 month schedule. The 720 EL.U. dose has been demonstrated to be safe for use in children in numerous clinical trials and through post-marketing surveillance. This suggests that the formulation can be safely administered to adults.

Finally, the formulation of Twinrix® (Hepatitis A Inactivated & Hepatitis B [Recombinant] Vaccine; Manufactured by GlaxoSmithKline Biologicals, Rixensart, Belgium) currently licensed in the US for use in adults contains 720 EL.U. of hepatitis A virus antigen (and 20 µg HBsAg adsorbed on 0.45 mg Alum) per 1.0 mL and is administered on a 0, 1, 6 month schedule. Data from 11 clinical trials involving a total of 1812 subjects submitted as part of the *Twinrix* PLA (BB-IND 6986) and post-marketing surveillance data indicate that this dose and schedule of hepatitis A virus antigen is both safe and immunogenic in adults. It is reasonable to expect that the same dose and schedule of *Havrix* (720 EL.U. given on a 0, 1, 6 month schedule) administered as a monovalent vaccine will be safe and immunogenic in adults.

In summary, there is a preponderance of evidence to suggest that investigational *Havrix* 720 EL.U. in 0.5 mL will be safe and immunogenic when administered to adults. This makes it a suitable active control for this HPV vaccine efficacy study. The use of investigational *Havrix* as a control will allow this study to be conducted in a fully blinded fashion and will offer benefit for the women allocated to the control group.

### **3.8. Central Storage of Vaccine**

Vaccine syringes will be shipped from GSK Biologicals in Rixensart to the study site in Costa Rica at 4°C (range 2°C to 8°C). Once in Costa Rica, the vaccine shipment QC procedures detailed in the Field Procedures Manual will be followed to ensure that the vaccine has been maintained at the proper temperature during shipment. At the Costa Rican repository, boxes containing vaccine syringes will be transferred and stored in a walk-in refrigerator located at the central study repository and kept at 4°C (range 2°C to 8°C) and will never be frozen. The walk-in refrigerator will be equipped with temperature monitors, with a back-up refrigeration unit and generator, and will be monitored on a daily basis by trained staff. Access to the vaccine storage facility will be restricted to authorized personnel only.



Deviations in temperature beyond those allowable by protocol that occur either during vaccine storage, vaccine transport or vaccine use will be documented and the NCI principal investigator or his designee will be notified. NCI will also notify GSK Biologicals regarding such violations. Vaccines affected by such deviations will not be used for the trial without joint approval by NCI and GSK Biologicals.

### **3.9. Concomitant Medications/Vaccination**

We plan to provide women in our rural population with two 500 mg acetaminophen pills after each vaccination with an indication to take the medication in case of a mild fever or pain. The use of this acetaminophen during the trial will be followed in the 10% random subset of women for whom a home visit is performed on Day 3 to Day 6 following each vaccination. Also, concomitant medications administered during this study will be collected in the context of assessing AEs. In specific, we will collect information on medications/vaccinations that are taken in the month preceding an AE and those that are taken to treat an AE if it is felt that the medication used to treat the AE can help clarify the diagnosis of the AE or if the medication is an immunosuppressant. (Amended: 29 Mar 2005)

### **3.10. Vaccination Route and Schedule**

Participants will be vaccinated intramuscularly in the deltoid muscle (upper arm) and will receive three doses at 0, 1, and 6 months, as summarized in [Table 3](#) below.

**Table 3 Vaccine Dosage and Administration**

| <b>Timing</b> | <b>Dose</b> | <b>Vaccine/Control</b> | <b>Route</b>  | <b>Site</b> | <b>Side</b>  |
|---------------|-------------|------------------------|---------------|-------------|--------------|
| Month 0       | 1           | √                      | Intramuscular | Deltoid     | Non-dominant |
| Month 1       | 2           | √                      | Intramuscular | Deltoid     | Non-dominant |
| Month 6       | 3           | √                      | Intramuscular | Deltoid     | Non-dominant |

### **3.11. Clinic Visits During Vaccination Phase (0, 1, 6, & 7 months)**

Three clinic visits are planned for vaccination at 0, 1, and 6 months. At the first clinic visit, we will collect information for determining eligibility, ensure that written informed consent has been obtained prior to any study procedure, perform urine pregnancy testing, assign treatment arm by randomization, give the initial vaccination, and monitor women for at least 60 (Amended: 31 Oct 2005) minutes following vaccination with appropriate medical treatment readily available in case of a rare anaphylactic reaction. At the two subsequent visits at 1 and 6 months, information on AEs will be collected, subsequent vaccinations will be administered, and women will be monitored for a minimum of 60 (Amended: 31 Oct 2005) minutes following vaccination with appropriate medical treatment readily available in case of a rare anaphylactic reaction. After each vaccination visit, women will be provided with two 500 mg acetaminophen pills with an indication to take the medication in case of a mild fever or pain. The use of acetaminophen during the trial will be followed in the 10% home visit subset. A summary of the procedures performed at each of these visits is presented in [Table 2](#). Intervals between study visits during the vaccination phase of the trial are provided in [Table 4](#).

**CONFIDENTIAL**

Blood specimens will be collected at each of these three timepoints to permit evaluation of antibody titers at the time of each vaccination and to allow for research-based testing. Blood collected at entry will also be used to measure hematocrit levels, as a service to participants. Cervical secretions and cervicovaginal cells will be collected from non-virginal women at entry and at the six-month visit, to assess HPV status at the beginning and end of the vaccination schedule and to allow for research tests. Cervicovaginal cells collected at the first pelvic examination will also be used for *Chlamydia trachomatis* and *Neisseria gonorrhoeae* testing using the Hybrid Capture test (Digene Corp., Gaithersburg, MD, USA). A ThinPrep® (a standardized cervical specimen preparation method; Manufactured by Cytoc Corporation, Boxborough, MA, USA) Pap smear will also be prepared (non-virginal women only) before the first vaccination, to assess cytological status at entry. An interview will be conducted at entry and at the six-month visit to assess exposure to known and suspected risk factors for HPV infection and cervical cancer.

To permit characterization of maximal antibody titers achieved after all three doses of vaccine are administered, a blood draw is also planned a minimum of 30 days after the third vaccination (7 month visit) on a subset of (Amended: 19 May 2006) 600 women randomly assigned to one of the two arms of our trial.

**Table 4 Intervals Between Study Visits (Amended: 13 Nov 2008)**

a. Yearly Visit Schedule

| Interval             | Length of interval (days) |
|----------------------|---------------------------|
| 1 (Month 0→Month 1)  | 21 to 62                  |
| 2 (Month 0→Month 6)  | 161 to 216                |
| 3 (Month 6→Month 7)* | 30 to 60**                |
| 4 (Month 0→Month 12) | 301 to 660                |
| 5 (Month 0→Month 24) | 661 to 1020               |
| 6 (Month 0→Month 36) | 1021 to 1380              |
| 7 (Month 0→Month 48) | 1381 to 1740#             |

b. Six-Monthly Visit Schedule

| Interval***           | Length of interval (days) |
|-----------------------|---------------------------|
| 1 (Month 0→Month 1)   | 21 to 62                  |
| 2 (Month 0→Month 6)   | 161 to 216                |
| 3 (Month 6→Month 7)*  | 30 to 60**                |
| 4 (Month 0→Month 12)  | 301 to 480                |
| 5 (Month 0→Month 18)  | 481 to 660                |
| 6 (Month 0→Month 24)  | 661 to 840                |
| 7 (Month 0→Month 30)  | 841 to 1020               |
| 8 (Month 0→Month 36)  | 1021 to 1200              |
| 9 (Month 0→Month 42)  | 1201 to 1380              |
| 10 (Month 0→Month 48) | 1381 to 1740#             |

\* This interval applies only to the 600 women enrolled in the immunogenicity subcohort (Amended: 19 May 2006), i.e., the women in the immunogenicity subset.

\*\*Date of the Month 6 visit serves as the reference date.

\*\*\*This schedule is to be followed by women detected as having evidence of LSIL (regardless of HPV testing results) or ASC-US concomitant with detection of an oncogenic HPV type.

N.B. Except for Month 7 where the date of the Month 6 visit serves as the reference date, the date of the first

**CONFIDENTIAL**

NCI Protocol # 04-C-N191; GSK Protocol # 580299/009 (HPV-009)

Amendment 5

vaccination serves as the reference date for intervals between study visits. Also, for Intervals 1 and 2, the length of interval listed represents the desired interval. Broader, allowable intervals are defined in [Table 2](#). (Amended: 31 Oct 2005)

#Every effort will be made to schedule study participants within the preferred Month 48 study visit window (1381 to 1740 days post Month 0). However, the window for the last visit might be extended until October 3, 2010, which is the scheduled date of last subject last visit (i.e., 1740 days after the 4 year anniversary date for the last subject first visit).

### **3.12. Active Follow-up of Participants (Months 12-48)**

Long-term follow-up is planned for a period of four years from the time of entry into the trial. Follow-up will be performed to monitor trial outcomes, to collect additional information on long-term AEs, and as part of NCI-sponsored ancillary studies to evaluate issues of immunological and etiologic interest. A summary of procedures performed during follow-up is presented in [Table 2](#). Intervals between study visits during the follow-up phase of the trial are provided in [Table 4](#).

Follow-up will consist of yearly clinic visits, at which time the following activities will be completed:

- An interview to collect information on risk factors known or suspected to be associated with HPV infection, SIL, or the immune response to vaccination.
- An interview to obtain information on AEs (Amended: 29 Mar 2005), including hospitalizations, incapacitation lasting more than one day, pregnancies, and other events reported by participants. AEs and SAEs are further defined in [Appendix D](#).
- A pelvic examination (if the participant reports previous sexual activity) to collect cervical specimens for cytological and virological evaluation. Cervical secretions will also be collected at this time for ancillary evaluation of local immune responses.
- A blood specimen will be collected for HPV antibody and other testing. On an approximately (Amended: 19 May 2006) 10% subset of women at enrollment and at the 7 (Amended: 19 May 2006), 12 and 36 month visits, additional blood for ancillary studies will be collected to permit cryopreservation of lymphocytes for immunological assessment.

Women who at any of the yearly screening visits are found to have evidence of ASC-US+/LSIL will be seen at six-month intervals (rather than yearly intervals), and will continue to be seen every six months until there is evidence of disease persistence/progression (in which case they will be referred for colposcopic evaluation) or three consecutive normal cytologies are observed (in which case they will return to a yearly screening interval). Women who at any of the clinic visits are found to have evidence or suspicion of AGC/ASC-H/HSIL/cancer will be immediately referred for colposcopic evaluation and excisional treatment, if needed (Amended: 13 Nov 2008). Participants referred for colposcopic evaluation will be seen by an expert study colposcopist. Detailed colposcopy referral and colposcopy management algorithms are provided in [Appendix A](#). Women who are referred for colposcopic evaluation, whether treated or not, will continue to be actively followed at six month intervals using the criteria defined above for women diagnosed with ASC-US+/LSIL.

Women who are determined to be pregnant at the time of their scheduled follow-up visit will be deferred until they are three months post-partum. Please note that pregnancy outcomes will be documented for all pregnancies among trial participants, via participant report and review of medical charts.

A small proportion of cytology and HPV specimens is expected to be inadequate and/or unsatisfactory for evaluation (<5%). In such cases, we do not intend to resample the women until her next scheduled clinic visit. However, to ensure optimal clinical management of women with inadequate/unsatisfactory results, we will presume an LSIL cytology and HPV DNA positivity. This will effectively mean that women with inadequate/unsatisfactory results are either rescreened at 6-month intervals (if no previous history of ASC-US+/LSIL), or referred for colposcopic evaluation (if previous history of ASC-US+/LSIL).

### **3.13. Trial Endpoints**

#### **3.13.1. Primary Endpoint**

The primary endpoint for our trial will be histopathologically confirmed, incident CIN2+ (defined as CIN2, CIN3, AIS, or invasive cervical cancer) associated with an HPV16 or HPV18 infection. To define histopathological endpoints, a panel of expert pathologists will review all histopathological material collected during the course of our trial. This expert panel review will supercede the initial local histopathological diagnosis for purposes of defining the primary endpoint for US FDA submission. Panel members will review histopathological material blinded to trial arm assignment and to HPV DNA status or other participant characteristics. They will also review specimens blinded to the interpretation given by other panel members. Should the initial independent assessment differ between panel members, adjudication will be performed by consensus. Additional details of the plan for histology review to define study outcomes are provided in Section 3.19 (Laboratory Tests). Women diagnosed with cytological evidence of HSIL but without histopathological confirmation of CIN2+ will not be considered for analysis of the primary endpoint.

HPV16 and HPV18 status will be determined by testing cervical cells collected into PreservCyt® (Cell preservative solution; Manufactured by Cytec Corporation, Boxborough, MA, USA) medium using PCR-based general primers (SPF<sub>10</sub>) followed by LiPA and HPV16 and HPV18 type-specific PCR-based primer systems. The algorithm for PCR-based testing is provided as [Appendix C](#). Additional details of the plan for HPV testing are provided in Section 3.19 (Laboratory Tests). For women who test positive for multiple HPV types, including HPV16 or HPV18, we will assume that HPV16 or HPV18 are associated with the CIN2+ lesions (i.e., will count as an outcome).

#### **3.13.2. Secondary Endpoints**

In addition to histopathologically confirmed CIN2+ and HPV16 and HPV18 infection, which are described above, other endpoints required to achieve the six secondary objectives of our trial are discussed below.

**CONFIDENTIAL**

NCI Protocol # 04-C-N191; GSK Protocol # 580299/009 (HPV-009)  
Amendment 5

To evaluate the safety of our vaccine (Secondary Objective #1), we plan to examine:

1. Occurrence and intensity of solicited local adverse events and occurrence (either onset or aggravation) of solicited general adverse events including urticaria within 60 (Amended: 31 Oct 2005) minutes after each vaccination and over all vaccinations combined.
2. Occurrence and intensity of solicited local adverse events and solicited general adverse events in a 10% random subset of participants on one day from Day 3 to Day 6 after each vaccination and over all vaccinations combined.
3. Occurrence of unsolicited AEs and SAEs throughout the entire study (Month 0 up to Month 48).
4. Outcome of all pregnancies.

To evaluate the duration of protection conferred by the candidate vaccine (Secondary Objective #2), we will examine the time to occurrence of incident cervical infection with HPV16 or HPV18 (by PCR). HPV16 and HPV18 infection will be defined as described in Section 3.19 of this protocol (Laboratory Tests).

To evaluate the efficacy of the candidate vaccine to protect against infection with any oncogenic HPV type (Secondary Objective #3), we will use as an endpoint histopathologically confirmed CIN2+ associated with infection by any oncogenic HPV type detected by PCR in the preceding cervical cytology specimen. Whenever oncogenic and non-oncogenic HPV types are detected in a woman diagnosed with CIN2+, we will assume that the lesion was caused by one of the oncogenic types detected. Additional details of the plans for histological assessment and HPV testing are provided in Section 3.19 (Laboratory Tests).

To more strictly evaluate whether the candidate vaccine protects against incident HPV16 or HPV18 associated CIN2+ among unexposed individuals (Secondary Objective #4), we will evaluate vaccine efficacy against the primary study endpoint while further restricting the evaluation to women who are HPV DNA (by PCR) negative at months 0 and 6 for the corresponding HPV type, seronegative by ELISA at month 0 for the corresponding HPV type, and who have evidence of HPV16 or HPV18 infection detected within the lesional component of the cervical tissue specimen by PCR. Details of the plans for HPV DNA and serologic testing are provided in Section 3.19 (Laboratory Tests).

To evaluate the efficacy of the candidate vaccine to protect against persistent infection with HPV16 or HPV18 (Secondary Objective #5), we will define as persistent infection any HPV16 or HPV18 infection that persists (same type persistence) for approximately 12 months or longer. The word “approximately” is used here because our annual visits can occur slightly less (or more) than 12 months apart based on our protocol-defined visit intervals (see Table 4). For women who are being followed at 6-month intervals, the intervening HPV result collected at the 6-monthly visit will also be required to be positive for the same HPV type for a woman to be defined as having a persistent HPV infection. Details of the plans for HPV testing are provided in Section 3.19 (Laboratory Tests).

**CONFIDENTIAL**

NCI Protocol # 04-C-N191; GSK Protocol # 580299/009 (HPV-009)  
Amendment 5

Finally, to confirm that immunogenicity in our population is comparable to that seen in previous Phase I/II trials and to define long-term immunogenicity of the candidate vaccine (Secondary Objective #6), we plan to measure HPV16 and HPV18 antibody levels by ELISA and V5/J4 monoclonal antibody inhibition EIA on blood specimens collected from the 600 women recruited into the immunogenicity subcohort of (Amended: 19 May 2006) our trial. Details of the serology testing plan are provided in Section 3.19 (Laboratory Tests)

### **3.13.3. Tertiary and Exploratory Endpoints (Amended: 13 Nov 2008)**

In addition to the primary and secondary endpoints listed above, NCI and Costa Rican investigators plan to evaluate numerous additional exploratory virological and immunological endpoints as surrogate endpoints in our trial. A full description of these endpoints is beyond the scope of this protocol, but includes:

- Persistent HPV16 or HPV18 infection at intervals other than the 12-month interval defined for secondary objective #5 and defined based on intratypic variant testing.
- High viral load HPV16 or HPV18 infection (whether transient or persistent).
- HPV16 or HPV18 VLP antibodies detected in serum by ELISA, pseudovirion neutralization, or other methods that might be developed during the course of the trial.
- HPV16 or HPV18 VLP antibodies detected in cervical secretions by ELISA or other methods that might be developed during the course of the trial.
- T-cell proliferative assays for HPV16 or HPV18 VLP.
- T-cell cytokine production assays for HPV16 or HPV18 VLP.
- T-cell cytotoxicity assays for HPV16 or HPV18 VLP.

### **3.14. Adverse Events Monitoring**

One of the major objectives of the present trial is to obtain additional information on the AEs associated with HPV16/18 VLP vaccination. While safety and immunogenicity trials in the United States and elsewhere have suggested the overall safety of the HPV16/18 VLP-based vaccine, rare AEs cannot be ruled out in these early phase studies given the relatively limited number of volunteers involved (approximately 690 individuals vaccinated at the time of study start with the GSK Biologicals candidate HPV16/18 VLP-based vaccine and approximately 2,200 individuals vaccinated at the time of study start with other VLP-based vaccines). (Amended: 13 Nov 2008) Thus, it is incumbent on those conducting large-scale efficacy trials to collect additional safety data. Criteria for defining AEs, SAEs, and examples of each are provided in [Appendix D](#).

Our plan to monitor all trial participants for solicited and unsolicited AEs (whether expected or unexpected) is summarized below.

**CONFIDENTIAL**

NCI Protocol # 04-C-N191; GSK Protocol # 580299/009 (HPV-009)  
Amendment 5

- **AEs occurring immediately following vaccination.** We will observe all vaccinees for at least 60 (Amended: 31 Oct 2005) minutes at the clinic following each vaccination with appropriate medical treatment readily available in case of a rare anaphylactic reaction. This will be performed under the supervision of trained medical staff. During this 60 (Amended: 31 Oct 2005) minute observation period, we will collect information on vaccine reactogenicity, including both solicited and unsolicited events, as summarized on the Vaccine Administration and Reactogenicity Monitoring (VAR) and AER (Amended: 31 Oct 2005) forms that are provided separately from this protocol.
- **AEs occurring in the week following vaccination.** We plan to visit a random sample of 10% of vaccinees once during the week following each vaccination to collect information on solicited AEs, unsolicited AEs, and use of study-provided acetaminophen. This visit will be conducted by a specially trained outreach health worker between Days 3 and 6 after each vaccination. The information collected during this visit is summarized on the Home Visit Reactogenicity Monitoring and AER (Amended: 31 Oct 2005) forms that are provided separately from this protocol.
- **Long-term active monitoring.** We will schedule all participants for annual clinic visits for a period of 4 years from enrollment. At the time of each clinic visit, we will collect information on long-term, unsolicited AEs, and SAEs. The clinic visit will be performed by a trained study doctor or nurse and will include a pelvic examination for sexually experienced women. The Post-Enrollment Eligibility Screener and Adverse Event Report forms will be used to document all reported AEs. These forms are provided separately from this protocol.
- **Long-term passive monitoring.** We will provide trial participants with a toll-free number that can be used at any time during our trial visit to report AEs to our trained emergency response team. Participants will be instructed to call this toll-free number should they have any medical problems, whether they think the problem is related or not to vaccination. The phone will be staffed 24 hours a day by a physician who will triage all calls and refer as needed. The AER (Amended: 29 Mar 2005) form will be used to document all AEs reported through this mechanism. This form is (Amended: 29 Mar 2005) provided separately from this protocol.
- **Monitoring pregnancy outcomes.** Information regarding pregnancies and their outcomes will be obtained at every follow-up visit performed during the trial. For women who are lost to follow-up, information will be captured via linkage to hospital records. We plan to document outcomes for all pregnancies occurring among vaccinees during the course of our study. For deliveries, we will review and abstract relevant information from standardized forms that are completed for each delivery at all hospitals in Costa Rica. Review will be conducted by trained abstractors from our staff at regional hospitals in Guanacaste and hospitals outside of Guanacaste to which women from Guanacaste are sometimes referred. Alternatively, the same information can be obtained from the “baby card” provided by the hospital to the mothers of newborns. Miscarriages (whether spontaneous or voluntary) resulting in hospitalizations or emergency room visits will be monitored as described below. Miscarriages occurring outside of a hospital setting will be documented by self-report during follow-up visits.



**CONFIDENTIAL**

NCI Protocol # 04-C-N191; GSK Protocol # 580299/009 (HPV-009)  
Amendment 5

- **Monitoring specific AEs of interest in offspring.** At the request of the Costa Rican IRB specific adverse events occurring in subject's offspring who were conceived within one month prior to first vaccination to one year after last vaccination will be reported at the final visit (Month 48). This includes the following medical event categories in the offspring:
  - Endocrinologic and metabolic conditions
  - Autoimmune diseases
  - Sensory impairment
  - Intellectual impairment
  - Death

The occurrence of these specific events in offspring will be included in the clinical database. A child case will be created and linked to the mother case. Medical judgment will be exercised in deciding whether any disorders/diseases reported in offspring are included in these specific categories and should be reported as appropriate. Of note congenital malformations in offspring, as per original protocol, are to be documented and reported as SAEs and included in the pregnancy outcome analysis. (Amended: 13 Nov 2008)

- **Monitoring of hospitalizations and emergency room visits.** Hospitalization listings from all hospitals and emergency rooms in our study area will be reviewed by trained study staff. Listings from selected hospitals outside of Guanacaste to which women from Guanacaste are referred will also be reviewed by our staff. This will allow us to identify women in our trial who are hospitalized during the study period and who might not have contacted us via the toll-free number listed above. Medical records from these women will be reviewed and abstracted to obtain detailed information about the condition that led to hospitalization and/or the emergency room visit. This source of information will be important for the small fraction of women (<10% based on 10 years of experience from our natural history study in 10,000 women in Guanacaste) that we expect to be lost to follow-up during our study.

All AEs reported on the AER form (Amended: 31 Oct 2005) will be followed through resolution by a staff physician. Non-serious AEs will be reviewed by a staff clinician before participant close-out; participants with ongoing conditions will be referred to the appropriate referral center if needed. (Amended: 13 Nov 2008) AEs will be evaluated for their intensity, seriousness, and relationship to vaccination. In addition, the nature of each event (including a diagnosis using the ICD-10 coding structure), date and time of onset (where appropriate), and outcome (including resolution date) will also be documented. As outlined in [Appendix D](#), all SAEs, regardless of expectedness will be reported by one of the Costa Rican investigators to the NCI Medical Monitor (who will in turn report to the DSMB) and the GSK safety group, in a timely manner, in compliance with FDA regulations (21 CFR 312.32). Definitions of seriousness, relationship to vaccination, intensity, and the procedures for and timing of reporting AEs are also provided in [Appendix D](#).



It should be noted that all medical staff will receive special training to respond to clinical emergencies. Emergency resuscitation equipment will also be available at all study clinics.

### **3.15. Clinical Procedures**

#### **3.15.1. Overview**

All participants are expected to have at least seven visits over the course of our trial (see also [Table 2](#)). This will include:

- An initial enrollment visit, at which time potential participants will be screened for eligibility, will be randomly assigned to one of two arms, and will receive their first vaccination
- Two clinic visits for the administration of additional vaccine doses (one and six months following the enrollment visit)
- A clinic visit will be conducted at seven months on a subset of (Amended: 19 May 2006) 600 women enrolled to allow for immunogenicity assessment a minimum of 30 days following the last vaccination
- Four long-term follow-up clinic visits at yearly intervals starting 12 months after enrollment, and continuing through their four-year anniversary

In addition to the clinic visits listed above, women diagnosed with ASC-US+/LSIL at entry or during follow-up will be followed at six-month intervals and referred for colposcopic evaluation if the lesion persists for six months or longer. Also, women found to have prevalent or incident HSIL or cancer at any time during the study will be referred for colposcopic evaluation and excisional treatment, if necessary.

### **3.16. Enrollment Physical Examination**

Women selected for the trial will be invited to visit one of the study clinics to participate in the trial. At the time of the initial clinic visit, medical history information will be obtained and a complete physical examination will be performed to determine the overall health status and eligibility for the study. The Enrollment General Physical Exam and Medical History form that will be used to record results from this examination is provided separately from this protocol.

Immediately preceding the physical examination, and before each vaccination (at 0, 1, and 6 months), all participants will be asked to collect urine specimens for a urine pregnancy test. Only women with a negative pregnancy test and who report use of an acceptable form of birth control for at least 30 days and a willingness to continue use of an acceptable form of birth control until 60 days after the last dose of vaccine is administered (i.e., for the first eight months of the trial) will be enrolled. The enrollment of women who are pregnant will be deferred until they are at least three months post-partum and no longer breastfeeding.

### 3.16.1. Pelvic Examinations

Pelvic examinations will be performed at enrollment and during follow-up visits, starting at 12 months (i.e., at 12, 24, 36, and 48 months). These examinations will be performed to permit a visual examination of the external genitalia and cervix, to collect cells for cytology and HPV DNA testing (and for *C. trachomatis* and *N. gonorrhoeae* testing by Hybrid Capture at the first pelvic exam), and to collect cervical secretions for HPV antibody and other testing. Conditions identified during these procedures will be documented on the appropriate CRF and will result in treatment by study staff or referral to the Costa Rican National Social Security Administration Health System. No pelvic examinations will be performed on virginal women and these women will be assumed to be HPV and SIL negative, since virginal women are known to be at extremely low risk of HPV infection and SIL. The low rates of exposure to HPV among virginal women in Guanacaste have been confirmed by serological testing of self-reported virginal women in our natural history study. No pelvic examinations will be performed on pregnant women, as discussed previously. Pregnant women will have their enrollment and/or follow-up visits deferred until they are at least three months post-partum. During enrollment, women who are more than three months post-partum but still breastfeeding will also be deferred until they are no longer breastfeeding.

The enrollment pelvic examination will be performed to assess whether a woman has prevalent HPV infection and/or ASC-US/SIL at baseline. As discussed earlier, cytological findings at entry will not be used to determine eligibility for vaccination. However, women with advanced disease (defined as women with suspected or confirmed HSIL and/or cancer and those with lesions of glandular origin) will be referred for colposcopic examination and, if confirmed, the lesion will be treated. Women with evidence of advanced disease during the first six months of the trial will receive no additional vaccinations until after colposcopic assessment and treatment (if necessary), but will continue to be followed for the duration of the trial, as described in the next section. Also, the presence of HPV16 or HPV18 DNA, antibodies to HPV16 or HPV18, and/or ASC-US/LSIL at entry will not result in exclusion from the trial, but assessment of baseline status is important to permit planned primary and secondary analyses restricted to individuals uninfected with HPV16 or HPV18 at entry (see Section 4).

While a pelvic examination will not be performed on women at their six month visit (unless there is evidence of ASC-US+/LSIL at the enrollment visit, as discussed below), a self-administered cervicovaginal cell collection will be performed at this visit to collect cells for HPV DNA testing. This will allow for a separate evaluation of women who develop incident HPV infection before the full vaccination schedule is completed. This will be important to determine whether vaccination failures are more likely before all vaccine doses are administered and “maximal” immunological protection is achieved. The self-administered collection proposed for our trial has previously been compared against clinician-administered collections and the two types of collection were found to correlate very well (88.1% agreement; kappa = 0.73) [Gravitt, 2001]. To ensure that self-administered specimens collected during our trial are comparable to clinician-administered sampling for HPV DNA testing, we plan a re-evaluation of these two collection methods within the context of our trial. Both specimen types will be collected and tested for HPV DNA (by PCR) from the subset of women in our trial who require a

pelvic examination at their six-month visit due to evidence of ASC-US+/LSIL at the enrollment visit.

Follow-up pelvic examinations conducted at 12, 24, 36, and 48 months will permit active surveillance of trial participants for the primary and secondary outcomes of our trial. As mentioned previously, additional pelvic examinations at six-month intervals will be scheduled for women with cytological evidence of ASC-US+/LSIL at any of the routine annual screening visits ([Appendix A](#)). Women whose ASC-US+/LSIL lesion persists for six months or longer will be referred for colposcopic evaluation and excisional treatment, if needed.

Cytological specimens obtained during pelvic examinations will be reviewed as described in the Laboratory Tests section of this protocol (Section [3.19](#)).

### **3.16.2. Referral for Colposcopic Evaluation**

To assure prompt treatment of precancerous lesions of trial participants, women with cytological evidence of ASC-H by cytology, HSIL/cancer by cytology, with evidence of a glandular lesion by cytology, or with visual abnormalities suggestive of cancer will be rapidly referred for colposcopic evaluation and excisional treatment, if needed ([Appendix A](#)). If all doses of the vaccine have not been completed at the time the diagnosis of one of these advanced conditions is made, the woman will not receive any additional vaccinations until after colposcopic evaluation and treatment (if needed) is completed. Women referred for colposcopic evaluation (regardless of treatment) will continue to be followed actively throughout the four-year trial period to assure adequate clinical management and to collect information on potential vaccine AEs. These women will be followed at six-month intervals until there is evidence of persistent or progressive disease, or they have three consecutive normal screening visits.

Women with cytological evidence of ASC-US+/LSIL at any point during the trial will be seen for repeat screening visits every six months ([Appendix A](#)). Should the cytological abnormality persist for two visits (whether consecutive or not), these women will be referred for colposcopic evaluation and excisional treatment, if needed. As was the case for women diagnosed with advanced disease (ASC-H/HSIL/glandular lesions/cancer), those who have persistent ASC-US+/LSIL and are referred for colposcopic evaluation will continue to be followed actively at six-month intervals until there is evidence of persistent or progressive disease, or they have three consecutive normal screening visits.

Biopsy and LEEP specimens obtained during the trial will be retrieved for histopathological review by the study pathologists in Costa Rica and the NCI, as described in the Laboratory Tests section (Section [3.19](#)). These histopathological specimens will also be used for research purposes.

### **3.16.3. Exiting Women from the Trial (Amended: 13 Nov 2008)**

At the Month 48 visit we will apply the same criteria applied throughout the trial to define women who require colposcopic evaluation. Specifically, all women with evidence of cancer, HSIL, glandular lesions, AGC, ASC-H, or persistent ASC-US+/LSIL will be

referred to colposcopy. Close-out of individual study participants will only occur after colposcopy referral, for women who require such referral. See [Appendix A](#) for more details.

It should be noted, that after participant close-out, participants will be offered additional clinical care if needed. Case management after study close-out will be defined under a separate protocol.

***Activities at study completion (Amended: 10 September 2009)***

***The Data and Safety Monitoring Board (DSMB) for our trial has recommended cross-over immunization of both treatment and control recipients. The participants who received the HPV vaccine will be offered vaccination against hepatitis A and hepatitis B and participants who received the control vaccine will be offered vaccination against HPV-16/18 and hepatitis B, as appropriate. Vaccines to be used during cross-over immunization are the formulations licensed for use in Costa Rica. Cross-over immunization will be implemented by NCI and Costa Rican investigators under a separate protocol they have developed.***

***Implementation of cross-over immunization will require unblinding. Unblinding information and cross-over will not be offered to participants until they have been exited (closed out) from the present study and their data for this study have been frozen in the study databases. Exiting of participants in the trial will occur in an ongoing/batched manner as participants complete their 4-year participation in our study and after ongoing SAEs or pregnancies are resolved, or on October 3, 2010 (10 months after the 4-year anniversary for the last woman enrolled), whichever comes first. This will ensure that study blind is maintained for individual participants until their data for the final analysis is frozen.***

***If cross-over immunization cannot be offered to a subject (e.g., because of medical reasons) or the subject refuses cross-over immunization, unblinding information will be provided after the participant has exited the current study and her data has been frozen. This will occur at the time of the first cross-over implementation visit, at which time participation/eligibility for cross-over immunization will be determined.***

### **3.17. Other Procedures and Data Collection**

#### **3.17.1. Overview**

In addition to the clinical examinations described above, the following data and specimen collection is planned:

- Interviews at enrollment and during follow-up to ascertain information regarding HPV exposure risk (i.e., sexual behavior) and other socio-demographic, behavioral and exogenous factors that are either believed to be associated with the development of SIL or thought to potentially modulate the immune response to vaccination.
- Blood specimens will be collected at every clinic visit for HPV antibody testing and testing for other SIL risk factors (e.g., other sexually transmitted diseases) and/or

**CONFIDENTIAL**

NCI Protocol # 04-C-N191; GSK Protocol # 580299/009 (HPV-009)  
Amendment 5

factors postulated to modulate immune response to vaccination (e.g., HLA typing and T-cell responses to HPV). Blood specimens collected at the enrollment visit will also be used to perform a hematocrit as a benefit to participants.

- Oral, anal and vulvar specimen collection at the 48-month visit is being added to allow for the evaluation of the effect of vaccination on oral, anal, and vulvar HPV infection rates. (Amended: 13 Nov 2008)

It should be noted that, for sexually experienced women, both the interview and blood collection will be deferred whenever a woman's pelvic examination is deferred (e.g., due to pregnancy).

### **3.17.2. Interview Questionnaires**

A brief, 10-15 minute questionnaire will be administered to all participants at enrollment. This questionnaire will assess information on factors believed to be associated with either SIL or immune response to vaccination. More specifically, the questionnaire will obtain information on:

- Socio-demographic factors
- Sexual history
- Reproductive behavior
- Contraceptive practices
- Cigarette smoking
- Family history.

A copy of the study enrollment questionnaire is provided separately from this protocol.

During follow-up (starting at the six month visit), additional questionnaires will be administered to participants at each clinic visit to ascertain changes in the factors listed above. Should some of the specific ancillary studies listed above be approved, additional questions relating to the specific hypotheses being addressed in the ancillary studies may also be added. A copy of the study follow-up questionnaire is provided separately from this protocol.

### **3.17.3. Blood Collection**

Blood specimens will also be collected from all participants at each of the clinic visits (see [Table 2](#)). The major purpose of these blood collections will be to monitor immune response to vaccination, both humoral (i.e., antibody) and cell-mediated (i.e., T-cells). Aliquots of plasma, serum, buffy coat, peripheral blood mononuclear cells (PBMCs) and red blood cells (RBCs) will also be saved for other research-based assays, including antibody tests against sexually transmitted diseases other than HPV, hormone assays, nutritional assays (particularly those nutrients believed to impact the immune response), host DNA testing (to evaluate host susceptibility factors associated with SIL and the

**CONFIDENTIAL**

NCI Protocol # 04-C-N191; GSK Protocol # 580299/009 (HPV-009)  
Amendment 5

immune response to vaccination, such as HLA), and others. The blood specimen collected at study entry will also be used to perform a hematocrit as a benefit to participants. Women with evidence of anemia will be provided appropriate initial treatment and referral to the Social Security system.

Three types of blood draws are planned. These include the collection of 3 mL of blood for hematocrit testing (done as a benefit to participants), 10-20 mL of blood that will be kept cool after collection and processed locally within a few hours of collection, and the collection of an additional 40 mL of blood on a subset of participants that will be kept at room temperature and shipped overnight to a specialized laboratory set up to cryopreserve viable lymphocytes. The 3 mL blood draw will be obtained at enrollment only. The 10-20 mL blood draw will be collected from all participants at all clinic visits (20 mL at the enrollment and exit visits and 10 mL at all other intervening visits) and will be used for HPV antibody, host DNA, hormonal, nutritional, and other research-based assays. The 40 mL blood draw will be collected to allow for cryopreservation of PBMCs required to perform functional immunological testing planned as part of efforts by NCI and Costa Rican investigators to monitor the immune response of trial participants. This third blood draw will be collected for ancillary research purposes on a subset of participants, including a random sample of 10% of participants at enrollment and at their 12 and 36 month visits (to document the distribution of the immune responses in our population before and after vaccination), women referred to accelerated screening visits at six-month intervals *through March 31, 2009 (Amended: 10 September 2009)* (this group would have the additional blood sample collected annually), women who are referred for colposcopic evaluation and require a biopsy or LEEP, and women enrolled in the immunogenicity subcohort of our trial after March 1, 2006. (Amended: 19 May 2006) While the primary focus of this larger blood draw will be on the cryopreservation of PBMCs for immunological monitoring, residual plasma will also be saved for use in possible future assays.

While the primary focus of this larger blood draw will be on the cryopreservation of PBMCs for immunological monitoring, residual plasma will also be saved for use in possible future assays.

To assure that participation and retention rates in our trial are not negatively affected by the blood draws, refusal to have blood collected will not result in exclusion from the trial.

#### **3.17.4. Extra-Cervical Collection**

Oral, anal and vulvar specimen collection at the 48-month visit is being added to allow for the evaluation of the effect of vaccination on oral, anal, and vulvar HPV infection rates. Prior to the pelvic exam, an oral specimen will be collected. During the pelvic examination, a vulvar and an anal specimen will be collected prior to cervical sampling. Each specimen will be collected according to a standard procedure and will be stored in separate tubes. (Amended: 13 Nov 2008)



### 3.18. Biospecimen Processing, Storage, & Shipment

Collection of numerous types of biological specimens is planned, as mentioned in previous Sections. The types of specimens we propose to collect and plans for processing, storage and shipment are summarized in this Section.

The individual types of specimens we propose to collect and the expected number of aliquots resultant from this collection and requiring storage/shipment are summarized in [Table 5](#) to allow NCI to plan for adequate repository space at its main repository in Maryland, USA. In brief, we propose to collect cervical cells for liquid-based cytology, additional cervical cells for HPV DNA, RNA and other testing, cervical secretions for immunological assessment, cytological material (slides) for evaluation, histopathological material (blocks and slides) for review and testing, and blood for various immunological and other research-based tests, and oral, anal and vulvar samples (Amended: 13 Nov 2008). We have had experience collecting all of these biological specimens in Costa Rica on several thousand women over more than seven years as part of our natural history study.

Several biological specimens we propose to collect require little or no processing and can be stored at air-conditioned room temperature until shipment to the USA. These include the cells for liquid-based cytology and cytopathological materials. Other specimens require little or no processing but need to be frozen on the day of collection. These include the cervical cells for HPV DNA and RNA testing, and cervical secretions, and oral, anal and vulvar samples (Amended: 13 Nov 2008).

**Table 5 Types of Biological Specimens Proposed and Expected Storage Requirements (Amended: 13 Nov 2008)**

| Specimen Type                         | # per Woman | Size         | Total #* |
|---------------------------------------|-------------|--------------|----------|
| Cervical Cells (Liquid Cytology/HPV)  | 6           | 25 mL vial   | 45,000   |
| Cervical Cells (Research)             | 6           | 10 mL vial   | 45,000   |
| Cervical Secretions                   | 5           | 10 mL vial   | 37,500   |
| Blood                                 | 70          | 1-2 mL vials | 525,000  |
| Tissue Slides<br>(Cytology/Pathology) | 6.25        | Slides       | 46,875   |
| Tissue Blocks                         | .25         | Blocks       | 1,875    |
| Oral Samples                          | 1-3         | 20 mL vial   | 7,500    |
| Anal Samples                          | 1           | 1 mL vial    | 7,500    |
| Vulvar Samples                        | 1           | 1 mL vial    | 7,500    |

\* Assuming 7,500 participants (repository estimation purposes; does not take drop-outs into account)

Blood specimens will require more extensive processing. For all participants at enrollment and during follow-up, we propose to collect 10-20 mL of blood and to separate and store its various components (plasma, serum, buffy coat, and red blood cells). Processing of these specimens will be performed by trained personnel on site who are devoted to this task. They will use specific Standard Operating Procedures (SOPs) developed for our trial.

Finally, we propose to collect additional blood specimens on a random sample of participants to permit cryopreservation of lymphocytes for use in functional

**CONFIDENTIAL**

NCI Protocol # 04-C-N191; GSK Protocol # 580299/009 (HPV-009)

Amendment 5

immunological and other testing. Cryopreservation of lymphocytes is technically more challenging than the separation of whole blood into its components, and so collaborative arrangements have been established with investigators at the University of Costa Rica in San Jose to have specimens from our trial cryopreserved. We will have specimens requiring cryopreservation transported daily by a study driver to a university lab devoted to the processing of our trial specimens. Trained personnel will utilize the separation and cryopreservation procedures established by Biotech Research Laboratories, and used widely on other DCEG studies including our Costa Rican natural history study. Standardized SOPs have been developed for use by the processing laboratory.

Biological specimens collected during our trial will be temporarily stored in a repository located adjacent to the trial administrative offices. This repository is outfitted with air conditioning, a walk-in refrigerator, and various liquid nitrogen tanks, and is staffed by trained personnel devoted to maintaining the repository.

Shipment of biological specimens will be performed periodically to one of the NCI repositories in Maryland, USA and further distributed, as needed, to collaborating laboratories for testing. Materials that can be stored at room temperature will be shipped on a monthly basis by air. Shipments will be made by cargo plane, since some of the materials being shipped contain methanol and are considered flammable. Materials that need to be stored frozen will be shipped in liquid nitrogen tanks. Given the large volume of specimens to be shipped as part of our study, we plan to have frozen specimens shipped in large liquid nitrogen tanks that are specifically manufactured to allow for air transport. A specialized shipping and customs agent will be responsible for these shipments. The agent we propose to use has been responsible for the successful shipment of biological specimens collected during our natural history study. Hundreds of shipments have been made from Costa Rica since 1993, and to date only one shipment (in the early phase of our study) was lost in transit.

### **3.19. Laboratory Tests**

#### **3.19.1. Cytology**

Cervical cytology will be performed using the *ThinPrep* PapTest™ (Cytoc Corporation, Boxborough, MA, USA). Cervical cells for *ThinPrep* cytology will be collected at each clinic visit where a pelvic exam is performed using a Cervex® brush (Rovers Medical Devices BV, Oss, The Netherlands) rinsed into a collection vial containing *PreservCyt* medium. Two 0.5 mL aliquots of the 20 mL in the *PreservCyt* vial will be withdrawn for PCR testing (see below), prior to preparation of *ThinPrep* slides using the *ThinPrep* 2000 Processor. *ThinPrep* slides will be prepared by qualified trial staff at the local cytology staining laboratory, will be screened sequentially by two cytotechnologists specifically trained to screen *ThinPrep* slides, and will be interpreted by the Costa Rican study cytopathologist, Mario Alfaro, using the Bethesda 2001 classification system.

The clinical management of the study participants will rely on the Costa Rican cytopathology interpretation, with the exception of HSIL noted below. As part of NCI's ongoing quality control efforts (led by cytotechnologist Claire Eklund and pathologist Martha Hutchinson who are affiliated with the Women's and Infants' Hospital in



**CONFIDENTIAL**

NCI Protocol # 04-C-N191; GSK Protocol # 580299/009 (HPV-009)  
Amendment 5

Providence, RI), all slides that read as abnormal in Costa Rica and a 10% sample of the slides read as negative in Costa Rica will be re-screened and re-interpreted in the United States. At the study exit (Month 48), in addition to 100% of slides read as abnormal in Costa Rica and 10% of the slides read as negative in Costa Rica mentioned above, 100% of slides that are read in Costa Rica as negative with evidence of reactive changes and that are concurrently HPV positive by the HCII will be re-interpreted in the United States. (Amended: 13 Nov 2008) The 10% set of negatives selected for evaluation in the United States will be randomly selected, without replacement. This scheme will result in approximately 50% of subjects with a negative cytology having an expert review over the course of the 4-year study follow-up period. The purpose of this review is to maximize the accuracy of the Costa Rican interpretations and the comparability of the Costa Rican readings to a US standard, realizing nonetheless that cytopathology is inherently and unavoidably subjective to some extent and that there is no absolute reference standard of cytopathology, particularly for equivocal interpretations such as ASC-US.

The cytological interpretation given by the Costa Rican cytopathologist will be used in clinical management and in the analysis, with one exception. In cases where the Costa Rican interpretation is <HSIL and the US interpretation is HSIL or more severe disease, the interpretation from the US will be communicated to Costa Rica, entered into the CRF, and will lead to colposcopic referral. Also, for clinical management purposes, should *ThinPrep* slides be inadequate for interpretation (estimate <2%), the subject will be managed as if she were LSIL positive, rather than delay management by recall of the patient for repeat cytology.

### **3.19.2. Histology**

(to define trial endpoints)

Biopsy and excisional treatment (loop electrosurgical excisional procedure, or LEEP) specimens obtained during the trial will be fixed in buffered formalin, and sent to the Costa Rican pathologist, Diego Guillen, for processing and diagnosis. LEEP specimens will be sectioned extensively, and up to three levels will be cut from each block. The diagnosis made by the Costa Rican pathologist will be used to determine clinical management of participants.

In addition to the Costa Rican diagnosis, *an* NCI *designated* pathologist (Amended: 13 Nov 2008, **Amended: 10 September 2009**) with expertise in cervical pathology will periodically diagnose all histological specimens, blinded to the initial Costa Rican diagnosis. If the diagnoses are concordant (concordance will be required at the level of negative or atypical metaplasia/CIN1/CIN2/CIN3 or *in situ*/cancer), that will establish the NCI provisional study diagnosis. Discrepant findings between the Costa Rican and NCI pathologist will lead to review by the second NCI pathologist. Agreement between two of the three pathologists at the <CIN2/CIN2+ level will establish the NCI study diagnosis. These diagnoses will not be available within a timeframe that would allow their use for clinical management purposes. Therefore, NCI pathology review will be performed to define histological diagnoses for analysis purposes. This review process and its results will be performed and documented in the US. A copy of the results of the US pathology review will be sent to the clinical staff in Costa Rica. Periodic review of proficiency slide

sets will be performed throughout the trial to assure comparability of the Costa Rican/NCI panel consensus readings against other expert pathologists involved in HPV vaccine studies.

The primary trial endpoint is CIN2+ (associated with HPV16 and/or HPV18). CIN2 and CIN3 will be separately diagnosed for scientific interest, but combined as study endpoints. No cancers are anticipated and, in our experience in Guanacaste, adenocarcinoma *in situ* will be extremely rare. If these rare outcomes do occur, they will be included as cases.

### 3.19.3. PCR typing of HPV DNA from *PreservCyt* specimens

(to define trial endpoints)

Two 0.5 mL aliquots of *PreservCyt* specimens will be withdrawn *prior* to *ThinPrep* preparation to avoid possible specimen-to-specimen contamination. The removal of the two small aliquots is not expected to impact on the cellular adequacy of the *PreservCyt* specimen, which typically contains many more cells than required for a *ThinPrep* and subsequent Hybrid Capture® 2 (a signal amplification assay; manufactured by Digene Corporation, Gaithersburg, MD, USA) (HCII HPV DNA test) testing.

The PCR testing used to establish the presence of HPV16 and/or HPV18 for the efficacy endpoints will be performed by GSK Biologicals or DDL Diagnostic Laboratories (Amended: 13 Nov 2008) on one *PreservCyt* aliquot, as follows (see also [Appendix C](#)).

To test for HPV DNA positivity, GSK Biologicals or DDL Diagnostic Laboratories (Amended: 13 Nov 2008) will use SPF<sub>10</sub> primers that amplify a 65 nucleotide region of the HPV L1 gene for most of the known HPV isolates. The read-out for this test is a DNA enzyme linked immunoassay. Positive specimens will be typed by reverse hybridization line probe assay (LiPA) using 25 type-specific hybridization probes (14 oncogenic HPV types [HPV types 16, 18, 31, 33, 35, 39, 45, 51, 52, 56, 58, 59, 66, and 68] and 11 non-oncogenic HPV types [HPV types 6, 11, 34, 40, 42, 43, 44, 53, 54, 70, and 74]). If LiPA detects no HPV16, the specimen will be tested by HPV16 specific PCR using primers that amplify a 92 nucleotide segment of the E6/E7 gene. If LiPA detects no HPV18, the specimen will be tested by HPV18 specific PCR using primers that amplify a 126 nucleotide segment of the L1 gene. Redundant testing using general PCR with LiPA, followed by type-specific PCR to confirm absent HPV16 and HPV18 affords maximum test sensitivity while preserving high specificity. To monitor laboratory reproducibility, NCI will insert masked QC replicates in each batch sent for testing. The results of this testing algorithm will be considered definitive for all HPV16 and HPV18 related study endpoints.

In order to establish the presence of an HPV type other than HPV16 or HPV18, the second 0.5 mL aliquot of *PreservCyt* will be sent by NCI to a collaborating contract laboratory to test for a full range of genital HPV types using PGMY primers and reverse line blot typing assay (LBA). To monitor laboratory reproducibility, NCI will insert masked QC replicates in each batch sent for testing. Samples positive for HPV types

**CONFIDENTIAL**

NCI Protocol # 04-C-N191; GSK Protocol # 580299/009 (HPV-009)  
Amendment 5

other than HPV16 and HPV18 in either the PGMY/LBA or SPF/LiPA assay will be considered as HPV positive for the appropriate other HPV type.

**3.19.4. PCR typing of HPV DNA from histopathological specimens**

(to define outcome for secondary objective #4 defined in Section 2.3.)

Tissue-based HPV PCR testing will be performed on sections obtained from formalin-fixed & paraffin-embedded tissue specimens collected from participants referred to colposcopy who are found to have histopathological evidence of CIN2+.

Clean techniques will be implemented when sectioning tissue blocks to avoid contamination. Furthermore, lesional material will be selected for analysis using micro-dissection techniques, as appropriate. Testing will be performed at a laboratory designated by NCI and GSK Biologicals after assay validation.

To test for HPV DNA, SPF<sub>10</sub> primers which amplify a 65 nucleotide region of the HPV L1 gene for most of the known HPV isolates will be used. The read-out for this test is a DNA enzyme linked immunoassay. Positive specimens will be typed by reverse hybridization line probe assay (LiPA), using 25 type-specific hybridization probes. This typing process enables detection of 14 oncogenic HPV types (HPV-16, 18, 31, 33, 35, 39, 45, 51, 52, 56, 58, 59, 66 and 68) and 11 non-oncogenic HPV types (HPV-6, 11, 34, 40, 42, 43, 44, 53, 54, 70 and 74). If LiPA detects no HPV16, the specimen will be tested by HPV16 specific PCR using primers that amplify a 92 nucleotide segment of the E6/E7 gene. If LiPA detects no HPV18, the specimen will be tested by HPV18 specific PCR using primers that amplify a 126 nucleotide segment of the L1 gene. Redundant testing using generic PCR with LiPA, followed by type-specific PCR to confirm absence of HPV-16 and HPV-18 affords maximum test sensitivity while preserving high specificity. To monitor laboratory reproducibility, NCI will insert QC control specimens as appropriate. The results of this testing algorithm will be considered definitive for the study endpoint used to assess secondary objective #4 defined in Section 2.2

**3.19.5. HPV DNA Testing by *Hybrid Capture 2* (HCII)**

(for baseline/exit assessment and triage of ASC cytology)

After *ThinPrep* cytology slides have been prepared, residual *PreservCyt* specimens on slides read as ASC will be sent to the HPV DNA testing laboratory (Enrique Freer) at the University of Costa Rica for HPV testing using the *Hybrid Capture 2* test (HCII; Digene Corp., Gaithersburg, Maryland, USA). The assay uses a cocktail of labeled RNA probes (Probe B) designed to detect 13 oncogenic HPV types (HPV types 16, 18, 31, 33, 35, 39, 45, 51, 52, 56, 58, 59, and 68).

An ASC-US (Amended: 29 Mar 2005) cytologic interpretation will lead to “reflex” HCII testing and for the purposes of clinical management subjects who have HCII positive (or HCII-inadequate) ASC-US will be treated the same as an LSIL. Should residual *PreservCyt* material be insufficient for HCII testing, or should HCII testing fail for any

**CONFIDENTIAL**

NCI Protocol # 04-C-N191; GSK Protocol # 580299/009 (HPV-009)  
Amendment 5

other reason, specimens will be assumed to be HCII positive for clinical management purposes and treated accordingly (<5% expected).

HCII testing will also be performed on all subjects at baseline for NCI research purposes and at exit (Month 48 visit) to assist in defining the exit management strategy.

**3.19.6. Chlamydia trachomatis & Neisseria gonorrhoeae Testing (Hybrid Capture 2, HCII)**

(for baseline assessment)

*Hybrid Capture 2 CT/GC (Hybrid Capture 2 Chlamydia trachomatis and Neisseria gonorrhoeae*, Digene Corporation, Gaithersburg, Maryland, USA) is an assay used for the detection of *Chlamydia trachomatis* and *Neisseria gonorrhoeae* in cervical specimens. The test uses specific RNA probes to detect *Chlamydia trachomatis* and *Neisseria gonorrhoeae* DNA in cervical specimens. The RNA/DNA hybrids are detected using a monoclonal antibody specific for RNA/DNA hybrids and readouts are made using chemiluminescent markers.

Testing will be performed according to the manufacturer's specifications at the time of each woman's first pelvic examination for NCI research purposes and as a benefit to study participants. The same cervical sample used for the HCII-HPV assay will be used for the HCII CT/GC assay.

**3.19.7. Serology Testing by ELISA**

Serological assays for HPV16/18 by ELISA will be performed at GSK Biologicals laboratories, Rixensart, Belgium or in a laboratory sponsored by the NCI in Costa Rica, pending validation. Baseline ELISA anti-HPV16 and anti-HPV18 testing will be performed on all women enrolled. In addition, anti-HPV16 and anti-HPV18 ELISA will be performed on all blood samples (Month 0 through Month 48) collected from the 600 women enrolled into the immunogenicity subcohort within the (Amended: 19 May 2006) trial. Women in this immunogenicity subcohort will have an extra clinic visit performed a minimum of 30 days following the last vaccination (Month 7 visit) to permit immunological assessment after all three vaccine doses are administered.

A 1 mL aliquot of serum obtained from 10 mL whole blood will be used for HPV16/18 serology testing. Quantitation of antibodies to HPV16 and HPV18 VLPs (anti-VLP-16 and anti-VLP-18) will be performed by ELISA using either HPV16 or HPV18 VLPs as coating antigens. ELISA titers of VLP-specific antibodies will be calculated relative to the optical density readings obtained with serial dilutions of a positive control pooled reference serum sample using a four-parameter equation. Midpoint titers (expressed in EL.U./mL) will be obtained by averaging the values from all dilutions that fall within the working range of the standard positive control titration curve.

In case of insufficient blood sample volume to perform assays for all antibodies, the samples will be analyzed according to the following priority ranking (ranked in order of decreasing priority):

1. HPV16 antibody (by ELISA)
2. HPV18 antibody (by ELISA).

Serology testing of follow-up specimens collected from women not included in the 600-woman immunogenicity subset or testing for additional antigens contained in the study vaccines will be performed if deemed necessary by the NCI, or if any findings in the present study or in other studies necessitate additional investigation of the immunogenicity of the vaccine. In this case, the ranking above may also be changed.

### **3.19.8. V5/J4 Monoclonal Inhibition Enzyme Immunoassay (EIA) Antibodies on a Subset of Subjects**

V5/J4 monoclonal inhibition EIA will be performed at GSK Biologicals laboratories, Rixensart, Belgium or in a laboratory designated by NCI and GSK Biologicals after assay validation on all blood samples (Month 0 through Month 48) collected from the 600 women enrolled into the immunogenicity subcohort of the trial.

These EIA inhibition assays are based on the indirect measure of serum antibodies specifically directed either against V5 or J4 epitopes that are described in the literature as the major neutralizing epitopes of HPV16 and HPV18, respectively.

These assays are based on the competitive test principle. Briefly, HPV16 or 18 VLPs are coated onto 96-well microplates, serial dilutions of human sera are added to the VLP-coated plates and incubated. After washing, biotinylated V5 or J4 monoclonal antibodies are added into the wells. The plate is washed and peroxidase (POD)-conjugated streptavidin is added. The binding of streptavidin is detected by the addition of tetra methyl benzidine (TMB). Colorimetric change induced will be inversely proportional to the concentration of anti-V5 or -J4 antibodies in the serum. ELISA titers are calculated from a reference curve using a four parameters equation and expressed in ELISA Units per milliliter (EU/mL).

### **3.19.9. Other Assays**

Several other laboratory assays will be performed for research purposes to enable exploratory analyses of tertiary objectives and ancillary studies.

## **3.20. Efforts to Maximize Participation/Retention**

Although a randomized clinical trial is the ideal method to assess the effectiveness of any intervention, it is well recognized that subject withdrawal or loss-to-follow-up subsequent to randomization can introduce bias if losses are differential in the different trial arms. Thus, issues of retention subsequent to enrollment are important and have been given emphasis in planning for the present trial.

Efforts aimed at minimizing withdrawal and losses during follow-up are listed below:

- Selection of Guanacaste as the trial site because of high participation and retention rates in previous studies.

**CONFIDENTIAL**

NCI Protocol # 04-C-N191; GSK Protocol # 580299/009 (HPV-009)  
Amendment 5

- Community outreach and education efforts are planned to assure that adequate information regarding the trial is disseminated throughout the region. These efforts will target both the population at large and the public health community in the region.
- We will invite 20,000 women to participate, but our power estimates (see [Table 6 Section 4.7](#)) indicate the need for 7,500 women (Amended: 13 Nov 2008). Only women who, in principle, agree to comply with the full protocol will be enrolled.
- We plan to send reminder letters before each appointment. For appointments preceding vaccination visits we will also send an outreach worker to the home of participants to remind them of their scheduled appointments.
- Reimbursement for transportation costs will be provided, if necessary and, when needed, transportation to the clinic in a study vehicle will be provided.
- Women who, at enrollment, have definite plans to move out of the study area within six months after enrollment will be excluded.
- Women who move within Guanacaste will be given the option to have their clinic assignment changed to a clinic closer to their new home. Women who work will also have the option to be seen at a clinic that is close to their work location. Several clinics throughout Guanacaste and surroundings will be used for our trial, allowing for such flexibility.
- Despite our attempt to exclude women with plans to migrate outside of our study region, some women are likely to move during the four-year study follow-up period. Women who move will be offered transportation or reimbursement of expenses to visit the nearest study clinic. During our Natural History Cohort study women who had migrated outside of Guanacaste often agreed to return to our clinics for their appointments.

Efforts described above should minimize withdrawals from the study prior to the completion of 48 months of follow-up. In the event that a woman withdraws from the study due to participant refusal, relocation, death, or other reason, the specific reason for withdrawal will be carefully specified on a CRF designed for this purpose. Discontinuation of vaccination (i.e., withdrawal from vaccination) will not constitute grounds for withdrawal from study follow-up. The occurrence of an AE will also not constitute grounds for withdrawal. However, should a woman choose to refuse further participation as a result of an AE, this will be carefully documented and all attempts will be made to track the AE to its resolution.

## **4. STATISTICAL ANALYSIS PLAN & POWER**

### **4.1. Overview**

The main analyses planned for our trial will be conducted by the NCI and Costa Rican investigators and will focus on the primary outcome, viz., HPV16 or HPV18 (combined) associated, histopathologically confirmed CIN2+ among uninfected individuals (i.e., HPV DNA negative for HPV16 or HPV18 at entry and at 6 months), as defined in

Section 2. The primary analyses will be based on the difference in the cumulative proportions of women who develop an outcome between the treatment group and the control group (i.e., difference between attack rates). The test statistic will be the Fisher's exact test for difference between two proportions. Analysis will be triggered by the total number of events observed, and will be conducted after at least 30 confirmed cases are observed and the last woman recruited into the study has completed a follow-up time of two years, pending review and approval of the final statistical analysis plan by the DSMB.

The primary analysis for this trial will be "According-to-Protocol" (ATP). The ATP analysis will exclude women otherwise eligible for the trial who do not receive all three doses of vaccine or who test positive for HPV16 and HPV18 DNA before or at the time of the last vaccination (scheduled for 6 months after randomization). An Intent-to-Treat (ITT) analysis is also planned to confirm ATP findings. For the ITT analysis, all women randomly assigned to one of the two study arms and confirmed by HPV DNA testing to be HPV16 or HPV18 negative at randomization will be included.

Secondary analyses for efficacy will be performed to examine duration of the effect of the vaccine in the prevention of incident infection with HPV16 or HPV18. These analyses will focus on events that occur at one, two, three, and four years after randomization in women who are under follow-up and had not previously had the event of interest. Additional secondary analyses will evaluate the efficacy of the candidate vaccine in the prevention of CIN2+ associated with all incident oncogenic HPV types including HPV16 and HPV18, in the prevention of persistent HPV16 or HPV18 infection (persistence defined as 12+ months of infection with same type infection). Analyses of the 600 women in the immunogenicity subset will also be performed and will focus on defining the serological antibody profile observed in vaccinated individuals over time.

Additional exploratory tertiary and ancillary analyses will be conducted by the NCI and Costa Rican investigators and will evaluate numerous issues, as described in the Tertiary Objectives and Ancillary Analyses & Studies sections of this protocol (Section 2.3 and Section 2.4).

No interim statistical analyses for *the primary efficacy endpoint* are planned at this time (*Amended: 10 September 2009*).

Adverse events (AEs) observed in the course of the trial will be carefully monitored. Both expected and unexpected AEs will be examined. Rates of specific solicited, unsolicited, and serious AEs (SAEs) will be compared by treatment arm and evaluated. These analyses will be performed throughout the trial by the DSMB (study personnel will remain blinded) and will not affect the overall alpha level of the study.

Power calculations are provided at the end of this section (Section 4.7). Assumptions inherent in our calculations are specified and are based largely on results of our ongoing population-based natural history study in Guanacaste. Assuming conservatively that 12,000 (6,000 per arm) of the 20,000 women invited to participate are randomly assigned to one of the two arms of the trial, we estimate an overall power of 91% to detect an 80% reduction in incidence of HPV16 or HPV18 (combined) associated CIN2+ over the four years of follow-up planned for this trial.



## 4.2. Primary Analysis for Efficacy

The primary analysis will assess the candidate vaccine's ability to protect against incident, histopathologically confirmed HPV16 or HPV18 associated CIN2+ among uninfected individuals (i.e., HPV DNA negative for HPV16 or HPV18 at entry and at 6 months). An expert panel of pathologists will review all histopathological specimens blinded to vaccination status to determine CIN2+ diagnoses. Presence of HPV16 or HPV18 DNA will be determined by testing cervical cells collected into liquid-based *PreservCyt* medium by PCR using the SPF<sub>10</sub> primers typed using the LiPA method and followed by HPV16 and HPV18 type-specific primers (Section 3.19). For women with multiple type infections including HPV16 or HPV18, we will assume that HPV16 or HPV18 is associated with the CIN2+ lesion.

Final analysis for Biologic License Application (BLA) submission will be triggered when one of the following sets of conditions is met:

- 48 months of follow-up per participant is achieved, or
- At least 30 confirmed cases of CIN2+ associated with HPV16 or HPV18 cervical infection that are eligible for the ATP analysis are observed and the last woman recruited into the study has completed a minimum follow-up period of two years, pending review and approval of the final statistical analysis plan by the DSMB. (Amended: 29 Mar 2005)

Assuming 15,000 women enroll, it is expected that a total of approximately 50 HPV16/18+ CIN2+ events will occur across both trial arms over the course of the trial under the null hypothesis. A minimum threshold for analysis of 30 events was chosen since this number of events would provide adequate power (96%) to observe a statistically significant difference between the two trial arms under the assumption of 80% efficacy (Table 6). The requirement of a minimum (Amended: 29 Mar 2005) follow-up time of two years was chosen to guard against analyses that are biased by early events only, which in the case of CIN2+ among young women might not be representative of true cancer precursors.

Should analysis occur prior to completion of the full 48 months of follow-up (under the second scenario above), women will continue to be followed through 48 months and an annex report will be issued to describe any additional data collected.

The main analysis of this primary endpoint will compare the cumulative proportions (i.e., attack rates) of women who develop an event among those who were randomly assigned to one of the two arms of the trial and found to be HPV16 or HPV18 DNA negative and without CIN2+ at baseline.

### 4.2.1. Baseline Characteristics

An initial evaluation will examine baseline characteristics (age, residence, education, virginity) of each trial group to assure comparability between groups.



#### **4.2.2. Exclusion from Analysis Based on Pre-Enrollment Testing**

Women will be tested at entry for the presence of HPV16 or HPV18 DNA; only those who test negative for HPV16 or HPV18 will be included in the main ATP and ITT analyses described below. Women infected with HPV16 and HPV18 DNA prior to vaccination will be excluded from the main analysis to focus the analysis on the prophylactic (not therapeutic) efficacy of our vaccine. All decisions about presence of HPV16/18 at baseline will be made by protocols that ensure blindness to assigned treatment arm and any information or materials collected at or subsequent to randomization.

#### **4.2.3. According to Protocol (ATP) Analysis**

The primary analysis will be an ATP analysis. Criteria for elimination from the ATP 3.3.4 analyses are listed in Section of this protocol. ATP analysis will be performed using a Fisher's exact test for equality of proportions. Kaplan Meier analysis will also be performed (see plans for secondary analyses below). The log-rank test is not being proposed for this primary analysis since a vaccine that significantly delays onset of the primary outcome without significantly affecting the cumulative difference in attack rates should not be considered an efficacious vaccine.

#### **4.2.4. Intent to Treat (ITT) Analysis**

An ITT analysis will also be performed to confirm the ATP findings. For the ITT analysis, all eligible women who consent and are randomly assigned to one of the two arms of the trial (and all events occurring after randomization) will be included, regardless of whether or not all three doses of the HPV16/18 VLP or control vaccine are administered.

### **4.3. Secondary Analyses for Efficacy**

#### **4.3.1. Duration of Protection**

An important objective of this trial is to evaluate the duration of protection provided by the candidate vaccine. Short-term protection from the vaccine is sufficient to provide evidence for efficacy and will constitute the primary justification for licensure. However, evidence of longer-term protection is necessary to justify vaccination as a viable alternative to currently available screening practices for the prophylaxis of cervical cancer, particularly in developing countries. Therefore, we will consider analyses aimed at evaluating long-term efficacy of the vaccine in the prevention of incident infection with HPV16 or HPV18. To this end, we plan to examine Kaplan Meier curves and stratified log-rank test among those free of the outcome (left-truncation) at one-, two- and three-years after completion of vaccination (for ATP analyses) and randomization (for ITT analyses).

#### **4.3.2. Protection against Any Oncogenic HPV Types**

An additional important secondary objective of our trial is to evaluate whether the candidate vaccine protects against incident CIN2+ associated with any oncogenic HPV type. Both ATP and ITT analyses will be conducted, using the same methods proposed for the primary and secondary analyses described above (i.e., comparison of attack rates and of Kaplan Meier curves).

#### **4.3.3. Protection against HPV16 or HPV18 Associated CIN2+ Among Women with no Evidence of Exposure to HPV16 or HPV18 at Entry**

To more stringently evaluate whether the candidate vaccine protects against incident, HPV16 or HPV18 associated CIN2+ among unexposed individuals, secondary analyses will be performed restricted to women who are not only HPV DNA (by PCR) negative at months 0 and 6, but also seronegative by ELISA at month 0 for the corresponding HPV type. In addition, HPV16 or HPV18 positivity will be defined by PCR on the lesional component of the cervical tissue specimen. Statistical analysis methods identical to those proposed for the primary analysis will be used for this purpose.

#### **4.3.4. Protection against Persistent HPV16 or HPV18 Infection**

To confirm published findings that immunization with VLP-based HPV vaccines protects against persistent infection, secondary analyses will also be performed to evaluate whether the candidate vaccine protects against long-term type-specific persistence (defined as 12+ months of infection) with HPV16 or HPV18. Both ATP and ITT analyses will be conducted, using the same methods proposed for the primary and secondary analyses described above (i.e., comparison of attack rates and of Kaplan Meier curves).

#### **4.3.5. Vaccine Immunogenicity**

To directly assess HPV16/18 VLP vaccine immunogenicity (as measured by anti-HPV16 and anti-HPV18 ELISA and V5/J4 monoclonal antibody tests) in our population, secondary analyses will be performed with the specific intent of confirming that HPV16 immunogenicity in our population mirrors that seen in other Phase I/II trials conducted to date, evaluating whether HPV18 immunogenicity seen after vaccination is comparable to that seen for HPV16, and evaluating patterns of antibody levels over time since vaccination.

### **4.4. Evaluation of Adverse Events (AEs)**

In addition to vaccine efficacy, we plan to carefully monitor and evaluate AEs observed in the course of the trial. Our plan for detecting, documenting, and classifying AEs is discussed in Section 3.14. In this section we describe our plans for evaluation of these AEs. Analysis of AE data will be based on the total vaccinated group without exclusions. An additional analysis of safety will be performed based on an ATP safety cohort. The ATP safety cohort will be defined as all subjects who have received at least one dose of

**CONFIDENTIAL**

NCI Protocol # 04-C-N191; GSK Protocol # 580299/009 (HPV-009)  
Amendment 5

study vaccine/control according to their randomization assignment (i.e., excluding individuals who received no vaccination or who received a vaccine other than the one specified by randomization), who did not receive a vaccine forbidden in the protocol, for whom the administration site is known, and for whom sufficient data is available to perform an analysis of safety. It should be noted that for these analyses to evaluate AEs, study personnel will not be unblinded, analyses will initially be presented to the DSMB by group without specifying which group is the vaccinated or control group, and unblinding of the groups by the DSMB will only occur at the request of the DSMB should safety issues arise.

Both expected AEs, as defined in the GSK Investigator Brochure, and unexpected AEs will be evaluated. Solicited, unsolicited, and serious AEs (SAEs) will be evaluated separately. AEs and SAEs will be evaluated throughout the study. SAEs will be reported to the DSMB immediately, whereas non-serious AEs will be summarized and reported to the DSMB on a periodic basis. Expedited reporting of SAEs to the US FDA, other national regulatory authorities, and Investigators will be performed by GSK, in accordance with relevant regulations. Details of the plan for US FDA reporting are provided in [Appendix D](#). Our plan for the analysis of AEs by the DSMB is summarized below.

1. Descriptive analysis will be performed to quantify the proportion (along with 95% confidence intervals) of vaccinated women who experience specific AEs. Solicited and unsolicited AEs will be tabulated separately by intensity. SAEs will also be evaluated separately. Relationship to vaccination will be examined. The proportion of individuals ever experiencing AEs and the proportion experiencing AEs at specific times (e.g., proportion of vaccinated women who experience pain at the injection site on the day of vaccination and in the week following vaccination) will be computed. Analysis stratified by dose number will also be performed.
2. The proportion of women who experience specific solicited AEs, unsolicited AEs, and SAEs will also be compared between the vaccinated group and the control group to determine whether there is evidence for significantly increased reactogenicity to the vaccine compared to control. Again, both cumulative and time-specific proportions will be computed, as will analysis stratified by dose number.
3. Pregnancies and pregnancy outcomes will be monitored throughout the study, and comparisons between the vaccine and control groups will be carried out in cumulative and time specific analyses.
4. Finally, since the incidence of new or exacerbated chronic illnesses with a possible immune pathogenesis is elevated among women 18-25 years of age, separate analyses will focus on an evaluation of new or exacerbated chronic illnesses such as autoimmune diseases (e.g., systemic lupus erythematosus, thyroiditis), insulin-dependent diabetes mellitus, and asthma. A similar approach to that described above will be used for this assessment.

#### 4.5. Other Analyses

In keeping with NCI's research mission, we plan multiple analyses to evaluate issues of scientific relevance to the research community in addition to the analyses summarized above. These include analyses of vaccine effects using Cox regression that are stratified by specific subpopulations (e.g., seronegative and seropositive individuals at entry; users and non-users of oral contraceptives), analyses restricted to women who are virgins at baseline and therefore have never been previously exposed to HPV16 or HPV18. NCI will also perform analyses that adjust for any effect of these factors if they are not distributed in a balanced way between vaccination groups despite randomization. Additional analyses will look at endpoints for evaluation of HPV16 and HPV18 effects separately, of the ability of the candidate vaccine to protect against transient and persistent infections with HPV16 and HPV18, and of the therapeutic effect of the candidate vaccine among HPV16 or HPV18 positive individuals at entry. The large size of the present trial (including the large number of women who will receive control vaccinations) also provides us the unique opportunity to evaluate various hypotheses related to the natural history of HPV infection and SIL and to immunological response to HPV and to HPV vaccination. These ancillary analyses will be performed by NCI and Costa Rican investigators to increase our knowledge of HPV, cervical neoplasia, and immune response rather than to evaluate the efficacy of the vaccines to protect against the primary trial outcomes. Therefore, although results from these analyses will be shared with the DSMB and with the research community as a whole, they will not necessarily be used to determine efficacy of the vaccine. A detailed description of these natural history and etiological analyses is beyond the scope of this protocol.

#### 4.6. Interim Analysis

There will be no restrictions on the number of analyses that can be conducted by the DSMB to examine safety of the candidate vaccine. Unscheduled analyses of safety may be conducted by the DSMB and will not affect the alpha for testing vaccine efficacy. Safety concerns with the vaccine shall constitute grounds for stopping enrollment or vaccination at any time during the trial.

No interim statistical analyses for efficacy *were* planned ***at the beginning of the trial (Amended: 10 September 2009)***. A need for an interim analysis for efficacy may arise during the trial. Should this occur, the study protocol will be amended, and the amendment submitted to the US FDA for review. To assist the DSMB in making decisions regarding interim analyses in the future, a set of guidelines are provided separately from this protocol in the DSMB Charter.

***A Statistical Analysis Plan (SAP) for initial analyses that focuses on virological endpoints has been submitted to the FDA. The analyses proposed within are largely exploratory in nature, but there is one overlap between an objective in the SAP for initial analysis and secondary objective #5 listed in this protocol (i.e., for secondary objective 5 listed in this protocol, we are proposing to conduct an interim analysis). Given this overlap, for secondary objective #5 listed in this protocol, the following alpha adjustment plan will be implemented: The overall alpha of 0.025 (one-sided) will***

*be split into 0.001 for the interim analysis proposed in the SAP for initial analyses and 0.024 for the final analysis. As specified in more detail in the SAP for initial analysis, power (assuming 80% vaccine efficacy and 20 or more total events) should remain above 85-90% for the final analysis of secondary objective #5 (Amended: 10 September 2009).*

*No stopping rule will be applied at this stage; blinding will be maintained and follow-up will continue for all subjects until Month 48 (Amended: 10 September 2009).*

#### **4.7. Power to Determine Vaccine Efficacy**

The powers of our trial to detect vaccine efficacy rates ranging from 30-90% and for sample sizes ranging from 10,000-15,000 are summarized in [Table 6](#). These calculations were performed using the PASS program (Hintze J. 2001. NCSS and PASS Number Cruncher Statistical Systems, Kaysville, UT, USA). The assumptions used in estimating power were based largely on results from our population-based natural history study in Guanacaste, Costa Rica [[Herrero](#), 2000] and from the British natural history study published by Woodman and colleagues [[Woodman](#), 2001]. We estimated the expected person-years and rates as follows for the ATP analysis assuming 15,000 women randomly assigned to one of the two arms of the trial:

- Person-years:** A total of 3,087 person-years/1,000 evaluable women are expected over the course of the four-years of follow-up in the control group. The expected person-years/1,000 evaluable women in the HPV16/18 VLP vaccine group is slightly higher (3,090/1,000 evaluable women) since we expect fewer CIN2+ events that terminate a woman's follow-up in the HPV16/18 VLP vaccine arm. These estimates account for the exclusion of person-years accrued:
  - by women in the first 6 months of the study (since events in that time are excluded from ATP analysis),
  - by women exposed to both HPV16 and HPV18 at entry or at the time of the third vaccination (month 6),
  - by women diagnosed with CIN2+ in the first 6 months of the study,
  - by women who do not receive all three doses of vaccine,
  - by women who are virginal since virginal women are not at risk of CIN2+,
  - by women who are lost to follow-up during the study
- Outcome Rates:** The expected rate of histopathologically confirmed CIN2+ associated with HPV16 or HPV18 occurring over the 42 months post third vaccination follow-up period among evaluable women is estimated to be 0.5% (.00238 annual rate of CIN2+ \* 0.6 proportion of CIN2+ associated with HPV16/18 \* 3.5 for 42 months of follow-up in ATP).

**CONFIDENTIAL**

NCI Protocol # 04-C-N191; GSK Protocol # 580299/009 (HPV-009)  
Amendment 5

To estimate the person-years and rates described above, the following specific assumptions were made, based largely on data from our natural history study in Costa Rica. All of the assumptions used to calculate power are conservative to avoid underpowering our study.

1. The annual incidence of histopathologically confirmed CIN2+ is estimated to be 0.238%.
2. The percent of non-virginal women with histopathologically confirmed CIN2+ at enrollment is estimated to be 1.5%.
3. The percent of CIN2+ with detectable HPV16 or HPV18 DNA is estimated to be 60%.
4. The proportion of women who are sexually inexperienced at entry is estimated to be 23.0%. The proportion of women who are sexually experienced at entry is estimated to be 77.0%.
5. The proportion of virginal women who initiate sexual activity during follow-up is estimated to be 43.2%. We assumed that initiation of sexual activity among virginal women at entry will occur evenly throughout the four years of follow-up.
6. The proportion of these sexually experienced women who are both HPV16 DNA positive and HPV18 DNA positive at entry is estimated to be 1%.
7. The proportion of sexually experienced women who remain HPV16 or HPV18 negative at the end of the vaccination phase (month 6) among those who are HPV16 and HPV18 DNA negative at entry is 98.5%.
8. The proportion of women diagnosed with CIN2+ in the first 6 months of the study is estimated to be 0.2%.
9. We expect that 10% of women will receive less than three vaccine doses.
10. Women will be followed for a total of four years from first vaccination.
11. We expect 10% of participants to be lost to follow-up during our study. The dropout rate is expected to be evenly distributed throughout the four years of follow-up.
12. Two-sided alpha of 0.05.

**CONFIDENTIAL**

NCI Protocol # 04-C-N191; GSK Protocol # 580299/009 (HPV-009)  
Amendment 5

**Table 6 Power to Determine Vaccine Efficacy in the Costa Rican Trial**

| Sample Size | Cumulative # HPV16/18 CIN2+ in control/vaccine arms |         | % Efficacy | Power* to exclude 0% Efficacy | Power* to exclude 30% Efficacy** |
|-------------|-----------------------------------------------------|---------|------------|-------------------------------|----------------------------------|
|             | Control                                             | Vaccine |            |                               |                                  |
| 10,000      | 17                                                  | 12      | 30%        | 16%                           | 2%                               |
| 12,000      | 20                                                  | 14      | 30%        | 18%                           | 2%                               |
| 15,000      | 25                                                  | 18      | 30%        | 21%                           | 2%                               |
| 10,000      | 17                                                  | 8       | 50%        | 39%                           | 12%                              |
| 12,000      | 20                                                  | 10      | 50%        | 45%                           | 14%                              |
| 15,000      | 25                                                  | 13      | 50%        | 53%                           | 16%                              |
| 10,000      | 17                                                  | 3       | 80%        | 85%                           | 55%                              |
| 12,000      | 20                                                  | 4       | 80%        | 91%                           | 63%                              |
| 15,000      | 25                                                  | 5       | 80%        | 96%                           | 73%                              |
| 10,000      | 17                                                  | 2       | 90%        | 94%                           | 67%                              |
| 12,000      | 20                                                  | 2       | 90%        | 97%                           | 75%                              |
| 15,000      | 25                                                  | 3       | 90%        | 99%                           | 84%                              |

\*Alpha (2-sided) = 0.05.

\*\*Power calculations to exclude efficacy of 30% were performed using an NCI Matrix Laboratory (MATLAB®, Mathworks, Inc.)-based program.

Total accrual into the Costa Rica Trial (HPV-009) was lower than initial estimates. For the outcome of histological CIN2+ (expected # events = 24), the final accrual of 7,466 provides 91% power to detect a vaccine efficacy of 80% under the following assumptions:

- 1) cumulative incidence of histopathologically confirmed CIN2+ associated with HPV-16 or HPV-18 of 0.79% (Woodman, 2001)
- 2) percent of non-virginal women with histologically confirmed CIN2+ at enrolment of 1.5%
- 3) proportion of women who are sexually inexperienced at entry of 23%
- 4) Proportion of virginal women who initiate sexual activity during follow-up of 43% (constant rate of initiation assumed during the 4-year follow-up period)
- 5) proportion of sexually experienced women who are both HPV-16 and HPV-18 DNA positive at entry of 0.6%
- 6) proportion of sexually experienced women who acquire HPV-16/18 during the vaccination phase of 1.5% (includes women who develop incident CIN2+ associated with HPV-16/18 infection during this period)
- 7) proportion of women who receive 1+ vaccine doses outside the prescribed protocol window of 20%
- 8) proportion of women who drop out during the study period of 10% (constant drop-out rate assumed during the 4-year follow-up period)
- 9) a two-sided alpha of 0.05. (Amended: 13 Nov 2008)

## 5. OVERSIGHT BY THE DATA AND SAFETY MONITORING BOARD & ADVISORY BOARD

A Data and Safety Monitoring Board (DSMB) has been established by NCI to review and monitor the trial. The Charter Document for this DSMB is provided separately from this protocol. The DSMB membership consists of individuals with expertise in statistics, gynecology, pathology, clinical trials, and health advocacy. A list of the DSMB members is provided separately from this protocol in the DSMB Charter. Members of the DSMB are from outside the NIH to assure an independent review of the trial. DSMB members have no conflicts of interest with pharmaceutical companies currently involved in the development of prophylactic HPV vaccines. The DSMB is composed of both United States and Costa Rican nationals to assure joint review of the trial by representatives of both countries involved.

The primary role of the DSMB will be to:

- Monitor accrual and event rates to confirm that assumptions underlying the trial design are adequate.
- Monitor adverse event data at yearly intervals, or more frequently if needed, to assure the safety of participants.
- Monitor efficacy, should the need for an interim analysis arise, considering the guidelines which are provided separately from this protocol as part of the Charter Document for the DSMB. It should be noted that no interim analysis is planned at present.

After each meeting the DSMB will submit its recommendations to the NCI Principal Investigator, the DCEG Scientific Director, the Costa Rican Principal Investigator, and the NCI and Costa Rican IRBs. The NCI Principal Investigators will share these recommendations with GSK Biologicals.

In addition to the DSMB, the NCI has formed an External Advisory Group comprised of experts in virology, vaccinology, gynecology, oncology, pathology, epidemiology, statistics, medical ethics, and health advocacy. This group will advise the NCI Principal Investigator and the DCEG Scientific Director on other issues that will undoubtedly arise during the course of the trial. For example, the External Advisory Group may be asked to:

- Review and approve the trial protocol and procedures prior to initiation of the trial.
- Review concepts for ancillary studies to assure that their implementation will not negatively impact the primary or secondary objectives of our trial.
- Review major publications relating to the primary or secondary objectives of our trial.

Members of the External Advisory Group are from outside the NIH to assure independence. Members have no conflicts of interest with pharmaceutical companies currently involved in the development of prophylactic HPV vaccines. The External



Advisory Group is composed of both United States and Costa Rican nationals to assure joint review of the trial by representatives of both countries involved.

## **6. HUMAN SUBJECTS PROTECTION**

The HPV16/18 VLP Vaccine Trial will be conducted in compliance with regulations for human subject research in effect in Costa Rica and the United States (The Belmont Report & Title 45 Code of Federal Regulations, Part 46, Protection of Human Subjects, and Declaration of Helsinki 1996, including its 2000 amendment). (Amended: 29 Mar 2005)]. The principles of respect for persons, beneficence, and justice will be paramount in planning our trial. Participants will be recruited into our trial only after they have been informed about the trial procedures, have understood what is being asked of them, and signed an informed consent form. A draft of the Informed Consent form is provided separately from this protocol. The subject information sheet and written informed consent form as well as the informed consent process employed during our trial will comply with Section 4.8 (Informed Consent of Trial Subjects) of the ICH guideline for Good Clinical Practices. Our trial will be limited to women, since the goal of the trial is to investigate vaccine efficacy against a disease that occurs among women only. Women 18-25 years of age at enrollment will be eligible to participate. The lower age limit of 18 was chosen since this is the age at which individuals in Costa Rica are considered adults and the age at which they can legally self-consent to participation in research projects. Since the US National Institutes of Health (NIH) defines women younger than 21 as children, our trial will include “children” (women ages 18-20 years) based on the US NIH definition.

Trial plans and procedures will be reviewed by the NCI Institutional Review Board (IRB). A local IRB in Costa Rica will also review this project. The Costa Rican IRB responsible for review of our project is part of INCIENSA (Costa Rican Institute for Research on Nutrition and Health), an institution affiliated with the Ministry of Health. This local IRB is registered with the Costa Rican CONIS (Scientific Research National Council of the Ministry of Health). It is also registered with the US Office of Human Research Protection (IRB# 00001092) and our study will be conducted under a Federal-Wide Assurance (FWA# 00006588) from the Department of Health and Human Services (DHHS).

The trial will also be conducted under Title 21 Part 312 governing the conduct of trials under an Investigational New Drug Application (IND) and Good Clinical Practices (ICH E6).

The trial will be conducted in a manner that maximizes patient confidentiality. A trial-specific patient identification number will be assigned to each participant to avoid use of name or other patient identifiers (e.g., national ID number). Separate specimen identification numbers will also be used (distinct from the patient identification numbers) to provide an additional level of privacy protection. Interviews and clinical examinations will be conducted in a private setting by study staff that have been carefully trained and are aware of the need to maintain patient confidentiality. Data collected as part of this trial will be coded and keyed into a secure data management system developed specifically for this trial. Information that is sent in an expedited manner to NCI and GSK (e.g., SAE reports) will contain only the study-specific identification number and will not

**CONFIDENTIAL**

NCI Protocol # 04-C-N191; GSK Protocol # 580299/009 (HPV-009)

Amendment 5

contain names or other patient identifiers (e.g., national ID number). Analysis datasets generated for this trial will not contain patient names, and will instead rely on the trial-specific patient and specimen identification numbers.

Since our trial will involve a medical intervention on a large number of women, an independent DSMB has been established to monitor adverse events and trial progress (see Section 5). The DSMB will perform periodic review of adverse events reported during the trial. After each review, members of the DSMB will summarize their findings and will report them to the NCI Principal Investigator and to the NCI and local Costa Rican IRBs. Should the NCI or local IRB have any concerns regarding trial adverse events, these will be addressed directly to the DSMB with a copy to the Costa Rica and NCI Principal Investigator. Full communication between the human subjects review committees and the DSMB is essential and will be the responsibility of the NCI Principal Investigator.

## 7. VACCINE MANUFACTURING & QUALITY CONTROL

The vaccines to be used in our trial will be manufactured by GSK Biologicals and provided to the NCI under a Clinical Trials Agreement (CTA). The HPV16/18 L1 VLP and control (HAV) vaccines will be manufactured under strict GMP conditions. Three lots of HPV16/18 VLP vaccine have been prepared to support the Phase III efficacy trial. Each HPV16/18 VLP vaccine lot is manufactured using one single batch of HPV16 L1 VLP antigen and one single batch of HPV18 L1 VLP antigen. Four lots of the investigational formulation of *Havrix* control vaccine have been prepared to support the Phase III efficacy trial. Formulation of the *Havrix* control vaccine lots was performed using one batch of purified inactivated Hepatitis A antigen. Individual use syringes will be prepared and pre-labeled with individual specimen ID numbers. Exhaustive quality control procedures are implemented during the manufacturing, syringe filling, and labeling process, and include an assessment of product purity, identity, strength/potency, and safety. Details regarding vaccine manufacturing and quality control procedures can be found in the GSK Investigator Brochure.

Each lot of vaccine prepared for the Costa Rica trial will undergo extensive stability studies in which both the bulk and final product packaged in syringes will be tested to assure continued purity, stability, and strength/potency of the vaccine. Such testing will be performed at predefined intervals and at temperatures ranging from 37°C to 4°C.

Studies to date indicate that the vaccine is stable for two years when stored at 2°C to 8°C. Moreover, experience during Phase II demonstrated that vaccine handled in the field at more than 50 different study centers in the USA, Canada, and Brazil was highly immunogenic; overall, more than 98% of women receiving 3 doses of HPV16/18 VLP vaccine developed antibodies to HPV16 and HPV18, compared to less than 5% of women receiving 3 doses of control vaccine. Nonetheless, results from stability studies performed at GSK Biologicals on the lots of vaccine manufactured for the Costa Rica trial will be reviewed by the NCI and Costa Rica Principal Investigators on an ongoing basis. Should evidence of >50% VLP disassociation or loss in potency be observed, a new lot of vaccine will be manufactured by GSK Biologicals to replace the original lot in Costa Rica.

## 8. COLLABORATORS AND CONSULTANTS

A list of collaborators and consultants, the medical and scientific contributions that they will provide to the NCI HPV16/18 VLP Vaccine Trial in Costa Rica, and their institutional affiliations is provided separately from this protocol.

The main collaborating institutions involved in this trial and their role in the trial are summarized below.

**U.S. National Cancer Institute (NCI):** The NCI, in close collaboration with its Costa Rican collaborators, is responsible for the overall design and implementation of the trial. NCI will also be responsible, in collaboration with its Costa Rican collaborators, for the analysis of data obtained from this trial. The trial is funded by the NCI.

**Proyecto Epidemiologico Guanacaste (PEG):** PEG investigators, in close collaboration with its NCI collaborators, are responsible for the overall design of the trial and for conducting the field activities required for its implementation. PEG investigators are also responsible, along with its NCI collaborators, for the analysis of data obtained from this trial.

**GlaxoSmithKline Biologicals (GSK):** Under a Clinical Trials Agreement with the NCI, GSK has agreed to provide the vaccines to be used for the trial. The trial will be conducted under a GSK IND with the US FDA and as such GSK will be responsible for reporting to the US FDA. Data generated by this trial will be used by GSK for submission to regulatory authorities in the United States and elsewhere.

**Costa Rica Ministry of Health (MOH):** Under a Letter of Intent with the NCI, the MOH has expressed its interest in the trial and its intent to support its implementation.

**Costa Rican Institute for Research and Training in Nutrition and Health (INCIENSA):** The INCIENSA IRB will be responsible for Human Subjects Review of the trial in Costa Rica.

**Westat, Inc.:** Under contract with the NCI, Westat will assist NCI and Costa Rican investigators in the development of trial materials and manuals. Westat will also be responsible for monitoring and auditing trial activities, and for tracking the reporting of SAEs and pregnancy information to the NCI and GSK.

**Information Management Services (IMS):** Under contract with the NCI, IMS is responsible for the development and maintenance of the data management system used for our trial. IMS will also assist NCI in the preparation of reports for the DSMB and other review entities, in running of edit reports on data received from Costa Rica, and in data analysis.

**Boston Biomedica Inc.-Biotech Research Laboratories (BBI):** Under contract with the NCI, BBI will serve as the primary repository for specimens collected from this trial. BBI will also provide assistance to the NCI and Costa Rican investigators in the set-up and maintenance of the local repository in Costa Rica.

**CONFIDENTIAL**

NCI Protocol # 04-C-N191; GSK Protocol # 580299/009 (HPV-009)  
Amendment 5

**9. PROJECTED TIMETABLE**

|                                                                      |                     |
|----------------------------------------------------------------------|---------------------|
| Review of Protocol by External Advisory Group                        | Mar '03             |
| Submission of Concept Protocol to the FDA                            | June '03            |
| NCI Human Subjects Annual Review                                     | Jul '03             |
| Costa Rican Human Subjects Annual Review                             | Aug '03             |
| Submission of CMC & Full Study Protocol to FDA                       | Jan '04             |
| First Batch of Vaccine Doses for Study Delivered to Costa Rica       | Apr '04             |
| Training                                                             | May '04             |
| Initiation of Main Trial (Amended: 29 Mar 2005)                      | June 28, '04        |
| Enrollment of Participants (Amended: 29 Mar 2005; 31 Oct 2005)       | June '04 – Dec'05   |
| Vaccination of Participants (Amended: 31 Oct 2005)                   | June '04 – June '06 |
| Active Follow-up of Participants (Amended: 29 Mar 2005; 31 Oct 2005) | June '04 – Dec '09  |
| Study Close-out (Amended: 29 Mar 2005; 31 Oct 2005)                  | Nov '09 – Apr '10   |

## 10. REFERENCES

- Bosch, F. X., Manos, M. M., Munoz, N., Sherman, M., Jansen, A. M., Peto, J., Schiffman, M. H., Moreno, V., Kurman R., Shah, K. V., and the International biological study on cervical cancer (IBSCC) study group. Prevalence of human papillomavirus in cervical cancer: a worldwide perspective. *J Natl Cancer Inst*, 87: 796-802, 1995.
- Breitbart, F., Kirnbauer, R., Hubbert, N. L., Nonnenmacher, B., Trin-Dinh-Desmarquet, C., Orth, G., Schiller, J. T., and Lowy, D. R. Immunization with viruslike particles from cottontail rabbit papillomavirus (CRPV) can protect against experimental CRPV infection. *J Virol*, 69: 3959-3963, 1995.
- Christensen, N. D., Reed, C. A., Cladel, N. M., Han, R., and Kreider, J. W. Immunization with viruslike particles induces long-term protection of rabbits against challenge with cottontail rabbit papillomavirus. *J Virol*, 70: 960-965, 1996.
- Evans, T. G., Bonnez, W., Rose, R. C., Koenig, S., Demeter, L., Suzich, J. A., O'Brien, D., Campbell, M., White, W. I., Balsley, J., and Reichman, R. C. A Phase 1 study of a recombinant viruslike particle vaccine against human papillomavirus type 11 in healthy adult volunteers. *J Infect Dis*, 183: 1485-1493, 2001.
- Gravitt, P. E., Lacey J. V. Jr., Brinton, L. A., Barnes W. A., Kornegay, J. R., Greenberg, M. D., Greene, S. M., Hadjimichael, O. C., McGowan, L., Mortel, R., Schwartz, P. E., Zaino, R., and Hildesheim, A. Evaluation of self-collected cervicovaginal cell samples for human papillomavirus testing by polymerase chain reaction. *Cancer Epidemiol Biomarkers Prev*, 10: 95-100, 2001.
- Harro, C. D., Pang, Y. Y., Roden, R. B., Hildesheim, A., Wang, Z., Reynolds M. J., Mast T. C., Robinson, R., Murphy, B. R., Karron, R. A., Dillner, J., Schiller, J. T., and Lowy, D. R. Safety and immunogenicity trial in adult volunteers of a human papillomavirus type 16 L 1 virus-like particle vaccine. *J Natl Cancer Inst*, 93: 284-292, 2001.
- Herrero, R., Brinton, L. A., Hartge, P., Reeves, W. C., Brenes, M. M., Urcuyo, R., Pacheo, M., Fuster, F., and Sierra, R. Determinants of the geographic variation of invasive cervical cancer in Costa Rica. *Bull Pan Am Health Organ*, 27: 15-25, 1993.
- Herrero, R., Hildesheim, A., Bratti, C., Sherman, M. E., Hutchinson, M., Morales, J., Balmaceda, I., Greenberg, M. D., Alfaro, M., Burk, R. D., Wacholder, S., Plummer M., and Schiffman, M. Population-based study of human papillomavirus infection and cervical neoplasia in rural Costa Rica. *J Natl Cancer Inst*, 92: 464-474, 2000.
- Herrero, R., Schiffman, M. H., Bratti, C., Hildesheim, A., Balmaceda, I., Sherman, M. E., Greenberg, M., Cardenas, F., Gomez, V., Helgesen, K., Morales, J., Hutchinson, M., Mango, L., Alfaro, M., Potischman, N. W., Wacholder, S., Swanson, C., and Brinton, L. A. Design and methods of a population-based natural history study of cervical neoplasia in a rural province of Costa Rica: the Guanacaste project. *Pan Am J Public Health*, 1: 362-375, 1997.

**CONFIDENTIAL**

NCI Protocol # 04-C-N191; GSK Protocol # 580299/009 (HPV-009)

Amendment 5

Hildesheim, A., Schiffman, M. H., Gravitt, P. E., Glass, A. G., Greer, C. E., Zhang, T., Scott, D. R., Rush, B. B., Lawler, P., Sherman, M. E., Kurman, R. J., and Manos, M. M. Persistence of type-specific human papillomavirus infection among cytologically normal women. *J Infect Dis*, *169*: 235-240, 1994.

Ho, G. Y. F., Burk, R. D., Klein, S., Kadish, A. S., Chang, C. J., Palan, P., Basu, J., Tachezy, R., Lewis, R., and Romney, S. Persistent genital human papillomavirus infection as a risk factor for persistent cervical dysplasia. *J Natl Cancer Inst*, *87*: 1365-1371, 1995.

IARC Working Group on the Evaluation of Carcinogenic Risks to Humans. Human Papilloma Viruses, vol. 64. Lyon, France: IARC, 1995.

Kirnbauer, R., Chandrachud, L. M., O'Neil, B. W., Wagner, E. R., Grindlay, G. J., Armstrong, A., McGarvie, G. M., Schiller, J. T., Lowy, D. R., and Campo, M. S. Virus-like particles of bovine papillomavirus type 4 in prophylactic and therapeutic immunization. *Virology*, *219*: 37-44, 1996.

Kirnbauer, R., Hubbert, N. L., Wheeler, C. M., Becker, T. M., Lowy, D. R., and Schiller, J. T. A virus-like particle enzyme-linked immunosorbent assay detects serum antibodies in a majority of women infected with human papillomavirus type 16. *J Natl Cancer Inst*, *86*: 494-499, 1994.

Koutsky, L. A., Ault, K. A., Wheeler, C. M., Brown, D. R., Barr, E., Alvarez, F. B., Chiacchierini, L. M., and Jansen, K. U. A controlled trial of a human papillomavirus type 16 vaccine. *N Engl J Med*, *347*: 1645-1651, 2002.

Koutsky, L. A., Holmes, K. K., Critchlow, C. W., Stevens, C. E., Paavonen, J., Beckmann, A. M., DeRouen, T. A., Galloway, D. A., Vernon, D., and Kiviat, N. B. A cohort study of the risk of cervical intraepithelial neoplasia grade 2 or 3 in relation to papillomavirus infection. *N Engl J Med*, *327*(18): 1272-1278, 1992.

Kurman, R. J., Henson, D. E., Herbst, A. L., Noller, K. L., and Schiffman, M. H. Interim guidelines for management of abnormal cervical cytology. *JAMA*, *271*: 1866-1869, 1994.

Liaw, K. L., Hildesheim, A., Burk, R. D., Gravitt, P., Wacholder, S., Manos, M. M., Scott, D. R., Sherman, M. E., Kurman, R. J., Glass, A. G., Anderson, S. M., and Schiffman, M. A prospective study of human papillomavirus (HPV) type 16 DNA detection by polymerase chain reaction and its association with acquisition and persistence of other HPV types. *J Infect Dis*, *183*: 8-15, 2001.

Lowe, R. S., Brown, D. R., Bryan, J. T., Cook, J. C., George, H. A., Hofmann, K. J., Hurni, W. M., Joyce J. G., Lehman, E. D., Markus, H. Z., Neeper, M. P., Schultz, L. D., Shaw, A. R., and Jansen, K. U. Human papillomavirus type 11 (HPV-11) neutralizing antibodies in the serum and genital mucosal secretions of African green monkeys immunized with HPV-11 virus-like particles expressed in yeast. *J Infect Dis*, *176*: 1141-1145, 1997.

**CONFIDENTIAL**

NCI Protocol # 04-C-N191; GSK Protocol # 580299/009 (HPV-009)

Amendment 5

Munoz, N., Bosch, F. X., De Sanjose, S., Herrero, R., Castellsague, X., Shah, K. V., Snijders, P. J., Meijer, C. J.; International Agency for Research on Cancer Multicenter Cervical Cancer Study Group. Epidemiologic classification of human papillomavirus types associated with cervical cancer. *N Engl J Med*, 348: 518-527, 2003.

Nardelli-Haeffliger, D., Wirthner D, Schiller JT, Lowy, DR., Hildesheim, A., Ponci F, and De Grandi, P. Specific antibody levels at the cervix during the menstrual cycle of women vaccinated with human papillomavirus type 16 virus-like particles. *J Natl Cancer Inst*, 95: 1128-1137, 2003.

Nobbenhuis, M. A. E., Walboomers, J. M. M., Helmerhorst, T. J. M., Rozendaal, L., Remmink, A. J., Risse, E. K. J., van der Linden, H. C., Voorhorst, F. J., Kenemans, P., and Meijer, C. J. L. Relation of human papillomavirus status to cervical lesions and consequences for cervical-cancer screening: a prospective study. *The Lancet*, 354: 20-25, 1999.

Parkin, D. M., Pisani, P., and Ferlay, J. Global cancer statistics. *CA- Ca J Clin*, 49: 33-64, 1999.

Reeves, W. C., Brinton, L. A., Garcia, M., Brenes, M. M., Herrero, R., Gaitan, E., Tenorio, F., De Britton, R. C., and Rawls, W. E. Human papillomavirus infection and cervical cancer in Latin America. *N Engl J Med*, 320: 1437-1441, 1989.

Schiffman, M. H., Bauer, H. M., Hoover, R. N., Glass, A. G., Cadell, D. M., Rush, B. B., Scott, D. R., Sherman, M. E., Kurman, R. J., Wacholder, S., Stanton, C. K., and Manos, M. M. Epidemiologic evidence showing that human papillomavirus infection causes most cervical intraepithelial neoplasia. *J Natl Cancer Inst*, 85: 958-964, 1993.

Schiffman, M. H., Liaw, K. L., Herrero, R., Sherman, M. E., and Hildesheim, A. Epidemiologic Support for a Simplified View of Cervical Carcinogenesis. *Genital Infections and Neoplasia*, 1: 2-6, 1998.

Schiffman, M., Herrero, R., Hildesheim, A., Sherman, M. E., Bratti, M. C., Wacholder, S., Alfaro, M., Hutchinson, M., Morales, J., Greenberg, M. D., and Lorincz, A. T. HPV DNA testing in cervical cancer screening: results from women in a high-risk province of Costa Rica. *JAMA*, 283: 87-93, 1999.

Solomon, D., Davey, D., Kurman, R., Moriarty, A., O'Connor, D., Prey, M., Raab, S., Sherman, M., Wilbur, D., Wright, Jr., T., Young, N., for the Forum Group Members and the Bethesda 2001 Workshop. The 2001 Bethesda System – Terminology for reporting results of cervical cytology. *JAMA*, 287: 2114-2119, 2002.

Solomon, D., Schiffman, M., Tarone, R.; ALTS Study Group. Comparison of three management strategies for patients with atypical squamous cells of undetermined significance: baseline results from a randomized trial. *J Natl Cancer Inst*, 21: 293-299, 2001.

Suzich, J. A., Ghim, S. J., Palmer-Hill, F. J., White, W. I., Tamura, J. K., Bell, J. A., Newsome, J. A., Jenson, A. B., and Schlegel, R. Systemic immunization with



**CONFIDENTIAL**

NCI Protocol # 04-C-N191; GSK Protocol # 580299/009 (HPV-009)  
Amendment 5

papillomavirus L1 protein completely prevents the development of viral mucosal papillomas. *Proc Natl Acad Sci*, 92: 11553-11557, 1995.

Taylor M. L., Garcia Z., Holst I., Somogye T., Cunningham L., and Visona K. A. Seroprevalencia de los virus de la hepatitis A y B en grupos etarios de Costa Rica. *Acta medica costarricense*, 43: 153-158, 2001.

The Atypical Squamous Cells of Undetermined Significance/Low-Grade Squamous Intraepithelial Lesions Triage Study (ALTS) Group. Human papillomavirus testing for triage of women with cytologic evidence of low-grade squamous intraepithelial lesions: baseline data from a randomized trial. *J Natl Cancer Inst*, 92: 397-402, 2000.

Woodman, C. B., Collins, S., Winter, H., Bailey, A., Ellis, J., Prior, P., Yates, M., Rollason, T. P., Young, L. S. Natural history of cervical human papillomavirus infection in young women: a longitudinal cohort study. *Lancet*, 357: 1831-1836, 2001.

## **11. APPENDICES**

Appendix A CLINICAL MANAGEMENT ALGORITHMS

Colposcopy Referral Algorithm

Referral Algorithm

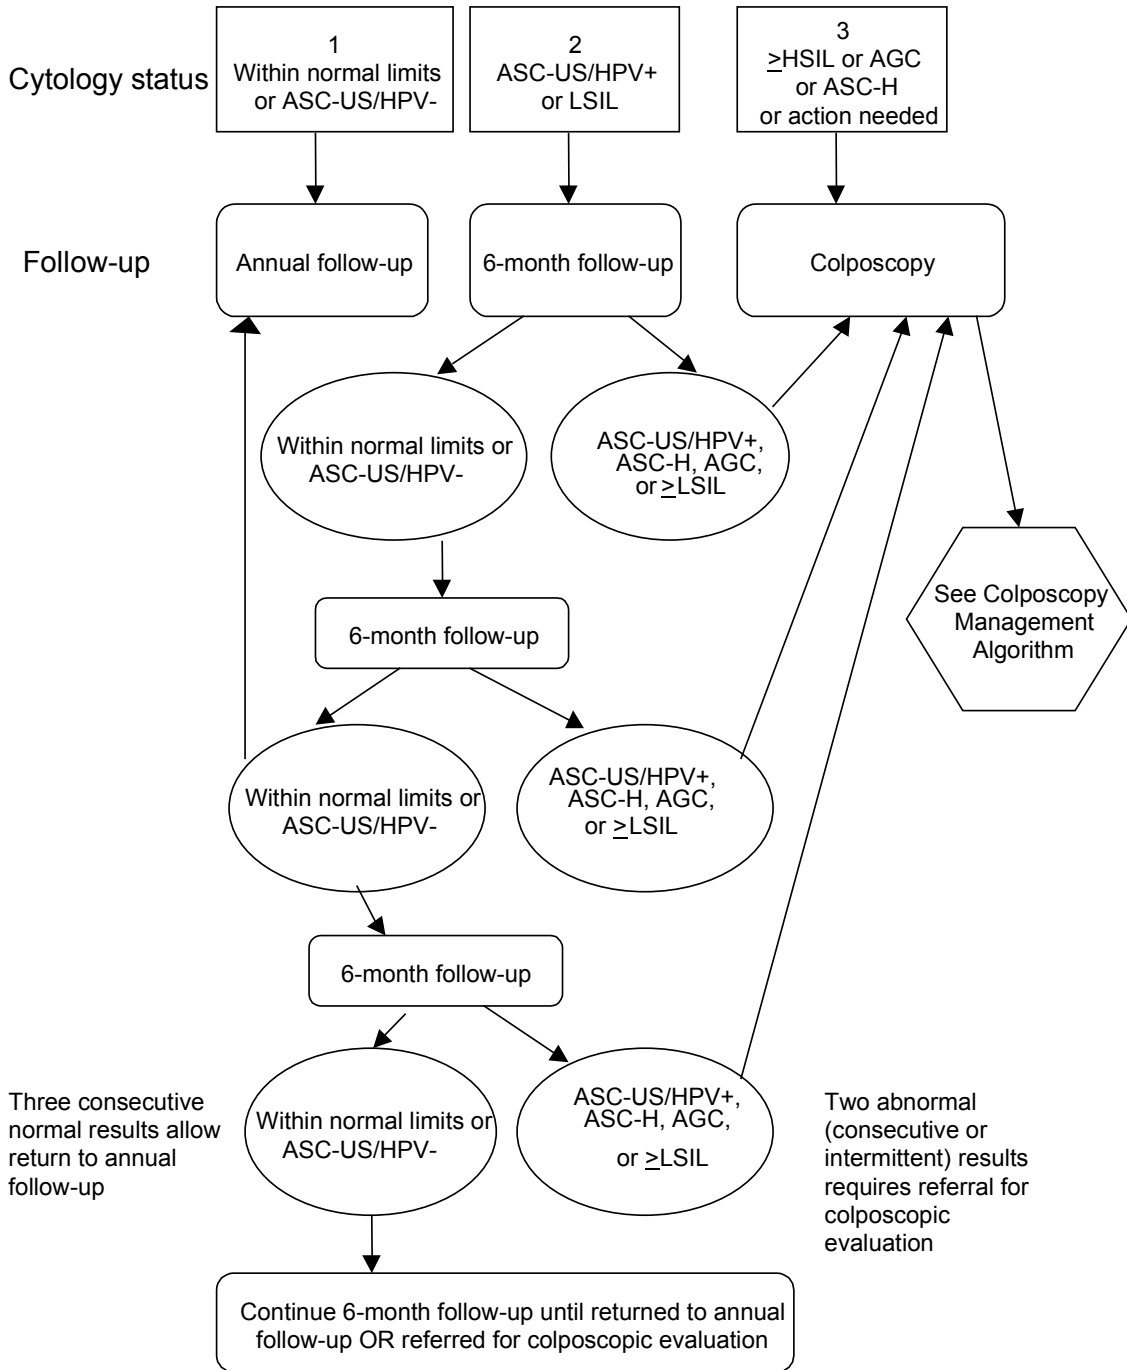

**Colposcopy Management Algorithm**

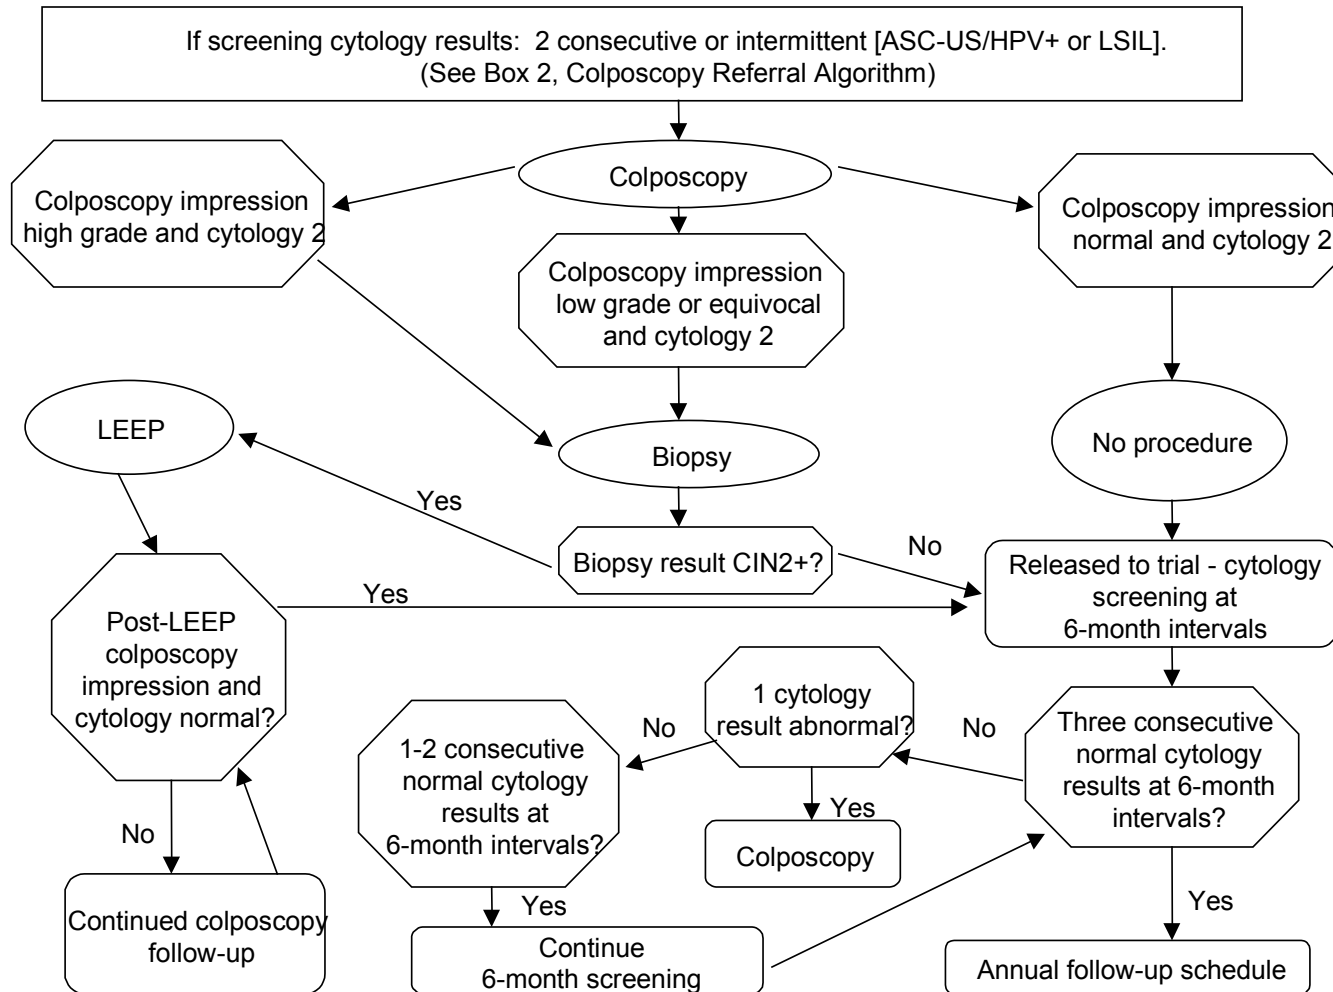

### Colposcopy Management Algorithm

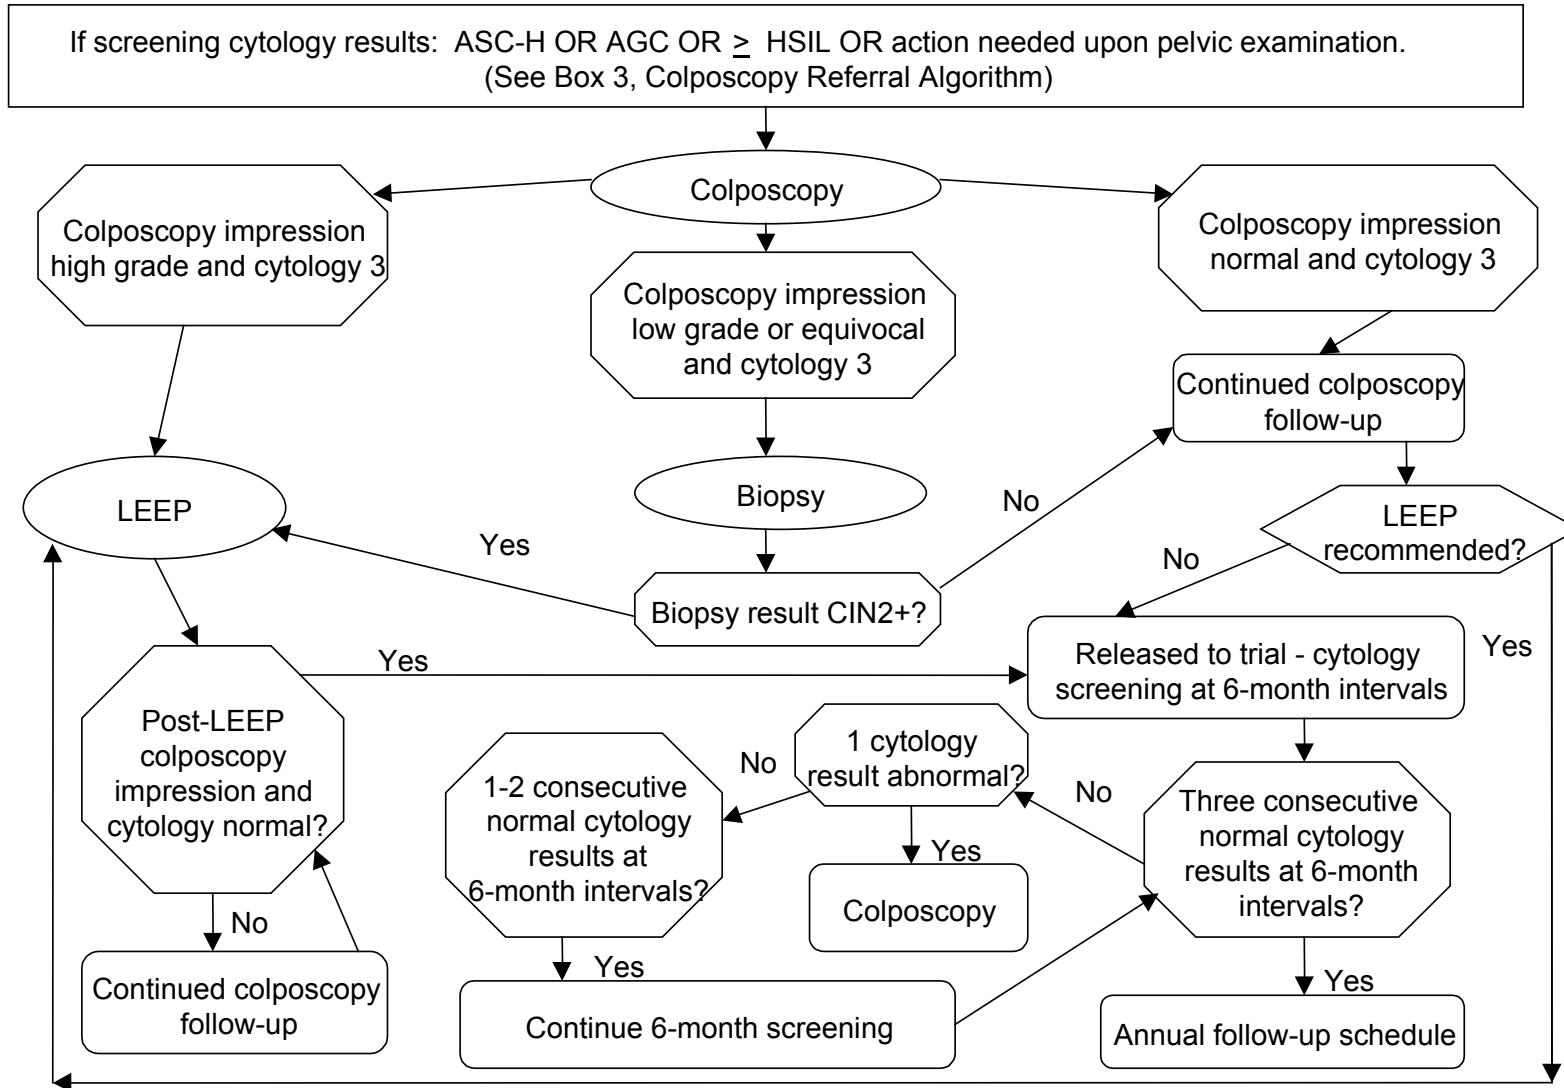

**CONFIDENTIAL**

NCI Protocol # 04-C-N191; GSK Protocol # 580299/009 (HPV-009)

Amendment 5

**Colposcopic Treatment Table**

| Referral Reason                                     | Colposcopic Impression |                        |                |                         |
|-----------------------------------------------------|------------------------|------------------------|----------------|-------------------------|
|                                                     | High-Grade             | Low-Grade or equivocal | Negative       | Unsatisfactory*         |
| ASC-H, or AGC, or HSIL+ or action needed            | LEEP                   | Biopsy                 | Colpo 6 months | Colpo within 6 months** |
| 2 consecutive or intermittent [ASC-US/HPV+ or LSIL] | Biopsy                 | Biopsy                 | Colpo 6 months | Colpo within 6 months   |

\*Unsatisfactory means no lesion was seen in ectocervix but a portion of the endocervical canal was not visible. If unsatisfactory for other reasons, reschedule colposcopy visit.

\*\*If the reason for the unsatisfactory colposcopy can be modified (e.g., heavy discharge, etc) the woman will be appointed for a new colposcopy as soon as possible. If the reason can not be modified (TZ inside the canal with narrow cervical os) the participant will be given a new appointment to colposcopy (including cytology with a Cytobrush) within 2 months. If the high-grade lesion is confirmed LEEP will be performed. If the second test is negative, a third colposcopy will be done six months later.

Amended: 13 Nov 2008

**Colposcopy Referral Algorithm- Month 48 Visit**

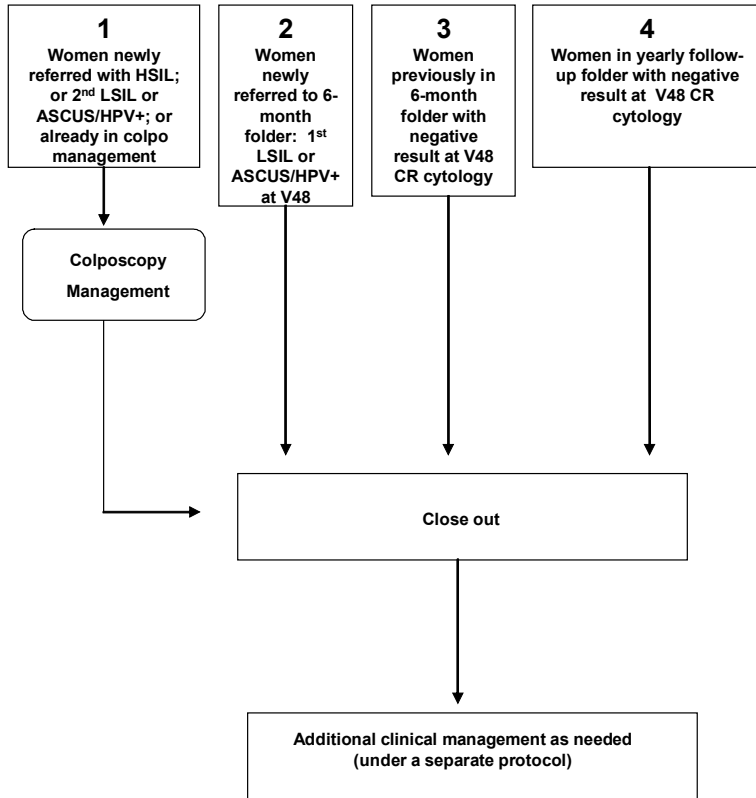

## Appendix B RANDOMIZATION PROCEDURES

### Approach to Labeling and Distribution of Randomized Vaccine and Control Syringes

Women identified in the enumeration survey ages 18 to 25 at the time of enrollment will be invited to participate in the trial. Enrollment will occur at study clinics in the Guanacaste province. Subjects will **not** be randomly assigned to a particular arm (i.e., material type) prior to study start. Instead, randomization to one of the two trial arms will occur when the subject receives her first vaccination. The procedure for vaccine labeling and distribution is described below.

Vaccine and control syringes will be appropriately labeled using a randomized number list associated with the vaccine and the control syringes. Vaccine identification numbers will be randomized to HPV16/18 VLP and control vaccine syringes by NCI using a standard SAS (Statistical Analysis System) program. The vaccine identification numbers will uniquely identify the vaccine doses to be administered to the same subject. The randomization listing will be used by the NCI to generate vaccine labels. Labels containing the randomized numbers will be provided to GSK Biologicals in Rixensart, where they will be applied to the respective syringes. Labeled HPV16/18 VLP vaccine and control syringes will be combined, sorted in numerical order, and delivered in sequentially numbered boxes to the study site in Costa Rica. Syringes will be pulled in numeric order for vaccination in the study clinics from these boxes.

In preparation for vaccine distribution to the clinics at the enrollment visit, first dose vaccine syringes will be pulled in numeric order and placed in boxes for transport to each clinic according to the number of subjects appointed to each clinic. The vaccine syringes to be used in administration at enrollment are already labeled with a label containing the sample vaccine Identification number (vaccine ID) and the sequence number representing the dose (e.g., VX 21234-001) of the vaccine being administered. As an example, for an enrollment visit at Clinic 1 where 25 subjects have been invited, vaccines starting with a vaccine ID of VX12345-001 and continuing through VX12369-001 will be placed in a transport box in a serpentine fashion by ascending number. Boxes filled with syringes for Clinic 2 will be filled with syringes VX12370-001 to VX12394-001 for 25 potential subjects, and so on. As a subject is determined to be eligible, the next available syringe with the lowest value vaccine ID number will be pulled for application. In this manner, as subjects randomly enter the study, the integrity of randomization carried out during the numbering and labeling process is maintained and study site personnel and subjects are blinded to material type.

However, it should be noted that while this **pattern** of placing syringes by ascending numeric order will be followed for distribution of vaccine and control syringes, the syringes may not be sequentially ordered after the first day of the trial. This is due to the fact that not all invited subjects will become eligible to participate in the trial, and some first dose syringes in each batch distributed to a clinic may be left unused. Unused syringes will be returned to inventory on a daily basis. Upon assignment of subjects to the next day's clinics, the next available first dose syringe with the lowest vaccine ID will be used until a sufficient number of syringes are packed for distribution at each clinic. Due to this process, the vaccine IDs in each batch of syringes sent to a clinic could have some



**CONFIDENTIAL**

NCI Protocol # 04-C-N191; GSK Protocol # 580299/009 (HPV-009)

Amendment 5

numeric gaps between syringe identification numbers. However, the pattern of placing the lowest vaccine ID followed by ascending vaccine IDs will continue, thereby ensuring the assignment of a syringe in an ordered fashion, thus preserving randomization.

As the trial progresses, the second and third doses of vaccine and control syringes will be needed. The syringes for the second and third doses will be selected based on linkage of the vaccine ID to the first dose so as to maintain the same material type for each participant. A subject who received a vaccination from a syringe with a vaccine ID label of VX12345-001, would receive her second and third doses from syringes with a vaccine ID of VX12345-002 and VX12345-003, respectively. The second and third doses of the vaccine and control syringes will also be distributed in each clinic in ascending numeric order. This method of placement in transport boxes and use in the field allows easy accessibility for study personnel. Moreover, this procedure provides for the initial randomization of material type to a subject and the assurance that the second and third dose for each subject is the same material type as the first dose received.

In the event that an assigned syringe (i.e., a dose 2 or dose 3 syringe) is determined to be unusable, additional doses will be available on site to be used as replacements. In case an assigned syringe dose is broken or unusable, the investigator will replace it with a replacement syringe, using a web-based system developed by trial Data Management Center (DMC), under contract with the NCI. This system will ensure a fast, secure, and masked process for assigning replacement syringes. Only authorized personnel with valid logon and password information will be allowed to access the web-based replacement system; no treatment information will be accessible via this system. The replacement process will be documented on the vaccine administration page of the CRF and on the web-based replacement application.

**Appendix C HPV PCR TESTING ALGORITHM FOR HPV16 & HPV18 DETERMINATION**

**Proposed Phase III Algorithm**

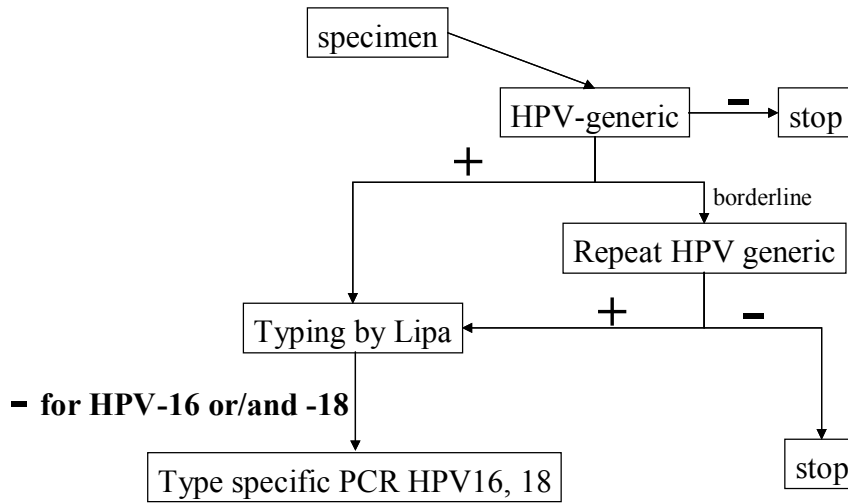

**Appendix D CRITERIA FOR DEFINING ADVERSE EVENTS (AEs), SERIOUS AEs (SAEs), AND PROCEDURES FOR AND TIMING OF AE REPORTING**

**Adverse Events and Serious Adverse Events**

The investigator is responsible for the detection and documentation of events meeting the criteria and definition of an adverse event (AE) or serious adverse event (SAE) as provided in this Appendix. During the study, when there is a safety evaluation, the investigator will be responsible for detecting AEs and SAEs, as detailed in this Appendix.

Each subject will be instructed to contact the investigator immediately should she manifest any signs or symptoms indicated below.

1. Definition of an adverse event

An AE is any untoward medical occurrence in a clinical investigation subject, temporally associated with the use of a medicinal product, whether or not considered related to the medicinal product.

An AE can therefore be any unfavorable and unintended sign (including an abnormal laboratory finding), symptom, or disease (new or exacerbated) temporally associated with the use of a medicinal product.

Examples of an AE include:

- Exacerbation of a chronic or intermittent pre-existing condition including either an increase in frequency and/or intensity of the condition.
- New conditions detected or diagnosed after investigational product administration even though it may have been present prior to the start of the study.
- Signs, symptoms, or the clinical sequelae of a suspected interaction.
- Signs, symptoms temporally associated with vaccine administration.

Examples of an AE DO NOT include:

- Medical or surgical procedure (e.g., endoscopy, appendectomy); however, the condition that leads to the procedure is an AE.
- Situations where an untoward medical occurrence did not occur (social and/or convenience admission to a hospital).
- Anticipated day-to-day fluctuations of pre-existing disease(s) or condition(s) present or detected at the start of the study that do not worsen.

AEs may include pre- or post-treatment events that occur as a result of protocol-mandated procedures (i.e., invasive procedures, modification of subject's previous therapeutic regimen).

**CONFIDENTIAL**

NCI Protocol # 04-C-N191; GSK Protocol # 580299/009 (HPV-009)  
Amendment 5

NOTE: Pre-existing conditions or signs and/or symptoms present in a subject prior to the start of the study (i.e., prior to the first study procedure) should be recorded in the Enrollment General Physical Exam and Medical History form CE\_MH.

2. Definition of a serious adverse event

A serious adverse event (SAE) is any untoward medical occurrence that:

- a. Results in death,
- b. Is life-threatening

NOTE: The term 'life-threatening' in the definition of 'serious' refers to an event in which, in the opinion of the investigator, the subject is at risk of death at the time of the event as it occurred; i.e., it does not include an event that, had it occurred in a more severe form, may have caused death (21 CFR 312.32).

- c. Requires hospitalization or prolongation of existing hospitalization

NOTE: In general, hospitalization signifies that the subject has been detained (usually involving at least an overnight stay) at the hospital or emergency ward for observation and/or treatment that would not have been appropriate in the physician's office or outpatient setting. Complications that occur during hospitalization are AEs. If a complication prolongs hospitalization or fulfils any other serious criteria, the event is serious. When in doubt as to whether "hospitalization" occurred or was necessary, the AE should be considered serious.

Hospitalization for elective surgery related to a pre-existing condition that did not worsen from baseline is not considered an AE.

- d. Results in persistent or significant disability/incapacity,
- e. Is a congenital anomaly/birth defect in the offspring of a study subject,

NOTE: Medical or scientific judgement should be exercised in deciding whether reporting is appropriate in other situations, such as important medical events that may not be immediately life-threatening or result in death or hospitalization but may jeopardize the subject or may require medical or surgical intervention to prevent one of the other outcomes listed in the above definition. These should be considered serious. Examples of such events are invasive or malignant cancers, intensive treatments in an emergency room or at home for allergic bronchospasm, blood dyscrasia, or convulsion but do not result in hospitalization.

3. Lack of efficacy

"Lack of efficacy" *per se* will not be reported as an AE. The signs and symptoms or clinical sequelae resulting from lack of efficacy will be reported if they fulfil the AE or SAE definition.

4. Clinical laboratory parameters and other abnormal assessments qualifying as adverse events and serious adverse events

Abnormal laboratory findings (e.g., clinical chemistry, cytology) or other abnormal assessments (e.g., vital signs) that are judged by the investigator to be clinically significant will be reported as AEs or SAEs if they meet the definition of an AE, as defined in Section 1, or SAE, as defined in Section 2. Clinically significant abnormal laboratory findings or other abnormal assessments that are detected during the study or are present at baseline and significantly worsen following the start of the study will be reported as AEs or SAEs. The investigator will exercise his or her medical and scientific judgement in deciding whether or not an abnormal laboratory finding or other abnormal assessment is clinically significant.

5. Time period, frequency, and method of detecting adverse events and serious adverse events

The standard time period for collecting and recording SAEs will begin after receipt of the participant's informed consent signature and will end at the concluding visit, which will occur at approximately 48 months following administration of the first dose of study vaccine for each subject. (Amended: 29 Mar 2005) See Section 8 for instructions for reporting and recording SAEs.

Additionally, in order to fulfill international reporting obligations, SAEs that are related to study participation (e.g., procedures, invasive tests, a change from existing therapy) or are related to a concurrent medication will be collected and recorded from the time of consent until the subject completes her concluding visit or withdraws from the study (e.g., early withdrawal from the study, loss to follow-up). (Amended: 29 Mar 2005)

The investigator will record all AEs during the entire active phase (including the approximately 48 month follow-up after consent (Amended: 29 Mar 2005), SAEs during the entire study period, and the onset of chronic illness(es) (diabetes, autoimmune disease, asthma, and allergies), emergency room (ER) visits and physician office visits that are not related to routine physical examination, vaccination, or common acute illnesses such as upper respiratory infection, sinusitis, pharyngitis, gastroenteritis and injury.

The AER and any other relevant forms (e.g., VAR, HV2) (Amended: 29 Mar 2005) will be completed for every report that meets the definition of an adverse event. The investigator will attempt detection of AEs and SAEs in the following ways: For all subjects the investigator will monitor and record the occurrence of reactions in the first 60 (Amended: 31 Oct 2005) minutes following administration of the vaccine at every vaccination visit (baseline [0 month], 1 month and 6 months) using the Vaccine Administration and Reactogenicity Monitoring (VAR) form. In addition, 10% of women will receive home visits from outreach workers 3 to 6 days post vaccination to monitor AEs (vaccination day is defined as day zero for this purpose). The Home Visit Reactogenicity Monitoring (HV2) form will be used for these visits. Spontaneous reports of solicited adverse events that are reported by phone to the physician on-call or in-person during a vaccination visit at the clinic will be documented on the AER (Amended: 29 Mar 2005) form. In addition, the AER form will be completed by fieldworkers during home visit to participants that had unsolicited AEs or SAEs during a vaccination clinic visit or other adverse event for which the physician orders follow-up to be conducted. Adverse events will also be monitored on the Post-Enrollment Eligibility Screener (PES)

**CONFIDENTIAL**

NCI Protocol # 04-C-N191; GSK Protocol # 580299/009 (HPV-009)  
Amendment 5

form which is administered at the one month and six month vaccination visits and at follow-up visits occurring at 12, 18, 24, 30, 36, 42, and 48 months after the first vaccination visit and on the Colposcopy Intake Form (CIF) for women who are referred for colposcopic evaluation. Another surveillance effort will be periodic query to identify study subjects on summary lists of women in the same age range who were admitted to hospitals or ER clinics in Guanacaste and selected referral hospitals outside of Guanacaste. The investigator will evaluate all AEs observed by the investigator or one of his/her clinical collaborators or reported by the subject, whether spontaneously, or in response to a direct question. AEs not previously documented in the study will be recorded on the AER form. The nature of each event, date and time (where appropriate) of onset, outcome, resolution date, intensity and relationship to vaccination will be established.

When an AE/SAE occurs, it is the responsibility of the investigator to review all documentation (e.g., hospital progress notes, laboratory, and diagnostics reports) relative to the event. The investigator will then record all relevant information regarding an AE/SAE on the AER form. There may be instances when the NCI Medical Monitor will request additional abstraction of information from the participant's medical records. GlaxoSmithKline (GSK) Biologicals, hereafter referred to as the IND holder, may also request additional information, but will do so via the NCI Medical Monitor or NCI Project Officer (Amended: 31 Oct 2005). In these instances, all subject identifiers will be removed by the investigator prior to document transmission.

The investigator will attempt to establish a diagnosis of the event based on signs, symptoms, and/or other clinical information. In such cases, the diagnosis should be documented as the AE/SAE and not the individual signs/symptoms.

## **5.1 Solicited adverse events**

For all subjects the investigator will monitor and record the occurrence of reactions in the first 60 (Amended: 31 Oct 2005) minutes following administration of the vaccine at every vaccination visit (baseline [0 month], 1 month and 6 months) using the VAR form. In addition, a random sampling of 10% of the women enrolled in the trial will receive home visits from outreach workers 3 to 6 days after each vaccination to monitor for AEs (vaccination day is defined as day zero). The same randomly selected 10% sample of women will receive home visits after each vaccination. The HV2 form will be used during these 3-6 day post vaccination home visits. With the exception of this sample of 10% of participants who are scheduled to receive a home visit, the AER (Amended: 29 Mar 2005) form will be used to follow up on all other AEs that occur in days 0-6 after vaccination. For example, the AER (Amended: 29 Mar 2005) form will be used to follow up on spontaneously reported AEs as well as AEs that are identified during physician directed home visits.

### **5.1.1 Solicited local (injection site) AEs**

Standardized data will be collected for local injection site AEs on the VAR and HV2 (Amended: 29 Mar 2005) for pain, redness, swelling, and temperature at the injection site. Subjects will be asked, "Do you feel pain at the injection site"? Those who answer "Yes", will be asked to rate the intensity of the pain at the injection site. Possible

**CONFIDENTIAL**

NCI Protocol # 04-C-N191; GSK Protocol # 580299/009 (HPV-009)  
Amendment 5

responses: 1 (Mild), 2 (Moderate), 3 (Severe). (Refer to Section 6 for intensity definitions.)

The following observations will also be made of the injection site:

Area of redness \_\_\_ mm    Area of swelling \_\_\_ mm

Temperature at injection site (“Normal” or “Warmer than surrounding area”)

**5.1.2 Other solicited general AEs**

**5.1.2.1 Sixty-minute (Amended: 31 Oct 2005) post-vaccination monitoring**

Pre-vaccination oral temperature and 60-minute (Amended: 31 Oct 2005) post-vaccination oral temperature are recorded on the VAR form. Standardized data are collected on the VAR form to document the following general solicited AEs: fatigue, myalgia, arthralgia, GI symptoms (nausea, vomiting, diarrhea, and/or abdominal pain), headache, rash (other than urticaria), and urticaria. Subjects reporting any of these solicited symptoms will be asked to rate the intensity of each symptom (mild, moderate, severe). If a solicited general AE meets the criteria of an SAE this is indicated on the form and an AER form is completed.

**5.1.2.2 Home visit reactogenicity monitoring**

Oral temperature is recorded on the HV2 form and any temperature above 39°C is documented on the AER form and followed to resolution. Fever can be classified as an SAE at the discretion of the physician. Subjects providing responses to home visit interviews will be asked whether they experienced the following solicited symptoms since their most recent vaccination: fatigue, pain in their muscles, aches or pain in their joints, GI symptoms (nausea, vomiting, diarrhea, and/or abdominal pain), headache, rash (other than urticaria), and urticaria. Subjects reporting any of these solicited symptoms will be asked to rate the maximum intensity of each symptom (mild, moderate, severe). If a solicited general AE meets the criteria of an SAE, this is indicated on the HV2 form and an AER form is completed.

Possible responses to each solicited symptom: 1 (Yes), 2 (No)

Next they will be asked, “Do you still have this adverse event?”

Possible responses: 1 (Yes), 2 (No)

They will be asked about the maximum intensity of the event: 1=Mild, 2=Moderate, 3=Severe.

Participants will also be asked, “How long have you had/did you have this condition?” 0 (<1 day), 1 (1-2 days), 2 (≥3 days)

### **5.1.2.3 Spontaneous reports of solicited AEs**

Spontaneous reports of AEs will be captured directly on the AER form. (Amended: 29 Mar 2005)

## **5.2 Unsolicited AEs**

The VAR *and* HV2 forms have fields for the collection of information on unsolicited conditions that are observed or reported after vaccination (VAR form) or at the 3-6 day home visit following vaccination for 10% of the women (HV2 form). When completing these forms, if any unsolicited AEs are reported, the person completing the form is instructed to complete an AER form. Also, unsolicited AEs reported outside the context of a clinic visit or a home visit on Days 3-6 after vaccination for 10% of the women will be documented directly on the AER form. (Amended: 29 Mar 2005)

The Post Enrollment Eligibility Screener form (PES) is used at all scheduled post-enrollment clinic appointments. The Colposcopy Intake Form (CIF) is used at the intake visit to the colposcopy clinic. The PES and CIF forms contain essentially identical questions about any hospitalizations, doctor visits, or illnesses lasting more than one day that have occurred since the last study visit. An AER form is to be completed for any such occurrences.

## **6. Evaluating adverse events and serious adverse events**

### **6.1 Assessment of intensity**

The site investigator or designee(s) will be responsible for direct measurements related to several solicited AEs: oral temperature (measured in Celsius), the area of redness and area of swelling at the injection site (measured in millimeters), and temperature at the injection site.

#### **6.1.1 Temperature at injection site**

**(0) Normal:** The injection site is no warmer than the surrounding area.

**(1) Warmer than the surrounding area**

#### **6.1.2 Other signs and symptoms**

The area of local injection site redness/swelling will each be measured in millimeters and recorded on the relevant forms (i.e., the VAR or HV2 form). (Amended: 29 Mar 2005)



**CONFIDENTIAL**

NCI Protocol # 04-C-N191; GSK Protocol # 580299/009 (HPV-009)  
Amendment 5

The maximum intensity of local injection site redness/swelling will be scored for purposes of analysis as follows:

- (0) None
- (1) >0 mm to ≤20 mm
- (2) >20 mm to ≤50 mm
- (3) >50 mm

In addition, the intensity of symptoms will be solicited for the following AEs: pain at the injection site, fatigue, myalgia, arthralgia, GI symptoms (nausea, vomiting, diarrhea and/or abdominal pain), headache, rash (other than urticaria), and urticaria. The following severity/intensity scale will be used for this purpose:

- (0) None
- (1) (Mild) = An AE which is easily tolerated by the subject, causing minimal discomfort and not interfering with everyday activities.
- (2) (Moderate) = An AE which is sufficiently discomforting to interfere with normal everyday activities.
- (3) (Severe)=An AE which prevents normal, everyday activities. (In adults/adolescents, such an AE would, for example, prevent attendance at work/school and would necessitate the administration of corrective therapy.)

For urticaria, maximum intensity of the event will be classified as:

- (1) Urticaria occurring on 1 body area only.
- (2) Urticaria occurring on 2 or 3 body areas.
- (3) Urticaria occurring on at least 4 body areas.

NOTE: An AE that is assessed as severe should not be confused with a Serious Adverse Event. “Severe” is a category utilized for rating the intensity of an event, and both AEs and SAEs can be assessed as “severe”. An event is defined as “serious” when it meets one of the pre-defined outcomes as described in Section 2 above (e.g., adverse events that are life-threatening, fatal, or result in prolonged hospitalization, persistent or significant disability/incapacity, or congenital anomaly).

### **6.1.3 Fever**

Fever will be recorded on the VAR or HV2 (Amended: 29 Mar 2005) form, as appropriate, and will be categorized into severity/intensity categories for analysis purposes according to the following oral temperature cut-offs:

**CONFIDENTIAL**

NCI Protocol # 04-C-N191; GSK Protocol # 580299/009 (HPV-009)  
Amendment 5

- (0) <37.5 °C
- (1) ≥37.5 °C to <38.0 °C
- (2) ≥38.0 °C to 39.0 °C
- (3) >39.0 °C

Fever will be classified as a serious adverse event based on the medical and scientific judgement of the site investigator or designee(s).

## **6.2 Assessment of causality**

The investigator is obligated to assess the relationship between investigational product and the occurrence of each AE/SAE. The investigator will use clinical judgement to determine the relationship. In doing so, alternative causes, such as the natural history of the underlying diseases, concomitant therapy, other risk factors and the temporal relationship of the event to the investigational product will be considered. The investigator will provide this information by completing Part B of the AER form (section to be completed by the physician regarding diagnosis, relationship, additional information, etc.).

The relationship of the adverse event to the vaccination will be coded as follows:

- (0) None
- (1) Possibly related
- (2) Probably related
- (3) Definitely related

The code and signature of the physician, as well as the date that Part B was completed by the physician will be entered on the AER form.

There may be situations when an SAE has occurred and the investigator has minimal information to include in the initial report to the Westat Regulatory Associate; however, it is important that the investigator make an initial assessment of causality for an event prior to transmission of the AER form.

## **7. Follow-up of adverse events and serious adverse events and assessment of outcome**

After the initial AER form is completed, the investigator will follow up and provide information on the subject's condition. The AER form (question 5) identifies the report as either a new event or a follow-up to a previous adverse event.

All AEs and SAEs documented at a previous visit/contact and designated as unresolved will be reviewed at subsequent visits/contacts.

Investigators will follow up subjects:

- with SAEs, until the event has resolved, subsided, stabilized, or disappeared; the event is otherwise explained; or the subject is lost to follow-up;
- or, in the case of other non-serious AEs, until the event has resolved, subsided, stabilized, or disappeared; the subject completes the study; or the subject is lost to follow-up; whichever occurs first.

Clinically significant laboratory abnormalities will be followed up until they have returned to baseline, or a satisfactory explanation has been provided. Reports relative to the subsequent course of an SAE noted for any subject must be submitted to the Westat Regulatory Associate.

The NCI Medical Monitor or IND holder, via the NCI Medical Monitor or NCI Project Officer (Amended: 31 Oct 2005), may request that the investigator obtain additional information from the participant's clinical records to elucidate as fully as possible the nature and/or causality of the AE or SAE. The investigator is obliged to assist. If a subject dies during participation in the study or during a recognized follow-up period, the investigator will obtain copies of any available post-mortem findings, including histopathology, and will forward them to Westat's Regulatory Associate for appropriate distribution.

Updated information will be recorded on new AER forms linked to the original form with an AE number provided by the study data management system. The updated SAE report form should be resent to the Westat Regulatory Associate within 24 hours of receipt of the follow-up information as outlined in Section 8. (Amended: 13 Nov 2008)

Outcome of any non-serious AE (i.e., unsolicited AE) or any SAE reported during the entire study will be assessed as indicated by AER form question 8 (Resolution Code).

01 = Recovered/resolved without sequelae and without intervention

02 = Recovered/resolved without sequelae and with intervention

03 = Recovered/resolved with sequelae

04 = Unresolved

05 = Fatal/Died

06 = Other, specify

## **8. Prompt reporting of serious adverse events**

### **8.1 Time-frame for submitting serious adverse event reports to Westat**

SAEs will be reported promptly to the Westat Regulatory Associate once the investigator determines that the event meets the protocol definition of an SAE (Figure 3). In the event of a life-threatening or fatal SAE, the investigator or designate will telephone the Westat

**CONFIDENTIAL**

NCI Protocol # 04-C-N191; GSK Protocol # 580299/009 (HPV-009)  
Amendment 5

Regulatory Associate to inform him/her about the SAE and also fax the completed AER form and supporting documentation to the Westat HPV Regulatory Associate WITHIN 24 HOURS OF HIS/HER BECOMING AWARE OF THESE EVENTS. **All other SAEs, regardless of relationship, will be reported to the Westat Regulatory Associate within three calendar days of the initial report via email (notification only) and fax (AER form and supporting documentation).** The Westat Regulatory Associate will forward these expedited SAE reports to the NCI Medical Monitor and IND holder within one business day of receipt from Costa Rica, for their review and assessment. Additional or follow-up information relating to the initial SAE report is also reported to Westat within 24 hours of investigator receipt and forwarded from Westat to the NCI Medical Monitor and IND holder within one business day of receipt of such additional information from Costa Rica.

## **8.2 Completion and transmission of serious adverse event reports to Westat**

When an investigator becomes aware of an SAE for a study subject, she/he will report the information to Westat's Regulatory Associate who is responsible for coordinating receipt and distribution of SAE reports to the NCI Medical Monitor and IND holder within the time-frames outlined in Section 8.1 and Figure 3. The AER form will always be completed with all available details of the event, signed by the investigator (or designee), and forwarded to Westat within the designated time-frame. If the investigator does not have all information regarding an SAE, he/she will not wait to receive additional information before notifying the Westat Regulatory Associate of the event by faxing the completed form. The form will be updated when additional information is received and forwarded to Westat as outlined in Section 8.1. The investigator will provide an assessment of causality at the time of the initial report as described in Section 6.2.

Facsimile (fax) transmission of the AER Report Form is the preferred method to transmit SAE information to the Westat Regulatory Associate. In rare circumstances (e.g., the absence of facsimile equipment), notification by telephone is acceptable, with a copy of the AER form sent by overnight mail. Initial notification via the telephone does not replace the need for the investigator to complete, sign, and transmit the AER form as outlined in Section 8.1.

**CONFIDENTIAL**

NCI Protocol # 04-C-N191; GSK Protocol # 580299/009 (HPV-009)  
Amendment 5

**Westat Regulatory Associate for Reporting SAEs**

Mujadala Abdul-Majid, Regulatory Affairs Assistant (Amended: 13 Nov 2008)  
Health Studies Area, Westat, Inc.  
1441 West Montgomery Ave., Westbrook, WB 335  
Rockville, MD 20850  
Tel: 301-738-3642 (direct)  
Urgent phone: 240-453-5661  
Fax: 240-314-2547  
Email: mujadala@westat.com

**Back-up Westat Regulatory Associate for Reporting SAEs**

Meredith Melick (Amended: 31 Oct 2005)  
Westat, Inc.  
1650 Research Blvd., WB 352  
Rockville, MD 20850  
Tel: 240-453-2688 (Amended: 31 Oct 2005) (direct)  
Urgent Phone: 240-453-5661  
Fax: 240-314-2547  
Email: meredithmelick@westat.com (Amended: 31 Oct 2005)

**NCI Medical Monitor for Reporting SAEs**

Mark Schiffman, MD  
6120 Executive Boulevard MSC #7234  
Rockville, MD 20852  
Tel: 301-435-3983  
Fax: 301-402-0916  
Outside office hours  
Tel: 301-279-7040  
Fax: 301-402-0916

**Back-up NCI Medical Monitor for Reporting SAEs**

Diane Solomon, MD  
Division of Cancer Prevention, BGCRG  
6130 Executive Boulevard, Room 2123  
Rockville, MD 20852-7333  
Tel: 301-402-6211  
Fax: 301-480-9939  
Outside office hours  
Tel: 301-343-5585  
Fax: 301-229-8309

**GSK Global Clinical Safety and Pharmacovigilance (GCSP) Email and Fax Addresses for Reporting SAEs and Pregnancy Information**

Fax: 919-483-5404  
Email: us.naps@gsk.com

For general safety inquiries: (Amended: 29 Mar 2005)

Desma Altobelli, PharmD  
Principal Clinical Safety Scientist  
Global Clinical Safety and Pharmacovigilance  
Tel: 919-483-5176  
Fax: 919-483-5404  
E-mail: desma.j.altobelli@gsk.com  
GSK Back-up Study Contact for Reporting SAEs  
GSK Biologicals Clinical Safety Physician  
Tel: +32-2-656 87 98  
Fax: +32-2-656 80 09  
Mobile phone for 7/7 day availability: +32 477 404 713  
24/24 hour and 7/7 day availability

**9. Regulatory reporting requirements for serious adverse events**

The investigator promptly reports SAEs to Westat’s Regulatory Associate, who forwards them to NCI’s Medical Monitor and the IND holder as outlined in Section 8. The holder of the IND is responsible for notifying the Food and Drug Administration (FDA) and other regulatory bodies about the safety of a product under clinical investigation. Prompt reporting of an SAE to the IND holder is essential to meet legal and ethical responsibilities for the safety of all subjects. The IND holder reports SAEs to FDA following these timelines:

| EVENT CATEGORY            | REPORTING TIMELINES                                                                                                                                                                              |
|---------------------------|--------------------------------------------------------------------------------------------------------------------------------------------------------------------------------------------------|
| Non life-threatening      | Within 15 calendar days from the day the sponsor first received knowledge of the event                                                                                                           |
| Life-threatening or Fatal | Notify FDA by phone or fax within 7 calendar days from the day the sponsor first received knowledge of the event, followed by as complete a report as possible within 8 additional calendar days |

The investigator, or responsible person according to local requirements, will comply with the applicable local regulatory requirements related to the reporting of SAEs to local regulatory authorities and the IRB/IEC.

This protocol has been filed under an Investigational New Drug (IND) application with the US Food and Drug Administration (FDA). A given SAE may qualify as an IND Safety Report (INDSR) if the SAE is both attributable to the investigational product and unexpected. In this case, all investigators conducting studies under the IND (and associated INDs for the same compound) will receive an INDSR (previously referred to as Expedited Investigator Safety Report or EISR. (Amended: 29 Mar 2005).

INDSRs are prepared according to the IND holder’s policy and are forwarded by the IND holder to the Westat Regulatory Associate for distribution to NCI and Costa Rica investigators. The purpose of the INDSR is to fulfil specific regulatory and Good Clinical Practice (GCP) requirements regarding the product under investigation. When the NCI and Costa Rica investigators receive an initial or follow-up INDSR or other safety information (e.g., revised Investigator Brochure) from the Westat Regulatory Associate, it will be their responsibility to notify the DSMB and the local and NCI IRBs. (Amended: 29 Mar 2005; EISR revised to INDSR throughout paragraph)

**10. Post study adverse events and serious adverse events**

A post-study AE/SAE is defined as any event that occurs outside of the AE/SAE detection period defined in Section 5. Investigators are not obligated to actively seek AEs or SAEs in former study participants. If the investigator learns of any SAE, including a death, at any time after a subject has been discharged from the study, and considers the event reasonably related to the investigational product, the investigator will notify the sponsor. (Amended: 13 Nov 2008)

## 11. Pregnancy

Urine pregnancy tests are performed at the 0, 1, and 6-month vaccine clinic visits. The investigator, or his/her designee, will record the pregnancy test result for the 0 month vaccination clinic visit on the Initial Visit Eligibility Screener (ES) form and the pregnancy test result for the 1 and 6-month visits on the Post-Enrollment Eligibility Screener (PES) form. Subjects whose pregnancy test yields a positive result at enrollment cannot receive the study vaccine. The participant will be examined for eligibility for the study once again when she is at least three months postpartum and no longer breastfeeding. If the participant is pregnant at the 1-month or 6-month visit she will have her participation in the study deferred until she is at least three months postpartum and no longer breastfeeding. At that time she will be eligible to continue in the study.

The PES, PO (Amended: 13 Nov 2008), PED (Amended: 29 Mar 2005) and CIF forms contain questions about pregnancies and pregnancy outcomes that have occurred since the last study visit. The principal investigator can also receive information about new pregnancies and pregnancy outcomes through other direct or indirect contacts with participants in the study (e.g., at home reminder visits). All new pregnancy and pregnancy outcome information for study participants, whether or not an SAE is involved, will be transmitted to the Westat Regulatory Associate via a read-only electronic mail report within 5 business days (i.e., no longer than **40** business hours) (Amended: 13 Nov 2008, **Amended: 10 September 2009**) of receipt by the principal investigator or designee. The Westat Regulatory Associate will, in turn, transmit the electronic mail to the NCI Medical Monitor and GSK Global Clinical Safety and Pharmacovigilance within one business day of receipt of the electronic mail from Costa Rica, documenting the receipt date, file name and transmittal date. While pregnancy itself is not considered an AE or SAE, all pregnancies will be followed to term.

A complication of pregnancy or delivery will be recorded as an AE or an SAE, as described in Section 1 and Section 2, and will be followed as described in Section 8. (Amended: 13 Nov 2008) A miscarriage is always considered an SAE and will be reported as outlined in Section 8. (Amended: 13 Nov 2008) Furthermore, SAEs occurring as a result of a post-study pregnancy AND which the investigator considers reasonably related in time to receipt of the investigational product, will be reported to the Westat Regulatory Associate as in Section 8. (Amended: 13 Nov 2008) While the investigator is not obligated to actively seek this information from former study participants, he/she may learn of a pregnancy through spontaneous reporting. Information on pregnancies identified during the screening phase/prior to first vaccine administration does not need to be communicated as a safety issue.

## 12. Treatment of adverse events

Treatment of adverse events is at the discretion of the investigator and according to current good medical practice. Medications taken by a subject for treatment of an AE that are either immunosuppressive or that the physician deems may help clarify some aspect of the AE, whether or not administered by a study physician, will be recorded in Part C, section II of the AER form.

HPV-009 Vaccine Efficacy Trial in Costa Rica

Figure 3 Expedited Reporting – Personnel Communication Flow Chart (Amended: 13 Nov 2008)

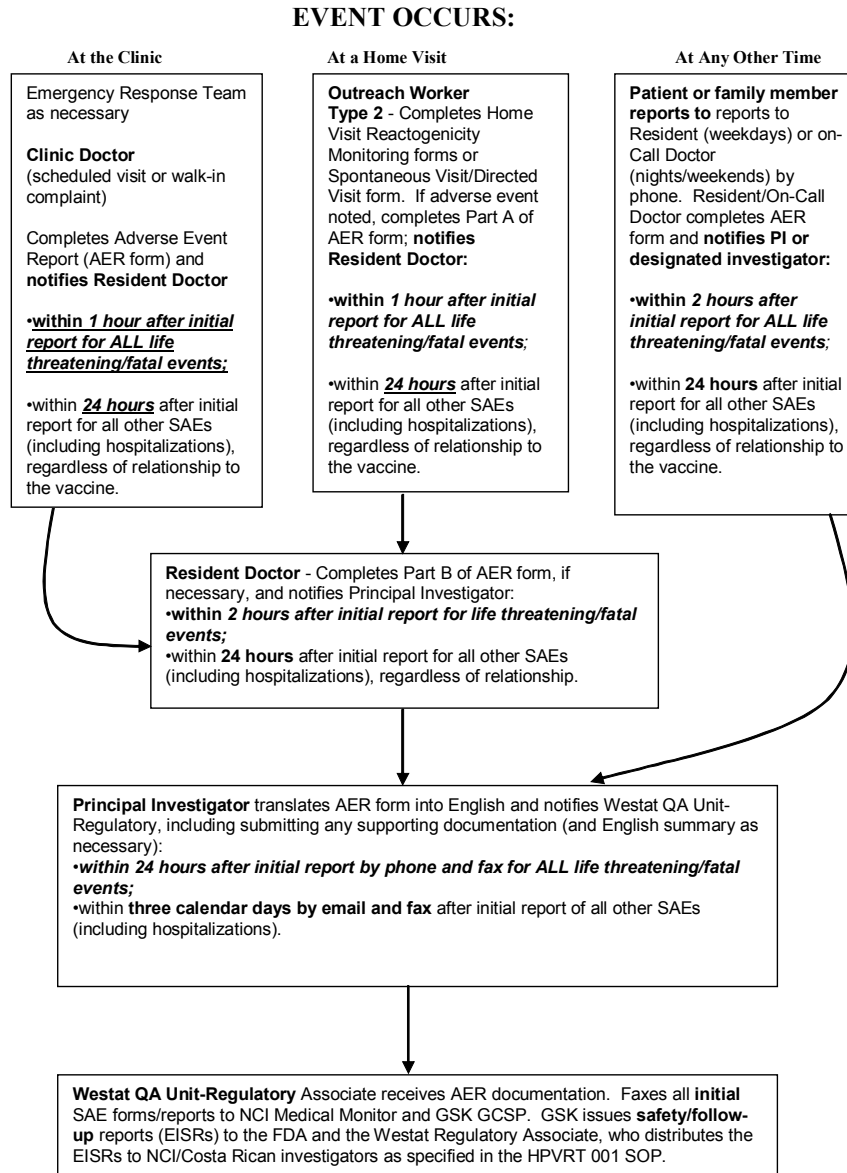



**CONFIDENTIAL**

NCI Protocol # 04-C-N191; GSK Protocol # 580299/009 (HPV-009)  
Amendment 5

**Appendix E HPV16/18 VLP & HAVRIX MSDSs**

**SDS Number 127745      Approved/Revised 1/6/04 Version 03      04:53:16**

**MATERIAL SAFETY DATA SHEET**

PROPHYLACTIC HUMAN PAPILLOMAVIRUS VACCINE

**SECTION 1 IDENTIFICATION OF THE SUBSTANCE/PREPARATION AND OF THE COMPANY/UNDERTAKING**

Material      PROPHYLACTIC HUMAN PAPILLOMAVIRUS VACCINE

Synonyms      HPVpro Vaccine

Company Name      GlaxoSmithKline, Corporate Environment, Health & Safety  
980 Great West Road  
Brentford, Middlesex      TW8 9GS UK  
UK General Information:      +44-20-8047-5000  
Transport Emergency      +44-1865-407333 (EU)  
Medical Emergency      +1-612-221-3999, Ext. 221  
Information and Advice: US number, available 24 hours  
Multi-language response  
GlaxoSmithKline, Corporate Environment, Health & Safety  
2200 Renaissance Blvd, Suite 105  
King of Prussia, PA 19406 US  
US General Information:      +1-888-825-5249  
Transport Emergency      +1-703-527-3887 (non EU)  
US number, available 24 hours  
Multi-language response

**SECTION 2 COMPOSITION / INFORMATION ON INGREDIENTS**

| Ingredients                    | CAS RN     | Percentage |
|--------------------------------|------------|------------|
| HPV-16 L1 VIRUS-LIKE PARTICLES | Unassigned | <0.01      |
| HPV-18 L1 VIRUS-LIKE PARTICLES | Unassigned | <0.01      |
| NON-HAZARDOUS INGREDIENTS      | Unassigned | 99.98      |

**CONFIDENTIAL**

NCI Protocol # 04-C-N191; GSK Protocol # 580299/009 (HPV-009)  
Amendment 5

**SECTION 3 HAZARDS IDENTIFICATION**

|                    |                                                                                                                                                         |
|--------------------|---------------------------------------------------------------------------------------------------------------------------------------------------------|
| Fire and Explosion | This product is classified as non-flammable.                                                                                                            |
| Health             | Handling this product in its final form presents minimal risk from occupational exposure. Health effects information is based on hazards of components. |
| Environment        | No information is available about the potential of this product to produce adverse environmental effects.                                               |

**SECTION 4 FIRST-AID MEASURES**

|              |                                                                                                                                                                                                                                                                                   |
|--------------|-----------------------------------------------------------------------------------------------------------------------------------------------------------------------------------------------------------------------------------------------------------------------------------|
| Ingestion    | Never attempt to induce vomiting. Do not attempt to give any solid or liquid by mouth if the exposed subject is unconscious or semi-conscious. Wash out the mouth with water. If the exposed subject is fully conscious, give plenty of water to drink. Obtain medical attention. |
| Inhalation   | Physical form suggests that risk of inhalation exposure is negligible.                                                                                                                                                                                                            |
| Skin Contact | Using appropriate personal protective equipment, remove contaminated clothing and flush exposed area with large amounts of water. Obtain medical attention if skin reaction occurs, which may be immediate or delayed.                                                            |
| Eye Contact  | Wash immediately with clean and gently flowing water. Continue for at least 15 minutes. Obtain medical attention.                                                                                                                                                                 |

**NOTES TO HEALTH PROFESSIONALS**

|                                                     |                                                                                                   |
|-----------------------------------------------------|---------------------------------------------------------------------------------------------------|
| Medical Treatment                                   | None.                                                                                             |
| Medical Conditions Caused or Aggravated by Exposure | The components contained in this vaccine are generally not considered to cause disease in humans. |
| Antidotes                                           | No specific antidotes are recommended.                                                            |

**SECTION 5 FIRE-FIGHTING MEASURES**

|                            |                                                                      |
|----------------------------|----------------------------------------------------------------------|
| Fire and Explosion Hazards | Not expected for the product, although the packaging is combustible. |
| Extinguishing Media        | Water is recommended for fires involving packaging.                  |

**CONFIDENTIAL**

NCI Protocol # 04-C-N191; GSK Protocol # 580299/009 (HPV-009)  
Amendment 5

- Special Firefighting Procedures For single units (packages): No special requirements needed. For larger amounts (multiple packages/pallets) of product: Since toxic, corrosive or flammable vapours might be evolved from fires involving this product and associated packaging, self contained breathing apparatus and full protective equipment are recommended for firefighters. If possible, contain and collect firefighting water for later disposal.
- Hazardous Combustion Products Toxic, corrosive or flammable thermal decomposition products are expected when the product is exposed to fire.

**SECTION 6 ACCIDENTAL RELEASE MEASURES**

- Personal Precautions Wear protective clothing and equipment consistent with the degree of hazard.
- Environmental Precautions For large spills, take precautions to prevent entry into waterways, sewers, or surface drainage systems.
- Clean-up Methods Collect and place it in a suitable, properly labelled container for recovery or disposal.
- Decontamination Procedures Water can be used for clean-up and decontamination operations. Sodium hypochlorite (bleach) or other strong oxidizers can be used in clean-up decontamination operations. Contaminated surfaces should be washed with water, then bleach or other oxidizing solution, followed by another water wash.

**SECTION 7 HANDLING AND STORAGE**

**HANDLING**

- General Requirements No special control measures required for the normal handling of this product. Normal room ventilation is expected to be adequate for routine handling of this product.

**STORAGE**

No storage requirements necessary for occupational hazards.

**DO NOT FREEZE.** Dispose of properly if frozen.

**CONFIDENTIAL**

NCI Protocol # 04-C-N191; GSK Protocol # 580299/009 (HPV-009)  
Amendment 5

**SECTION 8 EXPOSURE CONTROLS/PERSONAL PROTECTION**

Other Equipment or Procedures      None required for normal handling. Wash hands and arms thoroughly after handling.

**SECTION 9 PHYSICAL AND CHEMICAL PROPERTIES**

Appearance

Clarity                      Turbid liquid after shaking.

Colour                      Colourless supernatant and white deposit after sedimentation.

Physical Form              Suspension.

**SECTION 10 STABILITY AND REACTIVITY**

Stability                      DO NOT FREEZE - dispose of properly if frozen.

Conditions to Avoid      None for normal handling of this product.

**SECTION 11 TOXICOLOGICAL INFORMATION**

Oral Toxicity                Not expected to be toxic following ingestion.

Inhalation Toxicity        No studies have been conducted.

Skin Effects                 Irritation is not expected following direct contact.

Eye Effects                 Irritation is not expected following direct contact with eyes.

Sensitisation               Sensitisation (allergic skin reaction) is not expected.

Genetic Toxicity           Not expected to be genotoxic under occupational exposure conditions.

Carcinogenicity           Not expected to produce cancer in humans under occupational exposure conditions. No components are listed as carcinogens by GSK, IARC, NTP or US OSHA.

Reproductive Effects        Not expected to produce adverse effects on fertility or development under occupational exposure conditions.

**SECTION 12 ECOLOGICAL INFORMATION**

Summary                      No information is available about the potential of this product to produce adverse environmental effects. Local regulations and procedures should be consulted prior to environmental release.

**CONFIDENTIAL**

NCI Protocol # 04-C-N191; GSK Protocol # 580299/009 (HPV-009)  
Amendment 5

**SECTION 13 DISPOSAL CONSIDERATIONS**

|                          |                                                                                                              |
|--------------------------|--------------------------------------------------------------------------------------------------------------|
| Disposal Recommendations | The disposal method for rejected products/returned goods must ensure that they cannot be re-sold or re-used. |
| Regulatory Requirements  | Observe all local and national regulations when disposing of this product.                                   |

**SECTION 14 TRANSPORT INFORMATION**

The SDS should accompany all shipments for reference in the event of spillage or accidental release. Only authorised persons trained and competent in accordance with appropriate national and international regulatory requirements may prepare dangerous goods for transport.

**UN Classification and Labelling**

|                       |                                                                                                                                                                                                           |
|-----------------------|-----------------------------------------------------------------------------------------------------------------------------------------------------------------------------------------------------------|
| Transport Information | Transportation and shipping of this product is not restricted. It has no known, significant hazards requiring special packaging or labelling for air, maritime, US or European ground transport purposes. |
|-----------------------|-----------------------------------------------------------------------------------------------------------------------------------------------------------------------------------------------------------|

**SECTION 15 REGULATORY INFORMATION**

The information included below is an overview of the major regulatory requirements. It should not be considered to be an exhaustive summary. Local regulations should be consulted for additional requirements.

|                                 |                                                                                                                                                 |
|---------------------------------|-------------------------------------------------------------------------------------------------------------------------------------------------|
| EU Classification and Labelling | Exempt from requirements of EU Dangerous Preparations directive - product regulated as a medicinal product, cosmetic product or medical device. |
|---------------------------------|-------------------------------------------------------------------------------------------------------------------------------------------------|

**US OSHA Standard (29 CFR Part 1910.1200)**

|                |                                                                                         |
|----------------|-----------------------------------------------------------------------------------------|
| Classification | This product is exempt from the requirements of the OSHA Hazard Communication Standard. |
|----------------|-----------------------------------------------------------------------------------------|

**Other US Regulations**

|             |        |
|-------------|--------|
| TSCA Status | Exempt |
|-------------|--------|

**SECTION 16 OTHER INFORMATION**

|            |                          |
|------------|--------------------------|
| References | GSK Hazard Determination |
|------------|--------------------------|

|                       |        |                    |   |          |
|-----------------------|--------|--------------------|---|----------|
| Date Approved/Revised | 1/6/04 | SDS Version Number | 3 | 04:53:16 |
|-----------------------|--------|--------------------|---|----------|

**CONFIDENTIAL**

NCI Protocol # 04-C-N191; GSK Protocol # 580299/009 (HPV-009)  
Amendment 5

SDS Sections Updated

| Sections                         | Subsections                            |
|----------------------------------|----------------------------------------|
| HANDLING AND STORAGE             | General Requirements                   |
| HANDLING AND STORAGE             | Handling                               |
| HANDLING AND STORAGE             | Ignition Controls                      |
| HANDLING AND STORAGE             | Protective Systems                     |
| HANDLING AND STORAGE             | Storage                                |
| PHYSICAL AND CHEMICAL PROPERTIES | Autoignition Temperature               |
| PHYSICAL AND CHEMICAL PROPERTIES | Boiling Point                          |
| PHYSICAL AND CHEMICAL PROPERTIES | Clarity                                |
| PHYSICAL AND CHEMICAL PROPERTIES | Colour                                 |
| PHYSICAL AND CHEMICAL PROPERTIES | Conductivity                           |
| PHYSICAL AND CHEMICAL PROPERTIES | Dissociation Constant                  |
| PHYSICAL AND CHEMICAL PROPERTIES | Dust Electrostatic Properties          |
| PHYSICAL AND CHEMICAL PROPERTIES | Dust Explosion                         |
| PHYSICAL AND CHEMICAL PROPERTIES | Evaporation Rate                       |
| PHYSICAL AND CHEMICAL PROPERTIES | Explosive Properties                   |
| PHYSICAL AND CHEMICAL PROPERTIES | Flammability                           |
| PHYSICAL AND CHEMICAL PROPERTIES | Flash Point                            |
| PHYSICAL AND CHEMICAL PROPERTIES | Freezing Point                         |
| PHYSICAL AND CHEMICAL PROPERTIES | Gas Group/T-Rating                     |
| PHYSICAL AND CHEMICAL PROPERTIES | General                                |
| PHYSICAL AND CHEMICAL PROPERTIES | Lower Explosive Limit                  |
| PHYSICAL AND CHEMICAL PROPERTIES | Melting Point                          |
| PHYSICAL AND CHEMICAL PROPERTIES | Octanol Water Distribution Coefficient |

**CONFIDENTIAL**

NCI Protocol # 04-C-N191; GSK Protocol # 580299/009 (HPV-009)  
Amendment 5

|                                  |                                                          |
|----------------------------------|----------------------------------------------------------|
| PHYSICAL AND CHEMICAL PROPERTIES | Odour                                                    |
| PHYSICAL AND CHEMICAL PROPERTIES | Oxidising Properties                                     |
| PHYSICAL AND CHEMICAL PROPERTIES | Oxygen Balance                                           |
| PHYSICAL AND CHEMICAL PROPERTIES | Packaging                                                |
| PHYSICAL AND CHEMICAL PROPERTIES | Particle Size                                            |
| PHYSICAL AND CHEMICAL PROPERTIES | pH of Aqueous Solutions                                  |
| PHYSICAL AND CHEMICAL PROPERTIES | Physical Form                                            |
| PHYSICAL AND CHEMICAL PROPERTIES | Refractive Index                                         |
| PHYSICAL AND CHEMICAL PROPERTIES | Relative Density                                         |
| PHYSICAL AND CHEMICAL PROPERTIES | Solubility (Other)                                       |
| PHYSICAL AND CHEMICAL PROPERTIES | Surface Tension                                          |
| PHYSICAL AND CHEMICAL PROPERTIES | Train Fire                                               |
| PHYSICAL AND CHEMICAL PROPERTIES | Upper Explosive Limit                                    |
| PHYSICAL AND CHEMICAL PROPERTIES | Vapour Density                                           |
| PHYSICAL AND CHEMICAL PROPERTIES | Vapour Pressure                                          |
| PHYSICAL AND CHEMICAL PROPERTIES | Viscosity                                                |
| PHYSICAL AND CHEMICAL PROPERTIES | Volatile Components                                      |
| PHYSICAL AND CHEMICAL PROPERTIES | Water Solubility                                         |
| REGULATORY INFORMATION           | European Union Classification and Labelling Requirements |
| REGULATORY INFORMATION           | Other Regulations                                        |
| REGULATORY INFORMATION           | Other US Regulations - California Proposition 65         |
| REGULATORY INFORMATION           | Other US Regulations – TSCA Status                       |
| REGULATORY INFORMATION           | State Regulations                                        |
| REGULATORY INFORMATION           | Summary                                                  |

**CONFIDENTIAL**

NCI Protocol # 04-C-N191; GSK Protocol # 580299/009 (HPV-009)  
Amendment 5

REGULATORY INFORMATION

US Environmental (EPA)  
Requirements

REGULATORY INFORMATION

US OSHA Standard (29 CFR Part  
1910.1200) - Classification

REGULATORY INFORMATION

US OSHA Standard (29 CFR Part  
1910.1200) - Target Organ Stat

The information and recommendations in this safety data sheet are, to the best of our knowledge, accurate as of the date of issue. Nothing herein shall be deemed to create any warranty, express or implied. It is the responsibility of the user to determine the applicability of this information and the suitability of the material or product for any particular purpose.





**CONFIDENTIAL**

NCI Protocol # 04-C-N191; GSK Protocol # 580299/009 (HPV-009)  
Amendment 5

GlaxoSmithKline, Corporate Environment, Health  
& Safety  
2200 Renaissance Blvd, Suite 105  
King of Prussia, PA 19406 US  
Transport Emergency +1-703-527-3887  
(non EU)  
US number, available 24 hours  
Multi-language response

**SECTION 2 COMPOSITION / INFORMATION ON INGREDIENTS**

| Ingredients               | CAS RN         | Percentage |
|---------------------------|----------------|------------|
| HAVRIX                    | Not applicable |            |
| NON-HAZARDOUS INGREDIENTS | Unassigned     | >99        |

**SECTION 3 HAZARDS IDENTIFICATION**

**Fire and Explosion** This product is classified as non-flammable.

**Health** Handling this product in its final form presents minimal risk from occupational exposure. May produce allergic skin reactions. Possible effects of overexposure in the workplace include: symptoms of hypersensitivity (such as skin rash, hives, itching, and difficulty breathing). Health effects information is based on hazards of components.

**Environment** No information is available about the potential of this product to produce adverse environmental effects.

**SECTION 4 FIRST-AID MEASURES**

**Ingestion** Never attempt to induce vomiting. Do not attempt to give any solid or liquid by mouth if the exposed subject is unconscious or semi-conscious. Wash out the mouth with water. If the exposed subject is fully conscious, give plenty of water to drink. Obtain medical attention.

**Inhalation** Physical form suggests that risk of inhalation exposure is negligible.

**Skin Contact** Using appropriate personal protective equipment, remove contaminated clothing and flush exposed area with large amounts of water. Obtain medical attention if skin reaction occurs, which may be immediate or delayed.

**Eye Contact** Wash immediately with clean and gently flowing water. Continue for at least 15 minutes. Obtain medical attention.

**NOTES TO HEALTH PROFESSIONALS**

**Medical Treatment** None.

**CONFIDENTIAL**

NCI Protocol # 04-C-N191; GSK Protocol # 580299/009 (HPV-009)  
Amendment 5

Medical Conditions Caused or Aggravated by Exposure    The components contained in this vaccine are generally not considered to cause disease in humans.

Antidotes    No specific antidotes are recommended.

**SECTION 5    FIRE-FIGHTING MEASURES**

Fire and Explosion Hazards    Not expected for the product, although the packaging is combustible.

Extinguishing Media    Water is recommended for fires involving packaging.

Special Firefighting Procedures    For single units (packages): No special requirements needed. For larger amounts (multiple packages/pallets) of product: Since toxic, corrosive or flammable vapours might be evolved from fires involving this product and associated packaging, self contained breathing apparatus and full protective equipment are recommended for firefighters. If possible, contain and collect firefighting water for later disposal.

Hazardous Combustion Products    Toxic, corrosive or flammable thermal decomposition products are expected when the product is exposed to fire.

**SECTION 6    ACCIDENTAL RELEASE MEASURES**

Personal Precautions    Wear protective clothing and equipment consistent with the degree of hazard.

Environmental Precautions    For large spills, take precautions to prevent entry into waterways, sewers, or surface drainage systems.

Clean-up Methods    Collect and place it in a suitable, properly labelled container for recovery or disposal.

Decontamination Procedures    Water can be used for clean-up and decontamination operations. Sodium hypochlorite (bleach) or other strong oxidizers can be used in clean-up decontamination operations. Contaminated surfaces should be washed with water, then bleach or other oxidizing solution, followed by another water wash.

**CONFIDENTIAL**

NCI Protocol # 04-C-N191; GSK Protocol # 580299/009 (HPV-009)  
Amendment 5

SECTION 7 HANDLING AND STORAGE

HANDLING

General Requirements No special control measures required for the normal handling of this product. Normal room ventilation is expected to be adequate for routine handling of this product.

STORAGE No storage requirements necessary for occupational hazards. DO NOT FREEZE. Dispose of properly if frozen.

SECTION 8 EXPOSURE CONTROLS/PERSONAL PROTECTION

Other Equipment or Procedures None required for normal handling. Wash hands and arms thoroughly after handling.

SECTION 9 PHYSICAL AND CHEMICAL PROPERTIES

Appearance

Clarity Turbid liquid after shaking.

Colour Colourless supernatant and white deposit after sedimentation.

Physical Form Suspension.

SECTION 10 STABILITY AND REACTIVITY

Stability DO NOT FREEZE - dispose of properly if frozen.

Conditions to Avoid None for normal handling of this product.

SECTION 11 TOXICOLOGICAL INFORMATION

Oral Toxicity Not expected to be toxic following ingestion.

Inhalation Toxicity No studies have been conducted.

Skin Effects Irritation is not expected following direct contact.

Eye Effects Irritation is not expected following direct contact with eyes.

Sensitisation Allergic skin reactions might occur following dermal exposure. Assessment based upon effects of structurally similar substances. Respiratory sensitisation (allergic) reactions might occur following exposure.

Genetic Toxicity Not expected to be genotoxic under occupational exposure conditions.

**CONFIDENTIAL**

NCI Protocol # 04-C-N191; GSK Protocol # 580299/009 (HPV-009)  
Amendment 5

- Carcinogenicity Not expected to produce cancer in humans under occupational exposure conditions. No components are listed as carcinogens by GSK, IARC, NTP or US OSHA.
- Reproductive Effects Not expected to produce adverse effects on fertility or development under occupational exposure conditions.

**SECTION 12 ECOLOGICAL INFORMATION**

- Summary No information is available about the potential of this product to produce adverse environmental effects. Local regulations and procedures should be consulted prior to environmental release.

**SECTION 13 DISPOSAL CONSIDERATIONS**

- Disposal Recommendations The disposal method for rejected products/returned goods must ensure that they cannot be re-sold or re-used.
- Regulatory Requirements Observe all local and national regulations when disposing of this product.

**SECTION 14 TRANSPORT INFORMATION**

The SDS should accompany all shipments for reference in the event of spillage or accidental release. Only authorised persons trained and competent in accordance with appropriate national and international regulatory requirements may prepare dangerous goods for transport.

**UN Classification and Labelling**

- Transport Information Transportation and shipping of this product is not restricted. It has no known, significant hazards requiring special packaging or labelling for air, maritime, US or European ground transport purposes.

**SECTION 15 REGULATORY INFORMATION**

The information included below is an overview of the major regulatory requirements. It should not be considered to be an exhaustive summary. Local regulations should be consulted for additional requirements.

**EU Classification and Labelling**

Exempt from requirements of EU Dangerous Preparations directive - product regulated as a medicinal product, cosmetic product or medical device.

**US OSHA Standard (29 CFR Part 1910.1200)**

- Classification This product is exempt from the requirements of the OSHA Hazard Communication Standard.

**CONFIDENTIAL**

NCI Protocol # 04-C-N191; GSK Protocol # 580299/009 (HPV-009)  
Amendment 5

Other US Regulations

TSCA Status Exempt

SECTION 16 OTHER INFORMATION

References GSK Hazard Determination

Date Approved/Revised 1/6/04 SDS Version Number 12 04:45:31

SDS Sections Updated

Sections

Subsections

PHYSICAL AND CHEMICAL PROPERTIES

REGULATORY INFORMATION

European Union Classification and  
Labelling Requirements

The information and recommendations in this safety data sheet are, to the best of our knowledge, accurate as of the date of issue. Nothing herein shall be deemed to create any warranty, express or implied. It is the responsibility of the user to determine the applicability of this information and the suitability of the material or product for any particular purpose.

**Appendix F PROTOCOL AMENDMENTS AND MODIFICATIONS****Amendment 1: 29 March 2005**

|                                                                                                                                                                                                                                                                                                                                                                                                                                                                                                                                                                                                                                                                                                                                                                                                                                                                                                                                                                                                                         |                                                                                                                                                                                                                                                                                                                                                 |
|-------------------------------------------------------------------------------------------------------------------------------------------------------------------------------------------------------------------------------------------------------------------------------------------------------------------------------------------------------------------------------------------------------------------------------------------------------------------------------------------------------------------------------------------------------------------------------------------------------------------------------------------------------------------------------------------------------------------------------------------------------------------------------------------------------------------------------------------------------------------------------------------------------------------------------------------------------------------------------------------------------------------------|-------------------------------------------------------------------------------------------------------------------------------------------------------------------------------------------------------------------------------------------------------------------------------------------------------------------------------------------------|
| <b>GlaxoSmithKline Biologicals</b>                                                                                                                                                                                                                                                                                                                                                                                                                                                                                                                                                                                                                                                                                                                                                                                                                                                                                                                                                                                      |                                                                                                                                                                                                                                                                                                                                                 |
| Clinical Research & Development                                                                                                                                                                                                                                                                                                                                                                                                                                                                                                                                                                                                                                                                                                                                                                                                                                                                                                                                                                                         |                                                                                                                                                                                                                                                                                                                                                 |
| <b>Amendment Approval Form</b>                                                                                                                                                                                                                                                                                                                                                                                                                                                                                                                                                                                                                                                                                                                                                                                                                                                                                                                                                                                          |                                                                                                                                                                                                                                                                                                                                                 |
| <b>CPMS number</b>                                                                                                                                                                                                                                                                                                                                                                                                                                                                                                                                                                                                                                                                                                                                                                                                                                                                                                                                                                                                      | NCI Protocol: 04-C-N191<br>GSK Biologicals Protocol: 580299/009 (HPV-009)                                                                                                                                                                                                                                                                       |
| <b>Protocol title:</b>                                                                                                                                                                                                                                                                                                                                                                                                                                                                                                                                                                                                                                                                                                                                                                                                                                                                                                                                                                                                  | A double blind, controlled, randomized, phase III study of the efficacy of an HPV16/18 VLP vaccine in the prevention of advanced cervical intraepithelial neoplasia (CIN2, CIN3, adenocarcinoma <i>in situ</i> [AIS] and invasive cervical cancer) associated with HPV16 or HPV18 cervical infection in healthy young adult women in Costa Rica |
| <b>Amendment no.</b>                                                                                                                                                                                                                                                                                                                                                                                                                                                                                                                                                                                                                                                                                                                                                                                                                                                                                                                                                                                                    | 1                                                                                                                                                                                                                                                                                                                                               |
| <b>Amendment date:</b>                                                                                                                                                                                                                                                                                                                                                                                                                                                                                                                                                                                                                                                                                                                                                                                                                                                                                                                                                                                                  | 1 March 2005                                                                                                                                                                                                                                                                                                                                    |
| <b>Coordinating author:</b>                                                                                                                                                                                                                                                                                                                                                                                                                                                                                                                                                                                                                                                                                                                                                                                                                                                                                                                                                                                             | Diane C Sullivan, RN (Manager, Pediatric Vaccines)                                                                                                                                                                                                                                                                                              |
| <b>Rationale/background for changes:</b> The primary reasons for this amendment are:                                                                                                                                                                                                                                                                                                                                                                                                                                                                                                                                                                                                                                                                                                                                                                                                                                                                                                                                    |                                                                                                                                                                                                                                                                                                                                                 |
| <ul style="list-style-type: none"> <li>• to clarify the referral of women with evidence of ASC-H and AGC for colposcopic evaluation in Section 3.1,</li> <li>• to correct the instructions with regard to the reporting of concomitant medications for all AEs, not just those considered as serious in Section 3.9,</li> <li>• to further clarify the period of observation for the primary analysis of efficacy in Section 4.2,</li> <li>• to replace all references to the Spontaneous Report (SR) form with the Adverse Event Report (AER) form in Section 3.14 and in multiple sections of Appendix D,</li> <li>• to further clarify the timing of AE reporting, the SAE contact information and replacement of the Expedited Investigator Safety Report (EISR) with IND Safety Report (INDSR) in Appendix D,</li> <li>• to expand the pregnancy reporting period in Section 11 of Appendix D, and</li> <li>• to reformat the protocol to ensure it is compliant with electronic publishing guidelines.</li> </ul> |                                                                                                                                                                                                                                                                                                                                                 |
| Other minor revisions have been made and are noted throughout the protocol in <b><i>bold, italic</i></b> text.                                                                                                                                                                                                                                                                                                                                                                                                                                                                                                                                                                                                                                                                                                                                                                                                                                                                                                          |                                                                                                                                                                                                                                                                                                                                                 |
| Details of the revision and identification of the affected protocol sections are provided below. <b>Amended text has been included in bold, italic text and deleted text is shown with strikethrough.</b>                                                                                                                                                                                                                                                                                                                                                                                                                                                                                                                                                                                                                                                                                                                                                                                                               |                                                                                                                                                                                                                                                                                                                                                 |

**CONFIDENTIAL**

**Sponsor Signatory page:**

Gary Dubin, MD, Vice President, ~~Worldwide STD Vaccines Clinical Development Programs and US Adult Vaccines Franchise~~ **Worldwide Clinical Development, HPV Vaccines (Amended: 29 Mar 2005)**

**Investigator Agreement**

I agree:

- Not to implement any changes to the protocol without agreement from the sponsors (*NCI and GSK Biologicals*) (Amended: 29 Mar 2005) and prior review and written approval from the Institutional Review Board (IRB) or Independent Ethics Committee (IEC), ...
- That I have been informed that certain regulatory authorities require the sponsor (*GSK Biologicals*) (Amended: 29 Mar 2005) to obtain and supply, as necessary, details about the investigator’s ownership interest in the sponsor or the investigational product, and more generally about his/her financial ties with the sponsor (*GSK Biologicals*) (Amended: 29 Mar 2005). GSK Biologicals will use and disclose the information solely for the purpose of complying with regulatory requirements.

**List of Abbreviations**

|               |                                                                      |
|---------------|----------------------------------------------------------------------|
| <i>INDSR:</i> | <i>Investigational New Drug Safety Report (Amended: 29 Mar 2005)</i> |
| <i>MSDS:</i>  | <i>Material Safety Data Sheet (Amended: 29 Mar 2005)</i>             |
| <i>SR:</i>    | <i>Spontaneous Report form-(Deleted: 29 Mar 2005)</i>                |

**SYNOPSIS**

**Rationale**

The trial will enroll approximately 15,000 healthy young women... or with 720 enzyme-linked immunoabsorbent assay (ELISA) units of GSK *Biologicals*’ (Amended: 29 Mar 2005) hepatitis A vaccine, inactivated (Havrix®) prepared as an investigational formulation.

**Study Design (continued)**

- **Duration of the study:**
- At least 30 confirmed cases of CIN2+ associated with HPV16 or HPV18 cervical infection are observed and a minimum (Amended: 29 Mar 2005) follow-up period of two years is achieved, pending review and approval of the final statistical analysis plan by the DSMB.

**1.1 Background**

*Results from a recently completed Phase IIb trial conducted by GSK Biologicals confirm the finding and extend it to HPV18.* ~~Unpublished results (manuscript in preparation) from a recently completed phase IIb trial conducted by GSK Biologicals confirm the finding and extend it to HPV18.~~ (Amended: 29 Mar 2005)



### 3.1 Overview of the Trial

Women with evidence of HSIL, *ASC-H*, *AGC* (*Amended: 29 Mar 2005*) or persistent ASC-US+/LSIL at any time during the study will be referred for colposcopic evaluation and subsequent excisional treatment, if needed.

### 3.9 Concomitant Medications/Vaccination

...Also, concomitant medications administered during this study will be collected in the context of assessing **SAEs**. In specific, we will collect information on medications/vaccinations that are taken in the month preceding an **SAE** and those that are taken to treat an **SAE** if it is felt that the medication used to treat the **SAE** can help clarify the diagnosis of the **SAE** or if the medication is an immunosuppressant. (*Amended: 29 Mar 2005; SAE revised to AE throughout paragraph*)

### 3.12 Active Follow-up of Participants (Months 12-48)

- An interview to obtain information on ~~potential vaccine~~ (*Amended: 29 Mar 2005*) AEs, including hospitalizations, incapacitation lasting more than one day, pregnancies, and other events reported by participants. AEs and SAEs are further defined in APPENDIX IV.

### 3.14 Adverse Events Monitoring

- **Long-term passive monitoring.** The ~~Spontaneous Report and Adverse Event Report~~ (*Amended: 29 Mar 2005*) form will be used to document all AEs reported through this mechanism. ~~This~~ These forms ~~is~~ are provided separately from this protocol. (*Amended: 29 Mar 2005*)

#### 3.19.5 HPV DNA Testing by Hybrid Capture® 2 (HCII)

(for baseline/exit assessment and triage of ASC cytology)

An ASC-*US* cytologic interpretation will lead to “reflex” HCII testing and for the purposes of clinical management subjects who have HCII positive (or HCII-inadequate) ASC-*US* will be treated the same as an LSIL ~~and subjects who have a HCII positive (or HCII-inadequate) ASC-H will be treated the same as an HSIL~~ (*Amended: 29 Mar 2005*).

### 4.2 Primary Analysis for Efficacy

- At least 30 confirmed cases of CIN2+ associated with HPV16 or HPV18 cervical infection that are eligible for the ATP analysis are observed and **the last woman recruited into the study has completed** a minimum ~~median~~ follow-up period of two years ~~is achieved~~, pending review and approval of the final statistical analysis plan by the DSMB. (*Amended: 29 Mar 2005*)

Assuming 15,000 women enroll, ... The requirement of a minimum ~~median~~ (*Amended: 29 Mar 2005*) follow-up time of two years was chosen to guard against analyses that are biased by early events only, which in the case of CIN2+ among young women might not be representative of true cancer precursors.

## 6 Human Subjects Protection

The HPV16/18 VLP Vaccine Trial will be conducted in compliance with regulations for human subject research in effect in Costa Rica and the United States [The Belmont Report & Title 45 Code of Federal Regulations, Part 46, Protection of Human Subjects, and Declaration of Helsinki 1996, *including its 2000 amendment (Amended: 29 Mar 2005)*].

## 9 PROJECTED Timetable

|                                                                  |                                                                 |
|------------------------------------------------------------------|-----------------------------------------------------------------|
| Review of Protocol by External Advisory Group                    | Mar. '03                                                        |
| Submission of Concept Protocol to the FDA                        | June '03                                                        |
| NCI Human Subjects Annual Review                                 | Jul. '03                                                        |
| Costa Rican Human Subjects Annual Review                         | Aug. '03                                                        |
| Submission of CMC & Full Study Protocol to FDA                   | Jan. '04                                                        |
| First Batch of Vaccine Doses for Study Delivered to Costa Rica   | Apr. '04                                                        |
| Training                                                         | May '04                                                         |
| Initiation of Main Trial ( <i>Amended: 29 Mar 2005</i> )         | June 28, '04                                                    |
| Enrollment of Participants ( <i>Amended: 29 Mar 2005</i> )       | June '04 – <del>Sep</del> <i>Oct.</i> '05                       |
| Vaccination of Participants                                      | June '04 – Apr. '06                                             |
| Active Follow-up of Participants ( <i>Amended: 29 Mar 2005</i> ) | June '04 – <del>Sep</del> <i>Oct.</i> '09                       |
| Study Close-out ( <i>Amended: 29 Mar 2005</i> )                  | <del>Oct</del> <i>Nov.</i> '09 – <del>Jan</del> <i>Feb.</i> '10 |

## APPENDIX D: CRITERIA FOR DEFINING ADVERSE EVENTS (AEs), SERIOUS AEs (SAEs), AND PROCEDURES FOR AND TIMING OF AE REPORTING

### 5. Time period, frequency, and method of detecting adverse events and serious adverse events

The standard time period for collecting and recording SAEs will begin *after receipt of the participant's informed consent signature* and will end *at the concluding visit, which will occur at approximately 48 months* following administration of the first dose of study vaccine for each subject. (*Amended: 29 Mar 2005*)...

Additionally, in order to fulfill international reporting obligations, SAEs that are related to study participation (e.g., procedures, invasive tests, a change from existing therapy) or are related to a concurrent medication will be collected and recorded from the time of ~~enrolment~~ ~~vaccination~~ (~~Month 0~~) *consent* until the subject completes ~~48 months of follow-up from the vaccination~~ *her concluding visit* or withdraws from the study (e.g., early withdrawal from the study, loss to follow-up). (*Amended: 29 Mar 2005*)

The investigator will record all AEs during the entire active phase (including the *approximately 48-month follow-up after administration of the first dose of vaccine at Month 0 consent* (*Amended: 29 Mar 2005*), ...

**CONFIDENTIAL**

NCI Protocol # 04-C-N191; GSK Protocol # 580299/009 (HPV-009)  
Amendment 5

The AER and any other relevant forms [e.g., VAR, HV2, SR (*Amended: 29 Mar 2005*)] will be completed for every report that meets the definition of an adverse event.

...Spontaneous reports of solicited adverse events that are reported by phone to the physician on-call or in-person during a vaccination visit at the clinic will be documented on the ~~Spontaneous Report/Directed Visit, SR~~ *Adverse Event Report (AER)* form (*Amended: 29 Mar 2005*).

## 5.1 Solicited adverse events

...With the exception of this sample of 10% of participants who are scheduled to receive a home visit, the ~~SR~~ *AER* (*Amended: 29 Mar 2005*) form will be used to follow up on all other AEs that occur in days 0-6 after vaccination. For example, the ~~SR~~ *AER* (*Amended: 29 Mar 2005*) form will be used to follow up on spontaneously reported AEs as well as AEs that are identified during physician directed home visits.

### 5.1.1 Solicited local (injection site) AEs

Standardized data will be collected for local injection site AEs on the VAR *and*, HV2 *and* ~~SR~~ (*Amended: 29 Mar 2005*) for pain, redness, swelling, and temperature at the injection site.

### 5.1.2.3 Spontaneous reports of solicited AEs

Spontaneous reports of AEs will be captured *directly* on the *AER* ~~SR~~ form. ~~For each solicited general AE that is reported, the same format that is used on the HV2 form will be used to record AE information on the SR form (i.e., does the woman still have the condition, what was the maximum intensity of the condition, and how long did she have the condition). If a solicited general AE meets the criteria of a SAE, this is indicated on the SR form and an AER form is completed. (Amended: 29 Mar 2005)~~

## 5.2 Unsolicited AEs

The VAR, ~~SR~~ *and* HV2 forms have fields for the collection of information on unsolicited conditions that are observed or reported after vaccination (VAR form) or ~~since the last study visit~~ *at the 3-6 day home visit following vaccination for 10% of the women* (HV2, ~~SR~~ forms). When *completing these forms, if* any unsolicited AEs are reported, the person completing the form is instructed to complete an AER. *Also, unsolicited AEs reported outside the context of a clinic visit or a home visit on Days 3-6 after vaccination for 10% of women will be documented directly on the AER form. (Amended: 29 Mar 2005)*

## 6. Evaluating adverse events and serious adverse events

### 6.1.2 Other signs and symptoms

The area of local injection site redness/swelling will each be measured in millimeters and recorded on the relevant forms (i.e., the VAR, ~~SR~~ *or* HV2 form). (*Amended: 29 Mar 2005*)

**CONFIDENTIAL**

**6.1.3 Fever**

Fever will be recorded on the VAR, ~~SR~~ or HV2 (*Amended: 29 Mar 2005*) form, as appropriate, and will be categorized into severity/intensity categories for analysis purposes according to the following oral temperature cut-offs:

**8. Prompt reporting of serious adverse events**

**8.2 Completion and transmission of serious adverse event reports to Westat**

|                                                                                                                                                                                                                                                                                                                                                                                                                                                                                                                                                                                                                                                                   |
|-------------------------------------------------------------------------------------------------------------------------------------------------------------------------------------------------------------------------------------------------------------------------------------------------------------------------------------------------------------------------------------------------------------------------------------------------------------------------------------------------------------------------------------------------------------------------------------------------------------------------------------------------------------------|
| <p style="text-align: center;"><b>Westat Regulatory Associate for Reporting SAEs</b><br/><i>Mujadala Abdul-Majid, Regulatory Affairs Assistant (Amended: 29 Mar 2005)</i><br/>Health Studies Area, Westat, Inc.<br/>1441 West Montgomery Ave., Westbrook WB 335<br/>Rockville, MD 20850<br/>Tel: 301-738-3642 (direct)<br/>Urgent phone: 240-453-5661<br/>Fax: 240-314-2547<br/>Email: <a href="mailto:mujadala@westat.com">mujadala@westat.com</a></p> <p>Zari Anthony, MS, Regulatory Associate<br/>1650 Research Blvd., WB 329<br/>Tel: 240-453-5643<br/>Email: <a href="mailto:zarianthony@westat.com">zarianthony@westat.com</a></p>                         |
| <p style="text-align: center;"><b>GSK Global Clinical Safety and Pharmacovigilance (GCSP) Email and Fax Addresses for Reporting SAEs and Pregnancy Information</b></p> <p><b>For general safety inquiries:</b><br/><i>Desma Altobelli, PharmD (Amended: 29 Mar 2005)</i><br/>Principal Clinical Safety Scientist<br/>Global Clinical Safety and Pharmacovigilance<br/>Tel: 919-483-5176<br/>Fax: 919-483-5404<br/>E-Mail: <a href="mailto:desma.j.altobelli@gsk.com">desma.j.altobelli@gsk.com</a></p> <p>Amy W. Mertrud, RPh<br/>Senior Clinical Safety Scientist<br/><a href="mailto:Amy.e.mertrud@gsk.com">Amy.e.mertrud@gsk.com</a><br/>Tel: 919-483-5417</p> |

**9. Regulatory reporting requirements for serious adverse events**

...A given SAE may qualify as an IND Safety Report (*INDSR*) if the SAE is both attributable to the investigational product and unexpected. In this case, all investigators conducting studies under the IND (and associated INDs for the same compound) will receive an *INDSR (previously referred to as Expedited Investigator Safety Report or EISR)* identical in content to the IND Safety Report submitted to the FDA. (*Amended: 29 Mar 2005*)

*INDSRs* ~~EISR~~ are prepared according to the IND holder's policy and are forwarded by the IND holder to the Westat Regulatory Associate for distribution to NCI and Costa Rica investigators. The purpose of the *INDSR* ~~EISR~~ is to fulfil specific regulatory and Good Clinical Practice (GCP) requirements regarding the product under investigation. When the NCI and Costa Rica investigators receive an initial or follow-up *INDSR* ~~EISR~~ or

**CONFIDENTIAL**

NCI Protocol # 04-C-N191; GSK Protocol # 580299/009 (HPV-009)

Amendment 5

other safety information (e.g., revised Investigator Brochure) from the Westat Regulatory Associate, it will be their responsibility to notify the DSMB and the local and NCI IRBs. *(Amended: 29 Mar 2005)*

**11. Pregnancy**

The PES, *PED*, ~~SR~~ and CIF forms contain questions about pregnancies and pregnancy outcomes that have occurred since the last study visit. *(Amended: 29 Mar 2005)*...

All new pregnancy and pregnancy outcome information for study participants, whether or not an SAE is involved, will be transmitted to the Westat Regulatory Associate via a read-only electronic mail report within ~~72 hours~~ **3-5 days (i.e., no longer than 120 hours)** *(Amended: 29 Mar 2005)* of receipt by the principal investigator or designee.

**Amendment 2: 31 October 2005**

|                                                                                                                                                                                                                                                                                                                                                                                                                                                                                                                                                                                                                                                                              |                                                                                                                                                                                                                                                                                                                                                 |
|------------------------------------------------------------------------------------------------------------------------------------------------------------------------------------------------------------------------------------------------------------------------------------------------------------------------------------------------------------------------------------------------------------------------------------------------------------------------------------------------------------------------------------------------------------------------------------------------------------------------------------------------------------------------------|-------------------------------------------------------------------------------------------------------------------------------------------------------------------------------------------------------------------------------------------------------------------------------------------------------------------------------------------------|
| <b>GlaxoSmithKline Biologicals</b>                                                                                                                                                                                                                                                                                                                                                                                                                                                                                                                                                                                                                                           |                                                                                                                                                                                                                                                                                                                                                 |
| Clinical Research & Development                                                                                                                                                                                                                                                                                                                                                                                                                                                                                                                                                                                                                                              |                                                                                                                                                                                                                                                                                                                                                 |
| <b>Amendment Approval Form</b>                                                                                                                                                                                                                                                                                                                                                                                                                                                                                                                                                                                                                                               |                                                                                                                                                                                                                                                                                                                                                 |
| <b>CPMS number</b>                                                                                                                                                                                                                                                                                                                                                                                                                                                                                                                                                                                                                                                           | NCI Protocol: 04-C-N191<br>GSK Biologicals Protocol: 580299/009 (HPV-009)                                                                                                                                                                                                                                                                       |
| <b>Protocol title:</b>                                                                                                                                                                                                                                                                                                                                                                                                                                                                                                                                                                                                                                                       | A double blind, controlled, randomized, phase III study of the efficacy of an HPV16/18 VLP vaccine in the prevention of advanced cervical intraepithelial neoplasia (CIN2, CIN3, adenocarcinoma <i>in situ</i> [AIS] and invasive cervical cancer) associated with HPV16 or HPV18 cervical infection in healthy young adult women in Costa Rica |
| <b>Amendment no.</b>                                                                                                                                                                                                                                                                                                                                                                                                                                                                                                                                                                                                                                                         | 2                                                                                                                                                                                                                                                                                                                                               |
| <b>Amendment date:</b>                                                                                                                                                                                                                                                                                                                                                                                                                                                                                                                                                                                                                                                       | 31 October 2005                                                                                                                                                                                                                                                                                                                                 |
| <b>Coordinating author:</b>                                                                                                                                                                                                                                                                                                                                                                                                                                                                                                                                                                                                                                                  | Diane C Sullivan, RN (Manager, Pediatric Vaccines)                                                                                                                                                                                                                                                                                              |
| <b>Rationale/background for changes:</b> The primary reasons for this amendment are:                                                                                                                                                                                                                                                                                                                                                                                                                                                                                                                                                                                         |                                                                                                                                                                                                                                                                                                                                                 |
| <ul style="list-style-type: none"> <li>• Increasing the post-vaccination observation period from 30 to 60 minutes at the request of the local IRB. Many of the study centers are located in remote areas of Costa Rica where there is limited access to medical care, so to assure that there is no immediate severe reaction to vaccination, the observation period has been increased.</li> <li>• Expanded explanation for the deferment of enrollment or vaccination visit for menstrual delay or pregnancy.</li> <li>• A change to the “Back-up Westat Regulatory Associate for Reporting SAEs”.</li> <li>• Expanded period of recruitment (16 to 18 months).</li> </ul> |                                                                                                                                                                                                                                                                                                                                                 |
| Other minor revisions have been made and are noted throughout the protocol in <b><i>bold, italic</i></b> text.                                                                                                                                                                                                                                                                                                                                                                                                                                                                                                                                                               |                                                                                                                                                                                                                                                                                                                                                 |
| Details of the revision and identification of the affected protocol sections are provided below. <b>Amended text has been included in bold, italic text and deleted text is shown with strikethrough.</b>                                                                                                                                                                                                                                                                                                                                                                                                                                                                    |                                                                                                                                                                                                                                                                                                                                                 |

**CONFIDENTIAL**

NCI Protocol # 04-C-N191; GSK Protocol # 580299/009 (HPV-009)

Amendment 5

**Study Design**      **Enrollment:** Population-based, ages 18-25, N= ~15,000 (of ~20,000 who will be invited, based on 2000 census data). The expected enrollment period is ~~46~~ **18** (*Amended: 31 Oct 2005*) months.

**Safety assessments:**

In all subjects during the ~~30~~ **60**-minute (*Amended: 31 Oct 2005*) post-vaccination period, solicited local AEs (pain, redness, swelling and temperature at the injection site) and solicited general AEs with new onset or aggravation since vaccination (fever, fatigue, myalgia, arthralgia, gastrointestinal symptoms, headache, rash [other than urticaria] and urticaria) will be assessed.

**Endpoints**      **Secondary**

1. Safety
  - Occurrence and intensity of solicited local AEs and occurrence (either onset or aggravation) of solicited general AEs including urticaria within ~~30~~ **60** (*Amended: 31 Oct 2005*) minutes after vaccination.

### **3. Methods**

#### **3.1 Overview of the Trial**

...The initial vaccination will be performed at entry, and additional vaccine doses will be given at one and six months following the initial vaccination. Women will be monitored at the clinic for a minimum of ~~30~~ **60** (*Amended: 31 Oct 2005*) minutes following each vaccination, during which study personnel will collect information on reactogenicity of the vaccine. ...

#### **3.3.3 Deferral Criteria**

Women will have their enrollment into the trial *and/or vaccination visits* (*Amended: 31 Oct 2005*) deferred if they:

- Received immunoglobulins within 90 days preceding enrollment/*vaccination visit* (*Amended: 31 Oct 2005*).
- Received a registered vaccine within 30 days of enrollment/*vaccination visit*. Administration of routine Meningococcal, Hepatitis B, Influenza, and Diphtheria/Tetanus vaccines up to 8 days before *any* ~~the first~~ dose of study vaccine is allowed. (*Amended: 31 Oct 2005*)
- Are suffering from an acute disease or have an oral temperature  $\geq 37.5^{\circ}\text{C}$  at enrollment/*vaccination visit* (*Amended: 31 Oct 2005*). Acute disease is defined as the presence of a moderate or severe illness with or without fever. Vaccines can be administered to women with a minor illness such as diarrhea and mild upper respiratory infection.
- Are pregnant, less than three months post-partum, or breastfeeding at the time of enrollment/*vaccination visit*. If the participant reports a *menstrual delay and her pregnancy test is negative*, ~~missed period~~ she will be deferred *for a minimum of seven days* ~~independently of the results of her pregnancy test~~. *Women with a second negative pregnancy test after the minimal deferral period would be eligible for enrollment/vaccination. A menstrual delay is defined as a delay of more than five*

*days for women with regular menses and more than 35 days for women with irregular menses. (Amended: 31 Oct 2005)*

- Are sexually experienced and using an effective method of birth control (including abstinence) for less than 30 days at the time of enrollment/*vaccination visit* (Amended: 31 Oct 2005).

### **3.7 Selection of an Investigational Formulation of *Havrix* as the Control Vaccine**

Second, *Havrix* 720 EL.U./0.25 mg Alum in 0.5 mL (pediatric formulation) is currently licensed in the US for use in children aged *12 months* (Amended: 31 Oct 2005) <sup>2</sup> to 18 years on a 0, 6-12 month schedule. The 720 EL.U. dose has been demonstrated to be safe for use in children in numerous clinical trials and through post-marketing surveillance. This suggests that the formulation can be safely administered to adults.

#### **3.11. Clinic Visits During Vaccination Phase (0, 1, 6, & 7 months)**

Three clinic visits are planned for vaccination at 0, 1, and 6 months. At the first clinic visit, we will collect information for determining eligibility, ensure that written informed consent has been obtained prior to any study procedure, perform urine pregnancy testing, assign treatment arm by randomization, give the initial vaccination, and monitor women for at least ~~30~~ *60* (Amended: 31 Oct 2005) minutes following vaccination with appropriate medical treatment readily available in case of a rare anaphylactic reaction. At the two subsequent visits at 1 and 6 months, information on AEs will be collected, subsequent vaccinations will be administered, and women will be monitored for a minimum of ~~30~~ *60* (Amended: 31 Oct 2005) minutes following vaccination with appropriate medical treatment readily available in case of a rare anaphylactic reaction. After each vaccination visit, women will be provided with two 500 mg acetaminophen pills with an indication to take the medication in case of a mild fever or pain. The use of acetaminophen during the trial will be followed in the 10% home visit subset. A summary of the procedures performed at each of these visits is presented in Table 2. Intervals between study visits during the vaccination phase of the trial are provided in Table 4.



**Table 4 Intervals Between Study Visits**

## A. Yearly Visit Schedule

| Interval            | Length of interval (days) |
|---------------------|---------------------------|
| 1 (Month 0→Month 1) | 21 to 62                  |
| 2 (Month 0→Month 6) | 161 to 216                |

## B. Six-Monthly Visit Schedule

| Interval***         | Length of interval (days) |
|---------------------|---------------------------|
| 1 (Month 0→Month 1) | 21 to 62                  |
| 2 (Month 0→Month 6) | 161 to 216                |

\* This interval applies only to the first 600 women enrolled, i.e., the women in the immunogenicity subset.

\*\*Date of the Month 6 visit serves as the reference date.

\*\*\*This schedule is to be followed by women detected as having evidence of LSIL (regardless of HPV testing results) or ASC-US concomitant with detection of an oncogenic HPV type.

N.B. Except for Month 7 where the date of the Month 6 visit serves as the reference date, the date of the first vaccination serves as the reference date for intervals between study visits. **Also, for Intervals 1 and 2, the length of the interval listed represents the desired interval. Broader, allowable intervals are defined in Table 2. (Amended: 31 Oct 2005)**

**3.13.2. Secondary Endpoints**

In addition to histopathologically confirmed CIN2+ and HPV16 and HPV18 infection, which are described above, other endpoints required to achieve the six secondary objectives of our trial are discussed below.

To evaluate the safety of our vaccine (Secondary Objective #1), we plan to examine:

1. Occurrence and intensity of solicited local adverse events and occurrence (either onset or aggravation) of solicited general adverse events including urticaria within ~~30~~ **60 (Amended: 31 Oct 2005)** minutes after each vaccination and over all vaccinations combined.

**3.14. Adverse Events Monitoring**

- **AEs occurring in the week following vaccination.** ...The information collected during this visit is summarized on the Home Visit Reactogenicity Monitoring and ~~AER~~ **Adverse Event Report (Amended: 31 Oct 2005)** forms that are provided separately from this protocol.
- **AEs occurring immediately following vaccination.** We will observe all vaccinees for at least ~~30~~ **60 (Amended: 31 Oct 2005)** minutes at the clinic following each vaccination with appropriate medical treatment readily available in case of a rare anaphylactic reaction. This will be performed under the supervision of trained medical staff. During this ~~30~~ **60 (Amended: 31 Oct 2005)** minute observation period, we will collect information on vaccine reactogenicity, including both solicited and unsolicited events, as summarized on the Vaccine Administration and Reactogenicity Monitoring (VAR) and ~~Adverse Event Report (AER)~~ **(Amended: 31 Oct 2005)** forms that are provided separately from this protocol.

**9. PROJECTED Timetable**

|                                                                               |                                    |
|-------------------------------------------------------------------------------|------------------------------------|
| Review of Protocol by External Advisory Group                                 | Mar '03                            |
| Submission of Concept Protocol to the FDA                                     | June '03                           |
| NCI Human Subjects Annual Review                                              | Jul '03                            |
| Costa Rican Human Subjects Annual Review                                      | Aug '03                            |
| Submission of CMC & Full Study Protocol to FDA                                | Jan '04                            |
| First Batch of Vaccine Doses for Study Delivered to Costa Rica                | Apr '04                            |
| Training                                                                      | May '04                            |
| Initiation of Main Trial ( <i>Amended: 29 Mar 2005</i> )                      | June 28, '04                       |
| Enrollment of Participants ( <i>Amended: 29 Mar 2005; 31 Oct 2005</i> )       | June '04 – <del>Oct</del> Dec '05  |
| Vaccination of Participants ( <i>Amended: 31 Oct 2005</i> )                   | June '04 – <del>Apr</del> June '06 |
| Active Follow-up of Participants ( <i>Amended: 29 Mar 2005; 31 Oct 2005</i> ) | June '04 – <del>Oct</del> Dec '09  |
| Study Close-out ( <i>Amended: 29 Mar 2005; 31 Oct 2005</i> )                  | Nov '09 – <del>Feb</del> Apr '10   |

**Appendix D CRITERIA FOR DEFINING ADVERSE EVENTS (AEs), SERIOUS AEs (SAEs), AND PROCEDURES FOR AND TIMING OF AE REPORTING**

5. Time period, frequency, and method of detecting adverse events and serious adverse events

The AER and any other relevant forms (e.g., VAR, HV2) (*Amended: 29 Mar 2005*) will be completed for every report that meets the definition of an adverse event. The investigator will attempt detection of AEs and SAEs in the following ways: For all subjects the investigator will monitor and record the occurrence of reactions in the first ~~30~~**60** (*Amended: 31 Oct 2005*) minutes following administration of the vaccine at every vaccination visit (baseline [0 month], 1 month and 6 months) using the Vaccine Administration and Reactogenicity Monitoring (VAR) form. ...

When an AE/SAE occurs, it is the responsibility of the investigator to review all documentation (e.g., hospital progress notes, laboratory, and diagnostics reports) relative to the event. The investigator will then record all relevant information regarding an AE/SAE on the AER form. There may be instances when the NCI Medical Monitor will request additional abstraction of information from the participant's medical records. GlaxoSmithKline (GSK) Biologicals, hereafter referred to as the IND holder, may also request additional information, but will do so via the **NCI Medical Monitor or NCI Project Officer** (*Amended: 31 Oct 2005*) ~~Westat Regulatory Associate~~. In these instances, all subject identifiers will be removed by the investigator prior to document transmission. ...

## 5.1 Solicited adverse events

For all subjects the investigator will monitor and record the occurrence of reactions in the first ~~30-60~~ (*Amended: 31 Oct 2005*) minutes following administration of the vaccine at every vaccination visit (baseline [0 month], 1 month and 6 months) using the VAR form.

### 5.1.2.1 Thirty Sixty-minute (*Amended: 31 Oct 2005*) post-vaccination monitoring

Pre-vaccination oral temperature and ~~30~~ 60-minute (*Amended: 31 Oct 2005*) post-vaccination oral temperature are recorded on the VAR form. ...

## 7. Follow-up of adverse events and serious adverse events and assessment of outcome

Clinically significant laboratory abnormalities will be followed up until they have returned to baseline, or a satisfactory explanation has been provided. Reports relative to the subsequent course of an SAE noted for any subject must be submitted to the Westat Regulatory Associate.

The NCI Medical Monitor or IND holder, via the *NCI Medical Monitor or NCI Project Officer (Amended: 31 Oct 2005)* ~~Westat Regulatory Associate~~, may request that the investigator obtain additional information from the participant's clinical records to elucidate as fully as possible the nature and/or causality of the AE or SAE. The investigator is obliged to assist. If a subject dies during participation in the study or during a recognized follow-up period, the investigator will obtain copies of any available post-mortem findings, including histopathology, and will forward them to Westat's Regulatory Associate for appropriate distribution.

Updated information will be recorded on new AER forms linked to the original form with an AE number provided by the study data management system. The updated SAE report form should be resent to the Westat Regulatory Associate within 24 hours of receipt of the follow-up information as outlined in Section 8.

Back-up Westat Regulatory Associate for Reporting SAEs  
Meredith Melick (*Amended: 31 Oct 2005*) Leslie Dondey-Nouvel, MD, Safety Manager  
Westat, Inc.  
1650 Research Blvd., WB 352  
Rockville, MD 20850  
Tel: 240-453-2688 (*Amended: 31 Oct 2005*) 301-294-4445 (direct)  
Urgent Phone: 240-453-5661  
Fax: 240-314-2547  
Email: meredithmelick (*Amended: 31 Oct 2005*) lesliedondey-nouvel@westat.com

**Amendment 3: 19 May 2006**

|                                                                                                                            |                                                                                                                                                                                                                                                                                                                                                                                                                                      |
|----------------------------------------------------------------------------------------------------------------------------|--------------------------------------------------------------------------------------------------------------------------------------------------------------------------------------------------------------------------------------------------------------------------------------------------------------------------------------------------------------------------------------------------------------------------------------|
| <p><b>GlaxoSmithKline Biologicals</b></p> <p>Clinical Research &amp; Development</p> <p><b>Amendment Approval Form</b></p> |                                                                                                                                                                                                                                                                                                                                                                                                                                      |
| <b>CPMS number</b>                                                                                                         | NCI Protocol: 04-C-N191<br>GSK Biologicals Protocol: 580299/009 (HPV-009)                                                                                                                                                                                                                                                                                                                                                            |
| <b>Protocol title:</b>                                                                                                     | A double blind, controlled, randomized, phase III study of the efficacy of an HPV16/18 VLP vaccine in the prevention of advanced cervical intraepithelial neoplasia (CIN2, CIN3, adenocarcinoma <i>in situ</i> [AIS] and invasive cervical cancer) associated with HPV16 or HPV18 cervical infection in healthy young adult women in Costa Rica                                                                                      |
| <b>Amendment no.</b>                                                                                                       | 3                                                                                                                                                                                                                                                                                                                                                                                                                                    |
| <b>Amendment date:</b>                                                                                                     | 19 May 2006                                                                                                                                                                                                                                                                                                                                                                                                                          |
| <b>Coordinating author:</b>                                                                                                | Diane C Sullivan, RN (Manager, Pediatric Vaccines)                                                                                                                                                                                                                                                                                                                                                                                   |
| <b>Rationale/background for changes:</b>                                                                                   | <p>The primary reasons for this amendment is:</p> <ul style="list-style-type: none"> <li>To clarify the subset of 600 study subjects in this trial who will be included in the immunogenicity subcohort.</li> </ul> <p>Details of the revision and identification of the affected protocol sections are provided below. <b>Amended text has been included in bold, italic text and deleted text is shown with strikethrough.</b></p> |

**Synopsis**

**Objectives (continued)** 6. To evaluate the vaccine immunogenicity (by ELISA and V5/J4 monoclonal antibody inhibition enzyme immunoassay [EIA]) in ~~the first~~ ***a subset of (Amended: 19 May 2006)*** 600 subjects enrolled.

**Study Design (continued)** **Immunogenicity subcohort:** ~~The first~~ ***A subcohort of (Amended: 19 May 2006)*** 600 subjects enrolled, regardless of the study site at which they are enrolled, will have blood samples taken at Months 0, 6, 7, 12, 24, 36 and 48 for immunogenicity assessments. The immunogenicity subcohort will be comprised of these 600 subjects.

Note: All ***other (Amended: 19 May 2006)*** subjects enrolled ~~after the first 600~~ subjects will have blood drawn at Months 0, 6, 12, 24, 36, and 48 (and at Months 18, 30, and 42 if seen at those time intervals) to allow exploratory analyses and ancillary studies by NCI.

**Endpoints** HPV16 and HPV18 ELISA and V5/J4 monoclonal antibody inhibition EIA titers in the ~~first~~ 600 subjects enrolled ***into the immunogenicity subcohort. (Amended: 19 May 2006)***

## 2.2 Secondary Objectives

6. Evaluate the vaccine immunogenicity (by ELISA and V5/J4 monoclonal antibody inhibition EIA) in ~~the first~~ *a subset of (Amended: 19 May 2006)* 600 subjects enrolled (immunogenicity subcohort).

**CONFIDENTIAL**

NCI Protocol # 04-C-N191; GSK Protocol # 580299/009 (HPV-009)

Amendment 5

**Table 7**      **Timeline of Costa Rican HPV16/18 VLP Vaccine Trial Activities (Amended: 19 May 2006)**

| Timing of Home Visit/Office Visit/Contact                               | Invitation | Vaccination and AE monitoring |         |          |           | Follow-up |             |           |             |           |             |           |      |
|-------------------------------------------------------------------------|------------|-------------------------------|---------|----------|-----------|-----------|-------------|-----------|-------------|-----------|-------------|-----------|------|
|                                                                         |            | 0 month                       | 1 month | 6 months | 7 months* | 12 months | 18 months** | 24 months | 30 months** | 36 months | 42 months** | 48 months |      |
| <b>For cryopreservation (40 mL)</b>                                     |            | ●***                          |         | ●***     | ●***      | ●***      | ●***        | ●***      | ●***        | ●***      | ●***        | ●***      | ●*** |
| Monitoring for solicited & unsolicited symptoms 60 min post-vaccination |            | ●                             | ●       | ●        |           |           |             |           |             |           |             |           |      |

\*7 month visit applies only to the first 600 women enrolled *in the immunogenicity subcohort. (Amended: 19 May 2006)*

\*\*Visit is only required if indicated by the case management algorithm. The protocol-specified clinical management algorithm is summarized in Appendix A.

Fup = follow-up; Pre = pre-vaccination; PV = post-vaccination. ● is used to indicate a study procedure that requires documentation in the individual CRF.

Note: The double-line borders following Months 0, 1 and 6 indicate that a home visit by a specially-trained outreach worker to monitor AEs will occur during the week following vaccination (any day from Day 3 to Day 6) in a random subset of 10% of the women.

\*\*\*This blood draw will be performed on a subset of women, and at selected study visits, as follows: A) A random sample of women at 0, 12, and 36 months; B) All women referred to accelerated screening visits per management algorithm, at yearly intervals; C) All women referred for colposcopic evaluation who require a biopsy or LEEP, at the time of the colposcopy visit; **D) women enrolled in the immunogenicity subcohort after March 1, 2006. (Amended: 19 May 2006)**

†Procedure will not be performed on virginal women.

††Pelvic examination will be performed if indicated by the case management algorithm. The protocol-specified clinical management algorithm is summarized in Appendix A.

¶Reflex HCII HPV testing will be performed automatically for all subjects with results of ASC. HCII HPV testing will also be performed on all women who have a pelvic examination at the 0 month visit.

§HCII testing for *Chlamydia trachomatis* and *Neisseria gonorrhoeae* will be performed on samples obtained at the 0 month visit (or the first visit with a pelvic examination for women who are virginal at entry) only.

^ HPV testing by HCII will be performed on all specimens obtained at the 48 month visit.

### 3.11. Clinic Visits During Vaccination Phase (0, 1, 6, & 7 months)

To permit characterization of maximal antibody titers achieved after all three doses of vaccine are administered, a blood draw is also planned a minimum of 30 days after the third vaccination (7 month visit) on a subset of ~~the initial~~ (*Amended: 19 May 2006*) 600 women randomly assigned to one of the two arms of our trial.

**Table 4 Intervals Between Study Visits**

#### C. Yearly Visit Schedule

| Interval             | Length of interval (days) |
|----------------------|---------------------------|
| 1 (Month 0→Month 1)  | 21 to 62                  |
| 2 (Month 0→Month 6)  | 161 to 216                |
| 3 (Month 6→Month 7)* | 30 to 60**                |
| 4 (Month 0→Month 12) | 301 to 660                |
| 5 (Month 0→Month 24) | 661 to 1020               |
| 6 (Month 0→Month 36) | 1021 to 1380              |
| 7 (Month 0→Month 48) | 1381 to 1530              |

#### D. Six-Monthly Visit Schedule

| Interval***           | Length of interval (days) |
|-----------------------|---------------------------|
| 1 (Month 0→Month 1)   | 21 to 62                  |
| 2 (Month 0→Month 6)   | 161 to 216                |
| 3 (Month 6→Month 7)*  | 30 to 60**                |
| 4 (Month 0→Month 12)  | 301 to 480                |
| 5 (Month 0→Month 18)  | 481 to 660                |
| 6 (Month 0→Month 24)  | 661 to 840                |
| 7 (Month 0→Month 30)  | 841 to 1020               |
| 8 (Month 0→Month 36)  | 1021 to 1200              |
| 9 (Month 0→Month 42)  | 1201 to 1380              |
| 10 (Month 0→Month 48) | 1381 to 1530              |

\* This interval applies only to the 600 women enrolled *in the immunogenicity subcohort (Amended: 19 May 2006)*, i.e., the women in the immunogenicity subset.

### 3.12. Active Follow-up of Participants (Months 12-48)

- A blood specimen will be collected for HPV antibody and other testing. On *an approximately (Amended: 19 May 2006)* 10% subset of women at enrollment and at the 7 (*Amended: 19 May 2006*), 12 and 36 month visits, additional blood for ancillary studies will be collected to permit cryopreservation of lymphocytes for immunological assessment.

#### 3.1.3.2 Secondary Endpoints

Finally, to confirm that immunogenicity in our population is comparable to that seen in previous Phase I/II trials and to define long-term immunogenicity of the candidate vaccine (Secondary Objective #6), we plan to measure HPV16 and HPV18 antibody levels by ELISA and V5/J4 monoclonal antibody inhibition EIA on blood specimens

**CONFIDENTIAL**

NCI Protocol # 04-C-N191; GSK Protocol # 580299/009 (HPV-009)  
Amendment 5

collected from the 600 women recruited into *the immunogenicity subcohort of (Amended: 19 May 2006)* our trial. Details of the serology testing plan are provided in Section 3.19 (Laboratory Tests)

### **3.15.1 Overview**

All participants are expected to have at least seven visits over the course of our trial (see also Table 2). This will include:

- A clinic visit will be conducted at seven months on a subset of ~~the initial~~ *(Amended: 19 May 2006)* 600 women enrolled to allow for immunogenicity assessment a minimum of 30 days following the last vaccination.

### **3.17 Blood Collection**

Three types of blood draws are planned... This third blood draw will be collected for ancillary research purposes on a subset of participants, including a random sample of 10% of participants at enrollment and at their 12 and 36 month visits (to document the distribution of the immune responses in our population before and after vaccination), women referred to accelerated screening visits at six-month intervals (this group would have the additional blood sample collected annually), women who are referred for colposcopic evaluation and require a biopsy or LEEP, *and women enrolled in the immunogenicity subcohort of our trial after March 1, 2006. (Amended: 19 May 2006)* While the primary focus of this larger blood draw will be on the cryopreservation of PBMCs for immunological monitoring, residual plasma will also be saved for use in possible future assays.

### **3.19.7 Serology Testing by ELISA**

Serological assays for HPV16/18 by ELISA will be performed at GSK Biologicals laboratories, Rixensart, Belgium or in a laboratory sponsored by the NCI in Costa Rica, pending validation. Baseline ELISA anti-HPV16 and anti-HPV18 testing will be performed on all women enrolled. In addition, anti-HPV16 and anti-HPV18 ELISA will be performed on all blood samples (Month 0 through Month 48) collected from the 600 women enrolled into the *immunogenicity subcohort within the (Amended: 19 May 2006)* trial. Women in this immunogenicity subcohort will have an extra clinic visit performed a minimum of 30 days following the last vaccination (Month 7 visit) to permit immunological assessment after all three vaccine doses are administered.



**Amendment 4: 13 November 2008**

|                                                                                                                                                                                                                                                                                                                                                                                                                                                                                                                                                                                                                                                                                                                                                                                                                                                                            |                                                                                                                                                                                                                                                                                                                                                 |
|----------------------------------------------------------------------------------------------------------------------------------------------------------------------------------------------------------------------------------------------------------------------------------------------------------------------------------------------------------------------------------------------------------------------------------------------------------------------------------------------------------------------------------------------------------------------------------------------------------------------------------------------------------------------------------------------------------------------------------------------------------------------------------------------------------------------------------------------------------------------------|-------------------------------------------------------------------------------------------------------------------------------------------------------------------------------------------------------------------------------------------------------------------------------------------------------------------------------------------------|
| <b><i>GlaxoSmithKline Biologicals</i></b>                                                                                                                                                                                                                                                                                                                                                                                                                                                                                                                                                                                                                                                                                                                                                                                                                                  |                                                                                                                                                                                                                                                                                                                                                 |
| Clinical Research & Development                                                                                                                                                                                                                                                                                                                                                                                                                                                                                                                                                                                                                                                                                                                                                                                                                                            |                                                                                                                                                                                                                                                                                                                                                 |
| <b>Amendment Approval Form</b>                                                                                                                                                                                                                                                                                                                                                                                                                                                                                                                                                                                                                                                                                                                                                                                                                                             |                                                                                                                                                                                                                                                                                                                                                 |
| <b>CPMS number</b>                                                                                                                                                                                                                                                                                                                                                                                                                                                                                                                                                                                                                                                                                                                                                                                                                                                         | NCI Protocol: 04-C-N191<br>GSK Biologicals Protocol: 580299/009 (HPV-009)                                                                                                                                                                                                                                                                       |
| <b>Protocol title:</b>                                                                                                                                                                                                                                                                                                                                                                                                                                                                                                                                                                                                                                                                                                                                                                                                                                                     | A double blind, controlled, randomized, phase III study of the efficacy of an HPV16/18 VLP vaccine in the prevention of advanced cervical intraepithelial neoplasia (CIN2, CIN3, adenocarcinoma <i>in situ</i> [AIS] and invasive cervical cancer) associated with HPV16 or HPV18 cervical infection in healthy young adult women in Costa Rica |
| <b>Amendment no.</b>                                                                                                                                                                                                                                                                                                                                                                                                                                                                                                                                                                                                                                                                                                                                                                                                                                                       | 4                                                                                                                                                                                                                                                                                                                                               |
| <b>Amendment date:</b>                                                                                                                                                                                                                                                                                                                                                                                                                                                                                                                                                                                                                                                                                                                                                                                                                                                     | 13 November 2008                                                                                                                                                                                                                                                                                                                                |
| <b>Coordinating author:</b>                                                                                                                                                                                                                                                                                                                                                                                                                                                                                                                                                                                                                                                                                                                                                                                                                                                | Shamita Gupta                                                                                                                                                                                                                                                                                                                                   |
| <b>Rationale/background for changes:</b> The primary reasons for this amendment are:                                                                                                                                                                                                                                                                                                                                                                                                                                                                                                                                                                                                                                                                                                                                                                                       |                                                                                                                                                                                                                                                                                                                                                 |
| To update the Protocol to reflect the actual enrollment figure of 7,466 subjects as well as revision of statistical assumptions.                                                                                                                                                                                                                                                                                                                                                                                                                                                                                                                                                                                                                                                                                                                                           |                                                                                                                                                                                                                                                                                                                                                 |
| To clarify procedures at the final visit (Month 48 visit). Given the rapid changes occurring in clinical management of cervical abnormalities, we stated in the original protocol for our trial that the colposcopy referral algorithm used for the final screening visit under this protocol (Month 48) would be reviewed and updated, as needed, prior to implementation of the 48-month visit. We have updated the protocol to reflect that the same criteria used to define women who require colposcopy evaluation used throughout the trial will be applied at the Month 48 visit. Any additional care deemed necessary by the local clinicians will be conducted after participant close-out under a separate protocol.                                                                                                                                             |                                                                                                                                                                                                                                                                                                                                                 |
| To include the collection of extra-cervical specimens for HPV testing (oral, anal, vulvar) at the Month 48 visit, and to include its evaluation as a tertiary objective.                                                                                                                                                                                                                                                                                                                                                                                                                                                                                                                                                                                                                                                                                                   |                                                                                                                                                                                                                                                                                                                                                 |
| To revise the cytology QC process at the Month 48 visit. We propose to add slides interpreted as negative in Costa Rica with evidence of reactive changes and that are concurrently HPV positive by HCII to the set of slides selected for 100% review in the United States. This increase in the proportion selected for review is being proposed because in an evaluation of the enrollment (pre-vaccination) cytology QC effort we observed that up to 3% (3 out of 114) of slides with reactive changes that are HPV positive might have histologically evident CIN2+. Conversely, we propose to continue to review at the previous 10% level (i.e., not to increase to 100% review) those slides that are classified in Costa Rica as either negative or negative with evidence of reactive changes without concurrent evidence of HPV positivity by HCII because our |                                                                                                                                                                                                                                                                                                                                                 |

**CONFIDENTIAL**

NCI Protocol # 04-C-N191; GSK Protocol # 580299/009 (HPV-009)

Amendment 5

evaluation of the enrollment (pre-vaccination) cytology QC effort revealed that 0% (0 of 397) of slides in these two categories were found to have histologically evident CIN2+.

To modify the date range for the Month 48 visit window. The Month 48 window has been modified to be consistent with the length of the other routine visit windows, 360 days, from day 1381-1740. Since the 48-month visit is the last routine study visit, allowances are also made to allow women who cannot otherwise be seen within the pre-defined window.

To clarify the procedures for reporting adverse events in offspring of participants (Section 3.14- Adverse Event Monitoring).

To implement administrative changes including (1) update of sponsor signatory and laboratory name (2) clarification stating that background information in the protocol is reflective of knowledge at study start (3) removing mention of specific names of NCI pathologists responsible for histology review (4) updates to Appendix D including correction of typographical errors in the pregnancy and adverse event reporting sections.

Other minor revisions and corrections have been made and are noted throughout the protocol in ***bold, italic*** text.

Details of the revision and identification of the affected protocol sections are provided below. **Amended text has been included in *bold, italic* text and deleted text is shown with strikethrough.**

**GSK Sponsor Signatory: (Amended: 13 Nov 2008)**

***Dominique Descamps***

***Director, Clinical Development***

***HPV vaccines, GlaxoSmithKline Biologicals***

~~Gary Dubin, MD, Vice President, Worldwide Clinical Development, HPV Vaccines  
(Amended: 29 Mar 2005)~~

~~2301 Renaissance Blvd~~

~~King of Prussia, PA 19406, USA~~

~~Tel: 610-787-3104~~

~~Fax: 610-787-7057~~

~~Email: Gary.O.Dubin@gsk.com~~

**Synopsis**

**Study Design**

**Enrollment: *Randomization of 7,500 women will provide a sufficient study size to evaluate the main trial objectives.*** (Amended: 13 Nov 2008)

**Management of women with abnormal cytology:** Women detected as having evidence of a low-grade squamous intraepithelial lesion (LSIL) (regardless of HPV testing results) or atypical squamous cells of undetermined significance (ASC-US) concomitant with detection of an oncogenic HPV type by Hybrid

**CONFIDENTIAL**

NCI Protocol # 04-C-N191; GSK Protocol # 580299/009 (HPV-009)

Amendment 5

Capture II (HCII) will have cytology performed at 6 monthly intervals (rather than yearly intervals). Those whose ASC-US/oncogenic HPV positive lesion or LSIL persists for 2 evaluations (whether consecutive or intermittent) will be referred for colposcopy for evaluation and excisional treatment, if warranted. Those with 3 consecutive normal cytology evaluations will return to an annual cytology evaluation schedule. For purposes of this management strategy, women with ASC-US whose concomitant specimen tests negative for HPV will be considered normal and followed at annual intervals.

Women detected as having evidence of a high-grade squamous intraepithelial lesion (HSIL), atypical glandular cells (endocervical, endometrial, or glandular; favor neoplastic or not otherwise specified) (AGC), atypical squamous cells, cannot exclude HSIL (ASC-H), or cancer will be immediately referred for colposcopic evaluation and excisional treatment, if warranted.

*At the Month 48 visit we will apply the same criteria applied throughout the trial to define women who require colposcopic evaluation. Specifically, all women with evidence of cancer, HSIL, glandular lesions, ASC-H, or persistent ASC-US+/LSIL will be referred to colposcopy. Close-out of individual study participants will only occur after colposcopy referral, for women who require such referral.*

*It should be noted, that after participant close-out, participants will be offered additional clinical care if needed. Case management after study close-out will be defined under a separate protocol. (Amended: 13 Nov 2008)*

~~In addition to the management described above, exit colposcopy will be performed following the Month 48 visit in all women who, at that time are found to have atypical squamous cells (includes ASC-H and ASC-US) (ASC), LSIL, or more severe disease; women with normal cytology at the Month 48 visit who have cytologically evident abnormalities (ASC or LSIL) detected in the 12 months preceding the Month 48 visit; and a random subset of 400 women selected from among the remaining women with normal cytology at Month 48.~~

~~Note: Given that clinical management options are rapidly evolving, this preliminary exit strategy will be reviewed with the Data and Safety Monitoring Board (DSMB) prior to its implementation. Should the final exit strategy differ from that described here, a protocol amendment will be implemented detailing the exit visit strategy and its rationale.~~

**Duration of the study: Total enrollment was 7,466, which is lower than initial estimates. The final accrual of 7,466 provides 91% power to detect a vaccine efficacy of 80% for the outcome of CIN2+. (Amended: 13 Nov 2008)**

~~Assuming 15,000 women enroll, it is expected that a total of approximately 50 HPV16/18+ CIN2+ events will occur across both trial arms over the course of the trial under the null hypothesis and that 30 events will occur across both trial arms over the course of the trial in the event that the vaccine is 80% effective.~~

## **1.1 Background**

~~This experience is summarized in the GSK Investigator Brochure. The information in this section reflects knowledge that was current at the time of study start. Please refer to the most recent edition of the Investigator Brochure for a review of clinical and pre-clinical studies (Amended: 13 Nov 2008).~~

## **2.3 Tertiary Objectives**

**5. An evaluation of vaccine efficacy of the candidate vaccine against HPV infections that occur at extra-cervical sites. (Amended: 13 Nov 2008)**

### **3.1. Overview of the Trial**

Approximately 20,000 women will be invited to participate in a double blinded, randomized clinical trial to evaluate whether vaccination with the bivalent HPV16/18 VLP-based vaccine manufactured by GSK Biologicals protects against the development

**CONFIDENTIAL**

NCI Protocol # 04-C-N191; GSK Protocol # 580299/009 (HPV-009)  
Amendment 5

of histopathologically confirmed, incident CIN2+. Women between 18-25 years of age at entry who are residents of Guanacaste Province or surrounding areas will be eligible. Participants will be required to not be pregnant at the time of vaccination, to agree to use an effective birth control method 30 days before vaccination until 60 days after the last vaccination (approximately 9 months total), and to be in good health as determined by an overall physical examination administered by a study physician at entry into the trial. Women will be identified through a census of the region performed in February/July 2000, and will be invited to participate in the trial by visiting one of the study clinics set up specifically for this trial. ***While randomization (into HPV or HAV vaccination) of 15,000 women was initially anticipated, randomization of 7,500 women will provide a sufficient study size to evaluate the main trial objectives based on revised statistical assumptions, see Section 4.7. (Amended: 13 Nov 2008)*** ~~12,000-15,000 women are expected to be eligible and agree to be randomly assigned to one of two study arms: VLP vaccination or vaccination with a control vaccine (HAV).~~

**Table 1 Expected Trial Sample Size (Amended: 13 Nov 2008)**

|                                                                                                                                               |                                            |
|-----------------------------------------------------------------------------------------------------------------------------------------------|--------------------------------------------|
| Number of women (from census) invited to participate                                                                                          | 19,000 – 21,000                            |
| Number of eligible women who agree to be randomly assigned to one of two study arms                                                           | <b>7,500</b><br><del>12,000 – 15,000</del> |
| Number of women who will be randomly assigned to one of two study arms, will receive 3 doses of vaccine and will be evaluable in ATP analysis | <b>5,300</b><br><del>10,400 – 13,000</del> |
| <b><i>Estimated</i></b> Number of women who complete four years of follow-up                                                                  | <b>6,375</b><br><del>9,400 – 11,800</del>  |

**CONFIDENTIAL**

NCI Protocol # 04-C-N191; GSK Protocol # 580299/009 (HPV-009)

Amendment 5

**Table 2 Timeline of Costa Rican HPV16/18 VLP Vaccine Trial Activities (Amended: 13 Nov 2008)**

|                                                                                                   | Invitation | Vaccination and AE monitoring |                           |                            | Follow-up                          |               |             |               |                |                 |                 |                                 |
|---------------------------------------------------------------------------------------------------|------------|-------------------------------|---------------------------|----------------------------|------------------------------------|---------------|-------------|---------------|----------------|-----------------|-----------------|---------------------------------|
|                                                                                                   |            | 0 month                       | 1 month                   | 6 months                   | 7 months*                          | 12 months     | 18 months** | 24 months     | 30 months**    | 36 months       | 42 months**     | 48 months                       |
| Timing of Home Visit/Office Visit/Contact                                                         | -1 month   | 0 month                       | 1 month                   | 6 months                   | 7 months*                          | 12 months     | 18 months** | 24 months     | 30 months**    | 36 months       | 42 months**     | 48 months                       |
| Desired & [Maximum Allowable] Range in Days relative to Month 0 Visit                             | -30 to -3  | 0                             | 21 to 62<br>[21 to 120]   | 161 to 216<br>[121 to 300] | 30 to 60<br>after 6<br>month visit | 301 to<br>480 | 481 to 660  | 661 to<br>840 | 841 to<br>1020 | 1021 to<br>1200 | 1201 to<br>1380 | 1381 to<br>1530<br><b>1740#</b> |
| Type of Visit/Contact                                                                             | Invitation | Enrolment &<br>Vaccine #1     | One Month &<br>Vaccine #2 | Six Month &<br>Vaccine #3  | Immuno-<br>genicity<br>Subset      | 1st Fup       | Interim Fup | 2nd Fup       | Interim Fup    | 3rd Fup         | Interim Fup     | 4th Fup                         |
| Sampling timepoint                                                                                |            | Pre                           | PV I                      | PV II                      | PV III                             | PV III        | PV III      | PV III        | PV III         | PV III          | PV III          | PV III                          |
| Contact potential subjects by mail                                                                | •          |                               |                           |                            |                                    |               |             |               |                |                 |                 |                                 |
| Visit potential subjects at their homes and provide them with a copy of the informed consent form | •          |                               |                           |                            |                                    |               |             |               |                |                 |                 |                                 |
| Informed consent                                                                                  |            | •                             |                           |                            |                                    |               |             |               |                |                 |                 |                                 |
| Check eligibility/inclusion criteria                                                              |            | •                             |                           |                            |                                    |               |             |               |                |                 |                 |                                 |
| Check exclusion criteria                                                                          |            | •                             |                           |                            |                                    |               |             |               |                |                 |                 |                                 |
| Check vaccination deferral criteria                                                               |            | •                             | •                         | •                          |                                    |               |             |               |                |                 |                 |                                 |
| Check elimination criteria                                                                        |            | •                             | •                         | •                          | •                                  | •             | •           | •             | •              | •               | •               | •                               |
| Check contraindications                                                                           |            | •                             | •                         | •                          |                                    |               |             |               |                |                 |                 |                                 |
| Interview (Questionnaire)                                                                         |            | •                             | •                         | •                          |                                    | •             | •           | •             | •              | •               | •               | •                               |
| Complete medical history                                                                          |            | •                             |                           |                            |                                    |               |             |               |                |                 |                 |                                 |
| Interim medical history                                                                           |            |                               | •                         | •                          | •                                  | •             | •           | •             | •              | •               | •               | •                               |
| Physical examination                                                                              |            | •                             |                           |                            |                                    |               |             |               |                |                 |                 |                                 |
| Pre-vaccination body temperature                                                                  |            | •                             | •                         | •                          |                                    |               |             |               |                |                 |                 |                                 |
| Urine sampling for urine pregnancy test (50 mL)                                                   |            | •                             | •                         | •                          |                                    |               |             |               |                |                 |                 |                                 |
| Randomization                                                                                     |            | •                             |                           |                            |                                    |               |             |               |                |                 |                 |                                 |

**CONFIDENTIAL**

NCI Protocol # 04-C-N191; GSK Protocol # 580299/009 (HPV-009)

Amendment 5

|                                                                                                       | Invitation | Vaccination and AE monitoring |                         |                            | Follow-up                          |            |             |            |             |              |              |                              |
|-------------------------------------------------------------------------------------------------------|------------|-------------------------------|-------------------------|----------------------------|------------------------------------|------------|-------------|------------|-------------|--------------|--------------|------------------------------|
| Timing of Home Visit/Office Visit/Contact                                                             | -1 month   | 0 month                       | 1 month                 | 6 months                   | 7 months*                          | 12 months  | 18 months** | 24 months  | 30 months** | 36 months    | 42 months**  | 48 months                    |
| Desired & [Maximum Allowable] Range in Days relative to Month 0 Visit                                 | -30 to -3  | 0                             | 21 to 62<br>[21 to 120] | 161 to 216<br>[121 to 300] | 30 to 60<br>after 6<br>month visit | 301 to 480 | 481 to 660  | 661 to 840 | 841 to 1020 | 1021 to 1200 | 1201 to 1380 | 1381 to 1530<br><b>1740#</b> |
| Type of Visit/Contact                                                                                 | Invitation | Enrolment & Vaccine #1        | One Month & Vaccine #2  | Six Month & Vaccine #3     | Immuno-genicity Subset             | 1st Fup    | Interim Fup | 2nd Fup    | Interim Fup | 3rd Fup      | Interim Fup  | 4th Fup                      |
| Sampling timepoint                                                                                    |            | Pre                           | PV I                    | PV II                      | PV III                             | PV III     | PV III      | PV III     | PV III      | PV III       | PV III       | PV III                       |
| Blood sampling                                                                                        |            |                               |                         |                            |                                    |            |             |            |             |              |              |                              |
| For antibody test/research (10 mL)                                                                    |            | •                             | •                       | •                          | •                                  | •          | •           | •          | •           | •            | •            | •                            |
| For hematocrit (3 mL)                                                                                 |            | •                             |                         |                            |                                    |            |             |            |             |              |              |                              |
| For research (10 mL)                                                                                  |            | •                             |                         |                            |                                    |            |             |            |             |              |              | •                            |
| For cryopreservation (40 mL)                                                                          |            | •***                          |                         | •***                       | •***                               | •***       | •***        | •***       | •***        | •***         | •***         | •***                         |
| Pelvic examination†                                                                                   |            | •                             |                         | •††                        |                                    | •          | •           | •          | •           | •            | •            | •                            |
| Collection of cervical secretions for research†                                                       |            | •                             |                         | •††                        |                                    | •          | •           | •          | •           | •            | •            | •                            |
| Collection of cervical sample for:<br>-cervical cytology,<br>-HPV PCR testing, and<br>-HCII testing†† |            | •§                            |                         | •††                        |                                    | •          | •††         | •          | •††         | •            | •††          | •^                           |
| Collection of subject-obtained cervical sample for HPV PCR testing†                                   |            |                               |                         | •                          |                                    |            |             |            |             |              |              |                              |
| Collection of cervical cells for research†                                                            |            | •                             |                         | •††                        |                                    | •          | •           | •          | •           | •            | •            | •                            |
| Vaccination                                                                                           |            | •                             | •                       | •                          |                                    |            |             |            |             |              |              |                              |
| Monitoring for solicited & unsolicited symptoms 60 min post-vaccination                               |            | •                             | •                       | •                          |                                    |            |             |            |             |              |              |                              |

**CONFIDENTIAL**

NCI Protocol # 04-C-N191; GSK Protocol # 580299/009 (HPV-009)

Amendment 5

|                                                                                                                                                                                                                       | Invitation | Vaccination and AE monitoring |                         |                            |                                    | Follow-up  |             |            |             |              |              |                              |  |
|-----------------------------------------------------------------------------------------------------------------------------------------------------------------------------------------------------------------------|------------|-------------------------------|-------------------------|----------------------------|------------------------------------|------------|-------------|------------|-------------|--------------|--------------|------------------------------|--|
| Timing of Home Visit/Office Visit/Contact                                                                                                                                                                             | -1 month   | 0 month                       | 1 month                 | 6 months                   | 7 months*                          | 12 months  | 18 months** | 24 months  | 30 months** | 36 months    | 42 months**  | 48 months                    |  |
| Desired & [Maximum Allowable] Range in Days relative to Month 0 Visit                                                                                                                                                 | -30 to -3  | 0                             | 21 to 62<br>[21 to 120] | 161 to 216<br>[121 to 300] | 30 to 60<br>after 6<br>month visit | 301 to 480 | 481 to 660  | 661 to 840 | 841 to 1020 | 1021 to 1200 | 1201 to 1380 | 1381 to 1530<br><b>1740#</b> |  |
| Type of Visit/Contact                                                                                                                                                                                                 | Invitation | Enrolment & Vaccine #1        | One Month & Vaccine #2  | Six Month & Vaccine #3     | Immuno-genicity Subset             | 1st Fup    | Interim Fup | 2nd Fup    | Interim Fup | 3rd Fup      | Interim Fup  | 4th Fup                      |  |
| Sampling timepoint                                                                                                                                                                                                    |            | Pre                           | PV I                    | PV II                      | PV III                             | PV III     | PV III      | PV III     | PV III      | PV III       | PV III       | PV III                       |  |
| On one day from Day 3-6 after vaccination, a specially-trained outreach worker will interview a random subset of 10% of the 15,000 subjects for follow-up regarding post-vaccination solicited & unsolicited symptoms |            | •                             | •                       | •                          |                                    |            |             |            |             |              |              |                              |  |
| Recording of AEs (nonserious and serious) occurring during the period since the last visit                                                                                                                            |            |                               | •                       | •                          | •                                  | •          | •           | •          | •           | •            | •            | •                            |  |
| Recording of any concomitant medication/vaccination taken in the 30 days prior to SAE onset that could have contributed to the SAE                                                                                    |            | •                             | •                       | •                          | •                                  | •          | •           | •          | •           | •            | •            | •                            |  |
| Recording of any concomitant medication/vaccination used to treat an SAE, that clarifies the diagnosis of the SAE or is an immunosuppressant                                                                          |            | •                             | •                       | •                          | •                                  | •          | •           | •          | •           | •            | •            | •                            |  |
| Reporting of all pregnancies and all pregnancy outcome information                                                                                                                                                    |            | •                             | •                       | •                          | •                                  | •          | •           | •          | •           | •            | •            | •                            |  |
| Study Conclusion                                                                                                                                                                                                      |            |                               |                         |                            |                                    |            |             |            |             |              |              | •                            |  |
| Collection of Oral HPV Samples                                                                                                                                                                                        |            |                               |                         |                            |                                    |            |             |            |             |              |              | •                            |  |
| Collection of Anal HPV Samples                                                                                                                                                                                        |            |                               |                         |                            |                                    |            |             |            |             |              |              | •                            |  |
| Collection of Vulvar HPV Samples                                                                                                                                                                                      |            |                               |                         |                            |                                    |            |             |            |             |              |              | •                            |  |

**CONFIDENTIAL**

NCI Protocol # 04-C-N191; GSK Protocol # 580299/009 (HPV-009)

Amendment 5

\*7 month visit applies only to the 600 women enrolled in the immunogenicity subcohort. (Amended: 19 May 2006)

\*\*Visit is only required if indicated by the case management algorithm. The protocol-specified clinical management algorithm is summarized in Appendix A.

Fup = follow-up; Pre = pre-vaccination; PV = post-vaccination. ● is used to indicate a study procedure that requires documentation in the individual CRF.

Note: The double-line borders following Months 0, 1 and 6 indicate that a home visit by a specially-trained outreach worker to monitor AEs will occur during the week following vaccination (any day from Day 3 to Day 6) in a random subset of 10% of the women.

\*\*\*This blood draw will be performed on a subset of women, and at selected study visits, as follows: A) A random sample of women at 0, 12, and 36 months; B) All women referred to accelerated screening visits per management algorithm, at yearly intervals; C) All women referred for colposcopic evaluation who require a biopsy or LEEP, at the time of the colposcopy visit; D) women enrolled in the immunogenicity subcohort after March 1, 2006. (Amended: 19 May 2006).

†Procedure will not be performed on virginal women.

††Pelvic examination will be performed if indicated by the case management algorithm. The protocol-specified clinical management algorithm is summarized in Appendix A.

¶¶Reflex HCII HPV testing will be performed automatically for all subjects with results of ASC. HCII HPV testing will also be performed on all women who have a pelvic examination at the 0 month visit.

§HCII testing for *Chlamydia trachomatis* and *Neisseria gonorrhoeae* will be performed on samples obtained at the 0 month visit (or the first visit with a pelvic examination for women who are virginal at entry) only.

^ HPV testing by HCII will be performed on all specimens obtained at the 48 month visit.

**#Every effort will be made to schedule study participants within the preferred Month 48 study visit window (1381 to 1740 days post Month 0). However, the window for the last visit might be extended until October 3, 2010, which is the scheduled date of last subject last visit (i.e., 1740 days after the 4 year anniversary date for the last subject first visit).**



### 3.6 Study Vaccines

~~To date~~ **At the time of study start**, five Phase I-IIb clinical trials ~~have been were~~ conducted ~~that and~~ have evaluated vaccine safety. (Amended: 13 Nov 2008)

Please refer to the Investigator Brochure (IB) (~~3rd edition, March 2004~~) for a review of the HPV16/18 VLP vaccine pre-clinical and clinical studies. (Amended: 13 Nov 2008)

### 3.11. Clinic Visits During Vaccination Phase (0, 1, 6, & 7 months)

**Table 4 Intervals Between Study Visits (Amended: 13 Nov 2008)**

#### A. Yearly Visit Schedule

| Interval             | Length of interval (days)            |
|----------------------|--------------------------------------|
| 1 (Month 0→Month 1)  | 21 to 62                             |
| 2 (Month 0→Month 6)  | 161 to 216                           |
| 3 (Month 6→Month 7)* | 30 to 60**                           |
| 4 (Month 0→Month 12) | 301 to 660                           |
| 5 (Month 0→Month 24) | 661 to 1020                          |
| 6 (Month 0→Month 36) | 1021 to 1380                         |
| 7 (Month 0→Month 48) | 1381 to <del>4530</del> <b>1740#</b> |

#### B. Six-Monthly Visit Schedule

| Interval***           | Length of interval (days)            |
|-----------------------|--------------------------------------|
| 1 (Month 0→Month 1)   | 21 to 62                             |
| 2 (Month 0→Month 6)   | 161 to 216                           |
| 3 (Month 6→Month 7)*  | 30 to 60**                           |
| 4 (Month 0→Month 12)  | 301 to 480                           |
| 5 (Month 0→Month 18)  | 481 to 660                           |
| 6 (Month 0→Month 24)  | 661 to 840                           |
| 7 (Month 0→Month 30)  | 841 to 1020                          |
| 8 (Month 0→Month 36)  | 1021 to 1200                         |
| 9 (Month 0→Month 42)  | 1201 to 1380                         |
| 10 (Month 0→Month 48) | 1381 to <del>4530</del> <b>1740#</b> |

\* This interval applies only to the 600 women enrolled in the immunogenicity subcohort (Amended: 19 May 2006), i.e., the women in the immunogenicity subset.

\*\*Date of the Month 6 visit serves as the reference date.

\*\*\*This schedule is to be followed by women detected as having evidence of LSIL (regardless of HPV testing results) or ASC-US concomitant with detection of an oncogenic HPV type.

N.B. Except for Month 7 where the date of the Month 6 visit serves as the reference date, the date of the first vaccination serves as the reference date for intervals between study visits. Also, for Intervals 1 and 2, the length of interval listed represents the desired interval. Broader, allowable intervals are defined in Table 2. (Amended: 31 Oct 2005)

**# Every effort will be made to schedule study participants within the preferred Month 48 study visit window (1381 to 1740 days post Month 0). However, the window for the last visit might be extended until October 3, 2010, which is the scheduled date of last subject last visit (i.e, 1740 days after the 4 year anniversary date for the last subject first visit).**

### 3.12. Active Follow-up of Participants (Months 12-48)

Women who at any of the yearly screening visits are found to have evidence of ASC-US+/LSIL will be seen at six-month intervals (rather than yearly intervals), and will continue to be seen every six months until there is evidence of disease

**CONFIDENTIAL**

NCI Protocol # 04-C-N191; GSK Protocol # 580299/009 (HPV-009)  
Amendment 5

persistence/progression (in which case they will be referred for colposcopic evaluation) or three consecutive normal cytologies are observed (in which case they will return to a yearly screening interval). Women who at any of the clinic visits are found to have evidence or suspicion of *AGC/ASC-H/HSIL/cancer* will be immediately referred for colposcopic evaluation and excisional treatment, if needed. **(Amended: 13 Nov 2008)**

**3.13.3. Tertiary and Exploratory Endpoints (Amended: 13 Nov 2008)**

**3.14 Adverse Events Monitoring**

One of the major objectives of the present trial is to obtain additional information on the AEs associated with HPV16/18 VLP vaccination. While safety and immunogenicity trials in the United States and elsewhere have suggested the overall safety of the HPV16/18 VLP-based vaccine, rare AEs cannot be ruled out in these early phase studies given the relatively limited number of volunteers involved (approximately 690 individuals vaccinated ~~to date~~ **at the time of study start** with the GSK Biologicals candidate HPV16/18 VLP-based vaccine and approximately 2,200 individuals ~~have been~~ vaccinated ~~to date~~ **at the time of study start** with other VLP-based vaccines). **(Amended: 13 Nov 2008)**

- ***Monitoring specific AEs of interest in offspring:***

***At the request of the Costa Rican IRB specific adverse events occurring in subject's offspring who were conceived within one month prior to first vaccination to one year after last vaccination will be reported at the final visit (Month 48). This includes the following medical event categories in the offspring:***

- ***Endocrinologic and metabolic conditions***
- ***Autoimmune diseases***
- ***Sensory impairment***
- ***Intellectual impairment***
- ***Death***

***The occurrence of these specific events in offspring will be included in the clinical database. A child case will be created and linked to the mother case. Medical judgment will be exercised in deciding whether any disorders/diseases reported in offspring are included in these specific categories and should be reported as appropriate. Of note congenital malformations in offspring, as per original protocol, are to be documented and reported as SAEs and included in the pregnancy outcome analysis. (Amended: 13 Nov 2008)***

All AEs reported on the AER form (Amended: 31 Oct 2005) will be followed through resolution by a staff physician. ***Non-serious AEs will be reviewed by a staff clinician before participant close-out; participants with ongoing conditions will be referred to the appropriate referral center if needed. (Amended: 13 Nov 2008)***

**3.16.3 Exiting Women from the Trial (Amended 13 Nov 2008)**

***At the Month 48 visit we will apply the same criteria applied throughout the trial to define women who require colposcopic evaluation. Specifically, all women with***

*evidence of cancer, HSIL, glandular lesions, AGC, ASC-H, or persistent ASC-US+/LSIL will be referred to colposcopy. Close-out of individual study participants will only occur after colposcopy referral, for women who require such referral. See Appendix A for more details.*

*It should be noted, that after participant close-out, participants will be offered additional clinical care if needed. Case management after study close-out will be defined under a separate protocol.*

~~Before the trial is terminated, it is important that we assure all women in the trial that they are free of disease. Therefore, at the last routine screening visit proposed as part of our trial (at 48 months), the criteria used to determine whether a woman should be referred for colposcopic evaluation will differ from that implemented during the initial years of the trial.~~

~~More specifically, in addition to referring all women with evidence of cancer, HSIL, glandular lesions, ASC H, or persistent ASC-US+/LSIL to colposcopy, we propose to refer to colposcopy women with evidence of newly diagnosed ASC/LSIL (irrespective of HPV status) and women with normal cytology at the Month 48 visit who have cytologically evident abnormalities (ASC or LSIL) detected in the 12 months preceding the Month 48 visit. A random subset of 400 women will also be referred for colposcopic evaluation to confirm the sensitivity of our clinical management algorithm for the detection of CIN2+. Given that clinical management options are rapidly changing, we further propose that this preliminary exit strategy be reviewed and discussed by the IRBs and DSMB prior to its implementation. The revised strategy will be submitted for review before the first woman recruited reaches her 48-month visit. Should the final exit strategy differ from that summarized here, an amendment will also be filed with the US FDA detailing the exit visit strategy and its rationale. This will assure that state-of-the-art knowledge is incorporated into our exit visit strategy.~~

### 3.17.1 Overview

- *Oral, anal and vulvar specimen collection at the 48-month visit is being added to allow for the evaluation of the effect of vaccination on oral, anal, and vulvar HPV infection rates. (Amended: 13 Nov 2008).*

### 3.17.4 Extra-Cervical Collection

*Oral, anal and vulvar specimen collection at the 48-month visit is being added to allow for the evaluation of the effect of vaccination on oral, anal, and vulvar HPV infection rates. Prior to the pelvic exam, an oral specimen will be collected. During the pelvic examination, a vulvar and an anal specimen will be collected prior to cervical sampling. Each specimen will be collected according to a standard procedure and will be stored in separate tubes. (Amended: 13 Nov 2008)*

### 3.18. Biospecimen Processing, Storage, & Shipment

The individual types of specimens we propose to collect and the expected number of aliquots resultant from this collection and requiring storage/shipment are summarized in

**CONFIDENTIAL**

Table 5 to allow NCI to plan for adequate repository space at its main repository in Maryland, USA. In brief, we propose to collect cervical cells for liquid-based cytology, additional cervical cells for HPV DNA, RNA and other testing, cervical secretions for immunological assessment, cytological material (slides) for evaluation, histopathological material (blocks and slides) for review and testing, blood for various immunological and other research-based tests, *and oral, anal and vulvar samples (Amended: 13 Nov 2008)*. We have had experience collecting all of these biological specimens in Costa Rica on several thousand women over more than seven years as part of our natural history study.

Several biological specimens we propose to collect require little or no processing and can be stored at air-conditioned room temperature until shipment to the USA. These include the cells for liquid-based cytology and cytopathological materials. Other specimens require little or no processing but need to be frozen on the day of collection. These include the cervical cells for HPV DNA and RNA testing, cervical secretions, *and the oral, anal and vulvar samples (Amended: 13 Nov 2008)*.

**Table 5 Types of Biological Specimens Proposed and Expected Storage Requirements (Amended: 13 Nov 2008)**

| Specimen Type                        | # per Woman | Size              | Total #*                            |
|--------------------------------------|-------------|-------------------|-------------------------------------|
| Cervical Cells (Liquid Cytology/HPV) | 6           | 25 mL vial        | <del>90,000</del> <b>45,000</b>     |
| Cervical Cells (Research)            | 6           | 10 mL vial        | <del>90,000</del> <b>45,000</b>     |
| Cervical Secretions                  | 5           | 10 mL vial        | <del>75,000</del> <b>37,500</b>     |
| Blood                                | 70          | 1-2 mL vials      | <del>1,050,000</del> <b>525,000</b> |
| Tissue Slides (Cytology/Pathology)   | 6.25        | Slides            | <del>93,750</del> <b>46,875</b>     |
| Tissue Blocks                        | .25         | Blocks            | <del>3,750</del> <b>1,875</b>       |
| <b>Oral Samples</b>                  | <b>1-3</b>  | <b>20 mL vial</b> | <b>7,500</b>                        |
| <b>Anal Samples</b>                  | <b>1</b>    | <b>1 mL vial</b>  | <b>7,500</b>                        |
| <b>Vulvar Samples</b>                | <b>1</b>    | <b>1 mL vial</b>  | <b>7,500</b>                        |

\* Assuming ~~45,000~~ **7,500** participants (repository estimation purposes; does not take drop-outs into account)

**3.19.1 Cytology**

The clinical management of the study participants will rely on the Costa Rican cytopathology interpretation, with the exception of HSIL noted below. As part of NCI’s ongoing quality control efforts (led by cytotechnologist Claire Eklund and pathologist Martha Hutchinson who are affiliated with the Women’s and Infants’ Hospital in Providence, RI), all slides that read as abnormal in Costa Rica and a 10% sample of the slides read as negative in Costa Rica will be re-screened and re-interpreted in the United States. *In addition, all slides from the study exit visit (Month 48) will be re-screened and re-interpreted in the United States. At the study exit (Month 48), in addition to 100% of slides read as abnormal in Costa Rica and 10% of the slides read as negative in Costa Rica mentioned above, 100% of slides that are read in Costa Rica as negative with evidence of reactive changes and that are concurrently HPV positive by the HCII will be re-interpreted in the United States (Amended: 13 Nov 2008)*. The 10% set of negatives selected for evaluation in the United States will be randomly selected, without replacement. This scheme will result in approximately 50% of subjects with a negative cytology having an expert review over the course of the 4-year study follow-up period. The purpose of this review is to maximize the accuracy of the Costa Rican interpretations

and the comparability of the Costa Rican readings to a US standard, realizing nonetheless that cytopathology is inherently and unavoidably subjective to some extent and that there is no absolute reference standard of cytopathology, particularly for equivocal interpretations such as ASC-US.

### 3.19.2. Histology

In addition to the Costa Rican diagnosis, ~~an~~ NCI pathologist (~~Mark Sherman and/or Diane Solomon~~) (**Amended: 13 Nov 2008**) with expertise in cervical pathology will periodically diagnose all histological specimens, blinded to the initial Costa Rican diagnosis. If the diagnoses are concordant (concordance will be required at the level of negative or atypical metaplasia/CIN1/CIN2/CIN3 or *in situ*/cancer), that will establish the NCI provisional study diagnosis. Discrepant findings between the Costa Rican and NCI pathologist will lead to review by the second NCI pathologist. Agreement between two of the three pathologists at the <CIN2/CIN2+ level will establish the NCI study diagnosis. These diagnoses will not be available within a timeframe that would allow their use for clinical management purposes. Therefore, NCI pathology review will be performed to define histological diagnoses for analysis purposes. This review process and its results will be performed and documented in the US. A copy of the results of the US pathology review will be sent to the clinical staff in Costa Rica. Periodic review of proficiency slide sets will be performed throughout the trial to assure comparability of the Costa Rican/NCI panel consensus readings against other expert pathologists involved in HPV vaccine studies.

### 3.19.3. PCR typing of HPV DNA from *PreservCyt* specimens

(to define trial endpoints)

Two 0.5 mL aliquots of *PreservCyt* specimens will be withdrawn *prior* to *ThinPrep* preparation to avoid possible specimen-to-specimen contamination. The removal of the two small aliquots is not expected to impact on the cellular adequacy of the *PreservCyt* specimen, which typically contains many more cells than required for a *ThinPrep* and subsequent Hybrid Capture® 2 (a signal amplification assay; manufactured by Digene Corporation, Gaithersburg, MD, USA) (HCII HPV DNA test) testing.

The PCR testing used to establish the presence of HPV16 and/or HPV18 for the efficacy endpoints will be performed by GSK Biologicals or ~~Delft~~ **DDL (Amended: 13 Nov 2008)** Diagnostic Laboratories on one *PreservCyt* aliquot, as follows (see also Appendix C).

To test for HPV DNA positivity, GSK Biologicals or ~~Delft~~ **DDL (Amended: 13 Nov 2008)** Diagnostic Laboratories will use SPF<sub>10</sub> primers that amplify a 65 nucleotide region of the HPV L1 gene for most of the known HPV isolates.

### 3.20. Efforts to Maximize Participation/Retention

- We will invite 20,000 women to participate, but our power estimates (see Table 6 Section 4.7) indicate the need for ~~7,500~~ **12,000—15,000** women (**Amended: 13 Nov**

**CONFIDENTIAL**

NCI Protocol # 04-C-N191; GSK Protocol # 580299/009 (HPV-009)  
Amendment 5

2008). Only women who, in principle, agree to comply with the full protocol will be enrolled.

#### **4.7 Power to Determine Vaccine Efficacy**

*Total accrual into the Costa Rica Trial (HPV-009) was lower than initial estimates. For the outcome of histological CIN2+ (expected # events = 24), the final accrual of 7,466 provides 91% power to detect a vaccine efficacy of 80% under the following assumptions:*

- 1) cumulative incidence of histopathologically confirmed CIN2+ associated with HPV-16 or HPV-18 of 0.79% (Woodman, 2001)*
- 2) percent of non-virginal women with histologically confirmed CIN2+ at enrolment of 1.5%*
- 3) proportion of women who are sexually inexperienced at entry of 23%*
- 4) Proportion of virginal women who initiate sexual activity during follow-up of 43% (constant rate of initiation assumed during the 4-year follow-up period)*
- 5) proportion of sexually experienced women who are both HPV-16 and HPV-18 DNA positive at entry of 0.6%*
- 6) proportion of sexually experienced women who acquire HPV-16/18 during the vaccination phase of 1.5% (includes women who develop incident CIN2+ associated with HPV-16/18 infection during this period)*
- 7) proportion of women who receive 1+ vaccine doses outside the prescribed protocol window of 20%*
- 8) proportion of women who drop out during the study period of 10% (constant drop-out rate assumed during the 4-year follow-up period)*
- 9) a two-sided alpha of 0.05. (Amended: 13 Nov 2008)*

#### **Appendix A**

- Added Colposcopy Referral Algorithm - Month 48 Visit

Amended: 13 Nov 2008

**Colposcopy Referral Algorithm- Month 48 Visit**

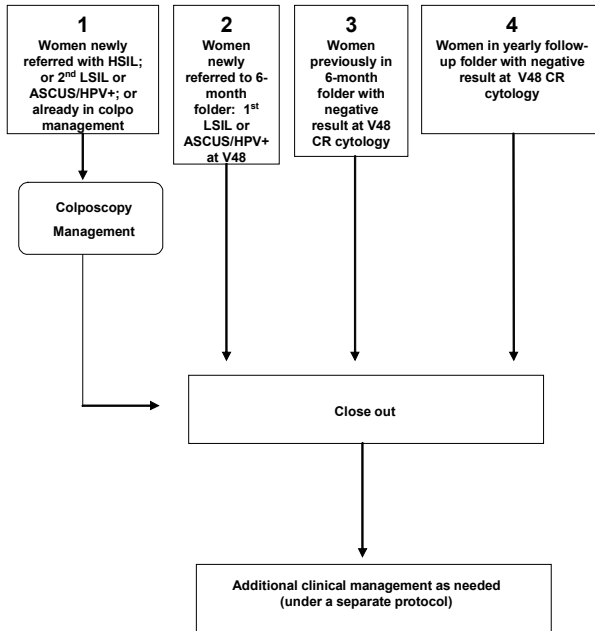

**Appendix D**

**7. Follow-up of adverse events and serious adverse events and assessment of outcome**

The updated SAE report form should be resent to the Westat Regulatory Associate within 24 hours of receipt of the follow-up information as outlined in Section 08. (Amended: 13 Nov 2008)

**8.2 Completion and transmission of serious adverse event reports to Westat**

Mujadala Abdul-Majid, Regulatory Affairs Assistant (Amended: 13 Nov 2008)  
Health Studies Area, Westat, Inc.  
1441 West Montgomery Ave., Westbrook, WB 335  
Rockville, MD 20850  
Tel: 301-738-3642 (direct)  
Urgent phone: 240-453-5661  
Fax: 240-314-2547  
Email: mujadala@westat.com

**10. Post study adverse events and serious adverse events**

A post-study AE/SAE is defined as any event that occurs outside of the AE/SAE detection period defined in Section 5. Investigators are not obligated to actively seek AEs or SAEs in former study participants. If the investigator learns of any SAE, including a

**CONFIDENTIAL**

NCI Protocol # 04-C-N191; GSK Protocol # 580299/009 (HPV-009)  
Amendment 5

death, at any time after a subject has been discharged from the study, and considers the event reasonably related to the investigational product, the investigator will **notify the sponsor**. ~~promptly notify Westat's Regulatory Associate.~~ **(Amended: 13 Nov 2008)**

## **11. Pregnancy**

The PES, **PO (Amended: 13 Nov 2008)**, PED (Amended: 29 Mar 2005) and CIF forms contain questions about pregnancies and pregnancy outcomes that have occurred since the last study visit. The principal investigator can also receive information about new pregnancies and pregnancy outcomes through other direct or indirect contacts with participants in the study (e.g., at home reminder visits). All new pregnancy and pregnancy outcome information for study participants, whether or not an SAE is involved, will be transmitted to the Westat Regulatory Associate via a read-only electronic mail report within ~~3-5~~ **business** days (i.e., no longer than-120 **business** hours) **(Amended: 13 Nov 2008)** of receipt by the principal investigator or designee. The Westat Regulatory Associate will, in turn, transmit the electronic mail to the NCI Medical Monitor and GSK Global Clinical Safety and Pharmacovigilance within one business day of receipt of the electronic mail from Costa Rica, documenting the receipt date, file name and transmittal date. While pregnancy itself is not considered an AE or SAE, all pregnancies will be followed to term.

A complication of pregnancy or delivery will be recorded as an AE or an SAE, as described in Section 1 and Section 2, and will be followed as described in Section ~~0 8~~. **(Amended: 13 Nov 2008)** A miscarriage is always considered an SAE and will be reported as outlined in Section ~~0 8~~. **(Amended: 13 Nov 2008)** Furthermore, SAEs occurring as a result of a post-study pregnancy AND which the investigator considers reasonably related in time to receipt of the investigational product, will be reported to the Westat Regulatory Associate as in Section ~~0 8~~. **(Amended: 13 Nov 2008)** While the investigator is not obligated to actively seek this information from former study participants, he/she may learn of a pregnancy through spontaneous reporting. Information on pregnancies identified during the screening phase/prior to first vaccine administration does not need to be communicated as a safety issue.



**Figure 3 Expedited Reporting – Personnel Communication Flow Chart (Amended: 13 Nov 2008)**

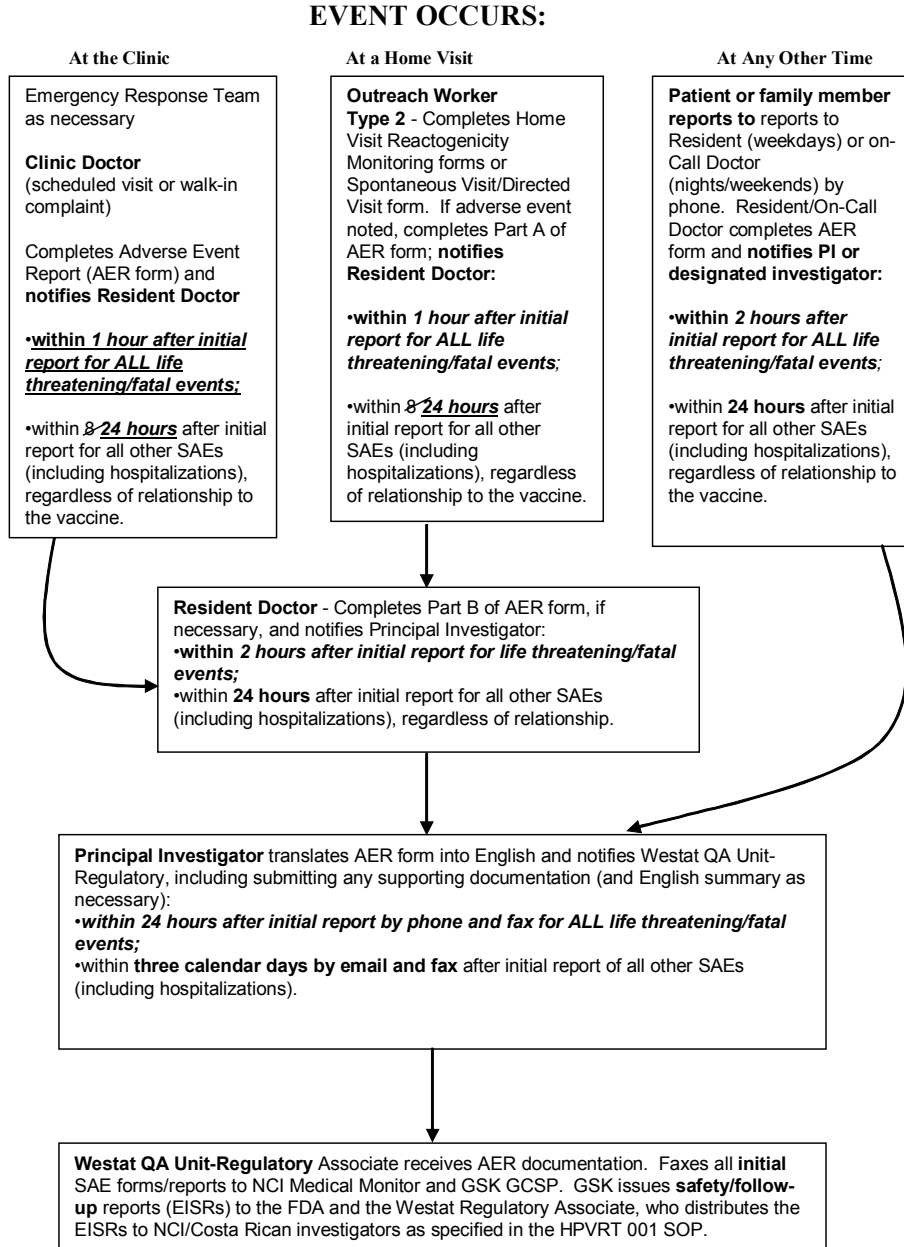

**Amendment 5: 10 September 2009**

|                                                                                                                                                                                                                                                                                                                                                                                                                                                                                                                                                                                                                                                                                                                                                                                                                                                                                                                                                                                                                                                                                                                                                                                                                                                                                                                                                                                                                                                                                                                                                                                                                                                                                                                                         |                                                                                                                                                                                                                                                                                                                                                 |
|-----------------------------------------------------------------------------------------------------------------------------------------------------------------------------------------------------------------------------------------------------------------------------------------------------------------------------------------------------------------------------------------------------------------------------------------------------------------------------------------------------------------------------------------------------------------------------------------------------------------------------------------------------------------------------------------------------------------------------------------------------------------------------------------------------------------------------------------------------------------------------------------------------------------------------------------------------------------------------------------------------------------------------------------------------------------------------------------------------------------------------------------------------------------------------------------------------------------------------------------------------------------------------------------------------------------------------------------------------------------------------------------------------------------------------------------------------------------------------------------------------------------------------------------------------------------------------------------------------------------------------------------------------------------------------------------------------------------------------------------|-------------------------------------------------------------------------------------------------------------------------------------------------------------------------------------------------------------------------------------------------------------------------------------------------------------------------------------------------|
| <b>GlaxoSmithKline Biologicals</b>                                                                                                                                                                                                                                                                                                                                                                                                                                                                                                                                                                                                                                                                                                                                                                                                                                                                                                                                                                                                                                                                                                                                                                                                                                                                                                                                                                                                                                                                                                                                                                                                                                                                                                      |                                                                                                                                                                                                                                                                                                                                                 |
| Clinical Research & Development                                                                                                                                                                                                                                                                                                                                                                                                                                                                                                                                                                                                                                                                                                                                                                                                                                                                                                                                                                                                                                                                                                                                                                                                                                                                                                                                                                                                                                                                                                                                                                                                                                                                                                         |                                                                                                                                                                                                                                                                                                                                                 |
| <b>Amendment Approval Form</b>                                                                                                                                                                                                                                                                                                                                                                                                                                                                                                                                                                                                                                                                                                                                                                                                                                                                                                                                                                                                                                                                                                                                                                                                                                                                                                                                                                                                                                                                                                                                                                                                                                                                                                          |                                                                                                                                                                                                                                                                                                                                                 |
| <b>CPMS number</b>                                                                                                                                                                                                                                                                                                                                                                                                                                                                                                                                                                                                                                                                                                                                                                                                                                                                                                                                                                                                                                                                                                                                                                                                                                                                                                                                                                                                                                                                                                                                                                                                                                                                                                                      | NCI Protocol: 04-C-N191<br>GSK Biologicals Protocol: 580299/009 (HPV-009)                                                                                                                                                                                                                                                                       |
| <b>Protocol title:</b>                                                                                                                                                                                                                                                                                                                                                                                                                                                                                                                                                                                                                                                                                                                                                                                                                                                                                                                                                                                                                                                                                                                                                                                                                                                                                                                                                                                                                                                                                                                                                                                                                                                                                                                  | A double blind, controlled, randomized, phase III study of the efficacy of an HPV16/18 VLP vaccine in the prevention of advanced cervical intraepithelial neoplasia (CIN2, CIN3, adenocarcinoma <i>in situ</i> [AIS] and invasive cervical cancer) associated with HPV16 or HPV18 cervical infection in healthy young adult women in Costa Rica |
| <b>Amendment no.</b>                                                                                                                                                                                                                                                                                                                                                                                                                                                                                                                                                                                                                                                                                                                                                                                                                                                                                                                                                                                                                                                                                                                                                                                                                                                                                                                                                                                                                                                                                                                                                                                                                                                                                                                    | 5                                                                                                                                                                                                                                                                                                                                               |
| <b>Amendment date:</b>                                                                                                                                                                                                                                                                                                                                                                                                                                                                                                                                                                                                                                                                                                                                                                                                                                                                                                                                                                                                                                                                                                                                                                                                                                                                                                                                                                                                                                                                                                                                                                                                                                                                                                                  | 10 September 2009                                                                                                                                                                                                                                                                                                                               |
| <b>Coordinating author:</b>                                                                                                                                                                                                                                                                                                                                                                                                                                                                                                                                                                                                                                                                                                                                                                                                                                                                                                                                                                                                                                                                                                                                                                                                                                                                                                                                                                                                                                                                                                                                                                                                                                                                                                             | Ruchita Nadkarni                                                                                                                                                                                                                                                                                                                                |
| <b>Rationale/background for changes:</b> The primary reasons for this amendment are:                                                                                                                                                                                                                                                                                                                                                                                                                                                                                                                                                                                                                                                                                                                                                                                                                                                                                                                                                                                                                                                                                                                                                                                                                                                                                                                                                                                                                                                                                                                                                                                                                                                    |                                                                                                                                                                                                                                                                                                                                                 |
| <ul style="list-style-type: none"> <li>• To update the criteria for collection of heparinized blood (green cap tubes) from women who are being followed every six month due to a low-grade cytological finding.</li> </ul> <p>Starting on March 31, 2009, we have stopped the collection of additional heparinized blood from women who are being followed at 6-month intervals. Given that more than 3000 green cap samples from the second group of women listed above (annually for women in the six month folder) has been collected, sufficient numbers from which we can sample for nested studies has been reached. Additionally, the processing of these samples is very expensive, and with the study exit visit, the colposcopy effort has intensified. We will continue collecting green caps on the following groups of women:</p> <ul style="list-style-type: none"> <li>○ PID 5 during V36</li> <li>○ Immunogenicity sub-cohort during V36</li> <li>○ Tissue collection at colposcopy (one collection per colposcopy cycle, if possible at the first tissue collection)</li> </ul> <ul style="list-style-type: none"> <li>• To clarify the methods for using self-collected samples. To clarify that women who test positive for the corresponding HPV type at the 6-month visit by either the clinician or self-administered collection methods used will be excluded from the ATP analysis.</li> <li>• To define the alpha-spending plan for the 5th secondary objective to account for the interim analysis proposed in the Statistical Analysis Plan (SAP) for Initial Analyses that was previously submitted to the FDA.</li> </ul> <p>A SAP for initial analyses that focuses on virological endpoints has been</p> |                                                                                                                                                                                                                                                                                                                                                 |

developed and submitted to the FDA. To account for this SAP and for the fact that one of its objectives overlaps with the 5<sup>th</sup> secondary objective listed in the protocol, an alpha spending plan has been incorporated into the protocol.

- To include mention that pathologists responsible for histology review are NCI-*designates*, and not exclusively NCI pathologists in section 3.19.2.

With the replacement of Dr. Diane Solomon with Dr. Mary Sidawy in protocol amendment #4, our pathology team is composed of both NCI pathologists and NCI designated pathologists. We have added wording to clarify this point in the protocol.

- To include the use of Twinrix® as a crossover vaccination vaccine.

In order to reduce clinic visits, women who are eligible to receive both the hepatitis A vaccine and hepatitis B vaccine during the crossover vaccination will be offered vaccination with Twinrix® [Hepatitis A Inactivated & Hepatitis B (Recombinant) Vaccine].

- To clarify close-out activities at study completion.

To avoid unnecessary delays in offering crossover vaccination to women who have completed their 4 years of participation in the study, we will conduct data clean-up and data freeze after completion of study activities in a staggered/batched fashion to enable a more timely unblinding for crossover.

- Other minor revisions have been made and are noted throughout the protocol in *bold, italic* text.

Details of the revision and identification of the affected protocol sections are provided below. **Amended text has been included in bold, italic text and deleted text is shown with strikethrough.**

### Footnote for Table 2 Timeline of Costa Rican HPV16/18 VLP Vaccine Trial Activities

\*\*\*This blood draw will be performed on a subset of women, and at selected study visits, as follows: A) A random sample of women at 0, 12, and 36 months; B) All women referred to accelerated screening visits per management algorithm, at yearly intervals *before March 31, 2009 (Amended: 10 September 2009)*; C) All women referred for colposcopic evaluation who require a biopsy or LEEP, at the time of the colposcopy visit; D) women enrolled in the immunogenicity subcohort after March 1, 2006.

### 3.3.4 Elimination criteria from the ATP analyses during the study

For the primary according to protocol (ATP) analysis planned for our study, the following elimination criteria may apply. These are also discussed in the statistical analysis section of this protocol (Section 4.2).

- Women who do not receive all three doses of the vaccine within the protocol-specified intervals (see Table 4).

- Women who are found to be HPV16 and HPV18 DNA positive (*for the corresponding type considered in the analysis*) during the vaccination phase, *by clinician and/or self-administered collection* (months 0 or 6) (*Amended: 10 September 2009*).

### 3.5 Trial Arms and Randomization

Since knowledge of vaccine arm assignment would not affect treatment of participants who have an SAE, no provision is made to allow for unblinding on site in Costa Rica. Unblinding of individual participants, at the request of the DSMB, the IRBs, the GSK Global Clinical Safety Department or the NCI Medical Monitor as part of reporting requirements to the FDA (e.g., for rapid reporting of an unexpected SAE associated with vaccination) will be allowed. This individual unblinding will be performed in a manner that assures that the overall study blinding is maintained, that staff involved in the conduct, analysis, or reporting of the study remain blinded except where absolutely impractical, and that any unblinding be appropriately documented (*see also Section 3.16.3, Exiting Women from the Trial*) (*Amended: 10 September 2009*). Treatment codes will be kept at NCI and GSK under controlled/secured access.

### 3.6 Study Vaccines

It should be noted that after completion of this trial and under a separate protocol, participants will be offered cross-over vaccination. This will include offering the licensed formulation of *Havrix* (1440 ELISA units/0.5 mL) hepatitis A vaccine to women who received the HPV16/18 VLP vaccine and the *licensed* HPV16/18 VLP vaccine to women who received the investigational hepatitis A vaccine (~~if the HPV16/18 VLP vaccine is found to be effective and the DSMB and Costa Rica IRB approve~~) (*Amended: 10 September 2009*). In addition, all women will be offered vaccination with Engerix-B® (Hepatitis B Vaccine [Recombinant]; Manufactured by GlaxoSmithKline Biologicals, Rixensart, Belgium). *In order to reduce clinic visits, women who are eligible to receive both the hepatitis A vaccine and hepatitis B vaccine will be offered vaccination with Twinrix® [Hepatitis A Inactivated & Hepatitis B (Recombinant) Vaccine]* (*Amended: 10 September 2009*).

#### 3.16.3. Exiting Women from the Trial (Amended: 13 Nov 2008)

*Activities at study completion (Amended: 10 September 2009)*

*The Data and Safety Monitoring Board (DSMB) for our trial has recommended cross-over immunization of both treatment and control recipients. The participants who received the HPV vaccine will be offered vaccination against hepatitis A and hepatitis B and participants who received the control vaccine will be offered vaccination against HPV-16/18 and hepatitis B, as appropriate. Vaccines to be used during cross-over immunization are the formulations licensed for use in Costa Rica. Cross-over immunization will be implemented by NCI and Costa Rican investigators under a separate protocol they have developed.*

*Implementation of cross-over immunization will require unblinding. Unblinding information and cross-over will not be offered to participants until they have been*

*exited (closed out) from the present study and their data for this study have been frozen in the study databases. Exiting of participants in the trial will occur in an ongoing/batched manner as participants complete their 4-year participation in our study and after ongoing SAEs or pregnancies are resolved, or on October 3, 2010 (10 months after the 4-year anniversary for the last woman enrolled), whichever comes first. This will ensure that study blind is maintained for individual participants until their data for the final analysis is frozen.*

*If cross-over immunization cannot be offered to a subject (e.g., because of medical reasons) or the subject refuses cross-over immunization, unblinding information will be provided after the participant has exited the current study and her data has been frozen. This will occur at the time of the first cross-over implementation visit, at which time participation/eligibility for cross-over immunization will be determined.*

### 3.17.3 Blood Collection

...This third blood draw will be collected for ancillary research purposes on a subset of participants, including a random sample of 10% of participants at enrollment and at their 12 and 36 month visits (to document the distribution of the immune responses in our population before and after vaccination), women referred to accelerated screening visits at six-month intervals through **March 31, 2009 (Amended: 10 September 2009)** (this group would have the additional blood sample collected annually), women who are referred for colposcopic evaluation and require a biopsy or LEEP, and women enrolled in the immunogenicity subcohort of our trial after March 1, 2006.

### 3.19.2 Histology

In addition to the Costa Rican diagnosis, *an NCI designated (Amended: 10 September 2009)* pathologist (Amended: 13 Nov 2008) with expertise in cervical pathology will periodically diagnose all histological specimens, blinded to the initial Costa Rican diagnosis.

## 4.1 Overview

Additional exploratory tertiary and ancillary analyses will be conducted by the NCI and Costa Rican investigators and will evaluate numerous issues, as described in the Tertiary Objectives and Ancillary Analyses & Studies sections of this protocol (Section 2.3 and Section 2.4).

No interim statistical analyses for *the primary efficacy endpoint* are planned at this time (**Amended: 10 September 2009**).

Adverse events (AEs) observed in the course of the trial will be carefully monitored. Both expected and unexpected AEs will be examined. Rates of specific solicited, unsolicited, and serious AEs (SAEs) will be compared by treatment arm and evaluated. These analyses will be performed throughout the trial by the DSMB (study personnel will remain blinded) and will not affect the overall alpha level of the study.

## 4.6 Interim Analysis

No interim statistical analyses for efficacy ~~are~~ *were* planned ***at the beginning of the trial (Amended: 10 September 2009)***. A need for an interim analysis for efficacy may arise during the trial. Should this occur, the study protocol will be amended, and the amendment submitted to the US FDA for review. To assist the DSMB in making decisions regarding interim analyses in the future, a set of guidelines are provided separately from this protocol in the DSMB Charter.

***A Statistical Analysis Plan (SAP) for initial analyses that focuses on virological endpoints has been submitted to the FDA. The analyses proposed within are largely exploratory in nature, but there is one overlap between an objective in the SAP for initial analysis and secondary objective #5 listed in this protocol (i.e., for secondary objective 5 listed in this protocol, we are proposing to conduct an interim analysis). Given this overlap, for secondary objective #5 listed in this protocol, the following alpha adjustment plan will be implemented: The overall alpha of 0.025 (one-sided) will be split into 0.001 for the interim analysis proposed in the SAP for initial analyses and 0.024 for the final analysis. As specified in more detail in the SAP for initial analysis, power (assuming 80% vaccine efficacy and 20 or more total events) should remain above 85-90% for the final analysis of secondary objective #5 (Amended: 10 September 2009).***

***No stopping rule will be applied at this stage; blinding will be maintained and follow-up will continue for all subjects until Month 48 (Amended: 10 September 2009).***

## Appendix D

### 11. Pregnancy

...All new pregnancy and pregnancy outcome information for study participants, whether or not an SAE is involved, will be transmitted to the Westat Regulatory Associate via a read-only electronic mail report within 5 business days (i.e., no longer than ~~120~~ **40** business hours) ***(Amended: 10 September 2009)***.

**Title: Extended follow-up of young women in Costa Rica who received vaccination against human papillomavirus types 16 and 18 and unvaccinated controls**

**NCI Protocol number: 09-C-N106**

**Costa Rica Protocol number: CEC-ICIC-038-2014**

**Version date: February 27, 2009**  
**Amendment 1: March 22, 2010**  
**Amendment 2: March 25, 2011**  
**Amendment 3: October 14, 2014**  
**Amendment 4: July 06, 2015**  
**Amendment 5: November 23, 2015**

**Investigators:**  
**Paula Gonzalez**  
**Rolando Herrero**  
**Allan Hildesheim**  
**Silvia Jimenez**  
**Aimee Kreimer**  
**Carolina Porras**  
**Mahboobeh Safaeian**  
**Mark Schiffman**  
**Sholom Wacholder**  
**For the CVT group**

**Collaborators for anal and oral evaluation (chapter 10):** **Leen-Jan van Doorn**  
**Wim Quint**  
**Joel Palefsky**  
**Teresa Darragh**

## TABLE OF CONTENTS

- 1. Introduction**
  - 1.1. Background/Rationale**
  - 1.2. Scope of this protocol**
- 2. Study Objectives**
- 3. Methods**
  - 3.1. Study Population**
    - 3.1.1. Costa Rica HPV Vaccine Trial (CVT)**
    - 3.1.2. Unvaccinated Control Group (UCG)**
  - 3.2. Eligibility Criteria**
    - 3.2.1. Participants in the initial phase of the CVT**
    - 3.2.2. Unvaccinated Control Group**
      - 3.2.2.1. Inclusion Criteria**
      - 3.2.2.2. Exclusion Criteria**
    - 3.2.3. Deferral Criteria**
  - 3.3. Recruitment and Follow-Up Plan**
    - 3.3.1. Recruitment of CVT Women Into the LTFU**
    - 3.3.2. Recruitment of the Unvaccinated Control Group**
    - 3.3.3. Follow-Up**
      - 3.3.3.1 Regular Screening (two year Intervals)**
      - 3.3.3.2 Accelerated Screening (six month Intervals)**
      - 3.3.3.3 Colposcopy**
      - 3.3.3.4 Clinical management for women from the original control arm who are not part of the immunogenicity sub-cohort at their last study visit**



**3.3.3.5 Immunogenicity Sub-cohorts**

**3.3.3.6 Last approved screening visit (L72)**

**3.4. Clinic Visits During Long Term Follow-Up**

**3.4.1. Risk Factor Interview Questionnaires**

**3.4.2. Pelvic Exams**

**3.4.3. Blood Collection**

**3.4.4. Oral Specimen Collection-Immunogenicity subcohort only**

**3.5. Referral to additional study visit or colposcopy after L72**

**3.6. Biospecimen Processing, Storage and Shipment**

**3.7. Laboratory Tests**

**3.7.1. Testing for Clinical Management**

**3.7.1.1. Cytology**

**3.7.1.2. Histology**

**3.7.1.3. HPV DNA Testing**

**3.7.2. Other Tests**

**3.8. Adverse Event Monitoring**

**3.8.1. Adverse Events Occurring Between Clinic Visits**

**3.8.2. Adverse Events Reported Through the Toll-Free Telephone Number**

**3.8.3. Monitoring Pregnancy Outcomes**

**3.8.4. Monitoring Baby Adverse Events**

**3.9. Efforts to Maximize Participation**

**4. Human Subjects Protection**

**5. Oversight**

**6. Statistical Analysis Plan and Power**

**7. Collaborators and Consultants**

**8. Budget**

**9. Projected Timetable**

**10. Collection of Extracervical Samples**

**References**

**Attachments**

**Attachment 1- "Rationale and design of a community-based double-blind randomized clinical trial of an HPV 16 and 18 vaccine in Guanacaste, Costa Rica"**

**Attachment 2- Invitation letter and informed Consent for CVT group**

**Attachment 3- Invitation letter and informed Consent for UCG group**

**Attachment 4- Drafts of risk factor screening questionnaires**

**Attachment 5- Working Group Roster**

**Attachment 6 – Addendum to Informed Consent version 1**

**Attachment 7 – Addendum to Informed Consent version 2**

**Attachment 8 – Addendum to Informed Consent version 3**

**Attachment 9 - Informed consent for women who received fewer than three doses of HPV vaccine during CVT and a group with complete vaccination (ICFDCV)**

**Attachment 10 – Addendum to Informed Consent Form version 4**

**Attachment 11 – Addendum to Informed Consent Form version 5**

**Attachment 12 – Screening Guidelines for the Prevention and Early Detection of Cervical Cancer**

**Attachment 13 – Exit Plan**

## Synopsis

Human papillomavirus (HPV) infection is necessary for the development of cervical cancer. Worldwide, infection with HPV types 16 and 18 account for approximately 70% of cervical cancer cases. Currently available data suggest that prophylactic vaccination against HPV types-16 and 18 is nearly 100% effective in preventing persistent cervical infections and resultant disease from these types for at least five years following vaccination. Intramural NCI and a group of Costa Rican investigators have had long-time involvement in studies to elucidate the natural history of HPV and cervical cancer, and in the development of prophylactic HPV vaccines. In 2004, we initiated a community-based randomized clinical trial in Costa Rica to evaluate the safety and efficacy of a bivalent virus-like particle HPV-16/18 vaccine. The study successfully randomized 7,466 women; active follow-up of these women is underway and is planned for 4 years. Herein, we propose to extend follow-up of women recruited into this trial and vaccinated with the HPV-16/18 vaccine at the start of CVT for up to an additional 6 years, for a total of up to 10 years of follow-up. We expect to provide the HPV-16/18 vaccine to women in the control arm of the trial after the initial 4 years of follow-up are completed, and propose to follow them for an additional 2 years, to monitor vaccine safety and to maximize detection of persistent infections and lesions resultant from HPV exposure that occurred before cross-over to the HPV vaccination (a subset of these women will be followed for the entire 10 years). We will also enroll and follow a new group of approximately 3000 women who will be followed with state-of-the-art screening and will serve as an unvaccinated control group (UCG) during the extended follow-up period. Women will be screened at two year intervals. Women with evidence of cervical abnormalities will have accelerated screening and will be referred to colposcopy for evaluation and treatment if needed. Questionnaires and biological specimens collected during this follow-up period will allow for many unique scientific and women's health questions to be addressed.

There are three overarching objectives for this effort. They are as follows:

1. To evaluate the 10-year global impact of HPV-16/18 vaccination of young adult women;
2. To evaluate determinants of the immune response to HPV and the vaccine, and markers of long-term protection; and,

3. To evaluate the natural history of HPV and cervical disease in vaccinated and unvaccinated populations.

This research will provide invaluable data that will allow for the continued investigation into the risks and benefits of the prophylactic HPV vaccine.

## **1. Introduction**

### **1.1. Background/Rationale for the Costa Rica Vaccine Trial**

Two decades of research on the role of human papillomavirus (HPV) infection in cervical cancer pathogenesis have led to the understanding that persistent infection with one of a group of approximately 15 HPV types is necessary for the development of cervical cancer (1). This understanding has led to opportunities to develop cancer prevention efforts based on screening programs to detect and treat persistent HPV infection and lesions and on vaccination to prevent initial infection (2).

Three prophylactic HPV vaccines based on L1 (L1 is the major capsid protein of the virus) virus-like particles (VLP) initially co-discovered at NCI have now been licensed for use in several countries (3-5). The first two vaccines to be approved were Gardasil from Merck and Cervarix from GlaxoSmithKline, both vaccines have been licensed since several years ago in Europe, United States, Costa Rica, and many other countries. Recently, a new vaccine called Gardasil 9 from Merck was licensed in the United States and Europe. The first two vaccines, Gardasil and Cervarix, target two HPV types that together account for up to 70% of cervical cancer cases worldwide (HPV types 16 and 18). Both vaccines, while using the same virus-like particle (VLP) based technology, contain distinct adjuvants; whether this will impact long-term performance and/or safety profile is unknown. The third vaccine, Gardasil 9, extends coverage to 5 additional high-risk HPV types.

Licensure of the first two vaccines has been based on results from company-sponsored multicentric randomized clinical trials that have demonstrated a very high level of protection (near 100%) afforded by vaccination against the development of persistent infections and/or cervical pre-cancers associated with the HPV types included in the vaccines among women who are naïve to these same HPV types at the time of vaccination (i.e., prophylactic efficacy). These same studies have shown that duration of protection is observed for at least 5 years (6, 7). Evaluation of a possible effect of vaccination on pre-existing HPV infections (i.e., therapeutic efficacy) within our trial in Costa Rica (CVT) has shown a lack of effect of vaccination on established infections (8).

Based on these results and Food and Drug Administration (FDA) licensure of Gardasil, the CDC's Advisory Committee for Immunization Practices (ACIP) has recommended vaccination of girls 11-12 years of age (i.e., prior to sexual debut for maximal prophylactic effect), with vaccination as early as 9 years when indicated and catch-up vaccination of girls/women ages 13-26. The latter recommendation for catch-up vaccination acknowledges benefit of this vaccine for girls/women who remain virginal during some or all of this period and possible residual benefit for sexually active women in this age range who have not yet been exposed to all of the HPV types included in the vaccines. However, the magnitude of this residual benefit has not yet been quantified, so the public health benefit derived from vaccination of young adult women remains unclear. In a few countries (not in the United States or Costa Rica), vaccination has been approved for even older women, although many investigators believe that vaccination of middle-aged women is unlikely to provide substantive benefit with regards to cancer prevention (9, 10).

With licensure of these vaccines, the most pressing public health questions have shifted from those related to whether the vaccine works (efficacy) to questions of how best to implement the vaccine for maximal benefit (population impact), as well as long-term safety and efficacy. Defining use of the vaccine has been difficult given the limited understanding of various issues/questions that would importantly affect overall population impact and cost effectiveness of vaccination, including duration of protection beyond 4-5 years; the impact of vaccination among adult, sexually active women, the impact of vaccination among women who received fewer than three doses of HPV vaccine and the impact of vaccination in areas with established screening programs, among others. Scientific questions regarding HPV, the HPV vaccine, and HPV-related diseases in a vaccination era have also been raised by the natural history and vaccine studies to date. For instance, it is important to investigate if removal of HPV-16/18 will result in an increase of rates of pre-cancer/cancer caused by other carcinogenic HPV types (replacement).

Since the mid 1980's, the Division of Cancer Epidemiology and Genetics of the National Cancer Institute, in collaboration with investigators from several institutions in Costa Rica, have conducted studies regarding cervical cancer and HPV infection including a case-control study of cervical cancer and a

10,000-woman population-based cohort study of HPV and cervical neoplasia. The profound knowledge of the natural history of HPV infection and cervical neoplasia in Guanacaste, Costa Rica, together with the promising results of pre-clinical and early clinical HPV vaccine trials, facilitated the 2004 launch of a community-based randomized phase III clinical trial to evaluate the efficacy of a VLP HPV vaccine, involving a cohort of 7,466 vaccinated women (referred to henceforth as the Costa Rica HPV Vaccine Trial or CVT).

The methods of the CVT are described in greater detail in the Attachment 1. Briefly, the main objectives of the first 4 years of CVT are to evaluate the efficacy of the HPV-16/18 bivalent vaccine against incident HPV-16/18 persistent infection and CIN2+ associated with HPV-16/18, evaluate safety of the HPV-16/18 bivalent vaccine, explore immunological determinants of protection and evaluate broader effects of the vaccine, including cross-protection, therapeutic effect and impact of HPV-16/18 vaccination on overall rates of various outcomes.

Identification of potential participants was based on a census of the young female population conducted in the Province of Guanacaste and regions of the adjacent Province of Puntarenas between February and July 2000, with an update of urban areas in 2005 to assist with the recruitment effort. Women between the ages of 18 and 25 identified via this census were contacted and asked to participate. Following screening for eligibility, 7,466 women were enrolled representing approximately 59% of those eligible for participation and 30% of the 24,467 women screened. To be eligible, women had to fulfill the following requirements at the time of entry: age 18 to 25 years (inclusive), planned residence in the study area for the 6 months following enrollment, ability to speak/understand Spanish, good general health as determined by a history and physical examination, and willingness to provide written informed consent. Specific exclusion criteria applied at enrollment included: history of chronic or immunodeficient conditions requiring treatment; history of allergic reaction to any vaccine or of significant allergic conditions, suspected allergy or reactions to components of the vaccine or to latex; history of vaccination against hepatitis A or a known history of hepatitis A infection; history of recent (within 6 months) chronic administration of immunosuppressants or immune-modulating drugs; and an unwillingness to use an effective method of birth control for a period covering the vaccination phase of the trial (sexually active

individuals). Enrollment of pregnant women was deferred until they were three months post-partum and no longer breastfeeding. No screening for HPV DNA or antibodies was performed before enrollment/vaccination, although pre-vaccination specimens were taken for subsequent analysis.

Participants were randomized in a blinded fashion to the HPV vaccine (supplied by GSK within a clinical trial agreement/Cervarix) or control (Hepatitis A vaccine/HAV) arms of the trial and offered 3 doses of vaccine over a period of approximately 6 months. The vaccination phase of the trial was completed for the last woman on September 25, 2006. Overall, 80.2% of participants received all three vaccination doses, 12.4% received 2 doses, and 7.4% received a single dose of vaccine. During the vaccination phase, all participants were carefully monitored for reactogenicity and adverse events. Monitoring was performed at the clinic immediately following each vaccination for all participants and via a home visit in the week following vaccination for a 10% systematic random sample of participants. A toll-free telephone number was provided to all participants, who were instructed to call should they experience any health events. Adverse events were carefully documented and followed to resolution.

Following the vaccination period, participants are being followed with cytology and HPV DNA testing at annual intervals for a period of 4 years; adverse event information is collected at each contact. During follow-up, women with evidence of mild cervical abnormalities are referred to accelerated screening every 6-months. Those with evidence of repeated mild abnormalities or with evidence of more severe abnormalities are referred to colposcopy for evaluation and treatment as needed.

During the enrollment and follow-up clinic visits, a risk factor questionnaire is administered to all participants. A pelvic examination is performed for sexually active women at all visits with the exception of the 1-month and 6-month visits (n.b. women with evidence of mild abnormalities at enrollment do have a pelvic examination performed at the 6-month visit). An immunogenicity subcohort has been defined to permit more extensive evaluation of immunological parameters associated with vaccination. Extensive biological specimens are collected during enrollment and follow-up for clinical management and research purposes, including serum, plasma, peripheral blood mononuclear cells (PBMCs), cervical secretions, and cervical cells. Compliance with specimen collection has been >95%.



Liquid-based cytology specimens (Thinprep) prepared from cervical cells collected during pelvic examinations are evaluated by a local study cytopathologist, with abnormal findings and a random sample of normal slides evaluated independently by a US-based cytologist in the United States. Broad-spectrum, type-specific HPV DNA testing is performed by PCR on an ongoing basis using aliquots of cervical specimens collected at all visits with a pelvic exam. Testing for antibodies against HPV-16 and HPV-18 VLPs is also ongoing for serum specimens collected from all women. This will allow for careful assessment of cytological and HPV status at entry and during follow-up.

Women who are referred to colposcopy are evaluated by one of the study colposcopists. When indicated, biopsy and/or Loop Electrosurgical Excision Procedure (LEEP) specimens are obtained for diagnostic and research purposes. Histological specimens are routinely evaluated by the Costa Rican study pathologist. Periodically, these same specimens are independently evaluated by the US-based study pathologists using a pre-established algorithm to define the final histological diagnosis.

To date, retention rates have been high; approximately 5% of participants have discontinued the study. Over 86% of women enrolled in the trial have been seen at least annually.

At the final visit of the phase III trial, the collection of additional samples (oral rinse and anal swab) allowed for analyses that showed the short-term vaccine efficacy against HPV 16 and HPV 18 infections at the oral region and the anus (30, 33), where it has been established that HPV 16 causes a subset of these cancers. Finally, at the end of the initial phase of the CVT trial, assuming a favorable recommendation is made by the trial data and safety monitoring board (DSMB) and IRBs, we plan to offer cross-over vaccination to all participants. Those randomized to the HPV arm in the initial 4 years will be offered the hepatitis A vaccine; those randomized to the HAV arm will be offered the HPV vaccine. We are also planning to offer women from both arms the hepatitis B vaccine as an additional benefit of participation.

CVT is one of only two large community-based trials initiated pre-licensure (2 years before licensure of Gardasil & 4+ years before first licensure of the GSK vaccine used in our trial). Given its size, design, and high participation rates, CVT is an excellent setting in which to address many of the issues/questions regarding population impact for cervical disease prevention, and will allow evaluation of other pertinent vaccine questions as described above. With additional years of follow-up, CVT is uniquely poised to evaluate the long-term vaccine impact, particularly among women who received fewer than three vaccine doses, which is of utmost importance and could have a mayor public health impact by significantly reducing the cost and effort to provide HPV vaccination worldwide (31, 32). Evaluation of the continued protection against HPV 16/18 infections at non-cervical anatomical sites including the anus and oral region is also important.

The Guanacaste Project is a large research center dedicated to HPV and cervical cancer research. Its staff includes epidemiologists, clinicians, nurses, pharmacists, microbiologists, molecular biologists and statisticians with ample experience to conduct complex epidemiologic studies and clinical trials under Good Clinical Practice (GCP) and with extensive quality assurance. The infrastructure includes 4 study clinics, a state of the art biorepository, and laboratories for cytology, histology, HPV testing and peripheral blood mononuclear cell (PBMC) cryopreservation.

## **1.2. Scope of this protocol**

In the present protocol, we propose to extend the follow-up period of our cohort of women who were vaccinated with the HPV-16/18 vaccine at the start of CVT and lived in the Guanacaste province and a few areas of Puntarenas close to Guanacaste by up to 6 years with screening at years 6, 8, and 10 after the original enrollment, which is 2, 4, and 6 years after completion of the initial 4 years of follow-up planned as part of CVT. For women who comprised the control arm during CVT and lived in the Guanacaste province and a few areas of Puntarenas close to Guanacaste, we will follow them for an additional 2 years, to monitor vaccine safety and to maximize detection of persistent infections and lesions resultant from HPV exposure that occurred before cross-over to the HPV vaccination; of these women, we propose to follow for up to 6 years the ~600 women in the crossover immunogenicity subcohort (details to follow). Since we expect to provide the HPV-16/18 vaccine to almost all women in

the control arm of the vaccine trial after the initial 4 years of follow-up are completed, for future studies covering years five to 10 after enrollment into CVT, we would lack an internal, contemporaneous referent for rates of infection, cervical disease, and relevant adverse events in unvaccinated women. Therefore, we proposed to enroll and follow for a period of up to 6 years a new group of approximately 3,000 women who will be followed via screening and will serve as an unvaccinated control group (UCG) during the extended follow-up period. This new group of women will be from the same birth cohorts and geographic region as our vaccinated groups. This study is designed to address several questions about the long term efficacy of the HPV vaccine. As cervical cancer screening recommendations continue to change with new evidence on best practice, this study will aim to stay abreast of current practice, and may therefore implement changes to test methods and algorithms as needed.

This concept has been reviewed and approved by the DCEG scientific advisory group (SAG) and an external Scientific HPV Working Group established to ensure scientific rigor of activities undertaken within the Costa Rica Vaccine Trial. The protocol has also been approved by the NCI TEP.

## **2. Study objectives**

The main objective of the Costa Rica Vaccine Trial initiated in 2004 is to evaluate the efficacy of the candidate vaccine to prevent persistent HPV-16/18 infections and related histopathologically confirmed CIN2+ lesions among the according to protocol subcohort as well as the overall study population. Several additional objectives include evaluation of 1) vaccine safety, 2) vaccine efficacy against persistent HPV infections or CIN2+ lesions associated with other carcinogenic HPV types, 3) vaccine immunogenicity among a subgroup of women, and 4) other possible surrogate endpoints, such as a possible therapeutic effect of the vaccine and vaccination impact on the distribution of HPV types and variants.

The objectives of this protocol are to evaluate the longer-term vaccine effects and to permit evaluation of numerous questions regarding 1) HPV vaccine immunology, and 2) the epidemiology of HPV and associated disease that cannot adequately be addressed in the first 4 years of follow-up or that can be

addressed with increased power by increasing follow-up time. Importantly, follow-up through 10 years will allow for the evaluation of the HPV-16/18 vaccine among women through their early to mid-30s, therefore extending follow-up through the peak years of pre-cancer diagnosis among well-screened women. A more comprehensive evaluation of vaccine impact will therefore be possible, and larger numbers of pre-cancer outcomes (particularly pre-cancers caused by HPV types other than HPV-16/18) will be accrued for the various analyses envisioned. The recruitment and follow-up of the UCG will strengthen our ability to evaluate the objectives listed.

There are three overarching objectives for this effort. They are as follows:

1. To evaluate the 10-year global impact of HPV-16/18 vaccination of young adult women;
2. To evaluate determinants of the immune response to HPV and the vaccine, and markers of long-term protection; and,
3. To evaluate the natural history of HPV and cervical disease in vaccinated and unvaccinated populations.

More specific goals within each of the broad objectives listed above are summarized below.

1. Impact over 10 years of HPV-16/18 vaccination of young adult women
  - a. To evaluate the prophylactic vaccine efficacy
    - i. against HPV types contained in the vaccine (HPV-16/18) [overall and by time since vaccination]
    - ii. against other carcinogenic HPV types (primarily those in  $\alpha$ -7/ $\alpha$ -9 species) [overall and by time since vaccination]
    - iii. when fewer than three doses are administered
    - iv. against HPV infections in selected non-cervical sites (anus and oral region)
  - b. To evaluate the impact of vaccination on rates of pre-cancers associated with carcinogenic HPV types not prevented by the vaccine
  - c. To evaluate total impact of vaccination on cumulative rates (all carcinogenic HPV types combined) of HPV persistence and pre-cancer (Population impact)
    - i. overall

- ii. by age at vaccination
    - iii. by virologic status @ vaccination
  - d. To evaluate long-term safety of the HPV-16/18 vaccine.
  - e. To investigate the determinants of genital HPV incidence, persistence and progression for types other than HPV-16/18 (HPV epidemiology in a HPV vaccinated cohort)
2. Immunological markers of long-term protection
- a. To elucidate patterns of antibody, B-cell, and T-cell responses to vaccination that predict long-term protection versus failure
  - b. To define minimum antibody levels or time since vaccination below/after which vaccine boosting should be recommended by number of vaccine doses received

In addition to these primary objectives, the present effort will provide the opportunity to address questions regarding the natural history of HPV and cervical neoplasia in vaccinated and unvaccinated populations.

### **3. Methods**

Detailed standard operating procedures (SOPs) will be developed for this study and study staff will be trained to use the SOPs.

#### **3.1. Study Population**

##### **3.1.1. Costa Rica HPV Vaccine Trial (CVT)**

The vaccine trial enrolled 7,466 women, approximately 30% of the 18-25 year old female population living in Guanacaste or nearby areas of the Puntarenas province. To be eligible, women had to fulfill the following criteria: residents of Guanacaste or nearby Puntarenas province at the time of enrollment; able to speak Spanish; in good general physical and mental health; no previous history of hypersensitivity to any of the vaccines or its components used in the trial; no history of chronic or immunodeficiency conditions, no history of previous hepatitis A infection or vaccination; no pregnancy or plans to become pregnant during the vaccination period; no breastfeeding and no hysterectomy; if of childbearing potential, potential participants had to be willing to use an acceptable contraception method during the vaccination

period; and, willing and able to provide informed consent. The methods of the CVT are described in greater detail in Attachment 1.

Participants' adherence to the protocol has been high, with an overall retention rate of about 95% of women enrolled and compliance to their annual scheduled visits of over 85%. Similarly, participation and compliance with this long term follow up protocol (LTFU) is expected to be high. Even with high retention rates, a special effort will be made to contact women who received fewer vaccine doses (e.g. not previously invited, stopped attending visits during CVT, discontinued their study participation during CVT or lived outside the study area) and invite them to participate in the remaining visits of the protocol. Additionally, a group of women who received all three doses with the same criteria (not previously invited, stopped attending, discontinued their study participation during CVT or lived outside the study area) will also be contacted, so that they can also participate in the remaining visits of the LTFU protocol.

As described previously, all women randomized to the control arm of CVT will be offered the HPV-16/18 vaccine after completion of the initial 4 years of follow-up. Therefore, during the LTFU, most women in both trial arms are expected to have received the HPV-16/18 vaccine. One group will have been offered vaccination between the ages of 18-25 and the second between the ages of 22-30. For those women who were originally in the control arm and received the HPV-16/18 vaccine after the initial 4 years of follow-up, their participation in this protocol will be confined to a visit at year 6, to monitor vaccine safety and to capture outcomes associated with exposures pre-crossover. A subset of these women in the crossover immunogenicity subcohort will be followed for the full 6 years. See section 3.3.3.4 for more details.

### **3.1.2. Unvaccinated Control Group (UCG)**

As described previously, during the LTFU, the majority of women from CVT, in both trial arms, will have received the HPV-16/18 vaccine. For this reason, it will be necessary to recruit a group of unvaccinated women as controls of the HPV-16/18 vaccine. We are planning to recruit a new control group of approximately 3,000 women for the LTFU. The unvaccinated control group (UCG) will provide a referent

for rates of infection, cervical disease, and serious adverse events in unvaccinated women during the extended follow-up period.

Recruitment of an unvaccinated control group can be considered ethical for the following main reasons:

1. All women in the new control group will be older than the ideal age for vaccination (11-12 years), and approximately half of them will be older than 26 (by 2009), the maximum age approved for catch-up vaccination by the US FDA and Costa Rica Ministry of Health. Therefore, the HPV vaccine is not considered standard of care for women over the age of 26.
2. For women ages 22-26 recruited into the UCG, virological and cytological screening is not only an effective alternative to HPV vaccination, but in many ways is superior to HPV vaccination.
  - a) Among sexually active women (we expect all but approximately 150 women in the UCG to be sexually active), HPV vaccination is not effective at treating established infection, whereas screening programs followed by treatment are highly effective.
  - b) Vaccination protects only against the subset of cancers caused by HPV-16/18 (and possibly partially against a subset of cancers caused by HPV-16/18 related types) whereas screening protects against all cancers, regardless of HPV type.
3. The quality of the screening women will receive as part of this study is higher compared to that which they would receive as part of standard care; they will also receive state of the art treatment as necessary.
4. Vaccination of adolescents has not been incorporated into the national health care system vaccination program and implementation of catch-up vaccination of young adult women appears highly unlikely to be considered by national authorities. Even in most developed countries, vaccination of women over the age of 26 is not recommended. Women are free to get the vaccine outside of the study if they choose; this information will be queried at each visit, documented, and used in the analytic phase of the study.

The new control group will initially be identified via a new census of young adult women performed between March and July 2008 in the catchment area of the CVT. Women identified via this new census who are not already participants in CVT will be considered potentially eligible for participation as controls. To maximize comparability between the two vaccinated arms and the new control group, the new control group will be selected from the same geographical areas and birth cohorts as participants in CVT.

### **3.2. Eligibility Criteria**

#### **3.2.1. Participants in the initial phase of the Costa Rica Vaccine Trial (CVT)**

Women who participated in the CVT and lived in the Guanacaste province and a few areas of Puntarenas closest to Guanacaste will be eligible for the LTFU study. Women who received the HPV-16/18 vaccine at the start of CVT will be invited for up to 6 years of additional follow-up, and women who were originally in the control arm of CVT and were offered the HPV-16/18 vaccine at crossover will be invited for an additional 2 years of follow-up. A subset of the control arm women who are in the crossover immunogenicity subcohort will be followed the full 6 years. See section 3.3.3.4 for more details. Some women who received HPV vaccination and were not invited into the LTFU protocol (stopped attending their screening visits during CVT, discontinued their study participation during CVT or lived outside the study area) will be invited to participate in the LTFU protocol, particularly those who received an incomplete vaccination schedule.

#### **3.2.2. Unvaccinated Control Group**

To be eligible to participate in LTFU study, women invited to be part of the UCG must fulfill all of the following inclusion criteria:

##### **3.2.2.1. Inclusion Criteria**

- Gender: Female
- Age: Women born in or between July 1978 and November 1987



- Residence: Residents of Guanacaste Province and a few areas of Puntarenas closest to Guanacaste at some point during 2005
- Language: Able to speak/understand Spanish
- Mental Competence: Apparently mentally competent
- Consent: Written informed consent obtained prior to enrollment

### **3.2.2.2. Exclusion Criteria**

The following criteria will be checked at the time of enrollment for potential participants of the unvaccinated control group. If any apply, the participant will not be included in the study.

- History of cervical cancer,
- History of hysterectomy,
- Any important medical condition or other criteria that the investigator considers that precludes enrollment,
- Vaccination with Gardasil or Cervarix will be an exclusionary criterion, but few women are expected to have received these vaccines at the time of enrollment. Use of these vaccines after enrollment is not a criterion for study interruption but we plan to collect information on vaccination history so that the few women who report having been vaccinated with one of the HPV vaccines after enrollment can be evaluated separately at analysis.

### **3.2.3. Deferral Criteria**

All women will have scheduled visits deferred if they:

- Are sexually experienced but cannot have an adequate cervicovaginal specimen collected due to heavy bleeding (menstruation or other) or heavy vaginal discharge at the time of the visit.
- They report to be pregnant at the time of their routine visit or are less than three months post-partum.

## **3.3. Recruitment and Follow-up plan**

### **3.3.1. Recruitment of CVT women into the LTFU**

During the appointment process for the last CVT follow-up visit (48 months for most participants), women participating in the CVT and living in the Guanacaste province and a few areas of Puntarenas closest to

Guanacaste will receive written information regarding LTFU study and then at that final visit, will be asked to provide consent (Attachment 2). If for any reason a woman cannot be approached at visit 48, we will contact women subsequent to visit 48 to obtain consent. To evaluate the impact of HPV vaccination with fewer than three HPV vaccine doses, a special effort will be conducted to contact and invite to participate women who received fewer than three HPV vaccine doses; to better understand the potential findings a group that received all three vaccine doses will also be contacted and invited.

### **3.3.2. Recruitment of the unvaccinated control group**

Approximately 20,000 potentially eligible women were identified by a census conducted in March-July 2008; from this, women have been pre-selected for recruitment into the long-term follow-up phase of the study based on (1) year of birth and (2) area of residence (at the Canton level), and will be frequency matched to the CVT groups on these same variables. The women in the subset to be recruited will be selected in two waves. Having a second wave will allow us to adjust the selection weights to ensure balance with respect to the matching criteria. For the first wave, 3,000 women will be selected (assuming 75% response rate, this will yield 2,250). Replacement will be carefully monitored and only allowed after extensive attempts have been made by the field staff.

Women will be visited at their homes to receive information regarding the LTFU study and preliminary eligibility screening. Outreach workers will visit potentially eligible women at home to give them a personalized letter with an appointment to the nearest of the study clinics (Attachment 3). Women who appear eligible and express an interest in participating will be given a copy of the informed consent document to read and discuss with their families before the appointment (Attachment 3). Women are offered transportation in the study vehicles or reimbursement of travel expenses, as well as other expenses she may incur for the travel to the clinic such as food, but they will not be paid for participating in the study.

On the day of the visit, the receptionist at the clinic will verify the identity of the potential participant, administer an initial eligibility screener, and will explain the design and procedures of the study. Women who appear potentially eligible will have an extensive discussion of the informed consent document with a

trained interviewer, with nurses and doctors available to answer questions. The consent form, approved by the Costa Rica and NCI IRBs, includes details on HPV, the study, risks and benefits associated with participation, use of biological specimens and confidentiality among other topics (Attachment 3). Women who decide to participate will sign the informed consent form. Women who decide not to participate or who were deemed ineligible for any reason will be offered a physical exam and a Pap smear with a follow-up colposcopic evaluation and treatment if needed at no cost to them.

Since women enrolled into CVT have received extensive screening for cervical neoplasia over the first 4 years of the study and were treated as necessary, while the new control group is unlikely to have been screened as extensively, an initial “sweep” of the new control group has been designed to detect, quantify, and treat prevalent pre-cancers prior to initiation of follow-up. This sweep is being performed to maximize detection and treatment of prevalent cervical precancers, and thereby to maximize the likelihood that disease diagnosed during follow-up among both the CVT and new UCG groups represent disease that is incident since enrollment into LTFU.

This stringent “sweep” will consist of an initial screening visit that will include both cytology and hybrid capture II HPV test (HC II) (see Table 1 for visit window information). If both tests are negative women will be followed at 2 years intervals. All women with cytological evidence of pre-cancer (i.e. High grade squamous intraepithelial lesion (HSIL)/Cancer, abnormal squamous cell of unknown significance that suggest high grade lesion (ASC-H) or glandular lesion) will be referred to colposcopy for evaluation and treatment as defined by the clinician and in consultation with the participant. HPV positive women and women with minor cytological abnormalities (i.e. Low grade squamous intraepithelial lesion (LSIL) or Abnormal squamous cell of unknown significance (ASCUS)-HPV+) will have a second round of “accelerated screening” (visit L06) about 6 months following the first screen (see Figure 1). Inadequate cytology or HCII result will be considered equivalent to a positive result for purposes of clinical management. At the second screening visit about six months later, both cytology and HPV HCII testing will be performed. If both tests are negative, the participant will revert to routine follow-up every 2 years. If either test is positive, she will be referred to colposcopy for evaluation and treatment as defined by the clinician and in consultation with the participant (see Figure 1).

Also, to ensure that cervical precancers diagnosed and treated prior to study enrollment are captured, women in UCG will be asked about cervical disease detected and treated before the enrollment in the LTFU study and medical charts and/or registry information will be reviewed to confirm diagnoses.

The initial “sweep” and the identification of end points detected and treated at or before the enrollment in the LTFU study will help us determine the number of prevalent endpoints in the unvaccinated control group, and therefore to consider as incident infection and disease only those events that occur during the follow-up phase of LTFU (visit L24, conducted at about 24 months after enrollment, and beyond). Please see Table 2 for details on specimen collection.

### **3.3.3 Follow-up**

#### **3.3.3.1. Regular screening (two year intervals)**

All women enrolled in the LTFU study will be followed at two year intervals for up to six years. Women who were vaccinated with the HPV-16/18 vaccine at the start of CVT and lived in the Guanacaste province and a few areas of Puntarenas closest to Guanacaste will be followed for six years; women who comprised the control arm during CVT, who are offered the HPV-16/18 vaccine at crossover and lived in the Guanacaste province and a few areas of Puntarenas closest to Guanacaste will be followed for two years. Screening once every 2 years will allow for the ascertainment of virological and clinical outcomes important for evaluating long-term vaccine efficacy, as well as the natural history of HPV infections and cervical pre-cancers (i.e., persistent HPV infections and high grade CIN) among the UCG. Follow-up for two years for the control arm vaccinated with HPV-16/18 vaccine at crossover will allow for additional vaccine safety monitoring and maximization of detection of persistent infections and lesions resultant from HPV exposure that occurred before cross-over to the HPV vaccination. After the two years, their results will be evaluated and recommendation for continuing cervical screening will be given; if necessary, they will receive an additional screening visit six months later or will be refer for colposcopy evaluation. According to the results at the additional screening visit these women will be either referred to colposcopy or will be recommended to continue their cervical screening out of the study. (see section 3.3.3.4) It will be the CVT arm that was vaccinated with the HPV vaccine at the start of CVT that will be followed for the

full ten years. Screening at this lengthened interval is appropriate for participants in the CVT trial since they have been screened extensively for 4 years and are free of significant disease at the start of the LTFU period. Also, women of the UCG will be exhaustively screened through the “sweep” phase described above and will be free of disease at the end of this phase as well. It should be noted that screening once every two years is also consistent with Costa Rican recommendations/standard of care (see Table 1 for details on visit windows).

If cytology is negative, women will continue in regular screening until the end of the study (HPV HC II negative ASCUS is considered a “negative” result). If minor cytological abnormalities are detected, they will be referred to accelerated screening (see next section for details) and if precancer/cancer is detected through cytology results they will be referred to colposcopy (see section 3.3.3.3).

#### **3.3.3.2. Accelerated screening (six month intervals)**

Women with minor cytological abnormalities (LSIL or HPV-positive ASCUS) will be referred to accelerated screening where they will be evaluated at approximately six months. At this six month visit, cytology and HCII HPV will be performed, and if both tests are negative, the woman will revert to regular screening every 2 years. If cytology is abnormal she will be referred to colposcopy and if cytology is within normal limits but the HPV test is positive she will remain in accelerated screening. At the second accelerated screening visit if both cytology and HPV HCII tests are negative, she will revert to regular screening every 2 years and if any of them is positive she will be referred to colposcopy (see Figure 2). If at any point precancer/cancer is detected through cytology, the woman will be referred to colposcopy.

#### **3.3.3.3. Colposcopy**

To assure prompt treatment of precancerous lesions of study participants, women with cytological evidence of cytological ASC-H, HSIL/cancer or glandular lesion by cytology, with visual abnormalities suggestive of cancer, or with evidence of persistent infection/lesions will be referred for colposcopic evaluation where proper treatment will be defined by the clinician, in consultation with the participant. With the implementation of the fourth amendment to this protocol, HPV testing with 16/18/45 genotyping

will be used for colposcopy referral at the last approved screening visit in accordance with recent updates to US screening guidelines.

Women referred for colposcopic evaluation (regardless of treatment) will continue to be followed actively throughout the six-year LTFU period to assure adequate clinical management. After release from colposcopy these women will be followed either at six-month intervals (accelerated screening) or at two year intervals at the clinician's discretion.

**3.3.3.4. Clinical management for women from the original control arm who are not part of the immunogenicity sub-cohort at their last study visit**

The 2 year visit (L24) is the last follow-up visit for women in the original control arm who are not part of the ISC (see section 3.3.3.5). To assure that women exiting the long term follow up protocol have a very low risk of developing significant cervical disease for several years, we plan to refer more women to colposcopy. At their last CVT visit women went through a very strict management algorithm that considered all the results, including their type specific HPV to determine if according to their risk of cervical disease they required further accelerated follow-up or colposcopic evaluation; therefore at the 2 year visit CVT women will be at low risk of disease.

Women in the biannual follow up regime at the time of their L24 visit will have a cytology performed, if the result is normal (including ASC\_US with a negative HPV result) they will be exited from the study with a recommendation to continue cervical screening. If the cytology reports low grade lesion (including ASC\_US with a positive HPV result) the participant will be invited to an additional screening visit six months later. If the cytology reports a high grade lesion she will be referred for colposcopic evaluation.

Women who at the time of their 2 year visit are in the accelerated screening folder (every six months) will have cytology and HPV test by hybrid capture 2 (HC2) performed. If the cytology is normal (including ASC\_US with a negative HPV result) and HC2 is negative, the participant will be exited from the study with a recommendation to continue cervical screening. If the cytology is normal but HC2 is positive and it

is the first 6 month screening visit (Six month folder type A) the participant will be invited to an additional screening visit six months later. If the visit is the second 6 month visit (six month folder type B) the participant will be referred to colposcopy; finally if the cytology is abnormal the participant will be referred to colposcopy independently of the type of the six month folder. Women in colposcopy at the time of their 2 year visit will continue in colposcopy until it is decided that they can be released from colposcopy and can continue their cervical screening out of the study. (See figure 3)

At the additional screening visit women will have cytology and HPV testing by HC2 performed. If cytology is normal (including ASC\_US with a negative HPV result) and HC2 is negative the participant will be exited from the study with a recommendation to continue cervical screening. If either the cytology is abnormal or the HPV test is positive the participant will be sent for colposcopic evaluation. (see figure 4).

All women sent for colposcopic evaluation will remain in the study until it is considered that there is no residual cervical disease.

#### **3.3.3.5. Immunogenicity sub-cohorts**

During the CVT and the study crossover phase, specific groups of women were invited to be part of an immunogenicity sub-cohort. These women had extra clinic visits and extra blood samples collected to allow us to study in detail the pattern of immune response to the vaccine and to the disease itself. We plan to continue following some of these women and to collect extra blood samples at the regular screening visits during the LTFU; oral samples will be collected on a subset as well. The groups of women who comprise the LTFU immunogenicity sub-cohort and who we plan to follow are:

- Crossover phase immunogenicity sub-cohort: Approximately 600 women initially randomized to receive the active control during the CVT, who will receive HPV vaccine during the crossover phase of the CVT and lived in the Guanacaste province and a few areas of Puntarenas closest to Guanacaste will have an extra visit with blood collection one month after the third vaccine dose. They will be asked also to provide extra blood samples for immunogenicity studies during the crossover HPV vaccination visits; for this group only, we will collect oral samples as well. These women will also be asked to participate in the full six years of long-term follow-up, as opposed to

all other women initially in the control arm of CVT who live in the Guanacaste province and a few areas of Puntarenas closest to Guanacaste.

- 10% random sample: A 10% random sample of women enrolled in the CVT was selected using the last digit of her individual identification number. These women gave extra blood samples for immunogenicity studies at their enrollment, 12 month and 36 month visits during the CVT. We plan to follow those women that were part of this group who lived in the Guanacaste province and a few areas of Puntarenas closest to Guanacaste. A comparable random sample of 10% of women in the UCG will also be selected and included in the immunogenicity subcohort. We will collect extra blood samples from these women. [NOTE: As of March 2013, per local IRB approval, a sufficient number of extra blood samples were collected to fulfill study objectives, and collection of these samples was suspended.]
- We will collect additional blood samples for immunogenicity studies from women who had a tissue collected during a colposcopy visit to study immune responses at the time of disease detection. [NOTE: As of March 2013, per local IRB approval, a sufficient number of extra blood samples were collected to fulfill study objectives, and collection of these samples was suspended.]

The extra samples to be collected on these groups of women are described in sections 3.4.3 and 3.4.4.

### **3.3.3.6 Last approved screening visit (L72)**

For the last approved screening visit (L72), we request approval to implement cytology and HPV co-testing. The aim is to provide a very sensitive screening strategy, recommended by US guideline committees for the diagnosis of cervical precancer and cancer (CIN2+). Sensitive screening is especially important for study participants when completing the last approved screening visit. Co-testing, as determined by evidence-based consensus guidelines and results from studies involving over a million women around the world [34; 37; 38], is recommended as the most sensitive method for cervical cancer screening, and is preferred over cytology alone for women 30 years and older. While co-testing has not been proven to be cost-effective, the increase in sensitivity over HPV testing alone as a primary screen, warrants its use during the last approved screening visit of the study. Although accepted internationally



as a most sensitive screening strategy, co-testing has not yet been officially implemented in Costa Rica. Therefore there are no local clinical management guidelines for this particular screening strategy. Consequently, we are proposing that results from both tests be evaluated according to the Screening Guidelines for the Prevention and Early Detection of Cervical Cancer of the American Cancer Society (ACS), American Society of Colposcopy and Cervical Pathology (ASCCP) and American Society of Clinical Pathology (ASCP) [34]. These guidelines provide age-appropriate management of screening results to prevent cervical cancer by incorporating high-risk HPV detection along with cervical cytology for women 30-65 years old.

The study cohort still includes a portion of participants younger than 30 years old. Recent evidence from the ATHENA study [36] showed that 34% of CIN3+ cases were found among women 25-29 years of age. More than half the women 25-29 years old with CIN3+ had a negative cytology result, and the extension of HPV screening with 16/18 genotyping to women 25-29 years, as compared with older women, caused an increase in colposcopy visits but a matching increase in detection of CIN3+. Thus, with the intent of being more cautious than the Screening Guidelines and taking into consideration that the L72 visit might be the last approved screening visit within this study, we are proposing to extend co-testing for our younger participants as well. Co-testing is currently practiced for this same age group in some large centers in the US (e.g., Kaiser Permanente Northern California) and some recommend that it be the preferable screening method when sensitivity is paramount [39]. Again, by screening concomitantly with high-risk HPV testing, 16/18/45 genotyping and cytology, each of our younger participant's precancer/cancer risk estimate will be precise, permitting optimal definition of their subsequent follow-up needs. In case further follow up is warranted due to the results of this visit for any of our participants regardless of age, an additional visit (LX) will be implemented and those requiring it will be asked to attend after appropriate informed consent (see section 3.5 below).

#### **3.4. Clinic Visits During Long Term Follow Up**

At all clinic visits, a risk factor questionnaire will be administered by trained interviewers (Attachment 4). Clinic staff will also ask questions about adverse events and pregnancies occurring after the last visit, and

responses will be documented (see section 3.7). Specimen collection (as listed in Table 2) will be performed by trained clinic staff. Some oral and blood samples will be collected only on the subset of women selected for the immunogenicity subcohort (as described in 3.4.3 and 3.4.4).

The participant can opt out of any of the components of LTFU at any point if she desires, with one exception: the pelvic exam and cervical cell collection are a requirement for sexually active women from the UCG at the initial enrollment visit.

#### **3.4.1. Risk Factor Interview Questionnaires**

To gather information regarding HPV exposure risk (i.e. sexual behavior) and other socio-demographic, behavioral and exogenous factors that are either believed to be associated with the development of squamous intraepithelial lesions (SIL) or thought to potentially modulate the immune response, a brief questionnaire will be administered at all routine visits. The questionnaire will obtain information on socio-demographic factors, sexual history, reproductive behavior, contraceptive practices and cigarette smoking (Attachment 4).

#### **3.4.2. Pelvic Exams**

At each visit, a pelvic examination will be performed on all sexually experienced women. In addition to clinical inspection, the following biological specimens will be collected at the time of each pelvic examination:

- Cervical secretions (for immune marker measurements and other research tests)
- Cervical cells stored into Preservcyt (PC) media (for cytology, HPV DNA testing, and other research tests that may be performed on a subset of women)
- Cervical cells stored into storage media (to allow for RNA-based testing and to evaluate viral expression levels)

#### **3.4.3. Blood Collection**

Blood specimens will also be collected from all participants at each of the clinic visits. The major purpose of these blood collections will be to monitor immune response to vaccination, both humoral (i.e., antibody)

and cell-mediated (i.e., T-cells). Aliquots of plasma, serum, buffy coat, peripheral blood mononuclear cells (PBMCs) and red blood cells (RBCs) will also be saved for other research-based assays, including antibody tests against sexually transmitted diseases other than HPV, hormone assays, nutritional assays (particularly those nutrients believed to impact the immune response), host DNA testing (to evaluate host susceptibility factors associated with SIL and the immune response to vaccination), and others. [NOTE: As of March 2013, per local IRB approval, a sufficient number of blood samples for PBMCs were collected to fulfill study objectives, and collection of these samples was suspended.]

Four types of blood draws are planned. These include the collection of 20-30 mL of blood that will be kept cool after collection and processed locally within hours of collection, and the collection of an additional 40 mL of blood on a subset of participants that will be kept at room temperature and sent to a specialized laboratory set up to cryopreserve viable lymphocytes. The 20-30 mL blood draw will be collected from all participants at all clinic visits (30 mL at CVT V48 for women who enroll in LTFU, and L48; 20ml at UCG enrollment, L24, L72 and extra screening visits) and will be used for HPV antibody, immunological, host DNA, hormonal, nutritional, and other research-based assays. The 40 mL blood draw will be collected to allow for cryopreservation of PBMCs required to perform functional immunological testing planned as part of efforts by NCI and Costa Rican investigators to monitor the immune response of study participants. This sample will be collected for research purposes on a subset of participants, women who are referred for colposcopic evaluation and require a biopsy or LEEP (one sample for each colposcopy cycle, if possible at the first tissue collection visit), and women in the immunogenicity subcohort of the Crossover study as well as a random sample of women from CVT and UCG (see section 3.3.3.4 for a detailed description of these groups). While the primary focus of this extra blood draw will be on the cryopreservation of PBMCs for immunological monitoring, residual plasma will also be saved for use in possible future assays. [NOTE: As of March 2013, per local IRB approval, a sufficient number of blood samples for PBMC cryopreservation were collected to fulfill study objectives, and collection of these samples was suspended.] To assure that participation and retention rates in our study are not negatively affected by the blood draws, refusal to have blood collected will not result in exclusion from the study.

#### **3.4.4. Oral Specimen Collection**

Women in the immunogenicity sub cohort during the crossover phase will be asked to provide three additional saliva specimens at all scheduled visits: the first specimen will be collected by trained staff using the same type of sponge used to collect the cervical secretions. The second specimen will consist of saliva placed directly into an appropriate storage vial. Both specimens will be used to evaluate the local immune response and to compare this response to those observed at the cervix and in blood. The third specimen will be an oral rinse specimen collected in mouthwash. This will be used for HPV DNA determination for research purposes, as well as other research tests, and will allow us to assess whether oral HPV antibody levels are being explained by current oral HPV infection. The oral rinse sample will be collected from all women at the last regular screening visit, L72, for assessment of long-term vaccine efficacy at this anatomic site.

### **3.5. Referral to additional study visit (LX) or colposcopy after L72**

As mentioned above, in preparation for the participants' completion of the currently approved screening visits, and aiming to provide a maximally sensitive screening strategy, we propose the addition of HPV testing to cytology (co-testing) at the last approved regular screening visit (L72). The results from both tests will be considered for clinical management according to the Screening Guidelines for the Prevention and Early Detection of Cervical Cancer [34].

Participants whose results from the last approved screening visit (L72) are abnormal, or participants in the accelerated follow-up (6 month follow-up) who do not complete their last approved screening visit (L72), will be asked to attend another visit for co-testing (LX visit) and/or will be referred to colposcopy (Figure 5). This protocol will assure a very low risk of developing cervical cancer for several years after completion of L72. In other words, this additional visit or referral to colposcopy, is intended to provide a safety net for women with an abnormal cervical screening history or set of recent results. Individual case review by the study clinical experts will be also conducted for specific cases (Figure 5) to determine the best course of action as well as a suggested a follow-up plan after L72.

The LX visit will be similar to other regular visits. In brief, during the LX visit, the study risk factor questionnaire will be administered to all participants, a pelvic examination will be performed, and cervical

cells will be collected for cytology and HPV DNA testing as well as for storage in preserving media to allow for RNA-based testing and to evaluate viral expression levels. Blood specimens will be collected to monitor immune response to vaccination and for other research-based assays, including hormone assays, nutritional assays (particularly those nutrients believed to impact the immune system), host DNA testing (to evaluate host susceptibility factors associated with cervical lesions and the immune system response to vaccination) and others.

**Windows During the LTFU**

|                            | <b>Earliest Possible Date</b>               | <b>Last Possible Date</b>               |
|----------------------------|---------------------------------------------|-----------------------------------------|
| <b>UCG 24 month folder</b> |                                             |                                         |
| L0                         | Recruitment start                           | 31-Dec-2014                             |
| L24                        | Date of enrollment + 661                    | Date of enrollment + 1380               |
| L48                        | Date of enrollment + 1381                   | Date of enrollment + 2100               |
| L72                        | Date of enrollment + 2101                   | Date of enrollment + 2820               |
| LX                         | Date L72 completed + 305                    | Date L72 completed + 670                |
| <b>UCG 6 month folder</b>  |                                             |                                         |
| L0                         | Recruitment start                           | 31-Dec-2014                             |
| L6                         | Date of enrollment + 121                    | Date of enrollment + 300                |
| L12                        | Date of enrollment + 301                    | Date of enrollment + 480                |
| L18                        | Date of enrollment + 481                    | Date of enrollment + 660                |
| L24                        | Date of enrollment + 661                    | Date of enrollment + 840                |
| L30                        | Date of enrollment + 841                    | Date of enrollment + 1020               |
| L36                        | Date of enrollment + 1021                   | Date of enrollment + 1200               |
| L42                        | Date of enrollment + 1201                   | Date of enrollment + 1380               |
| L48                        | Date of enrollment + 1381                   | Date of enrollment + 1560               |
| L54                        | Date of enrollment + 1561                   | Date of enrollment + 1740               |
| L60                        | Date of enrollment + 1741                   | Date of enrollment + 1920               |
| L66                        | Date of enrollment + 1921                   | Date of enrollment + 2100               |
| L72                        | Date of enrollment + 2101                   | Date of enrollment + 2820               |
| LX                         | Date of enrollment + 2821                   | Date of enrollment + 3185               |
|                            | <b>Earliest Possible Date<sup>1,3</sup></b> | <b>Last Possible Date<sup>2,3</sup></b> |
| <b>CVT 24 month folder</b> |                                             |                                         |
| L0                         | N/A                                         | 31-Dec-2014                             |
| L24                        | Date V48 completed in CVT + 661             | Date V48 completed in CVT + 1380        |
| L48                        | Date V48 completed in CVT + 1381            | Date V48 completed in CVT + 2100        |
| L72                        | Date V48 completed in CVT + 2101            | Date V48 completed in CVT + 2820        |
| LX                         | Date L72 completed + 305                    | Date L72 completed + 670 <sup>9</sup>   |
| <b>CVT 6 month folder</b>  |                                             |                                         |
| L0                         | N/A                                         | N/A                                     |
| L6                         | Date V48 completed in CVT + 121             | Date V48 completed in CVT + 300         |
| L12                        | Date V48 completed in CVT + 301             | Date V48 completed in CVT + 480         |
| L18                        | Date V48 completed in CVT + 481             | Date V48 completed in CVT + 660         |
| L24                        | Date V48 completed in CVT + 661             | Date V48 completed in CVT + 840         |
| L30                        | Date V48 completed in CVT + 841             | Date V48 completed in CVT + 1020        |
| L36                        | Date V48 completed in CVT + 1021            | Date V48 completed in CVT + 1200        |
| L42                        | Date V48 completed in CVT + 1201            | Date V48 completed in CVT + 1380        |
| L48                        | Date V48 completed in CVT + 1381            | Date V48 completed in CVT + 1560        |
| L54                        | Date V48 completed in CVT + 1561            | Date V48 completed in CVT + 1740        |
| L60                        | Date V48 completed in CVT + 1741            | Date V48 completed in CVT + 1920        |
| L66                        | Date V48 completed in CVT + 1921            | Date V48 completed in CVT + 2100        |
| L72                        | Date V48 completed in CVT + 2101            | Date V48 completed in CVT + 2820        |
| LX                         | Date V48 completed in CVT + 2821            | Date V48 completed in CVT + 3175        |

<sup>1,2</sup> NOTE: Date of V48 completed in CVT will be substituted by July 05,2012 for the newly incorporated group of women with fewer than three and three doses of the HPV vaccine.

<sup>3</sup> NOTE: In cases where V48 was not completed but the substitute visit LB was, the date of LB was used for these window definitions.

Figure 1

**Colposcopy referral algorithm for sweep**

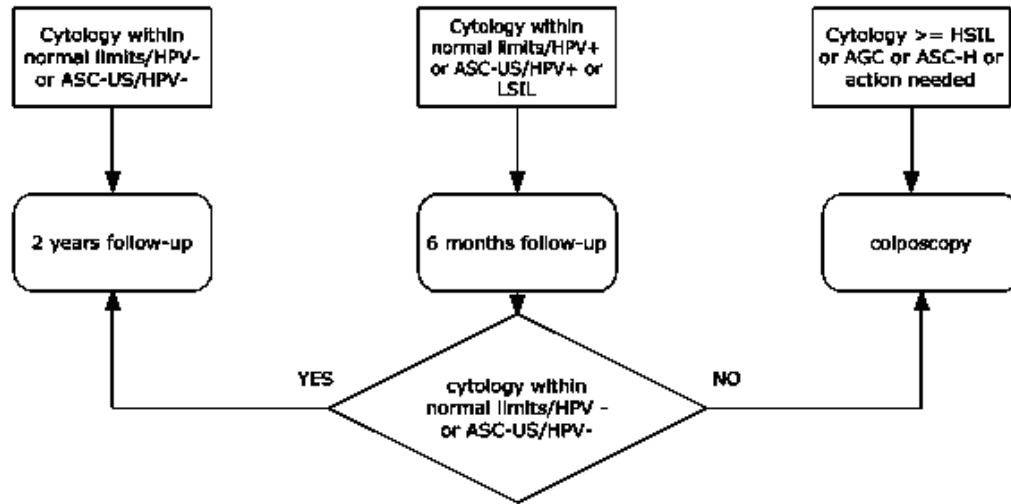

Figure 2

Colposcopy referral algorithm during the follow up phase of LTFU study prior to L72

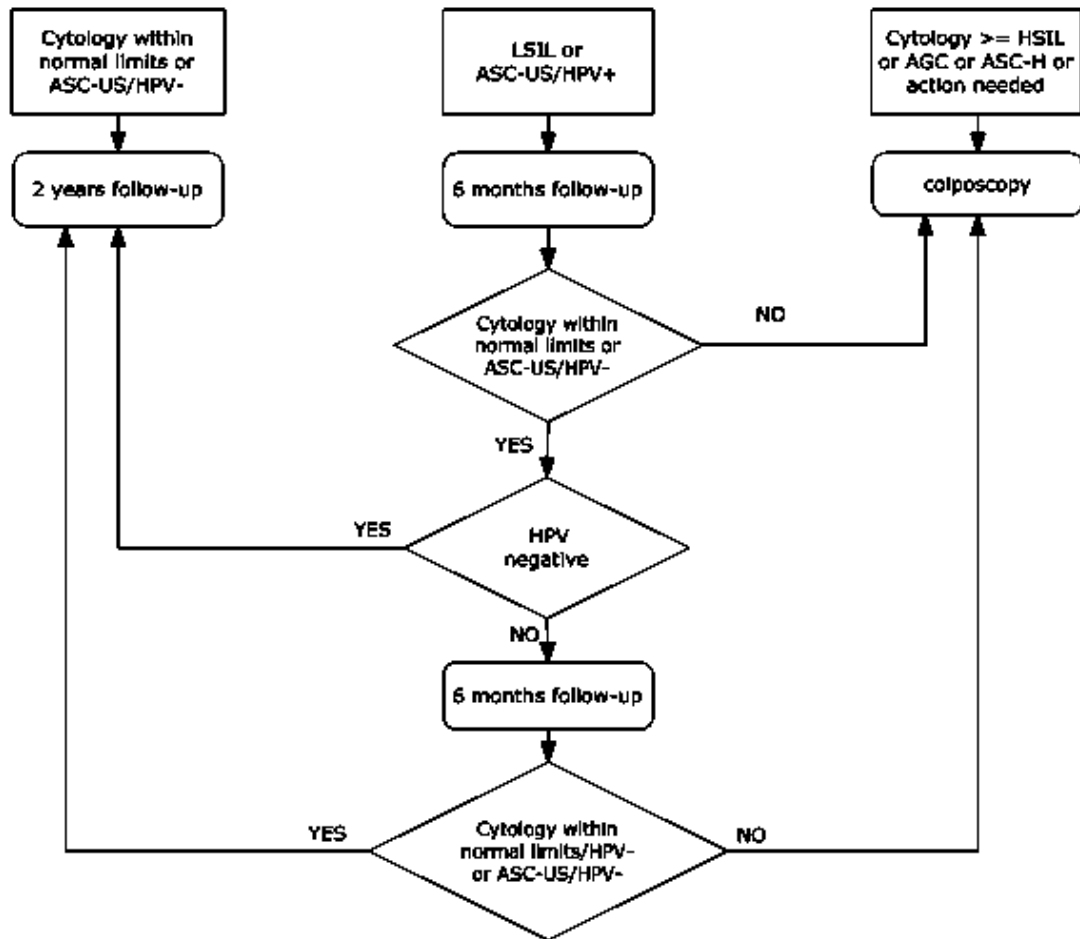



Figure 3

**Colposcopy referral algorithm for former (CVT) control arm participants not part of ISC  
at the 2 year visit (Visit L24).**

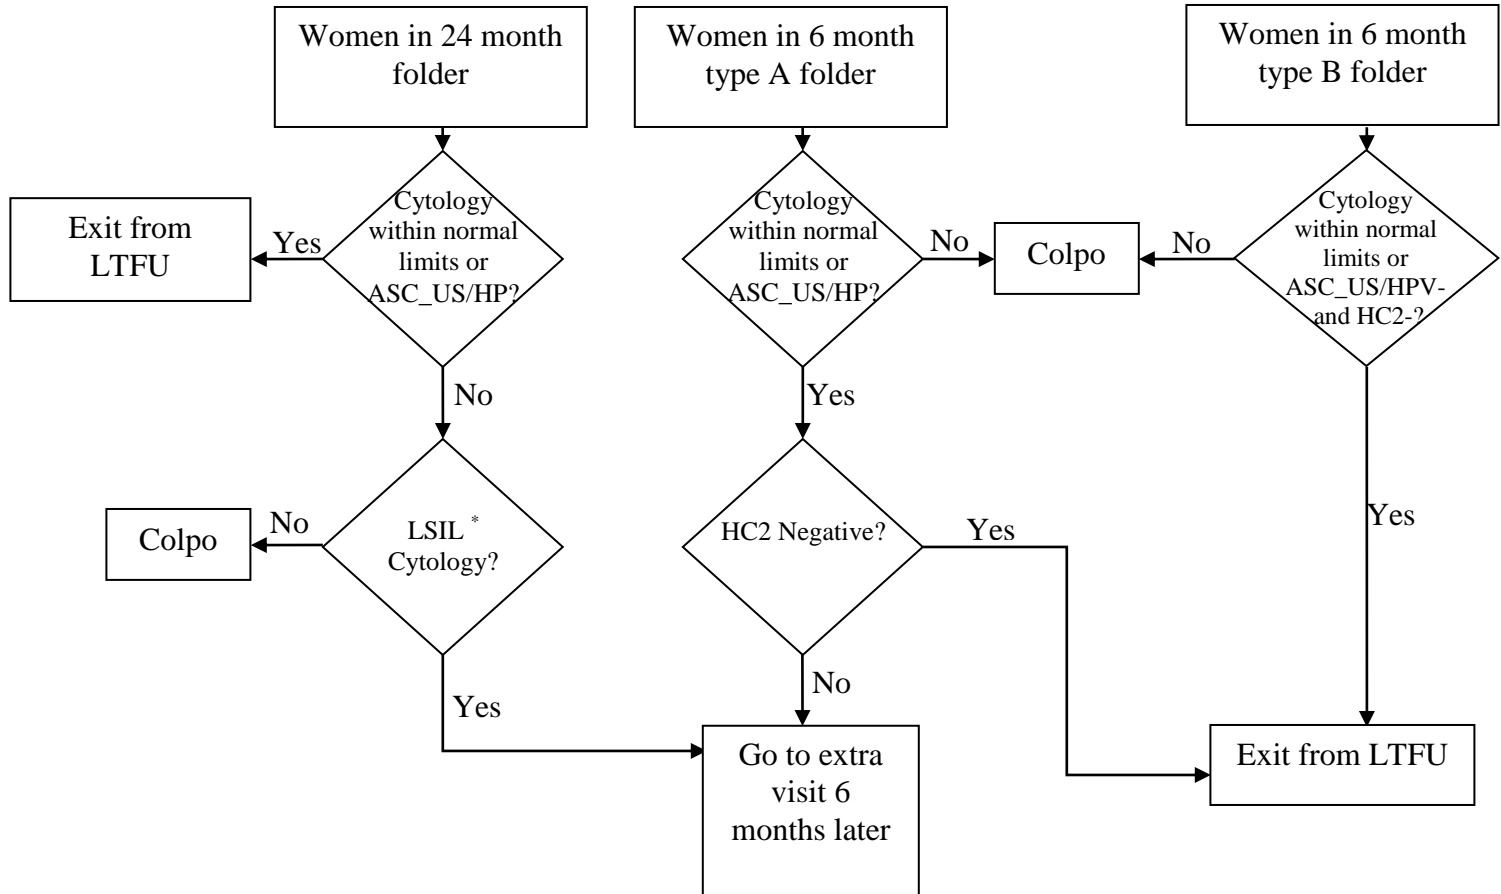

\*LSIL includes LSIL results and ASC-US with a positive HPV result by HC2 in the same sample.

Figure 4

**Colposcopy referral algorithm for former (CVT) control arm participants not part of ISC who attends the extra screening visit due to the results at the 2 year visit.**

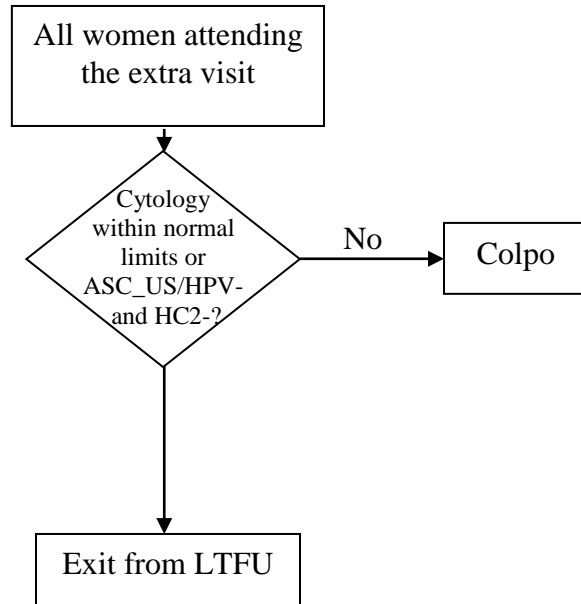

Figure 5

**Colposcopy referral algorithm for last approved visit, L72**

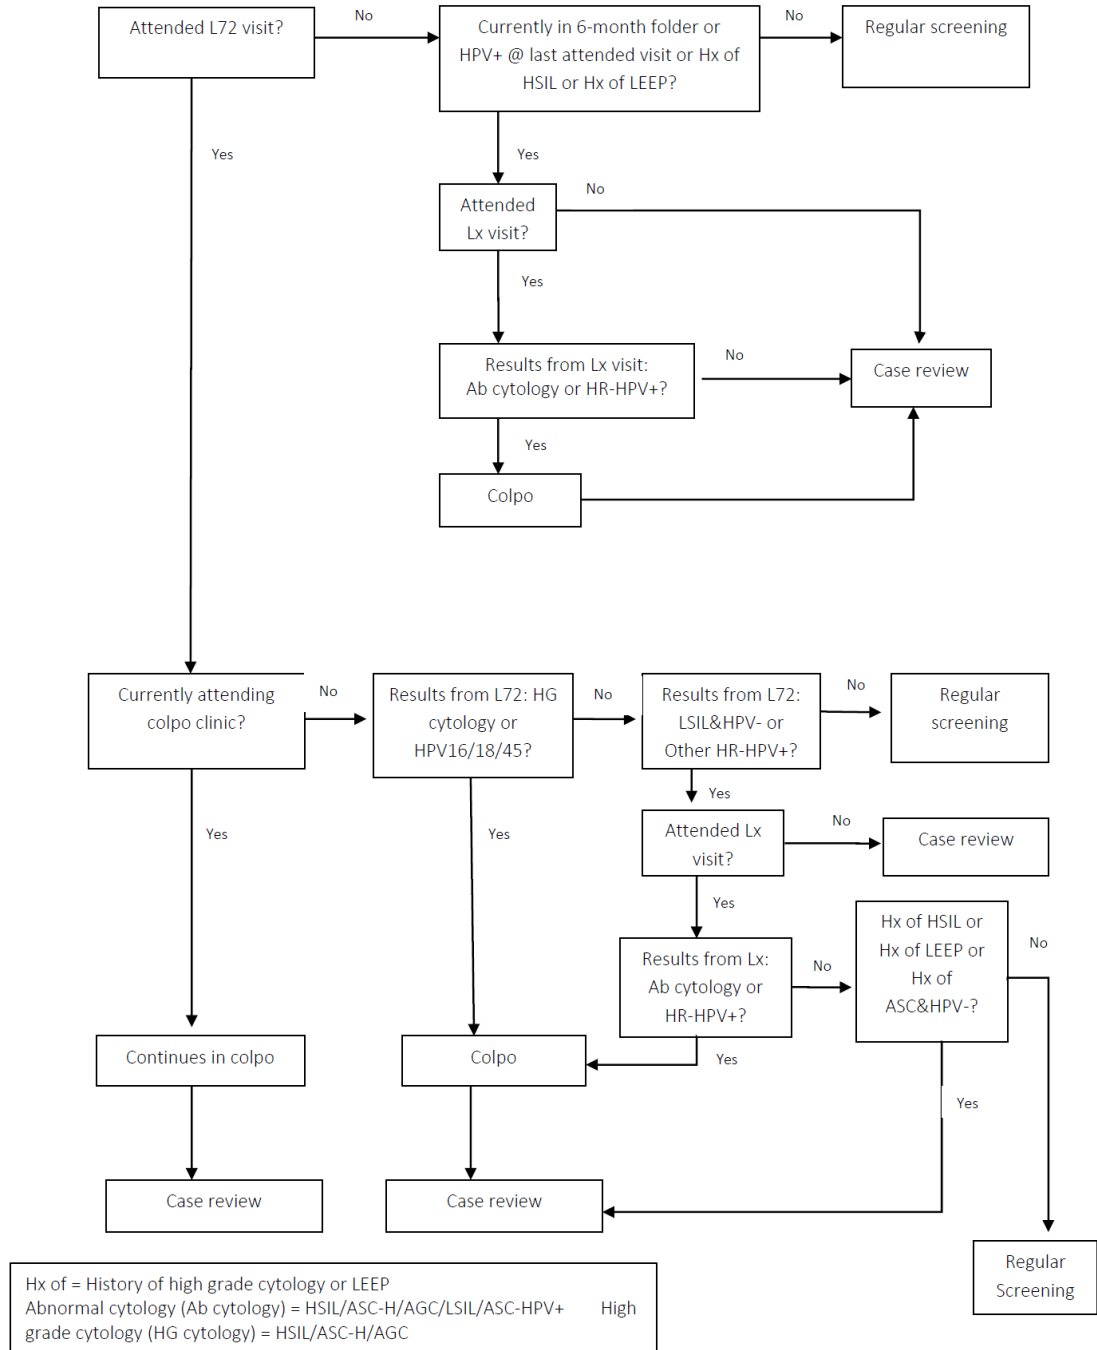

**Table 2** Sample Collection and General Procedures during Long Term Follow Up (LTFU) Study

| Timing of Home Visit/Office Visit/Contact                                | CVT | Sweep UCG        |                       | Follow-up                       |                                                   |                            | Colposcopy   |                   |
|--------------------------------------------------------------------------|-----|------------------|-----------------------|---------------------------------|---------------------------------------------------|----------------------------|--------------|-------------------|
|                                                                          |     | Enrollment Sweep | Sweep 2 (HPV+ & LSIL) | 6/8/10-yr visits (L24/L48/L72)^ | Extra screening visits (for women with low-grade) | Additional visit after L72 | Colpo visits | Post-colpo visits |
| Informed consent                                                         | ● ‡ | ●                |                       |                                 | ● △                                               |                            |              |                   |
| Check eligibility (inclusion/exclusion/deferral) criteria                |     | ●                |                       |                                 |                                                   |                            |              |                   |
| Interview (Questionnaire)                                                | ● ∞ | ●                |                       | ●                               | ●                                                 | ●                          |              |                   |
| Medical history                                                          |     | ●                |                       |                                 |                                                   |                            |              |                   |
| Interim medical history including the monitoring of SAEs and pregnancies | ● ∞ |                  | ●                     | ●                               | ●                                                 | ●                          | ●            | ●                 |
| Blood Sampling:                                                          |     |                  |                       |                                 |                                                   |                            |              |                   |
| Yellow top (10 mL)                                                       | ● ∞ | ●                |                       | ● (L48 visit only)              |                                                   |                            | ● ††         | ● ††              |
| Red top (10 mL)                                                          | ● ∞ | ●                | ●                     | ●                               | ●                                                 | ●                          | ● ††         | ● ††              |
| Green top (40 mL)                                                        |     | ● *              |                       | ● ** †                          |                                                   |                            | ● *** †      | ● *** †           |
| Lavender Top (4mL)                                                       | ●   | ●                | ●                     | ●                               | ●                                                 | ●                          | ● ***        | ● ***             |
| Pelvic Exam †                                                            | ● ∞ | ●                | ●                     | ●                               | ●                                                 | ●                          | ●            | ●                 |
| Cervical Sampling: †                                                     |     |                  |                       |                                 |                                                   |                            |              |                   |
| Collection of secretions for research                                    | ● ∞ | ●                | ●                     | ●                               | ●                                                 | ●                          | ● ††         | ● ††              |
| Collection of cervical cells into PC                                     | ● ∞ | ●                | ●                     | ●                               | ●                                                 | ●                          | ● ††         | ● ††              |
| Collection of cervical cells into storage media                          | ● ∞ | ●                | ●                     | ●                               | ●                                                 | ●                          | ● ††         | ● ††              |

| Timing of Home Visit/Office Visit/Contact | CVT | Sweep UCG        |                       | Follow-up                       |                                                   |                            | Colposcopy   |                   |
|-------------------------------------------|-----|------------------|-----------------------|---------------------------------|---------------------------------------------------|----------------------------|--------------|-------------------|
|                                           |     | Enrollment Sweep | Sweep 2 (HPV+ & LSIL) | 6/8/10-yr visits (L24/L48/L72)^ | Extra screening visits (for women with low-grade) | Additional visit after L72 | Colpo visits | Post-colpo visits |
| Oral Sampling:                            |     |                  |                       |                                 |                                                   |                            |              |                   |
| Spit                                      |     |                  |                       | ●****                           | ●****                                             |                            | ●††          | ●††               |
| Oral sponges                              |     |                  |                       | ●****                           | ●****                                             |                            | ●††          | ●††               |
| Mouthwash                                 |     | ●†               |                       | ●**** †††                       | ●****††                                           |                            | ●††          | ●††               |
| Anal Sample                               |     | ●†               | ●                     | ●(only visits L24 and L72)      | ●(only visits L6, L12, L18)                       |                            | ●††          | ●††               |
| Visual Image Collection                   |     |                  |                       |                                 |                                                   |                            | ●            | ●                 |
| Histological Tissue collection            |     |                  |                       |                                 |                                                   |                            | ●¥           | ●¥                |

● is used to indicate a study procedure that requires documentation in the individual study form

‡ Women from CVT will be allowed to sign the IC at the CVT 48 month visit and also at CVT-colposcopy, safety protocol-colposcopy or crossover visits

∞ Samples and data collected as part of the CVT protocol that are time comparable with samples and data collected from women in the UCG at enrollment

\*This sample will be collected on a random sample of women from the UCG

\*\* This sample will be collected on the subset of women enrolled in the immunogenicity subcohort during Crossover and on a random sample of women from the UCG and the CVT

\*\*\* This blood draw will be performed on women who have a histological tissue collection at colposcopy.

\*\*\*\* This sample will be collected on the subset of women enrolled in the immunogenicity subcohort during crossover and at L24 on women positive for oral HPV at the last CVT visit

† Procedure will not be performed on virginal women.

†† Samples to be collected at the investigator discretion.

††† This sample will be collected from all women at visit L72.

¥ Will be performed if indicated by the case management and doctor criterion

^ Visits 8 and 10 only apply to CVT women vaccinated with the HPV vaccine at the start of CVT who lived in the Guanacaste province and a few areas of Puntarenas closest to Guanacaste, UCG women and women in the immunogenicity subcohort

‡ Only applies to women recruited on or after protocol amendment 1 approval

△ Addendum to ICF to inform on exit strategy and possible extra screening visit LX

∫ suspended on March 2013 per local IRB approval due to enough specimens collected to fulfill study objectives; samples will not be collected at L72

### **3.6. Biospecimen processing, storage and shipment**

All specimens will be collected by trained staff following standard procedures. Most of the specimens we plan to collect require little or no processing but need to be frozen on the day of collection. These include the cervical cells and secretions.

Cervical cells for cytology and HPV tests (HCII and/or other method) are collected in PreservCyt medium and kept at room temperature after collection. Aliquots for the HPV PCR test are prepared and frozen, and the remaining sample is used for cytology preparation and HPV testing; if there is remaining sample it is also kept at room temperature.

Blood from the 20-30 mL collection needs to be separated and stored frozen in its components, on the same day of collection. The additional blood specimen collected from women in the immunogenicity sub cohort will be kept at room temperature until separated into plasma and PBMCs and frozen within 24 hours. [NOTE: As of March 2013, per local IRB approval, a sufficient number of blood samples for PBMC cryopreservation were collected to fulfill study objectives, and collection of these samples was suspended.]

Saliva specimens from women in the immunogenicity subcohort do not require processing but need to be frozen after collection. Oral samples collected in mouthwash are kept cool, and after the aliquoting process, are frozen.

Tissue samples collected at colposcopy will be fixed in formalin and kept at room temperature until processed to produce paraffin embedded blocks and slides. Slides as well as remaining blocks will be kept at room temperature.

The PBMC cryopreservation process as well as all the processing of the samples will be described in study-specific SOPs. Following the study-specific SOPs, all biological specimens will be stored at the repository located in Liberia and periodically shipped to one of the NCI repositories for long-term storage and testing (at NCI or collaborating laboratories).

### **3.7. Laboratory Tests**

#### **3.7.1. Testing for Clinical Management**

##### **3.7.1.1. Cytology**

Cervical cytology will be performed using the *ThinPrep PapTest*<sup>™</sup> (Cytoc Corporation, Boxborough, MA, USA). Cervical cells for *ThinPrep* cytology will be collected at each clinic visit where a pelvic exam is performed using a Cervex® brush (Rovers Medical Devices BV, Oss, The Netherlands) rinsed into a collection vial containing *PreservCyt* medium. Two 0.5 mL aliquots from the 20 mL of *PreservCyt* vial will be withdrawn for HPV PCR testing (see below), prior to preparation of *ThinPrep* slides. *ThinPrep* slides will be prepared by qualified study staff at the local cytology staining laboratory, will be screened sequentially by two cytotechnologists specifically trained to screen *ThinPrep* slides, and will be interpreted by the Costa Rican study cytopathologist, using the Bethesda 2001 classification system.

The clinical management of the study participants will rely on the Costa Rican cytopathology interpretation, with the exception of HSIL noted below. As part of NCI's ongoing quality control efforts, all slides that read as abnormal in Costa Rica and a 5% sample of the slides read as negative in Costa Rica will be re-screened and re-interpreted in the United States. The purpose of this review is to maximize the accuracy of the Costa Rican interpretations and the comparability of the Costa Rican readings to a US standard, realizing nonetheless that cytopathology is inherently and unavoidably subjective to some extent and that there is no absolute reference standard of cytopathology, particularly for equivocal interpretations such as ASC-US.

Yearly evaluations will be conducted on the agreement between Costa Rica and US cytology results and if necessary the QC cytology plan will be modified.

The cytological interpretation given by the Costa Rican cytopathologist will be used in clinical management, with one exception. In cases where the Costa Rican interpretation is <HSIL and the US interpretation is HSIL or more severe disease, the interpretation from the US will be communicated to Costa Rica, and will lead to colposcopic referral if necessary. For clinical management purposes, should *ThinPrep* slides be inadequate for interpretation, the subject will be managed as if she were LSIL positive, rather than delay management by recall of the patient for repeat cytology.

#### **3.7.1.2. Histology**

Biopsy and excisional treatment (loop electrosurgical excisional procedure, or LEEP) specimens obtained during the study will be fixed in buffered formalin, and sent to the Costa Rican pathologist, for processing and diagnosis. LEEP specimens will be sectioned extensively. The diagnosis made by the Costa Rican pathologist will be used to determine clinical management of participants.

In addition to the Costa Rican diagnosis, a US pathologist with expertise in cervical pathology will periodically diagnose all histological specimens, blinded to the initial Costa Rican diagnosis. If the diagnoses are concordant (concordance will be required at the level of negative or atypical metaplasia/Cervical intraepithelial neoplasia (CIN) 1/CIN2/CIN3 or *in situ* cancer), that will establish the US provisional study diagnosis.

Discrepant findings between the Costa Rican and US pathologist will lead to a discussion between them to reach a consensus. These diagnoses will not be available within a timeframe that would allow their use for clinical management purposes. Therefore, US pathology review will be performed to define histological diagnoses for analysis purposes. This review process and its results will be performed and documented in the



US. If there are upgrades of Costa Rican initial histopathology diagnosis they will be communicated to clinical staff in Costa Rica for them to decide upon medical judgment if additional treatment should be given to the participant.

Biopsy and LEEP specimens obtained out of the study clinics during the period of the study will be retrieved for histopathological review by the study pathologists in Costa Rica and NCI, as described above. These histopathological specimens will also be used for research purposes.

### **3.7.1.3. HPV DNA Testing**

Samples of cervical cells preserved in *PreservCyt* medium corresponding to participants whose slides were read as ASC-US as well as those from samples of participants in accelerated screening, specimens collected at the last approved screening visit (L72) or at colposcopy visits will be sent to the HPV DNA testing laboratory for HPV testing using the *Hybrid Capture 2* test (HCII; Digene Corp., Gaithersburg, Maryland, USA)[prior to amendment 4] or another FDA-approved HPV test that provides partial HPV typing that is relevant for clinical management. The HPV tests will detect the defined carcinogenic HPV types (i.e.: HPV types 16, 18, 31, 33, 35, 39, 45, 51, 52, 56, 58, 59, and 68). In addition, partial typing will identify HPV16 and HPV18/45.

For the purpose of quality control of the new HPV testing method providing partial typing, during a transition period between tests (expected to be a transition between Hybrid Capture 2 and *Aptima HPV* from Hologic) both tests will be performed. The overlap will permit comparison of results, and assurance of quality performance. Discrepant test results will be individually reviewed by study HPV testing experts and proper management will be ensured (i.e., the highest-risk result will be pursued clinically to maximize safety, while the results are adjudicated using a third research assay).

For the purposes of clinical management prior to the last regular screening visit (L72), subjects who have HPV positive (or HPV test-inadequate) ASC-US will be managed the same as those receiving an LSIL result. Should residual *PreservCyt* material be insufficient for HPV testing, or should HPV testing fail for any other reason, specimens will be assumed to be HPV positive for clinical management purposes and handled accordingly. For the purpose of clinical management definition, HPV results from L72 and LX (the latter if applicable) along with cytology results, will follow the guidelines, as detailed in Saslow et al. (the Screening Guidelines for the Prevention and Early Detection of Cervical Cancer)[34]. As the key exception, the guidelines will be extended to women under 30, as per Kinney et al. [39] at Kaiser Permanente Northern California.

### **3.7.2. Other Tests**

Several other laboratory assays will be performed for research purposes to achieve the stated objectives of our study. Testing will be performed at a laboratory designated by NCI and Costa Rican investigators.

Examples are as follows:

- PCR-based HPV DNA Genotyping on *PreservCyt* specimens
- PCR typing of HPV DNA from histopathological specimens
- HPV antibody testing
- Cell-mediated immune assays

### **3.8. Adverse Events Monitoring**

We propose to document adverse events as follows:

#### **3.8.1. Adverse events occurring between clinic visits**

At the time of each clinic visit, women will be asked about adverse events that occurred between visits. Serious adverse events will be documented using our study forms, followed through resolution (except for listed conditions below), and, if considered related to vaccination, will be reported to regulatory authorities in the U.S.

In Costa Rica, these AEs will be reported to the IRB; once the vaccine is approved in Costa Rica they will be reported according to the corresponding regulation. If hospitalization occurs, hospital chart review and abstraction will be done by our qualified personnel.

We propose to exclude from documenting and reporting extremely common serious adverse events that are not related to vaccination. Common serious adverse events NOT to be documented or reported:

- Cesarean section due to: previous C-section, cephalopelvic disproportion, arrested active labor, fetal macrosomy, and pre-existing conditions of the mother
- Dengue fever
- Cholelithiasis
- Urinary tract infections
- Infections of a surgical wound
- Abscess
- Sepsis postpartum (i.e., endometritis)
- Postpartum anemia
- Peripartum bleeding
- Traffic accidents

### **3.8.2. Adverse events reported through the toll-free telephone number**

The toll-free telephone number that has been available to participants throughout the vaccine trial will also be available during the LTFU. This telephone number will be staffed by medical personnel. Serious adverse events reported through this mechanism, except for those included in the exclusion list mentioned above, will be documented on our study forms, followed through resolution, and reported.

### **3.8.3. Monitoring pregnancy outcomes**

Information regarding pregnancies and their outcomes will be obtained at every visit performed during long term follow up. We plan to document pregnancies and outcomes for all pregnancies occurring among participants during long term follow up. For deliveries, we will review and abstract relevant information from the “baby card” provided by the hospital to the mothers of newborns. Alternatively, if the “baby card” is not available, information provided directly by the participant will be obtained and, if necessary, extra information will be obtained from the standardized forms that are completed for each delivery at all hospitals in Costa Rica. All miscarriages will be documented, whether or not they involve hospitalization. When hospitalization does occur, review and abstraction of hospital charts will be done by our qualified personnel to obtain detailed information about the miscarriage by the end of the study.

### **3.8.4. Monitoring Baby Adverse events**

Congenital malformations reported by the woman at the time of pregnancy outcome reporting will be documented, as well as those reported by the participant at other times during the study. At the final study visit, we plan to collect information on medical events occurring on children of participants who were born from pregnancies that started within one year after vaccination and on an approximately equally sized control group of children born from women of the UCG. Specifically; we plan to inquire about medical events in the following categories:

- Congenital malformations
- Endocrinologic and metabolic conditions
- Autoimmune diseases
- Hearing and visual problems
- Learning disabilities or mental retardation.
- Death

This information was also collected during the final study visit of the CVT. Collection of this information at the final study visit for the groups of LTFU participants described above will allow for a systematic evaluation of potentially relevant medical events occurring to offspring of vaccinated women.

### **3.9. Efforts to maximize participation/retention**

Even though the withdrawal rate during the vaccine trial has been low (~5%), we propose the following efforts to help women to complete their study visits:

- Reimbursement for transportation costs will be provided if necessary, and, when needed, transportation to the clinic in a study vehicle will be provided.
- Women who move will be given the option to have their clinic assignment changed to a clinic closer to their new residence. Women who work will also have the option to be seen at a clinic that is closer to their work location.

Women will be asked to consent to the collection of the additional research specimens discussed above; the consent will contain the necessary information including risks and benefits. Women, as was the case during the trial, can withdraw from any of the components (i.e. blood draws) of the long term follow up, at any time except the cytology on sexually active women at enrollment of the UCG. Additionally, a woman can be completely withdrawn from the study if she desires. If withdrawal occurs, reason for withdrawal will be documented as much as possible.

### **3.10 Quality Control and Quality Assurance**

The Quality control (QC) unit will monitor the study implementation and follow-up activities, and will implement corrective actions when problems are identified via re-training, distribution of clarification memos, and other activities. More specifically, the following procedures will be implemented by the Quality Control Unit to ensure that the protocol is adequately followed and that deviations are identified and corrected in a timely manner:

proper storage and update of LTFU essential documents and participant files, verification of compliance with internal procedures, deviation reporting, corrective action follow-up and preventive action implementation, calibrations and preventive maintenance of key equipment, training and continued education of staff, and assurance of compliance with local and international applicable regulations. Staff will be trained prior to start and during implementation, as needed, to ensure optimal compliance with standard SOPs developed for this effort.

#### **4. Human subjects protection**

Long term follow up of the vaccine trial will be conducted under the principles of respect for persons, beneficence, and justice. Participants will be recruited into Long Term Follow Up only after they have been informed about the procedures, have understood what is being asked of them, and signed an informed consent form.

Study plans and procedures will be reviewed by the NCI Institutional Review Board (IRB) and a local Costa Rican IRB that is registered with the DHHS Office for Human Research Protection (OHRP) and under a Federal-Wide Assurance (FWA). This study will be conducted mostly by the same highly trained staff working for the trial and following the procedures already in place to maximize patient confidentiality (i.e., unique study participant identification number, separate specimen identification numbers and clinical procedures and interviews conducted in private settings). All data collected during this study will be coded and keyed into a secure data management system developed specifically for this study. Analysis datasets generated from this study will not contain participant names, and will instead rely on the study-specific participant and specimen identification numbers. Staff will be carefully trained and quality control procedures will be in place for the duration of the study.

#### **5. Oversight**

This study is going to be approved and reviewed at least annually by human subjects committees in Costa Rica (IRB) and the United States (NCI SS-IRB). In addition, a binational Scientific Working Group (WG) composed of members external to NIH with expertise in areas relevant to the conduct of the trial was established before the beginning of CVT to advise the study investigators and the Division Director on scientific and policy issues surrounding the vaccine trial and they will continue advising on this new study. The current roster of members of our WG is included as Attachment 5.

## **6. Statistical Analysis Plan, Power and Study Endpoints**

Long term follow up will provide the platform from which a large series of questions can be addressed and from which a large number of analyses can be conducted over several years. It is beyond the scope of this protocol to present details of all of the analyses that will be performed using data/specimens obtained during LTFU. Therefore, we have included below examples of analyses that are planned as part of our effort. These examples are meant to illustrate analyses that are envisioned within each of the three overarching LTFU objectives – 1) evaluation of long-term impact of vaccination (1a-efficacy, 1b-safety), 2) evaluation of immune response correlates of protection, and 3) study of the natural history of HPV.

### **1a. Evaluation of long-term impact of vaccination**

Specific question being asked: What is the overall impact of vaccinating young adult women against HPV on the rate of cervical pre-cancer/cancer over 10 years?

Approach: We will compare the 10-year cumulative rate of CIN3+ observed among vaccinated and unvaccinated women, within strata of interest. Both absolute rate differences and percent reduction in rates will be evaluated.

Choice of endpoint: We will evaluate many outcomes; for purposes of illustration, we've chosen CIN3+ as it is our closest surrogate to invasive cervical cancer. Additional outcomes will include CIN2+ and persistent HPV infections.

Comparison groups of interest: The first comparison for this analysis will be between HPV vaccinated and unvaccinated women. We will compare the rates of endpoints in the 10-yr vaccinated arm to that observed in the unvaccinated women (endpoints from 1st 4 years of HAV arm plus endpoints from the UCG; Table Template A).

The second comparison for this analysis will be between women vaccinated 4 years after entry versus unvaccinated women (Table Templates B and C). This comparison is relevant for considering the impact of a "catch-up" vaccination program of older women. As in the first comparison, endpoints for the unvaccinated women will cumulate the endpoints from 1st 4 years of HAV arm plus endpoints from the UCG during the extended follow-up phase. For women vaccinated 4 years after entry, endpoints include the 1st 4 years of HAV, plus the next 6 years as HAV crosses-over to vaccination. However, only 2 years of events after crossover are observed for all HAV members; the last 4 years are observed on only a subset of approximately 600 HAV members chosen for immunologic analyses. Because the immunologic subset is a random sample of HAV members, we will impute endpoints for HAV women not followed in years 6-10 using an imputation model constructed using years 6-10 from the HPV arm (Table Template B). These HPV women are of the same age as the HAV women, and under randomization and the assumption of no waning vaccine-induced immunity, both groups of women should have the same distribution of endpoints. We will use multiple imputations to assess the uncertainty in this comparison.

For this second comparison, we will check this imputation-based analysis described above against an analysis that uses sampling fractions to weight up the events found in the immunologic subset to the full HAV arm (Table Template C). We expect the two analyses to give similar point estimates. The weighted analysis requires no assumptions about the quality of imputations, but would have higher variance than a multiple imputation analysis based on a reliable imputation model.



Additional comparison groups of interest include those defined by: age at vaccination, time between sexual debut and vaccination, lifetime number of partners at the time of vaccination and number of doses.

Template Table A. Cumulative Rate of CIN3+ During 10-Yrs of Follow-up, by Vaccination Status.

|                    |       |      | Prevalent | Incident          |                   |                    |                          |                               |                                           |
|--------------------|-------|------|-----------|-------------------|-------------------|--------------------|--------------------------|-------------------------------|-------------------------------------------|
|                    | N     | PYrs | # CIN3+   | # CIN3+ (yrs 0-4) | # CIN3+ (yrs 5-6) | # CIN3+ (yrs 7-10) | Cum. Rate (per 1,000 PY) | Difference in cumulative rate | % Reduction (Efficacy for reducing CIN3+) |
| Vaccinated @18-25  | 3,000 |      |           |                   |                   |                    |                          |                               |                                           |
| Vaccinated @ 22-30 | 2400  |      |           |                   |                   |                    |                          |                               |                                           |
|                    | 600   |      |           |                   |                   |                    |                          |                               |                                           |
| Unvaccinated       | 3,000 |      |           |                   |                   |                    |                          |                               |                                           |

Events in blue shaded cells will be cumulated and compared to cumulated events in hatched cells.

Template Table B. Cumulative Rate of CIN3+ During 10-Yrs of Follow-up, by Vaccination Status

|                   |       |       | Prevalent | Incident          |                   |                    |                          |                               |                                           |
|-------------------|-------|-------|-----------|-------------------|-------------------|--------------------|--------------------------|-------------------------------|-------------------------------------------|
|                   | N     | P-Yrs | # CIN3+   | # CIN3+ (yrs 0-4) | # CIN3+ (yrs 5-6) | # CIN3+ (yrs 7-10) | Cum. Rate (per 1,000 PY) | Difference in cumulative rate | % Reduction (Efficacy for reducing CIN3+) |
| Vaccinated @18-25 | 3,000 |       |           |                   |                   |                    |                          |                               |                                           |

|                       |       |  |  |  |  |  |  |  |
|-----------------------|-------|--|--|--|--|--|--|--|
| Vaccinated<br>@ 22-30 | 2400  |  |  |  |  |  |  |  |
|                       | 600   |  |  |  |  |  |  |  |
| Unvaccinated          | 3,000 |  |  |  |  |  |  |  |

Events in blue shaded cells will be cumulated and compared to cumulated events in hatched shaded cells

Template Table C. Cumulative Rate of CIN3+ During 10-Yrs of Follow-up, by Vaccination Status

|                       |       |       | Prevalent | Incident             |                      |                       |                                |                                     |                                                 |
|-----------------------|-------|-------|-----------|----------------------|----------------------|-----------------------|--------------------------------|-------------------------------------|-------------------------------------------------|
|                       | N     | P-Yrs | # CIN3+   | # CIN3+<br>(yrs 0-4) | # CIN3+<br>(yrs 5-6) | # CIN3+<br>(yrs 7-10) | Cum. Rate<br>(per 1,000<br>PY) | Difference in<br>cumulative<br>rate | % Reduction<br>(Efficacy for<br>reducing CIN3+) |
| Vaccinated<br>@18-25  | 3,000 |       |           |                      |                      |                       |                                |                                     |                                                 |
| Vaccinated<br>@ 22-30 | 2400  |       |           |                      |                      |                       |                                |                                     |                                                 |
|                       | 600   |       |           |                      |                      | ***                   |                                |                                     |                                                 |
| Unvaccinated          | 3,000 |       |           |                      |                      |                       |                                |                                     |                                                 |

\*\*\* number of endpoints in this cell times the inverse of the sampling fraction to create a weight

Events in blue shaded cells will be cumulated and compared to cumulated events in hatched shaded cells

Expected number of endpoints and power:

We estimate based on results from comparably aged women enrolled in our previous cohort studies and from available CVT data that a total of 270 CIN3+ outcomes will be diagnosed during the 10 years of follow-up among the 9,000 participants in LTFU (~3000 per arm; 3 arms). Of these, 105 outcomes are expected to be detected during the extended follow-up period. Under the assumptions that 1) vaccine efficacy is prophylactic only, 2) the prophylactic efficacy during the 10-year follow-up period is near a) 100% against HPV-16/18, b) 25% against HPV types in the  $\alpha$ -7/9 species, and c) 0% for other HPV types, we expect to observe that HPV vaccination reduces the burden of CIN3+ over 10 subsequent years by 49% in populations that vaccinate women between the ages of 18-25 and by 18% in populations that vaccinate women between the ages of 22-30. This reduction in vaccination impact is expected because women in older age categories 1) have already been exposed and infected and 2) have less incident HPV infections.

Our analysis plan uses multiple imputations and is difficult to calculate power for. However, we expect results to be in between observing the full HAV arm for 10 yrs (n=3000) and using only the part of HAV observed for 10 years (n=600). We should therefore be able to convincingly demonstrate that the 10-year impact of vaccinating young adult women is unlikely to be higher than 63-76% and 37-60% for programs that target 18-25 and 22-30 year old women, respectively (upper bound of 95% CI). The smaller numbers (63% and 37%) are based on observing the total HAV arm for 10 yrs (n=3000); the larger numbers (76% and 60%) are based on observing the full 10 yrs in HAV only on immunogenicity subset (n=600). Multiple imputation will yield a result in between these extremes; in particular, if the imputation model is reliably constructed as expected, our upper CI bounds should be closer to the smaller values based on n=3000.

Importance of LTFU for this evaluation:

The first 4 years of follow-up within CVT will only allow us to evaluate the short-term impact of vaccination on CIN3+. The estimate of efficacy over the first 4 years gives more weight to prevalent infections and disease present prior to vaccination (which the vaccine cannot prevent) and no weight to any protective effect of the

vaccine beyond the first 4 years. Already, proponents of adult vaccination have criticized overall vaccine impact estimates that do not account for longer-term benefit of vaccination. A formal evaluation of vaccine impact over a 10-year period of time would take our population out to ages 28-35, covering the period of highest risk for CIN3+ among women in screened populations such as ours. The 10-year evaluation will therefore provide a better estimate of the “lifelong” impact of vaccination, since most CIN3+ outcomes occur by age 35 in screened populations. Evidence for low vaccine impact over the course of 10 years would suggest that vaccination of young adult women is not a cost-effective public health intervention. Conversely, evidence that the 10-year impact of vaccination is high would suggest that vaccination of young adult women is indeed warranted. The estimates of 10-year vaccine impact obtained from LTFU will provide key information that can be used by health economists when modeling the cost-effectiveness of vaccination programs.

Importance of the unvaccinated control group for this evaluation:

HPV infections and associated cervical disease rates are zero until sexual debut, increase rapidly with time (and years since sexual debut) then level off and decrease with age, reflecting the common pattern of exposure to HPV surrounding sexual debut: there is no/little exposure before sexual debut, peak exposure in the early years after initiation of sexual life, followed by diminished exposure later in life resulting in relatively few unexposed women at older ages. As a result of these strong age patterns, if we observe little or no cervical disease associated with HPV-16/18 infections in years 5-10 of follow-up among vaccinated women (in the absence of expected rates among unvaccinated women), we would not be able to determine to what extent the reduced disease rate observed is due to a decrease in risk (due to decreased exposure), even in the absence of vaccination, or continued exposure in the context of maintenance of high vaccine efficacy. Having an appropriate control group from the same birth cohorts as vaccinated women will allow us to estimate expected disease burden in the absence of vaccination, to which rates observed among vaccinated women can be directly compared.

**2. Evaluation of immune response correlates of protection among vaccinated women**

Specific question being asked: Do levels of immune response markers observed shortly after vaccination predict the long-term success of the HPV vaccine at preventing infection and neoplasia?

Approach: For efficiency, a nested case-control approach is envisioned to evaluate this question. We propose to compare women who become infected against a subset of those who do not (non-failures) with respect to immune response markers of interest (Template Table D).

Template Table D. Distribution and Risk of Vaccine Failure by Selected Immune Response Markers

|                                                                 | # Failures | # Non-Failures | OR                    | 95% CI |
|-----------------------------------------------------------------|------------|----------------|-----------------------|--------|
| Immune Marker = (HPV-16, HPV-18 Abs, etc.),                     |            |                |                       |        |
| Measured in = (saliva specimens, serum or cervical secretions), |            |                |                       |        |
| Collected at T = (1mo, 6mos, 12mos, 48mos, time of failure)     |            |                |                       |        |
| Low level                                                       |            |                |                       |        |
| Medium level                                                    |            |                |                       |        |
| High level                                                      |            |                |                       |        |
|                                                                 |            |                | p-trend               |        |
|                                                                 |            |                |                       |        |
| Mean level                                                      |            |                | p-comparison of means |        |
| Minimum level*                                                  |            |                |                       |        |
| Maximum level*                                                  |            |                |                       |        |

\* Maximum level observed among women who fail and minimum level observed among women who are non-failures will help define minimum levels required for protection.

Defining “failure” (Cases): All women vaccinated at age 18-25 who have breakthrough incident HPV-16/18 infections or infections with HPV types in the  $\alpha$ -7/9 species for which cross-protection has been observed will comprise the case group for this evaluation stratified by number of doses. Persistent positivity will be required in order to rule out transient exposures that do not result in the establishment of a true infection.

The number of women expected to develop such infections despite vaccination is currently unknown, since durability of vaccine protection against HPV-16/18 and degree of cross-protection for closely related HPV types is not understood. Note: It is likely that near complete protection against HPV-16/18 infections will last through 10 years, in which case the present evaluation will focus largely on protection against the HPV types in the  $\alpha$ -7/9 species for which evidence of partial cross-protection has been suggested.

Defining “non-failure” (Controls): As a comparison group, we propose to select women who received vaccination and did not develop infections with HPV types of interest during follow-up. Defining vaccinated women who are successfully protected against HPV-16/18 infection would require challenge with HPV-16/18 virions, an approach that is clearly not feasible in human studies. Therefore, we propose to select controls from among vaccinated women who did not develop an infection of interest during follow-up despite having a high likelihood of exposure. Likelihood of exposure will be defined based on sexual behavior (e.g., women with multiple sexual partners). Furthermore, we propose to match each breakthrough case to one or more controls (case:control ratio to be defined after total number of cases is known) based on age, time since sexual debut, and time since vaccination. Matching on hormonal contraceptive use is also being considered, since such use has been shown to be an important modifier of levels of immune response markers at the genital tract (11).

Choice of immune markers (“exposure” variables): A strength of our study in Costa Rica is the rich biological specimen collection component of the study. This will allow for the measurement of numerous systemic and local markers of immune response.

As a relevant and easily accessible marker of immune response, we propose initially to evaluate systemic and local levels of antibodies against HPV-16/18 VLPs measured by ELISA as a correlate of protection. We are the only trial to collect mucosal cervical specimens, which will allow us to evaluate whether breakthrough infections result from low antibody levels at the cervix despite maintenance of detectable antibodies systemically. Evaluation can be expanded to include measurement of antibodies and neutralizing potential against cross-reactive HPV types and levels of memory B-cells, among others, using the same analytical approach defined herein.

Levels of antibodies directed against HPV-16/18 VLPs will be measured at various relevant timepoints (1-mo, 6-mos, 12-mos, 48-mos, time of failure) for selected cases and controls. Testing of specimens collected at various timepoints is proposed because our previous efforts (12) have shown a lack of correlation between antibodies measured at different timepoints following vaccination, and the most relevant timepoint for the prediction of long-term protection is not known. Antibody levels observed at each of the timepoints of interest will be compared between cases and controls (Template Table D).

Importance of LTFU for failure evaluation:

For the evaluation of HPV-16/18 failures, LTFU is required, since no breakthrough infections are expected in the first 4 years of follow-up. In fact, as indicated above, it is likely that few HPV-16/18 failures will be observed even during the extended follow-up period, although there may be an increased chance for breakthrough infections among women who received fewer than three doses, thus highlighting the importance of this subgroup. Our plan therefore also includes evaluation of immune determinants of cross-protection.

For the evaluation of immune determinants of cross-protection, LTFU has the following advantages over the initial 4 years of follow-up in CVT:

- A larger number of failures among vaccinated women will be observed over the extended follow-up period, making evaluation of individual HPV types a possibility.
- The extended follow-up period will allow us to more precisely define “non-failures” (controls) since additional time will result in additional opportunity for exposure to the HPV types of interest among women who do not develop infections. Therefore, misclassification will be reduced when defining the control group for our nested study.
- The extended follow-up period will improve our ability to evaluate whether markers of long-term immune memory correlate with long-term protection.
- The extended follow-up period will increase our ability to evaluate patterns of immune response over time that are predictive of successful vaccine protection. [n.b., Statistical methods for such evaluation are still being defined].



**3. Study of the natural history of HPV: Evaluation of the impact of vaccination on rates of cervical lesions associated with non-vaccine HPV types**

Specific question being asked: Lesion replacement. Does prevention of HPV-16/18 associated cervical lesions through vaccination lead to an increase in the rate of cervical lesions associated with other carcinogenic HPV types that the vaccine does not protect against?

Approach: We will compare the 10-year cumulative rate of incident CIN2+ associated with HPV types other than HPV-16/18 and closely related HPV types in the  $\alpha$ -7/9 species for which evidence of vaccine cross-protection is demonstrated between vaccinated and unvaccinated women (Template Table E).

Choice of endpoint: We have chosen as the main endpoint for this analysis CIN2+. Use of virological endpoints for this evaluation would not be appropriate given the strong expectation that replacement will not be evident at the infection level because infections behave independently and multiple infections are common. If replacement is present, it will only be demonstrable at the pre-cancer lesion level. The high rate of multiple HPV infections observed in natural history studies (about 30-40% of HPV infected women have evidence of infection with multiple HPV types) suggest that infection with each viral HPV type is independent of the presence/absence of other HPV types, in the same way that infection with one STI (e.g., *C. trachomatis*) does not preclude infection with another (e.g., HSV-2). In fact, because infection with different HPV types appears to be independent events and multiple infections are common, we hypothesize that removal of HPV-16/18 infections via vaccination could lead to a “paradoxical” increase in the rate of pre-cancer lesions associated with other carcinogenic HPV types. We believe this because prevention of HPV-16/18 in the case of a woman who would have developed multiple HPV infections would prevent the development of lesions associated with HPV-16/18 but would allow development of lesions associated with other carcinogenic HPV types. This phenomenon is plausible because HPV-16, in particular, has been shown to be biologically more aggressive than other carcinogenic HPV types and is therefore believed to be responsible for the development of pre-cancer lesions when multiple infections are present. Prevention of the more aggressive HPV-16 through vaccination could provide opportunity given time for the less biologically aggressive carcinogenic HPV types to develop into pre-cancer lesions, even in the absence of replacement at the infection level.

Main comparison of interest: The primary comparison for this analysis will be between vaccinated and unvaccinated women. The rate of non-HPV-16/18 or related type CIN2+ lesions diagnosed post-vaccination among women who received the HPV vaccine at entry into CVT will be compared against the rate of similar lesions observed in the control arm of CVT in years 1-4 (i.e., prior to crossover vaccination of the control arm) and against the rate of similar lesions observed in the new unvaccinated control group in years >4-10 (i.e., during LTFU), as summarized in Template Table E.

Template Table E. Rates of Incident CIN2+ Associated with Carcinogenic HPV Types not Protected Against Through Vaccination, by Study Group

| Study Group                            | Years 1-4      |       |         |      | Years 5-10     |       |         |      | Total |       |         |      |
|----------------------------------------|----------------|-------|---------|------|----------------|-------|---------|------|-------|-------|---------|------|
|                                        | N              | P-Yrs | # CIN2+ | Rate | N              | P-Yrs | # CIN2+ | Rate | N     | P-Yrs | # CIN2+ | Rate |
| CVT HPV Vaccine Arm                    |                |       |         |      |                |       |         |      |       |       |         |      |
| CVT HAV Vaccine Arm (pre-crossover)    |                |       |         |      | Not Applicable |       |         |      |       |       |         |      |
| Unvaccinated Control Group (LTFU only) | Not Applicable |       |         |      |                |       |         |      |       |       |         |      |
| Diff. In Rates (p-value)               |                |       |         |      |                |       |         |      |       |       |         |      |

Expected number of endpoints and power:

We estimate based on results from natural history studies and data available from CVT to date that approximately 16 CIN2+ outcomes (from HPV types other than 16 and 18) will be diagnosed during the first 4 years of follow-up in the HAV arm of CVT, and that 22 outcomes (from HPV types other than 16 and 18) will be

diagnosed in years >4-10 of follow-up among participants in the new unvaccinated control group. The table below summarizes study power estimates for varying differences in rates of CIN2+ between vaccinated and unvaccinated women.

Table. Study Power Given Rate Differences\*

| Rate (CIN2+) in Unvaccinated ( $P_0$ ) | Rate (CIN2+) in Vaccinated ( $P_1$ ) | % Increase | Power |
|----------------------------------------|--------------------------------------|------------|-------|
| 38 per 3,000 women                     | 45 per 3,000 women                   | 18%        | 18.7% |
| 38 per 3,000 women                     | 51 per 3,000 women                   | 34%        | 39.2% |
| 38 per 3,000 women                     | 60 per 3,000 women                   | 57%        | 71.9% |
| 38 per 3,000 women                     | 75 per 3,000 women                   | 97%        | 96.9% |

\* Based on 1-sided alpha = 0.05.

Importance of LTFU for this evaluation:

The number of events in the first 4 years of follow-up within CVT will allow us to evaluate whether vaccination results in viral replacement at the infection level but will not permit an adequate evaluation of the more important question of replacement at the lesion/pre-cancer level. Replacement is only expected at the pre-cancer level and not at the virus infection level for reasons summarized above. The added number of pre-cancer events expected during the extended follow-up period will permit an evaluation of whether vaccination against some HPV types results in replacement by other HPV types.

Importance of the unvaccinated control group for this evaluation:

We are planning to offer women in the HAV arm of CVT the HPV vaccine at the end of the first 4 years of follow-up. Therefore, recruitment of a new unvaccinated control group is essential to provide valid estimates of pre-cancer rates associated with non-HPV-16/18 infections among unvaccinated women during all 10 years of follow-up.

## 7. Collaborators and consultants

The main collaborating institutions involved in this study are summarized below:

**U.S. National Cancer Institute (NCI):** The NCI, in close collaboration with its Costa Rican collaborators, is responsible for the overall design and implementation of this protocol. NCI will also be responsible, in collaboration with its Costa Rican collaborators, for the analysis of data obtained.

**Proyecto Epidemiológico Guanacaste (PEG):** PEG investigators, in close collaboration with NCI collaborators, are responsible for the overall design of this protocol and for conducting the field activities required for its implementation, including quality control activities. PEG investigators are also responsible, along with their fellow NCI collaborators, for the analysis of data obtained.

**Information Management Services (IMS):** Under contract with the NCI, IMS is responsible for the development and maintenance of the data management system used for this study. IMS will also assist the preparation of reports, in the running of edit reports on data received from Costa Rica, and in data analysis.

**NCI Specimen Repository (Currently located at Frederick Central Repository):** Under contract with the NCI, Frederick Central Repository will serve as the primary repository for specimens collected from LTFU. Frederick Central Repository will also provide assistance to the NCI and Costa Rican investigators in the maintenance of the local repository in Costa Rica.

**University of Costa Rica:** Some of the local laboratories in Costa Rica are set at the University of Costa Rica and will work in close collaboration with PEG investigators and NCI.

## 8. Budget

The proposed budget for this effort is summarized below.

| <b>Year</b>  | <b>New Contract</b> | <b>Branch Support Services</b> | <b>Computing Contract</b> | <b>Bioprocessing, storage, or assay contract</b> | <b>Other</b> | <b>Total</b>      |
|--------------|---------------------|--------------------------------|---------------------------|--------------------------------------------------|--------------|-------------------|
| <b>FY09</b>  | 315,153             | N/A                            | 0                         | 35,000                                           | 20,000       | 370,153           |
| <b>FY10</b>  | 369,097             | N/A                            | 50,000                    | 35,000                                           | 20,000       | 474,097           |
| <b>FY11</b>  | 780,904             | N/A                            | 100,000                   | 75,000                                           | 40,000       | 995,904           |
| <b>FY12</b>  | 2,677,905           | N/A                            | 50,000                    | 90,000                                           | 65,000       | 2,872,905         |
| <b>FY13</b>  | 2,647,731           | N/A                            | 50,000                    | 90,000                                           | 65,000       | 2,852,731         |
| <b>FY14</b>  | 2,647,731           | N/A                            | 50,000                    | 90,000                                           | 65,000       | 2,852,731         |
| <b>FY15</b>  | 2,647,731           | N/A                            | 100,000                   | 90,000                                           | 65,000       | 2,902,731         |
| <b>FY16</b>  | 2,647,731           | N/A                            | 150,000                   | 90,000                                           | 65,000       | 2,952,731         |
| <b>TOTAL</b> | 14,723,983          | N/A                            | 550,000                   | 595,000                                          | 405,000      | <b>16,273,983</b> |

## 9. Projected timetable

- Initial Branch (HREB) discussion – September 2007
- Branch (IIB) review of Concept – January 2008
- SAG review – February 2008
- External Working Group review – March 2008
- Census for new control group – May-August 2008
- TEP review – June 2008
- IRB review (US and CR) – October 2008
- Begin consenting women – January 2009
- Begin long-term follow-up visits – January 2011
- Begin study exit process – January 2014
- End of field activities – January 2016

## 10. Collection of extra-cervical specimens

### 10.1 Background and rationale

HPV is not only the cause of cervical cancer, but is increasingly recognized as an important cause of some oropharyngeal, vulvar, and anal cancers (13). Further, recent data suggest that the incidence of these HPV-associated cancers is on the rise (14-19).

#### 10.1.1 HPV and anal cancer

Anal cancer is considered a rare cancer, with approximately 1.5 per 100,000 individuals being affected yearly worldwide (20; this rate is markedly higher in some populations, such as HIV-positive individuals and men who have sex with men. Despite these pockets of highly affected men, rates are significantly higher in women (figure 6) (17). Further, published analyses based on data from US cancer registries have documented that

rates of anal cancer have been increasing over time: this trend was started in the mid-1970's and persists today among both men and women (16, 17). Similar trends from Europe have been reported (18,19).

Figure 6.

**Published Figure on Anal Cancer Incidence by Gender in the United States**

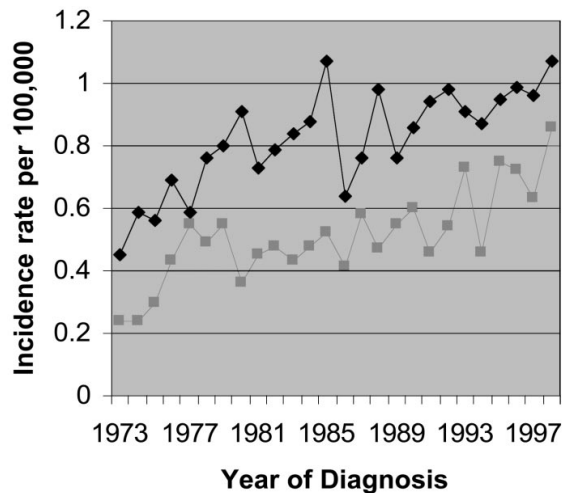

Females black line; males grey line

HPV causes most if not all anal cancers. In the largest series to date, 399 formalin-fixed paraffin embedded invasive anal cancers were collected from pathology archives from 43 countries: preliminary analysis shows that HPV was identified in 80.0% of cases, with HPV16 being the most common type detected (80% of HPV-positive tumors) (21). HPV16 infection is one of the most important human carcinogens and has been estimated to cause >300,000 deaths per year (13).

Given the link between HPV infection and anal cancer, studies have investigated anal HPV among individuals without cancer. Only one natural history study has focused on HIV-negative women (all other studies focused on men who have sex with men [MSM] and/or HIV-positive individuals). The HPV Hawaii Cohort (22) focused on healthy, sexually active adult women aged 18 or greater (N>2000) and showed that anal HPV infections are very

common among healthy women, but most of these infections are transient and clear in a short time period (~1 year) (22-24). Research beyond that time frame is scarce; the rate of long-term persistent anal HPV has not been well-described. Persistent HPV infections are the most biologically relevant infection because, at the cervix, long-term (2 years or more) HPV16 or 18 persistence is strongly associated with absolute risk of progression to cervical precancer.

Recently, screening for anal precancer using anal cytology has been conducted among some high-risk populations, including MSM and HIV-positive individuals and has been suggested for women with history of high-grade cervical disease or cervical cancer (25). There are several studies on anal cytology among MSM, some among HIV-positive women, but few among HIV-negative women (26-29). Results from these studies suggest that anal cytology shares many of the same limitations as cervical cytology (i.e., poor sensitivity and predictive value). Thus, expanding anal screening would likely result in many unnecessary anal procedures including anoscopy, biopsy, and maybe even over-treatment. At present, there is a dearth of evidence to assess the risks and benefits associated with anal cancer screening among healthy women.

#### **10.1.1.1 Rationale for this anal HPV evaluation**

To evaluate the hypotheses that the HPV16/18 prophylactic vaccine protects against HPV16/18 infections in the oral, vulvar, and anal regions, a proof-of-principle study was initiated within the Costa Rica community-based vaccine trial entitled: "A double blind, controlled, randomized, phase III study of the efficacy of an HPV16/18 VLP vaccine in the prevention of advanced cervical intraepithelial neoplasia (CIN2, CIN3, adenocarcinoma in situ [AIS] and invasive cervical cancer) associated with HPV16 or HPV18 cervical infection in healthy young adult women in Costa Rica" (CVT). To allow for this evaluation, we amended the protocol of the clinical trial and received IRB approval to collect oral, vulvar, and anal specimens from participants at their last visit (48-month visit or v48) as part of the blinded phase of our trial



HPV testing of the anal samples collected at V48 was done and approximately 40% of women had a prevalently-detected anal HPV infection, 20% had anal oncogenic HPV infection, and 6% had anal HPV16/18 infection (data not published). Our observed anal HPV prevalence was higher than that observed in the Hawaii cohort study and anal cytology studies among HIV-negative women (22, 26-29). Further, analysis of registry based data in Costa Rica suggests that anal cancer may be increasing in that country as well, although small numbers preclude strong interpretation. In fact, in recent years, anal cancer among younger birth cohorts appears to be rising (higher rates among 40-54 year olds in the later time periods). Combined with the need for information about use of anal cytology among healthy women, the high point prevalence of anal HPV in our cohort and increasing rates of anal cancer in many countries motivated this proposed evaluation of anal carcinogenic HPV persistence and cytological abnormalities.

#### **10.1.2 Oral HPV**

Infection with Human Papillomavirus (HPV) is also associated with a subset of head and neck cancers occurring specifically in the oropharynx. HPV type 16 (HPV16), by far the most common type present in HPV-positive oropharyngeal cancers and incidence of these HPV related cancers is on rise (14, 15).

At the last CVT visit (V48) collection of oral samples for HPV testing was implemented to evaluate vaccine efficacy against oral HPV. Testing of oral samples collected at V48 is being done and among 2000 samples already tested the prevalence of HPV 16/18 was 0.25%. The potential for understanding long-term oral HPV persistence is also of scientific interest. However, given the exceptionally low prevalence of infection, we feel that regularly collecting and testing oral specimens from all women is inefficient and underpowered for natural history work. However, we could study rates of clearance among HPV positive women. Given the low prevalence of oral HPV, we propose to collect oral specimens from the remaining unvaccinated control group (UCG) women at the enrollment visit (L0) as well as collect an oral specimen at the last regular screening visit, L72, from all participants, vaccinated and unvaccinated to maximize power for the main vaccine efficacy analysis. This will guard against lack of statistical power to say conclusively whether prophylactic vaccination

against HPV infection also protects against oral HPV infections. We also propose to collect and test oral samples from women who are HPV positive for any oral HPV at the last CVT visit regardless of vaccination arm (Approximately 338 women) at their 2 year visit to investigate rates of clearance.

We propose to collect oral and anal specimens analogous to those collected from vaccinated women during their last visit in the CVT (V48) from women in the unvaccinated control group (UCG) at the enrolment visit (L0). In addition, we propose to collect anal specimens from all women (vaccinated and unvaccinated) who due to HPV or cytology results at enrolment require a 6-month re-screening visit (L6); this subset of women is of particular interest as they are more likely to have HPV at the extra-cervical sites given their known infection status at the cervix. The sequentially smaller groups of women who require 12- and 18-month re-screening visits (L12 and L18) will also be included. Finally, we propose to collect anal samples on all women in the long-term follow-up at the 24-month screening visit (L24) and at the last regular screening visit (L72), to evaluate long-term viral persistence and long-term vaccine efficacy at the anus.

### **10.1.3 Vulvar HPV**

HPV is also associated with a subset of vulvar and vaginal cancers. As well as in other extracervical cancers, HPV 16 is the most prevalent HPV detected among vulvar HPV related cancers (13).

Collection of vulvar specimens was also implemented at the last CVT visit and testing of these samples is being performed. Among 800 samples already tested, approximately 36% of women were positive for vulvar HPV, 18% of women were positive for an oncogenic HPV and 3% were positive for HPV16/18.

Considering that there are not screening methods for vulvar HPV and precancer, and due to limited financial resources, we are not proposing an evaluation of the infection in this region at this time.

Of note, the collection of extra-cervical specimens was planned for all women during this long-term follow-up study, both at baseline and prospectively, but due to funding restraints at the time, these collections were removed.

**Table 3. Proposed timing for collection of extra-cervical specimens**

|                           | <b>L0</b>                                                   | <b>L6, L12, L18*</b> | <b>L24</b>                                                       | <b>L72</b>    |
|---------------------------|-------------------------------------------------------------|----------------------|------------------------------------------------------------------|---------------|
| <b>Unvaccinated women</b> | Oral,<br>Anal                                               | Anal                 | Anal                                                             | Oral,<br>Anal |
| <b>Vaccinated women</b>   | (Anal and oral samples are collected during V48 of the CVT) | Anal                 | Anal,<br>Oral for women who were oral HPV positive at V48 of CVT | Oral, Anal    |

\*Applies only to the subset of women requiring these extra-screening visits.

## 10.2 Objectives

Given the preliminary anal HPV results of the women who attended the last visit of the CVT, we recognize the importance of having anal specimens collected from women in the LTFU in order to investigate the natural history of anal HPV infection among healthy young women and to evaluate the association of persistent anal HPV infection with cytological abnormalities. This evaluation is designed to quantify the likelihood of anal abnormalities in subsets of women with presumed different underlying risk of anal disease (i.e., women with persistent anal infections; those with high-grade cervical disease; those without these conditions). The specific aims are:

1. To investigate the baseline (L0) prevalence of anal HPV infection in the UCG (comparable sample from CVT women were collected at V48 of the vaccine trial);

2. To investigate the prevalence of anal HPV infection in LTFU women (UCG and CVT) with known cervical HPV infection;
3. To describe the natural history of anal HPV infection. To do so, we will define the proportion of anal HPV 16, 18, and other oncogenic infections in young adult women that persist for 2 years. We will also define the incidence of new anal HPV infection among a sample of women who were anal HPV-negative at baseline.
4. To define the proportion of anal HPV 16, 18 and other oncogenic HPV infections associated with high-grade abnormalities detected by anal cytology or other screening tests like p16. This will be important to help plan future studies in this area.
5. To define the proportion of anal cytological abnormalities among women with high-grade cervical disease. Women diagnosed with cervical precancer are currently being targeted for anal cancer screening. Quantifying anal disease risk among this high-risk group of women may inform current screening guidelines.
6. To investigate the rates of clearance of oral HPV infections two and six years after being positive for oral HPV.

Secondary aims of this work include:

1. To evaluate vaccine efficacy against 2-year persistent anal HPV infections;
2. To study the determinants of anal HPV infection; and
3. To evaluate vaccine efficacy against 2-year persistent oral HPV infections;
4. To evaluate long-term vaccine efficacy against oral and anal HPV 16/18 infection

*Additional benefits of these specimen collections include:*

Collection of the anal specimen at the 6-, 12- and 18-month re-screening visits provides the opportunity to collect a 'baseline specimen' among the subset of UCG women who had their L0 visit prior to approval of this protocol amendment, in order to possibly contribute to the long-term persistence evaluation.

Collection of the oral specimen among UCG women at L0 and L72 has the potential to provide a resource in order to maximize power for the evaluation of oral HPV vaccine efficacy (by including the UCG women as additional controls).

In summary, the first amendment to the protocol “Extended follow-up of young women in Costa Rica who received vaccination against human papillomavirus types 16 and 18 and unvaccinated controls” was prepared to collect oral and anal specimens from women in the UCG at their L0, to collect anal specimens from all women participating in this study at their re-screening visits at 6, 12 and/or 18 months, and at the 24 months follow-up visit. The second amendment to the protocol has been prepared to include preparation of anal cytology using anal samples collected at visit L24 and additional research tests like p16 and the collection of oral samples among women who were positive for any oral HPV at the last CVT visit. These collections will enable us to address many new, important research questions pertaining to the epidemiology of anal HPV infection, as well as ensure our ability to look at vaccine efficacy against oral HPV infections. The third amendment to the protocol has been prepared to include 1- the collection of anal and oral specimens at the last regular screening visit (L72) from all participants to enable the evaluation of long-term vaccine efficacy against oral and anal HPV 16/18 infections, and 2- the contact/invitation to participate in LTFU of women who received fewer than three vaccine doses and a group of women who received all three doses but were not previously invited (stopped attending visits during CVT, withdrew from the study during CVT or lived outside the study area) to assess vaccine efficacy and immunogenicity among women who received fewer than three doses of HPV vaccine.

### **10.3 Methods**

#### **10.3.1 Sample collection**

The oral specimen will be collected at the time of the enrolment visit of the UCG (L0-visit), at the 2 year visit among women who were positive for any oral HPV at V48 and at the last regular screening visit, L72, from all

participants. The anal specimen will be collected at the time of the enrolment visit of the UCG (L0-visit), at the 6-, 12- and 18-month re-screening visits (L6, L12, L18) for all study women, and at the 2-year and 6-year screening visits (L24 and L72). During the pelvic examination, the anal specimens will be collected prior to cervical sampling according to a standard procedure that parallels the one being used for women in the main trial at visit 48.

### **10.3.2 Laboratory assays**

Our main objective is to evaluate type-specific HPV DNA positivity in the specimens we will use the SPF/DEIA/LiPA assay, the same assay being used for cervical HPV DNA detection in our study for anal HPV testing at base line and oral HPV testing. The 2 year anal specimen collected from these women will be used for HPV testing and also for anal cytology preparation.

Initially, we will focus (HPV test, anal cytology interpretation and other research tests) on several groups of women in our cohort to achieve our specific aims: 1) women with anal HPV16/18 positivity at baseline (N=~300), 2) women older than 25 with carcinogenic anal HPV positivity at baseline (N=~450), 3) women with high-grade disease at the cervix, defined as a histologically confirmed CIN3 or a cytological high grade diagnosis at the visit 2 years after the baseline anal sample collection, who are hypothesized to be at elevated risk for HPV-related anal disease (N=~280), and 4) a random sample of women older than 25 who are anal HPV-negative at baseline (to serve as controls and confirm the low rates of HPV 16/18 infections and underlying cytological abnormalities, N=250). As baseline anal HPV status becomes available for women in the UCG, they will be included in the above selection criteria. Based on initial results and subject to additional funding we could extend testing to additional groups of women.

Among the groups described above, their anal samples will be tested for type-specific HPV SPF/DEIA/LiPA assay. Anal cytology will be performed using the ThinPrep PapTest™ (Cytoc Corporation, USA). ThinPrep slides will be prepared by qualified study staff at the local cytology staining laboratory, will be screened by a cytotechnologist specifically trained to screen anal ThinPrep slides, and will be interpreted by a trained cytopathologist, using the

Bethesda 2001 classification system. Other novel screening tests and assays may be used on these samples, such as p16 staining.

The 6-year anal specimen will be used for HPV testing and other research related assays for all participants.

#### **10.4 Statistical analysis plan**

We present an outline of the main analysis being considered, as an example of the many questions that can be addressed with these additional specimens.

*Definition of outcomes.* Several categorizations will be made using the data.

1. Anal HPV positivity for any type
2. Anal HPV positivity for types defined as carcinogenic at cervix
3. Anal HPV positivity by type
4. Anal cytology abnormalities (High grade – Low grade)
5. Oral HPV positivity for any type
6. Oral HPV positivity by type

For aim 1, the prevalence of any, carcinogenic, and type-specific HPV infections in anal specimens will be calculated. For aim 2, conditional probability estimates will be calculated; specifically, if a woman is HPV16 positive at the cervix, what is the probability she is HPV16 positive at the anus? For aim 3, we will define long-term persistence as the same anal HPV type being detected at baseline (for most at L0 or V48, for some at the 6-month rescreening visits) and at the 24 month visit, and different statistical methods will be used to evaluate the HPV persistence at extra-cervical anatomic sites. For aims 4 and 5, we will assess the prevalence of abnormal anal cytology and correlate this with anal HPV infection and high grade cervical disease. For aim 6 we will calculate the rate of clearance of HPV infections at the 2 and the 6 year visits.

In the analysis, we will account for potential modifiers of risk, including by HPV type, vaccination status, age, anal and oral sexual behaviors, and cervical HPV status. Determinants of anal HPV persistence and clearance, including behavioral and clinical measures, will be assessed. Additionally, we will assess the prevalence of abnormal anal cytology and correlate this with anal HPV infection.

Power. Because of the limited published data available, calculating power is challenging. At the cervix, approximately 10% of women infected with HPV persist for 2+ years, and these women are at a high risk of progression to precancer. Assuming a similar pattern at the anus, with 300 women with baseline anal HPV16/18 infections, we will be able to calculate the true rate of long-term anal HPV16/18 persistence with the following precision:

| True rate of long-term anal HPV16/18 persistence | Precision of the Estimate |
|--------------------------------------------------|---------------------------|
| 5%                                               | 2.8% to 8.1%              |
| 7%                                               | 4.4% to 10.5%             |
| 10%                                              | 6.8% to 14.0%             |
| 12%                                              | 8.5% to 16.2%             |

For this calculation, we did not include the ~270 women with cervical disease because the rate of anal HPV persistence in this group is unknown. Instead, we will evaluate all women who meet the criteria of cervical precancer/cancer and who consented to anal specimen collection.

### **10.5 Human subject considerations**

Women will be asked to consent to the collection of the additional research specimens discussed above they will also consent to the use of anal samples to produce anal cytologies and the interpretation of them in a subset of women as well as performance of other research tests; the consent addenda will contain the necessary information including risks and benefits of these new collections. Women will have the option to refuse collection



of any of the specimens or accept collection and refuse anal cytology preparation or other research tests; refusal to collect any of the new specimens, refusal to anal cytology preparation or to other research tests will not affect their participation in the other aspects of the study. While the clinical utility of these research tests are unknown, anal cytology results will be informed to participants in their next visit after the result is available and as with every other test, participants have the right to request their results, in which case the results will be given to them when available.

#### **10.6 Clinical implications**

Currently the clinical implication of oral HPV infection or persistence is not known and there are not screening methods for oral pre-cancer. The clinical implication of anal HPV infection in low-risk women is not known either. There are no standard recommendations for follow-up or proven treatment for reducing cancer at these sites. Therefore, these samples are being collected for research purposes only. As such, HPV test results will not be used for clinical decision making. Several issues support this; they are as follows:

1. These samples will be tested using research assays, not FDA-approved clinical assays.
2. Based on data from the National Tumor Registry of Costa Rica (1989 to 2004), there were no cases of anal or oropharyngeal cancers in this age group; in fact, the incidence for these cancers among women under the age of 45 was zero (no cases) for this period. For women aged 45 and older in Guanacaste (over the 16 years of registry data), the annual incidence of anal cancer was 1.1/100,000 (n=4 cases) and oropharyngeal cancer was 0/100,000 (n=0 cases). Therefore, while these rare cancers do occur in Guanacaste, they were rare and among women considerably older than our study population. Even though it is not known whether high HPV prevalence in the anal region will translate into increased risk for cancer as these women age this supports the notion that clinical management is not necessary at this time.

In relation to anal cytology it is important to note that the above data will be used to define the next steps of the study.. Even though the further follow-up has not been defined yet, as it is currently envisioned, the persistent anal HPV and cytology status of women will be used to identify women who require further anal study. Specifically, women whose anal sample tests positive for carcinogenic HPV or have an abnormal anal cytology at the 2 year visit will be sent to an additional visit 1 year later. Women who have persistent HPV infection or high-grade anal cytology on two consecutive anal specimens will be sent for additional clinical management (anoscopy with biopsy of lesions as needed) in order to assess histology in the context of both cytology and type-specific HPV data. In any case investigators will guarantee that women who require clinical management due to anal cytologic results will receive it either by referring them to the appropriate medical institution (i.e. security health care system, as it is done with women diagnosed with cervical cancer) or by evaluating them through anoscopy and biopsy as described above.

#### **10.7 Conclusion**

In this study of the long-term follow-up of HPV 16/18 vaccinated and unvaccinated women we have the opportunity to address research questions about the epidemiology of anal HPV infection in this population. In the first amendment, we requested to implement collection of anal specimens among women in the UCG at their enrolment visit, from the subset of UCG and CVT women who require L6, L12, L18 visits, and from all participants in long-term follow-up at the 2-year scheduled screening visit. The L0 collection would provide the necessary analogous specimens to those being collected among women in the CVT, and the specimens from the other time points will position us to address many additional questions about anal HPV epidemiology. We also requested to implement collection of oral specimens among women in the UCG at their enrolment visit only, to increase the total number of controls and in turn maximize the power for the evaluation of vaccine efficacy, given the low prevalence of oral HPV16/18 infections observed in our pilot work. In the second amendment we are requesting authorization to prepare anal cytologies using the 2 year anal samples as well as to allow for other research test that are markers of risk (like p16) to study the correlation of anal cytological abnormalities with anal HPV infection and cervical high grade disease. We also requested authorization to collect oral

samples at the 2 year visit among women who were positive for any oral HPV at V48 of CVT to study rates of clearance of oral HPV. In the third amendment we are requesting authorization to collect anal and oral samples at the last regular screening visit (L72) from all participants to evaluate vaccine efficacy at these anatomical sites and are requesting authorization to enroll women who received fewer than three HPV vaccine doses and were not invited previously into LTFU (stopped attending CVT visits, withdrew from CVT or lived outside the study area) as well as a group of women who received all three doses of the vaccine as a comparison group. In the fourth amendment we request authorization for the implementation of co-testing at the last approved screening visit (L72) and to assess the results of this visit according to the Screening Guidelines for the Prevention and Early Detection of Cervical Cancer for all participants to determine the best available clinical management and to define a suggested follow-up screening schedule thereafter. An additional visit and a safety net algorithm are introduced to assure minimal cervical disease risk for the following several years, considering the L72 is a participant's last regular approved screening visit within this study. Also in this amendment we request the Hybrid Capture 2 test is changed to another FDA-approved HPV test method that detects the 13 high-risk HPV types as well, and allows for HPV16/18/45 genotyping.

## **Reference List**

- 1) Cogliano V, Baan R, Straif K, Grosse Y, Secretan B, El Ghissassi F. Carcinogenicity of human papillomaviruses. *Lancet Oncol* 2005;6:204.
- 2) Schiffman M, Castle PE. When to test women for human papillomavirus. *BMJ* 2006;332:61-2.
- 3) Paavonen J, Jenkins D, Bosch FX, Naud P, Salmeron J, Wheeler CM, et al. Efficacy of a prophylactic adjuvanted bivalent L1 virus-like-particle vaccine against infection with human papillomavirus types 16 and 18 in young women: an interim analysis of a phase III double-blind, randomised controlled trial. *Lancet* 2007;369:2161-70.
- 4) Garland SM, Hernandez-Avila M, Wheeler CM, Perez G, Harper DM, Leodolter S, et al. Quadrivalent vaccine against human papillomavirus to prevent anogenital diseases. *N Engl J Med* 2007;356:1928-43.
- 5) Quadrivalent vaccine against human papillomavirus to prevent high-grade cervical lesions. *N Engl J Med* 2007;356:1915-27.
- 6) Harper DM, Franco EL, Wheeler CM, Moscicki AB, Romanowski B, Roteli-Martins CM, et al. Sustained efficacy up to 4.5 years of a bivalent L1 virus-like particle vaccine against human papillomavirus types 16 and 18: follow-up from a randomised control trial. *Lancet* 2006;367:1247-55.
- 7) Villa LL, Costa RL, Petta CA, Andrade RP, Paavonen J, Iversen OE, et al. High sustained efficacy of a prophylactic quadrivalent human papillomavirus types 6/11/16/18 L1 virus-like particle vaccine through 5 years of follow-up. *Br J Cancer* 2006;95:1459-66.
- 8) Hildesheim A, Herrero R, Wacholder S, Rodriguez AC, Solomon D, Bratti MC, et al. Effect of human papillomavirus 16/18 L1 viruslike particle vaccine among young women with preexisting infection: a randomized trial. *JAMA* 2007;298:743-53.
- 9) Hildesheim A, Herrero R. Human papillomavirus vaccine should be given before sexual debut for maximum benefit. *J Infect Dis* 2007;196:1431-2.
- 10) Sawaya GF, Smith-McCune K. HPV vaccination--more answers, more questions. *N Engl J Med* 2007;356:1991-3.
- 11) Safaeian M, Falk RT, Rodriguez A, Hildesheim A, Kemp TJ, Williams M, et al. Factors associated with immune marker fluctuations during the menstrual cycle. *J Infect Dis* Submitted.
- 12) Kemp TJ, Garcia-Pineres AJ, Falk RT, Poncelet S, Dessy F, Giannini S et al. Evaluation of ELISA and Secreted Alkaline Phosphatase Neutralization Assay for the Detection of Anti-HPV16 and 18 Antibody Responses from Vaccinated Women. HPV16/18 type-specific SEAP-NA and ELISA. 2008.
- 13) Cogliano V, Baan R, Straif K, Grosse Y, Secretan B, El Ghissassi F. Carcinogenicity of Human Papillomaviruses. *Lancet Oncol* 2005; 6: 204.
- 14) Chaturvedi AK, Engels EA, Anderson WF, Gillison ML. Incidence Trends for Human Papillomavirus-related and -unrelated Oral Squamous Cell Carcinomas in the United States. *J Clin Oncol* 2008; 26:612-9.
- 15) Sturgis EM, Cinciripini PM. Trends in Head and Neck Cancer Incidence in Relation to Smoking Prevalence: An Emerging Epidemic of Human Papillomavirus-associated Cancers? *Cancer* 2007; 110:1429-35.
- 16) Johnson LG et al. Anal Cancer Incidence and survival: The Surveillance, Epidemiology and End Results Experience, 1973-2000. *Cancer* 2004; 101:281-88.
- 17) Maggard MA, Beanes SR, Ko CY. Anal Canal Cancer: A Population-based Reappraisal. *Dis Colon Rectum* 46.11 (2003):1517-23.
- 18) Brewster DH, Bhatti LA. Increasing Incidence of Squamous Cell Carcinoma of the Anus in Scotland, 1975-2002. *Br J Cancer* 2006; 95: 87-90
- 19) Frisch M, Melbye M, Moller H. Trends in Incidence of Anal Cancer in Denmark. *BMJ* 1993; 306: 419-22.
- 20) IARC-WHO 2003. World Cancer Report. International Agency for Research on Cancer and World Health Organization, Steward BW and Leihues P. 2003. Geneva; Suisse.
- 21) de SanJose S, Alemany L, Quint W, Tous S, Geraets D, Guimera N et al. HPV Burden and Genotype Distribution in Anogenital Cancers Worldwide, 26<sup>th</sup> International Papillomavirus Conference. 2010.
- 22) Hernandez BY et al. Anal Human Papillomavirus Infection in Women and its Relationship with Cervical Infection. *Cancer Epidemiol Biomarkers Prev* 2005; 14: 2550-56.

- 23) Goodman MT et al. Acquisition of Anal Human Papillomavirus (HPV) Infection in Women: The Hawaii HPV Cohort Study. *J Infect Dis* 2008; 197: 957-66.
- 24) Shvetsov YB et al. Duration and Clearance of Anal Human Papillomavirus (HPV) Infection Among Women: The Hawaii HPV Cohort Study. *Clin Infect Dis* 2009; 48: 536-46.
- 25) Palefsky JM. Anal Cancer: How and When to Screen? 26<sup>th</sup> International Papillomavirus Conference 2010.
- 26) Holly EA et al. Prevalence and Risk Factors for Anal Squamous Intraepithelial Lesions in Women. *JNCI* 2001; 93: 843-49.
- 27) Moscicki AB et al. Human Papillomavirus Infection and Abnormal Cytology of the Anus in HIV-infected and uninfected Adolescents. *AIDS* 2003; 17: 311-20.
- 28) Moscicki AB et al. Risk Factors for Abnormal Anal Cytology in Young Heterosexual Women. *Cancer Epidemiol Biomarkers Prev* 1999; 8: 173-78.
- 29) Palefsky JM et al. Prevalence and Risk Factors for Anal Human Papillomavirus Infection in Human Immunodeficiency Virus (HIV)-positive and High-risk HIV-negative Women. *J Infect Dis* 2001; 183: 383-91.
- 30) Kreimer A, Gonzalez P, Hormuzd K, Porras C, Schiffman M, Rodriguez AC et al. Efficacy of a bivalent HPV 16/18 vaccine against anal HPV 16/18 infection among young women: a nested analysis within the Costa Rica Vaccine Trial. *Lancet Oncology* 2011; 12: 862-70.
- 31) Safaeian M, Porras C, Pan Y, Kreimer A, Schiller M, Gonzalez P et al. Durable Antibody Responses Following One Dose of the Bivalent Human Papilloma L1 Virus-Like Particle Vaccine in the Costa Rica Vaccine Trial. *Cancer Prev Res* 2013; 11: 1242-50.
- 32) Kreimer A, Rodriguez AC, Hildesheim A, Herrero R, Porras C, Schiffman M, et al. Proof-of-Principle Evaluation of the Efficacy of Fewer Than Three Doses of a Bivalent HPV 16/18 Vaccine. *JNCI* 2011;105:1444-51.
- 33) Herrero R, Quint W, Hildesheim A, Gonzalez P, Struijk L, Katki H et al. Reduced Prevalence of Oral Human Papillomavirus (HPV) 4 Years after Bivalent HPV Vaccination in a Randomized Clinical Trial in Costa Rica. *PLoS One* 2013; 8:e68329.
- 34) Saslow D, Solomon D, Lawson H, et al. American Cancer Society, American Society for Colposcopy and Cervical Pathology and American Society for Clinical Pathology Screening Guidelines for the Prevention and Early Detection of Cervical Cancer. *Am J Clin Path* 2012;137:516-542.
- 35) Huh WK, Ault KA, Chelmow D et al. Use of Primary High-risk Human Papillomavirus Testing for Cervical Cancer Screening: Interim Clinical Guidance. *Gynecol Oncol* 2015; 136:178-182.
- 36) Wright TC, Stoler MH, Behrens CM et al. Primary Cervical Cancer Screening with Human Papillomavirus: End of Study Results from The ATHENA Study Using HPV as The First-line Screening Test. *Gynecol Oncol* 2015; 136:189-197.
- 37) Castle PE, Sideri M, Jeronimo J et al. Risk Assessment to Guide the Prevention of Cervical Cancer. *J Low Genit Tract Dis* 2008; 12:1-7.
- 38) Katki HA, Schiffman M, Castle PE et al. Benchmarking CIN3+ Risk as the Basis for Incorporating HPV and Pap Cotesting Into Cervical Screening and Management Guidelines. *J Low Genit Tract Dis* 2013;17:S28-s35.
- 39) Kinney W, Wright TC, Dinkelspiel HE et al. Increased Cervical Cancer Risk Associated With Screening at Longer Intervals. *Obstetrics & Gynecology* 2015; 125:311-315.
- 40) Massad LS, Einstein MH, Huh WK et al. 2012 Updated Consensus Guidelines for the Management of Abnormal Cervical Cancer Screening Tests and Cancer Precursors. *J Low Genit Tract Dis* 2013; 17(5): S1-S27.

**Attachment 1**

**“Rationale and design of a community-based double-blind randomized clinical trial of an HPV 16 and 18 vaccine in Guanacaste, Costa Rica”**

**Attachment 2**  
**Invitation letter and informed consent for CVT group**

**Attachment 3**  
**Invitation letter and informed consent for UCG Group**



**Attachment 4**  
**Drafts of risk factor screening questionnaires**

**Attachment 5**  
**Working Group Roster**

**Addendum to Informed Consent version 1**

**Attachment 7**  
**Addendum to Informed Consent version 2**

**Attachment 8**  
**Addendum to Informed Consent version 3**

**Attachment 9**  
**Informed Consent for women who received fewer than three doses of HPV vaccine during CVT and a group with complete vaccination (ICFDCV)**

**Attachment 10**  
**Addendum to Informed Consent version 4**

**Attachment 11**  
**Addendum to Informed Consent Form version 5**



**Attachment 12**  
**Screening Guidelines for the Prevention and Early Detection of Cervical Cancer**

### **Attachment 13 Exit Plan**

The present study will conclude by December 31, 2018, 13 years after completion of enrollment into the original Costa Rica HPV-16/18 Vaccine Trial (CVT) and 6 years after we initiated enrollment of the new control group into the Long-Term Follow-up Phase (LTFU) of our study. As previously approved by the IRB, we are currently implementing HPV and cytology co-testing at the last scheduled screening visit (Visit L72). We are implementing this last visit for all participants. Field efforts to contact and invite all participants to their L72 will be prioritized over the next two years to maximize the opportunity for participants to receive this high quality screening visit before study end. For women who have missed previous visits, this will require that we prioritize bringing them in for the L72 visit rather than other visit types. For women whose L72 visit window closes after the study close-out date, this will involve shortening their visit window to provide them with the opportunity to attend the final co-testing visit during the study period. This will be done while ensuring that the interval between screening visits are no shorter than the recommended 10 months (to avoid over-screening and over-burdening of participants). A revised visit window table that accommodates the need to 1) provide participants with the L72 co-testing screening, 2) ensure a minimum of 10 months between screening visits, and 3) complete the study by the end of 2018 is provided below.

**Windows During the LTFU**

|                            | <b>Earliest Possible Date</b>                 | <b>Last Possible Date</b>              |
|----------------------------|-----------------------------------------------|----------------------------------------|
| <b>UCG 24 month folder</b> |                                               |                                        |
| L0                         | Recruitment start                             | 31-Dec-2014                            |
| L24                        | Date of enrollment + 661                      | Date of enrollment + 1380              |
| L48                        | Date of enrollment + 1381                     | Date of enrollment + 2100              |
| L72                        | Date of enrollment + 2101 <sup>1</sup>        | June 30, 2017                          |
| LX                         | Date L72 completed + 305                      | Date L72 completed + 670 <sup>2</sup>  |
| <b>UCG 6 month folder</b>  |                                               |                                        |
| L0                         | Recruitment start                             | 31-Dec-2014                            |
| L6                         | Date of enrollment + 121                      | Date of enrollment + 300               |
| L12                        | Date of enrollment + 301                      | Date of enrollment + 480               |
| L18                        | Date of enrollment + 481                      | Date of enrollment + 660               |
| L24                        | Date of enrollment + 661                      | Date of enrollment + 840               |
| L30                        | Date of enrollment + 841                      | Date of enrollment + 1020              |
| L36                        | Date of enrollment + 1021                     | Date of enrollment + 1200              |
| L42                        | Date of enrollment + 1201                     | Date of enrollment + 1380              |
| L48                        | Date of enrollment + 1381                     | Date of enrollment + 1560              |
| L54                        | Date of enrollment + 1561                     | Date of enrollment + 1740              |
| L60                        | Date of enrollment + 1741                     | Date of enrollment + 1920              |
| L66                        | Date of enrollment + 1921                     | Date of enrollment + 2100              |
| L72                        | Date of enrollment + 2101 <sup>3</sup>        | June 30, 2017                          |
| LX                         | Date of enrollment + 2821                     | Date of enrollment + 3185 <sup>4</sup> |
|                            | <b>Earliest Possible Date</b>                 | <b>Last Possible Date</b>              |
| <b>CVT 24 month folder</b> |                                               |                                        |
| L0                         | N/A                                           | 31-Dec-2014                            |
| L24                        | Date V48 completed in CVT + 661               | Date V48 completed in CVT + 1380       |
| L48                        | Date V48 completed in CVT + 1381              | Date V48 completed in CVT + 2100       |
| L72                        | Date V48 completed in CVT + 2101 <sup>5</sup> | June 30, 2017                          |
| LX                         | Date L72 completed + 305                      | Date L72 completed + 670 <sup>6</sup>  |
| <b>CVT 6 month folder</b>  |                                               |                                        |
| L0                         | N/A                                           | N/A                                    |
| L6                         | Date V48 completed in CVT + 121               | Date V48 completed in CVT + 300        |
| L12                        | Date V48 completed in CVT + 301               | Date V48 completed in CVT + 480        |
| L18                        | Date V48 completed in CVT + 481               | Date V48 completed in CVT + 660        |
| L24                        | Date V48 completed in CVT + 661               | Date V48 completed in CVT + 840        |
| L30                        | Date V48 completed in CVT + 841               | Date V48 completed in CVT + 1020       |

<sup>1,3,5,7</sup> If this date will occur after Dec 01, 2015, this it will be substituted:

- If the date of her last attended visit (not colposcopy), DOLV was after Jan 01, 2015 then EPD = DOLV + 305
- If her DOLV was prior to Jan 01, 2015, then EPD = Dec 01, 2015

<sup>2,4,6,8</sup> If this date will occur after June 30, 2018, then LPD = June 30, 2018

|                           | <b>Earliest Possible Date</b>                 | <b>Last Possible Date</b>                     |
|---------------------------|-----------------------------------------------|-----------------------------------------------|
| <b>CVT 6 month folder</b> |                                               |                                               |
| L36                       | Date V48 completed in CVT + 1021              | Date V48 completed in CVT + 1200              |
| L42                       | Date V48 completed in CVT + 1201              | Date V48 completed in CVT + 1380              |
| L48                       | Date V48 completed in CVT + 1381              | Date V48 completed in CVT + 1560              |
| L54                       | Date V48 completed in CVT + 1561              | Date V48 completed in CVT + 1740              |
| L60                       | Date V48 completed in CVT + 1741              | Date V48 completed in CVT + 1920              |
| L66                       | Date V48 completed in CVT + 1921              | Date V48 completed in CVT + 2100              |
| L72                       | Date V48 completed in CVT + 2101 <sup>7</sup> | June 30, 2017                                 |
| LX                        | Date V48 completed in CVT + 2821              | Date V48 completed in CVT + 3175 <sup>8</sup> |

Results from this screening visit will be used to determine clinical management needs, as per the previously approved colposcopy referral algorithm summarized in Figure 5 (page 38). These procedures are consistent with current clinical management recommendations by professional societies.

To finalize the participant exit process, once the last screening (L72) visit (LX visit, if required per our management algorithm) and associated clinical management colposcopy visit are completed, we plan to provide individual participants with a letter that summarizes her results and that recommends a future screening plan given her history. In this letter, we will also recommend that the participant share the information provided to her with her primary care physician. This procedure is similar to the successful exit process we implemented when individuals from the Havrix arm of our CVT trial were exited after the LTFU 2 years visit. The letter will be provided to participants by one of the following methods: certified mail, email or hand delivery. Method of delivery and delivery attempts will be documented to maximize completion of this exit phase of our study
